# Supplementary material for: Bimodality in pan-cancer proteomics reveals new opportunities for biomarker discovery
Source: bioRxiv preprint, doi:10.1101/2025.03.03.641218, version 1 (2025-03-09)
Supplement: Supplemental Table 1 [file 641218_file02.xlsx]

## Sheet: Table of Contents
Table of Contents
Table_S1	BI_benchmark	Evaluation of BI using 100 known bimodal and unimodal distributions with different sample sizes (N=1000, 300, 100, 70, 50, 30). Max_thr: the value of BI when max(TPR-FPR). Tpr_mean: Mean of true positive rate. Fpr_mean: Mean of false positive rate.
	BIC diff_benchmark	Evaluation of BIC diff using 100 known bimodal and unimodal distributions with different sample sizes (N=1000, 300, 100, 70, 50, 30). Max_thr: the value of BIC diff when max(TPR-FPR). Tpr_mean: Mean of true positive rate. Fpr_mean: Mean of false positive rate.
	TABP	Tumor-associated bimodal proteins: bimodal proteins only found in tumors not in matched normal tissues.
	CPTAC_BRCA_T	In BRCA tumor cohort, for each protein, we calculated BI, BIC diff and the number of samples with this protein quantified.
	CPTAC_CCRCC_N	In CCRCC normal cohort, for each protein, we calculated BI, BIC diff and the number of samples with this protein quantified.
	CPTAC_CCRCC_T	In CCRCC tumor cohort, for each protein, we calculated BI, BIC diff and the number of samples with this protein quantified.
	CPTAC_COAD_N	In COAD normal cohort, for each protein, we calculated BI, BIC diff and the number of samples with this protein quantified.
	CPTAC_COAD_T	In COAD tumor cohort, for each protein, we calculated BI, BIC diff and the number of samples with this protein quantified.
	CPTAC_GBM_T	In GBM tumor cohort, for each protein, we calculated BI, BIC diff and the number of samples with this protein quantified.
	CPTAC_HNSCC_N	In HNSCC normal cohort, for each protein, we calculated BI, BIC diff and the number of samples with this protein quantified.
	CPTAC_HNSCC_T	In HNSCC tumor cohort, for each protein, we calculated BI, BIC diff and the number of samples with this protein quantified.
	CPTAC_LSCC_N	In LSCC normal cohort, for each protein, we calculated BI, BIC diff and the number of samples with this protein quantified.
	CPTAC_LSCC_T	In LSCC tumor cohort, for each protein, we calculated BI, BIC diff and the number of samples with this protein quantified.
	CPTAC_LUAD_N	In LUAD normal cohort, for each protein, we calculated BI, BIC diff and the number of samples with this protein quantified.
	CPTAC_LUAD_T	In LUAD tumor cohort, for each protein, we calculated BI, BIC diff and the number of samples with this protein quantified.
	CPTAC_OV_T	In OV tumor cohort, for each protein, we calculated BI, BIC diff and the number of samples with this protein quantified.
	CPTAC_PDAC_N	In PDAC normal cohort, for each protein, we calculated BI, BIC diff and the number of samples with this protein quantified.
	CPTAC_PDAC_T	In PDAC tumor cohort, for each protein, we calculated BI, BIC diff and the number of samples with this protein quantified.
	CPTAC_UCEC_T	In UCEC tumor cohort, for each protein, we calculated BI, BIC diff and the number of samples with this protein quantified.

## Sheet: BI_benchmark
N	max_thr	tpr_mean	tpr_std	fpr_mean	fpr_std	tpr_fpr_mean	tpr_fpr_std
30	1.35	0.633191	0.068836	0.179434	0.051129	0.453758	0.090297
50	1.25	0.70234	0.057338	0.133962	0.044025	0.568378	0.069025
70	1.2	0.742766	0.049516	0.104906	0.040876	0.63786	0.065083
100	1.1	0.835319	0.043364	0.12434	0.042241	0.71098	0.058793
300	1.05	0.888085	0.031079	0.023019	0.01926	0.865066	0.037362
1000	0.95	0.964468	0.017905	0.00566	0.010558	0.958808	0.021534

## Sheet: BIC diff_benchmark
N	max_thr	tpr_mean	tpr_std	fpr_mean	fpr_std	tpr_fpr_mean	tpr_fpr_std
30	3	0.686809	0.064795	0.178491	0.050344	0.508318	0.079079
50	4	0.788298	0.048516	0.151509	0.041585	0.636788	0.055413
70	4	0.817021	0.04848	0.096792	0.039474	0.720229	0.062271
100	5	0.880851	0.039776	0.09566	0.038978	0.785191	0.046727
300	5	0.958511	0.022907	0.01717	0.016552	0.941341	0.027615
1000	5	0.998298	0.006542	0.001509	0.005145	0.996788	0.008496

## Sheet: TABP
IDX
A1BG
AAED1
AAR2
AARS2
ABAT
ABCB10
ABCB6
ABCB8
ABCC1
ABCC2
ABCC3
ABCC5
ABCD3
ABCF2
ABCG2
ABHD12
ABHD5
ABL1
ABLIM3
ABR
ABRAXAS1
ABRAXAS2
ABT1
ABTB1
ACAD11
ACAP2
ACAP3
ACD
ACHE
ACOT11
ACOT7
ACSL1.1
ACTA1
ACTA2
ACTG1
ACTN1
ACTN4.1
ACYP1
ADAMTS13
ADAMTS15
ADAMTSL4
ADD2
ADGRG1
ADGRG6
ADGRL3
ADGRL4
ADGRV1
ADH5
ADH7
ADH7.1
ADIPOR1
ADNP
ADNP2
ADPRHL2
ADRM1
ADSL
ADSSL1
AFAP1L2
AFDN
AFF1
AFM
AFMID
AGAP3
AGFG1
AGMAT
AGO3
AGPAT3
AGPAT4
AGT
AHCY
AHSG.1
AHSP
AIG1
AIMP1
AIP
AK1
AK2
AKAP5
AKR1C1
AKR1C2
AKR1C3
AKR7A2
AKT2
ALB
ALDH16A1
ALDH18A1.1
ALDH3A1
ALDH7A1
ALDH8A1
ALDOB
ALG10
ALG10B
ALKBH4
ALOX15B
ALOX5AP
ALPL
ALPP
ALYREF
AMBP
AMER1
AMOT
ANAPC1
ANAPC13
ANAPC7
ANGPTL2
ANGPTL8
ANK1
ANKK1
ANKRD1
ANKRD13A
ANKRD16
ANKRD2
ANKRD22
ANKRD26
ANO8
ANP32E
ANTXR1
ANXA5
ANXA6.1
ANXA8
AOC1
AOC3
AP1B1
AP1M1
AP1S3
AP3B1
AP3D1
AP3M1
AP3S1
AP3S2
AP4B1
APBA3
APC2
APEH
APH1A
APIP
APOA1
APOA2
APOA4
APOBEC2
APOBEC3A_B
APOBR
APOE
APOF
APOH
APOL6
APOM
AQP8
ARAP3
ARCN1
ARF1
ARF3
ARF5
ARFGAP1
ARFGAP3
ARFIP1.1
ARG1
ARG2
ARHGAP1
ARHGAP12
ARHGAP26
ARHGAP31
ARHGAP42
ARHGDIA
ARHGEF12
ARHGEF15
ARHGEF25
ARHGEF7
ARID2
ARIH1
ARL1
ARMC5
ARMCX4
ARMCX5
ARSA
ART3
ARVCF
ASAH1
ASF1B
ASNS
ASPA
ASPG
ASPN
ASPRV1
ASRGL1
ATAD2B
ATF1
ATG14
ATG4A
ATG7
ATG9A
ATL2
ATP11A
ATP13A3
ATP1B1
ATP2B1
ATP5MPL
ATP5PB
ATP6V1B1
ATP6V1C1
ATP6V1G2
ATP7A
ATRN
ATXN1
ATXN2L
ATXN3
AURKA
AVEN
AZGP1
AZU1
B3GNT2
B3GNT9
B4GALNT2
B9D2
BABAM1
BABAM2
BACE2
BAG4
BAIAP2
BAIAP2L1
BAIAP2L2
BAK1
BANK1
BARD1
BASP1
BCAP31
BCAS1
BCAT1
BCHE
BCL11A
BCL2L2-PABPN1
BCLAF3
BDH1
BDP1
BGN
BICD2
BLOC1S1
BLOC1S2
BLOC1S4
BLVRA
BLVRB
BMP2K
BNIP1
BNIP3
BOLA2
BORCS5
BPGM
BPI
BPIFA1
BPIFB6
BRAF
BRD1
BRD7
BRE
BRK1
BRPF3
BSCL2
BTD
BTN3A2
BTNL9
BUB1B-PAK6
BUD13
C11orf95
C11orf98
C15orf48
C16orf96
C18orf21
C18orf25
C19orf54
C1orf21
C2orf69
C2orf76
C2orf88
C4orf54
C5
C5orf15
C6orf10
C6orf223
C6orf89
C7
C8orf59
C9orf16
C9orf40
C9orf64
CA1
CA1.1
CA2
CA3
CA6
CA9
CABIN1
CACNA2D1
CACYBP
CAGE1
CALB1
CALD1
CALD1.2
CALHM5
CALML3
CALU
CALU.1
CAMK2D
CAMK2G.1
CAMK4
CAMP
CAND2
CAP1.1
CAPN1
CAPN6
CARD10
CARD8
CARHSP1
CASKIN2
CASP14
CASP4
CAST.1
CAT
CAV1
CBLB
CBR1
CBR3
CBWD6
CC2D1A
CCAR2
CCDC150
CCDC25
CCDC68
CCDC88B
CCL21
CCND3
CCNT1
CCNT2
CCNY
CCNYL1
CCT8
CD177
CD1A
CD207
CD209
CD38
CD4
CD40
CD47
CD48
CD53
CD59
CD5L
CD68
CD70
CD72
CD74
CD74.1
CD79A
CD99
CD99L2
CDC25C
CDC42BPA
CDC42BPB
CDC7
CDCA7L
CDH11
CDH5
CDK1
CDK11A
CDK11B
CDK12
CDK13
CDK20
CDK4
CDKL5
CDKN2AIPNL
CDNF
CDR2L
CDS1
CDYL2
CEACAM1
CEBPB
CEL
CELA3A
CELF1
CELSR1
CEMIP
CENPM
CENPQ
CENPV
CEP131
CEP290
CEP70
CERS2
CERS3
CES1
CFAP77
CFD
CFH
CFHR2
CFHR4
CFI
CGNL1
CHAF1A
CHAF1B
CHEK1
CHGA
CHL1
CHST11
CHURC1
CIAO3
CIP2A
CISD1
CIT
CITED2
CKB
CKMT2
CLCC1
CLCN3
CLCN5
CLCN7
CLCNKB
CLEC12A
CLEC14A
CLEC3B
CLGN
CLIC2
CLIC6
CLINT1.1
CLIP4
CLK2
CLN3
CLNK
CLPTM1
CLSTN1
CLTA
CMA1
CMBL
CMC4
CMKLR1
CMTM6
CNBP
CNBP.1
CNDP1
CNEP1R1
CNFN
CNIH4
CNKSR1
CNN2
CNN3
CNRIP1
COBLL1
COG2
COG4
COG5
COG7
COG8
COL11A1
COL12A1
COL1A1
COL1A2
COL21A1
COL23A1
COL3A1
COL4A3BP
COL4A4
COL5A3
COL6A1
COL6A3
COLEC11
COLGALT2
COMMD2
COMMD9
COPA
COPB1
COPB2
COPG1
COPG2
COPS4
COPZ1
COPZ2
COQ8B
CPA3
CPB2
CPD
CPE
CPEB3
CPEB4
CPN1
CPSF7
CPT1A
CPXM2
CR1
CRB2
CRBN
CRCP
CREBRF
CRH
CRMP1
CROCC
CRTAP
CRYBB1
CRYM
CSAD
CSDC2
CSF1R
CSNK1G2
CSNK2A1
CSPP1
CST6
CSTA
CT45A10
CTDP1.1
CTDSPL2
CTNNBL1
CTSA
CTSD
CTSE
CTSZ
CUL7
CUTA
CUX2
CWC15
CWC27.1
CWF19L2
CXADR
CXCL1
CXCL14
CXCL6
CXCL8
CXCR4
CXorf40B
CYB5A
CYB5R1
CYB5R2
CYP24A1
CYP2S1
CYP3A5
CYP4F22
CYP4V2
CYP8B1
CYTL1
DAAM1
DALRD3
DARS
DAZAP2
DCAF13
DCAF15
DCAKD
DCBLD2
DCLK1
DCLK2
DCN
DCP2
DCTN5
DCTPP1
DCUN1D1
DDAH2
DDB2
DDHD2
DDI2
DDX21
DDX24
DDX27
DDX49
DDX58
DDX60
DEFA1B
DEFA6
DEFB112
DENND3
DEPDC7
DERL2
DGCR8
DGKH
DHCR24
DHRS2
DHRS3
DHX35
DHX37
DHX38
DHX57
DHX9
DIAPH1
DIDO1
DIRC2
DIXDC1
DKK3
DLG4
DMAP1
DMTN.1
DNAAF2
DNAH2
DNAH5
DNAH9
DNAI2
DNAJA1
DNAJA2
DNAJB1
DNAJB4
DNAJC1
DNAJC12
DNAJC2
DNAJC9
DNASE2
DNLZ
DOCK1
DOCK1.1
DOCK8
DPEP2
DPF2
DPH3
DPP8
DPT
DPY30
DPYD
DPYSL3
DPYSL4
DSC3
DSG3
DSP
DST
DTD1
DTD2
DTNB
DUOX2
DUS1L
DUS3L
DUSP14
DUSP23
DUT
DVL2
DYM
DYNC1I1
DYNC2LI1.1
DYNLL1
DYNLL2
DYNLT3
DZANK1
DZIP3
EBF1
ECM1
EDC3
EDEM3
EDRF1
EED
EEF1A2
EEF1E1
EEF2
EFEMP1
EFHC2
EFR3A
EGFR
EHD4
EHMT1
EHMT2
EI24
EIF1AX
EIF3F
EIF3M
EIF4ENIF1
EIF5B
ELAC1
ELANE
ELL2
ELN
ELOF1
ELOVL5
ELP2
EMC10
EMC6
EMC7
EMC8
EME1
EML1
ENO3
ENOPH1
ENPP4
EOGT
EOMES
EPB41.1
EPB41L2.2
EPB41L4A
EPCAM
EPG5
EPHA1
EPHB3
EPHB6
EPHX1
EPM2A
EPPK1
EPRS
EPS15L1
EPS8
EPS8L1
EPS8L3
ERAP2
ERBB2
ERCC1
ERCC2
ERCC8
ERGIC3
ERH
ERI3
ERMAP
ERMP1
ERN1
ERO1A
ERO1B
ERV3-1-ZNF117
ESAM
ESF1
ESRRA
ESS2
ETAA1
ETHE1
ETNK1
ETV6
EVI2B
EVPL
EXD3
EXOC4
EXOSC2
EXOSC7
EXPH5
EXT2
EZH2
F10
F12
FAAH
FABP1
FABP4
FABP6
FADD
FAM114A2
FAM120A
FAM120C
FAM136A
FAM160B1
FAM177A1
FAM205A
FAM208A
FAM20C
FAM213B
FAM221A
FAM234A
FAM25C
FAM3B
FAM43A
FAM76A
FAM98A
FAM98C
FANCI
FAP
FAR1
FARSB
FASN
FBLN5
FBLN7
FBN1
FBN2
FBRSL1
FBXL14
FBXL8
FBXO10
FBXO2
FBXO7
FBXW5
FCGR2B.1
FCGR2C
FCN2
FDFT1
FDX1
FDXR
FEM1B
FERMT1
FETUB
FGD3
FGFR1
FGFR1OP2
FHL5
FILIP1
FIS1
FITM2
FIZ1
FKBP14
FKBP1B
FKBP2
FKBP3
FKBP7
FKBP8
FLNA.1
FLNB.1
FLYWCH1
FLYWCH2
FMC1
FMN1
FMO2
FMOD
FN1
FNDC1
FNDC3B
FNTA
FOLR1
FOLR3
FOS
FOXP1
FREM2
FRK
FRZB
FSTL4
FTH1
FTL
FTO
FUCA1
FUK
FUT11
FXYD1
FYN
FZD1
FZD6
G6PD
GABRB1
GADD45GIP1
GAGE2B
GAK
GAL3ST1
GALNT3
GALNT7
GALNT8
GALT
GAP43
GAS7
GAST
GATAD2B
GBA
GBA2
GBA3
GBP1
GBP5
GBP6
GC
GCLC
GCLM
GCN1
GDA
GDE1
GEMIN8
GFRA3
GGA3
GGH
GGT6
GINS2
GIT1
GLIPR1
GLRX2
GLRX3
GLS
GLYATL2
GMDS
GMNN
GMPPB
GMPR2
GNAO1
GNB1
GNB1L
GNB3
GNG7
GNL3
GOLGA3
GOLPH3
GOLPH3L
GOPC
GOSR1
GOT1
GPA33
GPAA1
GPAT3
GPATCH8
GPC6
GPI
GPLD1
GPR155
GPT2
GPX2
GPX7
GRAMD1C
GRB14
GRB2
GREM1
GRHL2
GRIP1
GRN
GRPEL2
GSC
GSDMA
GSDMB
GSDME
GSPT1
GSPT2
GSR
GSTA1
GSTM2
GSTM3
GSTP1
GSTT1
GTF2H3
GTF2IRD1
GTF3C3
GTF3C4
GTF3C5
GTPBP2
GTPBP3
GTPBP4
GTSF1
GUCY1A1
GYPA
GZMM
H1F0
H2AFY
H2AFY2
HABP4
HADH
HAPLN1
HAUS2
HAUS7
HBA2
HBB
HBD
HBE1
HBG1
HBM
HBQ1
HBZ
HCK.1
HDAC5
HDGF
HDGFL3
HDHD2
HEATR1
HECA
HECTD1
HELB
HELLS
HEPH
HEXB
HGD
HGFAC
HID1
HIF1A
HINT3
HIST1H1B
HIST1H2AB
HIST2H2BE
HIST2H3A
HIST2H3PS2
HIST3H3
HIVEP3
HK2
HKDC1
HLA-C.1
HLA-DQB1
HLA-DRA
HLA-DRB4
HLA-DRB5
HLA-F
HM13
HMBS
HMCN1
HMGA2
HMGXB3
HNMT
HNRNPA2B1
HNRNPA3
HNRNPC.1
HNRNPK.1
HNRNPUL1
HOMER1
HOOK2
HOOK3
HP
HPGD
HPGDS
HPR
HPX
HSD17B13
HSD17B14
HSD17B6
HSD3B7
HSDL1
HSP90AB1
HSPA12B
HSPA13
HSPA14
HSPB7
HSPB8
HSPG2
HSPH1
HTRA1
HVCN1
IARS
ICAM2
ICAM3
IDO1
IDUA
IFI16.1
IFI30
IFI44
IFI44L
IFRD1
IFT22
IFT27
IGF2
IGF2BP1
IGF2BP2
IGF2BP3
IGF2R
IGFALS
IGFBP2
IGFBP5
IGFLR1
IL1A
IL1R2
IL27RA
IL37
IL4I1
IMPAD1
IMPDH2
ING1
ING5
INHBC
INPP4B
INPP5A
INTS11
INTS14
IP6K1
IPO4
IQCB1
IREB2
IRF4
IRS2
IRS4
IRX3
ISOC1
ITGA11
ITGA4
ITGA5
ITGA8
ITGA9
ITGAV
ITGB3
ITGB4
ITGB6
ITGB7
ITIH2
ITIH4.1
ITLN2
ITPRID2
ITSN1
IVL
JAG1
JAGN1
JCHAIN
JMJD1C
JMJD7
JMY
JUN
KANK3
KAT6A
KAT7
KCNAB2
KCNE3
KCNMA1
KCTD10
KDELR1
KDM1A
KDM3A
KERA
KHDRBS3
KIAA0232
KIAA0319L
KIAA0556
KIAA0753
KIAA0754
KIAA0930
KIAA1143
KIAA1324
KIDINS220
KIF1B
KIF2C
KIF4A
KIF5A
KIF5B
KIFAP3
KIZ
KLHDC2
KLHDC7B
KLHL15
KLHL36
KLK10
KLKB1
KNDC1
KNL1
KNSTRN
KNTC1
KRAS
KRT10
KRT14
KRT15
KRT16
KRT17
KRT18
KRT19
KRT23
KRT5
KRT6B
KRT74
KRT75
KRT8
KRT84
KRT9
L1CAM
LACTB2
LAMA2
LAMA4.1
LAMB1
LAMB3
LAMC2
LAMP1
LANCL2
LARP4
LARS
LAX1
LCAT
LCK
LCMT1
LCN2
LCT
LDB1
LDB3.2
LDHAL6A
LDHB
LEF1
LEMD3
LGALS4
LGALS7B
LHFPL2
LIG3
LILRB4
LIMA1.1
LIMCH1
LIME1
LIME1.1
LIMK1
LINS1
LIPA
LITAF
LMNB2
LMO4
LOXL3
LPCAT3
LPIN2
LPL
LPP
LRP11
LRP1B
LRRC15
LRRC49
LRRK1
LRSAM1
LSM14B
LSM2
LSM5
LSS
LTBP4
LTV1
LUM
LY75
LYPD5
LYPLA2
LYRM4.1
LZTFL1
MACO1
MADD
MAGEA1
MAGEA10
MAGEA3
MAGEA4
MAGEA6
MAGEA9B
MAGEB2
MAGEB3
MAIP1
MALT1
MAMDC2
MAML1
MAML3
MAN1A1
MAN1C1
MANF
MAOA
MAOB
MAP10
MAP1A
MAP1B
MAP1LC3A
MAP2
MAP2K2
MAP2K7
MAP3K1
MAP3K4
MAP4
MAP4K4
MAP7D1
MAPK1
MAPK12
MAPK13
MAPK7
MAPK9
MAPKAPK3
MAPT.2
MARK2
MARK2.1
MARK3
MARVELD3
MASP1.1
MAST2
MATN1
MAU2
MAZ
MBD4
MBIP
MBL2
MBLAC2
MBTPS1
MCAT
MCFD2
MCM4
MCM5
MCM6
MCRIP2
MCRS1
MCTP2
MDC1
MDN1
ME1
ME2
MECOM
MED10
MED13L
MED20
MED24
MED30
MEIS1
MERTK
METRNL
METTL15
METTL21A
METTL26
METTL7A
METTL8
MFAP1
MFAP4
MFSD10
MGARP
MGAT1
MGAT4A
MGMT
MIB1
MICAL3
MID2
MIEN1
MIER2
MIF4GD
MIGA1
MIGA2
MIS18BP1
MKRN2
MLH1
MLLT10
MLLT6
MLPH.1
MLYCD
MMP1
MMP10
MMP19
MMP24
MMP3
MMP8
MMP9
MMRN1
MMRN2
MOB2
MOCOS
MOCS1
MPC1
MPEG1
MPI
MPO
MPP5
MRAS
MRC2
MRPL4
MRPL45
MRPS16
MRTO4
MSANTD2
MSI1
MSLN
MSN
MST1
MT1G
MT3
MTA1
MTERF4
MTFMT
MTFP1
MTHFR
MTIF3
MTMR11
MTOR
MTR
MTTP
MTURN
MUC13
MUC16
MUC19
MUC2
MUC3A
MUC4
MUL1
MUM1
MUSTN1
MVD
MVK
MVP
MXRA5
MYADM
MYBPC1
MYCBP2
MYEF2.1
MYH14
MYH3
MYH7
MYL4
MYLK3
MYLK4
MYO15B
MYO1E
MYO3A
MYO6
MYO6.1
MYO7B
MZB1
N4BP1
N4BP2L1
NAA16
NAAA
NACA2
NACAD
NADK.1
NADK2
NAF1
NAGPA
NAIP
NAMPT
NANP
NAPB
NAPEPLD
NAT1
NAT10
NBR1
NCAM1
NCAPD2
NCAPG
NCAPH
NCAPH2
NCKAP1
NCL
NCOA7.1
NDOR1
NDUFA4L2
NDUFB11
NDUFS2
NDUFS3
NDUFS8
NEDD8
NEFL
NEFM
NEK3
NEK4
NEK8
NELL1
NES
NEU3
NFKBIE
NFRKB
NFXL1
NGDN
NIM1K
NIPSNAP3A
NIT1
NLRP1
NLRP2
NME4
NMNAT1
NMT1
NNMT
NOC2L
NOCT
NOL10
NOL11
NOL6
NOMO2
NOP53
NOS1
NOS2
NOSIP
NOTCH2
NOTCH3
NOXA1
NPC1
NPEPPS
NPM1
NPNT
NPNT.1
NPR3
NPTX2
NQO1
NQO2
NR0B1
NR2C2
NR2F1
NR2F2
NR2F6
NRBP1.1
NRCAM
NRDE2
NRIP1
NRP2
NSA2
NSD3
NSMAF
NSMCE1
NSUN6
NT5C
NT5C1A
NT5C2
NT5C3A
NT5DC3
NT5E
NT5E.1
NTN1
NTN4
NUBP2
NUDC
NUDCD2
NUDT1
NUDT16
NUDT21
NUDT22
NUDT3
NUDT5
NUDT7
NUFIP1
NUMA1.1
NUP107
NUP160
NUP210
NUP35
NUP54
NUP62
NUP93
OAF
OAS3
OCIAD2
OCLN
OCRL
ODF2
OGFOD2
ORC6
ORM1
ORM2
OS9
OSBPL9
OSTC
OTULIN
OXNAD1
P3H2
P4HA1
P4HA1.1
P4HA2
P4HTM
PABPC3
PABPC4L
PABPN1
PADI1
PADI3
PADI4
PAGE2B
PALD1
PALLD
PALLD.1
PAPPA
PARD3B
PARP4
PATJ
PAWR
PBK
PCBD2
PCDH12
PCID2
PCM1
PCNA
PCP4
PCP4L1
PCSK1
PCSK1N
PDCD2
PDE10A
PDE11A
PDE1A
PDE4DIP
PDE5A
PDGFC
PDGFRB
PDIA6
PDK1
PDK4
PDLIM7
PDXK
PDXK.1
PDXP
PDZD11
PDZRN3
PECR
PER2
PERM1
PEX10
PEX19
PFDN1
PFDN5
PFKFB4
PGBD5
PGC
PGD
PGF
PGLS
PGM2L1
PGM5
PGP
PGR
PHAX
PHF1
PHF21B
PHF3
PHGDH
PHKG2
PHLDA1
PHLDB3
PHPT1
PHYHIPL
PI16
PI4K2B
PIAS2
PIAS4
PIBF1
PIGM
PIGN
PIGR
PIR
PITHD1
PITRM1
PKD2
PKP1
PKP2
PKP3
PLA2G12B
PLA2G15
PLA2G4A
PLBD2
PLCB4
PLCD3
PLEKHA1.1
PLEKHA7
PLEKHG4
PLEKHG4B
PLEKHJ1
PLEKHS1
PLOD2
PLPBP
PLPP6
PLXDC2
PLXNA1
PMFBP1
PML.1
PMM2
POC5
POF1B
POGK
POLD1
POLR1C
POLR2C
POLR2K
POLR3GL
PON1
PON3
POP1
POP5
POSTN.3
POTEF
POU2F2
POU4F2
PPFIA1
PPIC
PPIG
PPIH
PPIL3
PPIP5K1
PPM1F
PPM1H
PPM1M
PPP1CC
PPP1R10
PPP1R12B
PPP1R12C
PPP1R13B
PPP1R14C
PPP1R16A
PPP1R1B
PPP2R1B
PPP2R3A
PPP2R5D
PPP2R5E
PPP3CC
PPP4C
PPP4R3A
PPP4R4
PQBP1
PQLC1
PRAME
PRDX1
PRDX5
PRELP
PREPL
PRF1
PRH1
PRICKLE1
PRICKLE3
PRKACG
PRKAR1B
PRKAR2A
PRKCA
PRKCI
PRKN
PRMT3
PROC
PRPF18
PRPF40A
PRR12
PRR14
PRR14L
PRRC1
PRRC2B
PRRX1
PRSS1
PRSS22
PRUNE1
PRX
PSD4
PSMB1
PSMB4
PSMB5
PSMB6
PSMB7
PSMC5
PSMD10
PSMD2
PSMD3
PSMD4
PSMD6
PSME2
PSMF1.1
PSMG1
PTGES3
PTGR1
PTGS1
PTGS2
PTPMT1
PTPN1
PTPN13
PTPN14
PTPN23
PTPN3
PTPRB
PTPRG
PTPRJ
PTPRU
PTPRZ1
PTRH2
PUM1
PUM2
PUS3
PVR
PWWP2B
PYCR2
PYGB
PYROXD2
QARS
QPCT
QSER1
QSOX2
QTRT2
R3HDM1
RAB11FIP2
RAB11FIP3
RAB18
RAB3B
RAB5IF
RAB6B
RAB6D
RABAC1
RABGEF1
RACGAP1
RACK1
RAD23A
RAD23A.1
RAD50
RAD51B
RAD54B
RAF1
RALYL
RAMAC
RAN
RANBP17
RANBP3
RAP1B
RAP2A
RAPGEF2
RARS
RASA1
RASSF10
RASSF5
RASSF6
RB1CC1
RBKS
RBM23
RBM5
RBM7
RBM8A
RBMX
RBP1
RBPJ
RBPMS
RBX1
RC3H2
RCCD1
RCSD1
RDH10
REG3A
REG3G
REM1
REPS1
REST
REXO1
REXO2
REXO4
RFC1
RFC2
RFC5
RFESD
RFLNB
RFX1
RFX3
RFX7
RGP1
RGPD3
RGS18
RHAG
RHBDD3
RHOC
RHOH
RIC8B
RINT1
RIOK3
RIOX1
RIPK2
RLIM
RMDN1
RMND5A
RNASE6
RNASE7
RNASET2
RND3
RNF11
RNF113A
RNF114
RNF121
RNF123
RNF126
RNF138
RNF141
RNF168
RNF20
RNF220
RNF4
RNF5
RNF6
RNF7
RNH1
RNLS
RNPC3
ROCK1
ROR1
RPIA
RPL10
RPL15
RPL18A
RPL22L1
RPL28
RPL3
RPL30
RPL34
RPL35A
RPL9
RPLP0
RPLP1
RPP30
RPP38
RPRD2
RPS12
RPS15A
RPS19BP1
RPS2
RPS20
RPS21
RPS27
RPS27A
RPS28
RPS29
RPS3A
RPS4X
RPS5
RPS6KA1
RPS7
RPTN
RPUSD1
RPUSD2
RRM2
RRP1
RRP36
RSBN1L
RSL1D1
RSPH9
RTEL1
RTF1
RTN2
RUFY2
RWDD3
S100A1
S100A12
S100A14
S100A16
S100A2
S100A3
S100A8
S100A9
S100P
SAA1
SACM1L
SAE1
SAMD12
SAMD4A
SAV1
SAXO2
SAYSD1
SBNO1
SCAF1
SCAF4
SCG2
SCGB3A2
SCGN
SCOC
SCP2
SCUBE2
SCYL3
SDHD
SDR16C5
SDS
SEC11A
SEC11C
SEC14L1
SEC14L4
SEC23B
SEC23IP
SEC24A
SEC61A1
SEC63
SELENBP1
SELENOK
SELENOM
SELL
SELP
SELPLG
SEMA3F
SEMA4A
SEMA5B
SENP5
SENP7
SENP8
SEPT10'
SEPT6'
SEPT7.2
SEPT7'
SERPINA1
SERPINA10
SERPINA3
SERPINA4
SERPINA6
SERPINA7
SERPINB10
SERPINB12
SERPINB13
SERPINB2
SERPINB4
SERPINB5
SERPIND1
SERPINF1
SERPINF2
SERPINI1
SESN3
SET.2
SETD6
SF1
SF3A2
SF3A3
SF3B3
SFRP1
SFRP2
SFSWAP
SFTPC.1
SGCG
SGK2
SH2B1
SH2D4A
SH3BGRL2
SH3BP2
SH3BP4
SH3BP5L
SH3GLB1
SHANK3
SHARPIN
SHBG
SHISA2
SHMT2
SIGLEC9
SIPA1L2
SIPA1L3
SIRT2
SIVA1
SLAIN2
SLAMF6
SLC12A9
SLC15A3
SLC16A8
SLC1A2
SLC1A5
SLC22A23
SLC23A2
SLC25A1
SLC25A21
SLC25A3
SLC25A36
SLC25A51
SLC30A6
SLC35D1
SLC36A1
SLC38A1
SLC38A10
SLC38A5
SLC39A4
SLC39A7
SLC40A1
SLC4A1
SLC4A2
SLC4A7
SLC51B
SLC7A1
SLC7A5
SLC9A6
SLC9A8
SLFN11
SLFN13
SLK
SLMAP
SMAP1
SMARCA1
SMARCA2
SMC2
SMC3
SMC4
SMC5
SMC6
SMCR8
[truncated: 402 more rows]

## Sheet: CPTAC_BRCA_T
	BI_mean	bic_diff_mean	N
ABCA8	1.1357	8.16993	31
CHGB	0.669803	7.26636	32
BMPER	0.462285	3.28611	33
NCKAP5	2.01162	2.09325	33
JSRP1	1.23591	6.36852	34
RNF17	0.534015	9.79349	34
SRRM3	4.65814	-12.8376	34
ULK4	0.891886	-4.89639	34
VIT	0.462132	9.06385	34
ANKRD18A	2.70953	-4.1631	35
ATAD5	1.10001	9.22419	35
BPIFB4	1.63999	6.31888	35
CARTPT	1.46829	-2.66831	35
SHCBP1L	1.25848	1.65859	35
LRRIQ1	0.376354	4.14844	39
NCAN	0.330044	6.80264	39
VWDE	0.946984	10.8588	39
CEL	1.02142	-5.76335	40
ZNF750	0.546324	11.2488	40
CRLF1	0.644774	-2.51898	41
FER1L6	0.956896	11.6691	41
GALNT9	0.478004	9.6118	41
GNAT3	0.338331	-0.620981	41
HPD	0.706971	1.25251	41
MYOM2	2.91902	-30.5062	41
PARK2	1.7491	0.89447	41
SLC25A32	0.537607	9.82683	41
TERT	0.713912	11.2521	41
ZNF226	0.572214	11.3189	41
ABHD3	0.429977	3.92444	42
CCDC144A	0.36225	9.19253	42
KIAA2012	1.10074	10.257	42
LRRC6	1.30451	6.50699	42
SEL1L2	1.13532	10.1049	42
SLC13A3	0.105499	7.68945	42
USH2A	0.286022	9.31973	42
ZIC2	0.84362	0.720656	42
ATP8B2	1.10654	10.4676	43
CFAP44	1.03631	8.69463	43
CTF1	0.470027	7.8182	43
ESPL1	0.593643	11.0468	43
HCN3	0.907968	10.625	43
INSM1	3.2135	-19.7319	43
IQCD	1.61006	4.25111	43
PCOLCE2	0.651911	-12.9083	43
PTPRN2	1.4932	-7.73927	43
RAPGEF3	0.346624	9.37802	43
SNAP25	0.738891	2.03239	43
ZBTB24	4.77941	-12.9765	43
ZP2	1.05912	5.90544	43
ANKRD46	2.0206	-3.15984	44
GRIA2	0.463447	10.9005	44
KCNH1	1.30626	1.16611	44
KCNH5	0.400194	10.0144	44
SULT1E1	1.06413	-15.9071	44
ZAN	0.778046	7.77907	44
CC2D2A	0.698173	-1.19917	45
FAM84A	0.859811	4.77722	45
PSD	1.16979	4.91597	46
PYGO1	0.879113	12.0236	46
SHF	0.590019	10.6863	47
COL21A1	1.31744	8.17701	48
CPA4	0.702062	-11.1864	48
HPDL	1.49651	6.97699	48
ACSM1	0.433184	-4.38775	49
CARD10	0.613237	11.9372	49
CNTFR	0.727537	4.38789	49
DEGS2	0.412955	7.02979	49
ETS2	1.12843	7.60144	49
FAM3B	0.884707	-8.60094	49
GAS1	0.517928	11.9924	49
HIPK2	1.03798	8.99617	49
NOS1	0.718493	7.57194	49
PXDNL	0.281139	7.78167	49
SELT	4.4269	-9.56611	49
SLC16A7	0.431079	11.4447	49
SPAG17	0.257115	-3.49954	49
SPEG	0.707119	5.77511	49
SPRTN	1.81035	4.093	49
TSSK4	0.776774	11.982	49
ZGRF1	2.55608	-11.2368	49
ZNF559-ZNF177	1.0552	10.2997	49
ABCC10	0.00297818	4.82938	50
ACSM3	0.222128	-2.77074	50
ADGB	0.766015	1.06203	50
AIFM3	1.16577	8.6473	50
ALG8	0.623879	8.03932	50
CASQ2	0.668397	-13.1209	50
DET1	0.706039	11.6587	50
EVC2	1.94941	0.827302	50
FAM13A	0.206518	6.56515	50
FBXL3	0.821414	11.6847	50
MSANTD2	0.692495	3.79613	50
PPM1E	1.90491	3.23988	50
RAD51B	1.29594	-5.14537	50
REM1	0.676675	11.829	50
SDK1	0.917882	2.64083	50
SYN1	1.131	10.3045	50
TDRD15	1.59079	6.65046	50
TSNARE1	0.254594	5.53731	50
ZNF507	1.03114	-2.58567	50
ADARB2	0.147535	6.91211	51
BUB1B-PAK6	0.00318285	-11.842	51
CACHD1	1.42284	7.51624	51
CETP	1.14034	3.65599	51
CLSPN	1.87963	3.5252	51
DNAI2	1.28418	5.59084	51
FCN3.1	0.5194	10.8246	51
GCH1	0.65294	11.8696	51
HIPK4	1.02412	6.61194	51
KIZ	2.32747	-0.931811	51
KLF5	0.623853	10.3875	51
MREG	0.964498	11.6559	51
NYNRIN	0.557993	5.66904	51
SLC6A1	0.721121	1.94694	51
SPIB	1.77914	4.25342	51
TSPYL4	1.16464	8.23814	51
ZNF222	0.813591	12.0635	51
ZNF396	0.0937074	-6.75362	51
ABCC2	0.685089	10.4276	52
ADAM8	0.733829	11.01	52
BRIP1	0.607226	12.3787	52
CCDC180	0.326544	12.0618	52
CFAP43	1.56724	4.52882	52
ENPP3	0.810383	-4.84851	52
GSG2	0.303092	4.00918	52
ING2	0.401285	10.9136	52
MYOM3	0.451927	-20.768	52
RASSF3	1.05324	9.22962	52
RP1	1.75313	-14.6218	52
RPGR	0.505632	10.7286	52
SWI5	0.191999	3.14103	52
TMEM237	0.922589	9.17828	52
TNFRSF17	1.69717	-6.35355	52
VGLL1	2.08092	-5.27755	52
ZBTB38	0.914087	8.76084	52
ZBTB39	1.25109	5.0672	52
ZDBF2	0.637306	11.9956	52
DNAH3	0.751019	4.07082	53
THEMIS	0.620286	2.01434	53
CPLX2	2.36127	-3.86105	55
KIAA1549	0.854321	-4.46269	55
PCSK9	0.438441	10.5143	55
DNAH6	0.793387	-1.08725	56
KIAA0408	1.66441	-2.11949	56
MYO7B	0.662042	11.9324	56
ABTB1	0.507391	12.3449	57
CEBPA	0.208079	5.90846	57
FAM26F	1.09536	2.87681	57
GIPC2	0.8206	-10.7739	57
GK5	0.546526	7.29306	57
MAN1C1	0.134903	8.11077	57
MYBPC1	0.0704405	-10.5947	57
NRAP	1.12542	8.87189	57
OTUD3	0.114104	8.59733	57
PHLPP1	0.0574382	-17.5121	57
POLH	0.273945	5.37145	57
PPP4R4	0.734184	11.8819	57
RAD51AP2	0.45654	3.77631	57
SCAP	1.20551	-8.52155	57
SIGLEC14	0.764079	10.3738	57
ZNF32	0.74	9.96799	57
ZNF385B	1.02962	4.81315	57
CENPU	0.898085	12.3227	58
DSG1	1.01564	-37.967	58
FAM64A	0.704906	9.35161	58
FAT4	0.522565	-4.99836	58
GAP43	0.499745	12.4043	58
HSD11B2	0.560965	-11.198	58
KIRREL	0.910366	10.583	58
KLK11	0.743938	-17.115	58
METRNL	0.710086	10.674	58
MYT1	1.15718	1.39075	58
PEX26	0.924529	11.9113	58
PLEKHA8	0.666537	12.0098	58
PLEKHG4	0.222307	-4.29756	58
RAD54B	0.952276	12.3195	58
SYNGR1	0.863479	11.5648	58
TESK1	1.27555	10.1496	58
TRIL	0.914737	11.7976	58
UBXN10	1.1882	6.95315	58
B4GALT7	0.974716	6.86464	59
C17orf47	1.10933	6.82492	59
C9orf152	1.37182	7.44147	59
CBFA2T3	1.02416	6.62934	59
CCDC181	0.891931	3.11907	59
COL9A3	0.721936	5.43972	59
CYP2J2	0.918843	11.6815	59
DENND2C	0.178053	10.1209	59
EME1	0.914731	3.42948	59
EN1	1.15921	2.90588	59
FLYWCH1	0.00124673	7.71309	59
FOPNL	1.32065	9.85502	59
FREM2	1.1361	4.50081	59
GDE1	0.576875	12.421	59
GRIN2C	0.73152	11.9929	59
HJURP	0.0895013	-0.00146752	59
HSPB2	0.0665055	-14.3382	59
IPPK	0.121619	0.715425	59
JPH3	0.928336	8.14909	59
KIAA1210	0.34392	12.1703	59
MROH2A	0.610296	12.4966	59
MS4A1	0.826971	-18.4766	59
MSRB1	1.22455	10.5865	59
OVOL2	0.485265	11.6534	59
PPP2R3C	0.0767714	0.96389	59
PTPRU	0.0210369	7.0575	59
SFI1	0.428223	12.3666	59
SNX10	2.01702	1.54529	59
SNX14	0.0680953	6.15436	59
TRIM8	0.404594	10.8607	59
TTBK1	0.448112	7.77225	59
TTLL10	0.399712	7.50842	59
TTLL4	0.35841	0.498647	59
ZC3H3	0.119733	6.99739	59
CEACAM6	0.911736	-14.9421	60
CFAP54	0.502259	9.05779	60
EPHA4	0.961801	12.0686	60
FGFRL1	1.06859	9.71138	60
KCNH3	0.888121	11.921	60
L1CAM	0.849031	8.76471	60
LOXHD1	0.93771	10.7246	60
ODF2L	0.721898	12.7637	60
PIGN	0.699118	5.84281	60
PRDM15	0.858157	-12.1698	60
PRICKLE2	0.74605	9.5242	60
PSD2	0.730796	-0.390605	60
SCN5A	0.976858	11.6068	60
SLC37A4	0.0401162	4.52291	60
SMPD3	1.08718	-24.502	60
SYCP2	1.34926	9.81201	60
TENM1	0.205829	-1.40514	60
THRA	0.485621	11.923	60
WIPF3	0.733858	12.0376	60
ABCA6	0.0666188	5.67119	61
ALG12	1.51709	4.5923	61
BAHCC1	0.541866	-5.00878	61
CGA	1.41837	4.51165	61
DNAJC6	0.940211	10.9765	61
EMB	0.722263	11.5137	61
GABRG2	0.630319	12.7883	61
GZMB	0.868575	11.8886	61
HOXB7	0.923135	1.94047	61
INHBB	0.994689	5.0457	61
NATD1	0.222638	4.09575	61
NEMP1	0.829915	8.86228	61
PLEKHJ1	0.993521	8.64588	61
RILP	0.722894	1.51799	61
RNPEPL1	0.535326	5.31159	61
SEMA7A	0.00433134	4.8861	61
TRIM68	0.480164	12.7351	61
APEX2	0.677316	10.401	62
ENDOV	0.611552	12.9308	62
FABP7	0.706296	4.63276	62
MARVELD1	1.36199	5.80741	62
PTPN4	1.23417	9.77382	62
LAMC3	0.693276	12.6561	63
BCAS4	0.588551	12.162	64
DUOX1	0.52837	11.6488	64
NIM1K	0.267989	7.74769	64
RFX2	0.945519	11.9055	64
SLC12A1	0.918924	9.2066	64
STYXL1	1.81803	0.811014	64
AFF2	0.727842	11.9563	65
APC2	0.0239619	1.95279	65
BMPR2	0.510517	10.0561	65
EXOC3L2	0.846324	12.3461	65
FAM26E	1.34162	-2.39616	65
GLYAT	0.563878	6.3635	65
GNG4	1.26766	-15.2613	65
KLF4	0.57333	12.9971	65
RAB11FIP3	5.45725	-16.2956	65
RTTN	0.0239867	1.11789	65
TCEAL8	0.536225	12.0688	65
UBIAD1	0.781425	11.2179	65
USP29	0.592241	-0.487074	65
ABCB1	1.024	7.11185	66
ABCB5	0.639229	7.003	66
CCDC175	0.560534	12.9532	66
CLDND1	1.08734	10.6856	66
CRY2	1.0695	10.9097	66
E2F6	0.095986	2.13465	66
HHIPL1	0.336191	9.58141	66
JPH1	0.437807	12.8054	66
KITLG	0.616949	13.159	66
MAK	0.417785	13.0141	66
MBOAT1	2.19382	-1.40967	66
MIGA2	1.05205	10.8888	66
MYO18B	0.468674	6.42383	66
NR1D1	0.0819127	9.80746	66
PDE7A	0.683447	6.12184	66
POMZP3	0.945981	-0.483247	66
PRRT3	0.558563	12.9501	66
RSAD2	0.717579	0.324872	66
SLC44A4	0.919122	11.5716	66
SPHK2	2.03671	-9.4751	66
TMEM55A	0.535922	12.4105	66
TNFRSF1A	0.0590693	3.79843	66
TRPM7	0.574241	6.76138	66
ZNF469	0.83784	11.0027	66
AADAT	1.40479	-21.4681	67
ACADL	0.849339	6.7325	67
ADCY3	0.958855	8.54019	67
ANKS3	0.46467	9.88078	67
ATP8B3	0.293734	8.06129	67
CCL16	0.282531	6.75373	67
CNTNAP2	0.557998	4.44574	67
COL28A1	0.992698	11.1457	67
DLEC1	0.181754	-19.2154	67
DNALI1	1.11082	10.2501	67
GNMT	0.664256	-0.312252	67
GP1BA	0.797596	7.53051	67
GPRASP2	0.870283	12.6805	67
IGSF1	0.371613	-16.1432	67
KIF12	0.612867	9.07934	67
KLK14	1.07062	3.97	67
LALBA	0.716548	-18.0778	67
MEGF10	0.0644598	2.8448	67
METTL21A	0.0288868	3.81237	67
NUAK1	0.7884	12.7208	67
NWD2	0.359239	9.00783	67
PGBD2	0.432576	12.6974	67
PTPRCAP	0.609054	4.53095	67
SDHAF1	0.464496	0.944563	67
SLC43A3	0.982457	11.3302	67
SLC9A8	0.713918	10.8312	67
SPA17	0.60689	12.8858	67
SRD5A3	0.336553	8.426	67
TMEM135	0.794513	12.9904	67
TMEM206	0.82835	3.3992	67
WNT2	0.00439256	4.13228	67
ZFP37	0.541058	-16.8071	67
ZNF776	1.78514	5.92624	67
ZNF865	0.81967	-14.7442	67
ADGRL4	0.517604	4.33601	68
ANKRD13C	0.610137	-20.4439	68
BDP1	0.816079	12.7762	68
CDKN1C	0.514095	10.1549	68
CEP95	0.626495	-6.40476	68
FAM218A	0.271212	7.70383	68
FAM46A	0.0146244	-0.814613	68
HLA-DQA2	0.419251	10.2195	68
HMGCR	0.400651	-11.9897	68
HOXD9	1.76556	-0.433076	68
KCTD17	0.682182	10.2302	68
LCOR	0.638069	6.8767	68
NEK5	5.34996	-15.9676	68
NLRC4	1.15076	-4.2492	68
OSMR	0.910517	11.6946	68
PCK1	0.652309	2.11229	68
PEX11A	0.181446	7.88046	68
PRAMEF17	1.88745	1.12777	68
PSCA	0.919329	3.8165	68
SKP2	1.1632	8.05654	68
SLC5A8	0.466047	2.64948	68
SLX4IP	0.519293	4.88135	68
TMEM184B	0.44966	11.4808	68
U2AF1L5	0.112666	-1.37399	68
VSTM2L	0.944729	-5.42578	68
WDR25	0.925199	12.517	68
ZNF275	0.588687	11.469	68
ZNF410	0.86898	9.59088	68
ZNF93	0.67129	2.62455	68
ACCS	0.505363	12.6637	69
ALKBH6	0.11642	8.70848	69
CD3E	0.775747	10.1465	69
CD6	1.12252	11.1866	69
COL6A5	0.937005	-0.0656653	69
LRRC58	0.824355	13.0399	69
MAP3K7	0.606214	10.3665	69
ORAOV1	1.05739	9.94942	69
RHOF	1.39664	2.16088	69
ROBO2	0.594859	2.99375	69
SAPCD2	1.1093	-0.673809	69
SC5D	0.610875	-11.7957	69
SETD6	0.783236	11.5635	69
ZC3H12D	0.729987	12.9382	69
BSCL2	0.626907	12.8048	70
CD3G	0.59025	11.028	70
FAM222B	0.630366	11.8681	70
HPS4	0.432434	3.01599	70
IPCEF1	0.740707	6.00416	70
PER2	0.47971	13.1449	70
SHISA2	1.11301	6.63774	70
CPB1	1.66191	-18.891	71
PALB2	0.556149	11.3102	71
SERPINB3	1.1027	9.88433	71
ZNF213	0.378208	6.71627	71
ADAMTS16	0.431707	11.685	72
AMN1	0.503583	-28.7333	72
B3GNTL1	0.853064	6.41229	72
CCDC14	0.466672	2.4492	72
CSF1	0.909653	10.3751	72
CTTNBP2	0.513038	13.4963	72
GLB1L	0.584397	13.1679	72
RBL1	0.749705	13.0059	72
SLC26A2	0.665208	-11.2353	72
SOX12	0.404736	10.7935	72
SPATA22	0.0381491	0.866274	72
TEX30	0.37617	4.50984	72
ACE2	2.11736	-20.0677	73
ADAM12	0.805262	11.8051	73
AKAP7	0.215587	-24.4055	73
BNIP3L	2.38451	-8.89013	73
CAPN6	0.415799	3.10764	73
CASD1	0.792448	-8.50168	73
CCPG1	0.141472	6.57048	73
ELK3	1.08726	-6.32867	73
IFRD2	1.34433	5.06437	73
IGFN1	0.894095	12.5143	73
KIAA0922	1.38432	-4.57939	73
LARP6	1.00774	11.7511	73
LDB3.1	0.829407	3.79441	73
LEF1	0.451094	-3.12186	73
LRMP	0.501404	3.31895	73
MDM4	0.569457	13.2649	73
MIPOL1	0.184568	7.11182	73
MMACHC	0.654533	10.6547	73
MMS22L	1.93521	1.60779	73
NEBL	0.544219	2.51848	73
PINX1	0.872281	7.08229	73
PLEKHH3	0.530144	12.2983	73
PRIMPOL	0.637035	7.06015	73
S100PBP	0.966648	12.1784	73
SOX5	0.820393	9.92994	73
TCEA2	0.450679	11.8917	73
TDRD1	1.76935	-9.16507	73
TENM2	0.179794	-6.0502	73
TET3	0.818736	4.72001	73
THBD	0.298612	5.53072	73
ZFHX2	0.494622	11.8854	73
ZNF771	0.572554	12.2038	73
ABCA2	0.631074	12.3616	74
ABCC5	1.53477	-14.9929	74
AGMAT	0.49634	10.1029	74
ALG6	0.977265	7.58867	74
B4GALT2	0.655934	8.89828	74
CA9	0.74163	4.57045	74
CCDC141	0.912537	-8.59909	74
CHI3L2	0.713494	12.195	74
CNOT6	0.770553	13.4845	74
DLG1	0.0142243	1.76329	74
DNHD1	0.0935752	6.43707	74
EPB41L4A	0.167342	-1.85363	74
FAM234B	0.413975	12.6431	74
GFAP	0.113326	5.51401	74
IFFO2	0.882636	12.3354	74
LILRB5	0.438423	12.7447	74
MAP7D2	0.0839082	-7.82752	74
MARVELD3	0.219163	-1.97986	74
MOCS1	0.0562857	7.13445	74
MOS	0.496691	12.8819	74
NARR	1.02714	9.81011	74
NGFR	0.905239	10.4144	74
PDK4	0.107548	-3.25717	74
PHF20	0.0053556	4.41843	74
PKHD1	0.736194	13.215	74
PTPRT	0.838752	11.9034	74
SIDT2	0.213413	-1.46195	74
TGDS	1.42596	1.16507	74
TMEM261	0.816445	11.2131	74
XPR1	0.318798	0.196596	74
ZFP3	1.07769	-4.51129	74
ZNF521	0.429556	13.2906	74
ZNF852	1.08246	9.31248	74
ANAPC15	0.350069	9.30063	75
ANKRD36C	0.948555	13.2867	75
ANO5	0.655209	11.0897	75
ASXL3	0.526298	3.68429	75
BRWD3	0.371797	0.880822	75
CCDC125	0.959467	9.03794	75
CCHCR1	0.223845	5.95957	75
CHN2	2.29979	-16.7377	75
DUSP4	0.738603	13.4253	75
EPHA1	0.168289	-0.030123	75
ERN 1.00	0.311764	-10.4893	75
ESRRA	0.174509	-7.1867	75
FAM221A	0.790322	13.1278	75
FAT2	0.780374	13.534	75
GNA15	0.00822975	0.687709	75
GNAS.1	0.0132919	-3.73583	75
KIAA1755	0.208985	3.80013	75
KLK5	0.0154774	-1.54892	75
LILRB3	1.02063	10.2233	75
LPCAT4	0.726827	13.5911	75
LRP5	0.30839	9.92629	75
MTERF1	0.0241562	-12.5609	75
MUC5AC	0.174399	2.66231	75
MYH7B	1.01186	4.80651	75
NECTIN2.1	0.954639	12.6053	75
PAGE2B	0.815234	4.85283	75
PARP16	0.32434	9.52676	75
PEX5	0.465331	13.4015	75
PHKG1	0.939669	7.00311	75
PLA2G7	0.983993	2.42358	75
REV3L	0.724689	13.4522	75
RPGRIP1L	0.687665	13.2325	75
RYR3	0.227722	2.23014	75
SRSF12	1.39094	4.25004	75
TICRR	0.857111	-6.91491	75
TMEM94	0.722295	12.1235	75
VEGFC	0.579226	13.1896	75
C5orf42	0.953474	-6.48717	76
CDC42SE1	0.277462	8.20923	76
CEP152	1.00624	2.99875	76
CTSW	0.830508	13.1114	76
DNAH10	0.121864	2.61403	76
DNAJC30	0.837943	13.1954	76
DUSP16	0.495729	11.3941	76
FAM104A	0.752554	3.8973	76
FBRSL1	0.832508	6.58764	76
GRB14	0.821166	-10.1681	76
HBM	0.967806	-15.9103	76
HBQ1	1.05982	-3.13171	76
IFI6	0.947502	12.8139	76
KCNMA1	0.365774	13.3844	76
LY6D	1.16521	0.918486	76
MOXD1	0.931165	-2.38134	76
NAPEPLD	0.111266	1.83321	76
NPY1R	1.18479	-5.4663	76
OR2AG2	0.507631	-13.1998	76
PIK3R1	0.289156	7.18926	76
PLA2G4C	0.202526	8.11529	76
RHOH	0.421317	5.99093	76
RINL	0.307301	2.5282	76
RNF11	1.14616	7.56036	76
SLC25A17	0.469828	-8.25696	76
STXBP5L	0.532468	13.447	76
SUPT3H	1.85099	-16.1801	76
SUV39H1	0.71216	10.9127	76
SYTL3	0.579271	1.79849	76
TFCP2L1	0.840709	8.09653	76
UFSP1	0.178486	9.75097	76
ABCA12	1.20809	-5.43938	77
DCLRE1C	0.761201	12.7658	77
FAM184A	0.186301	-5.17344	77
GNG11	0.60882	-7.24706	77
INO80D	1.91623	0.877152	77
LY86	0.571666	6.75607	77
MOB3B	0.35137	8.31268	77
PER1	0.744209	12.5863	77
POLM	0.418868	-2.30786	77
ROS1	0.965255	-1.69739	77
SETD9	0.709318	11.649	77
TENM3	1.05708	12.0247	77
TNS4	0.782187	8.85538	77
TOB1	0.0999261	9.81577	77
TTC6	0.647353	13.3633	77
XYLT1	0.600694	12.8458	77
ZKSCAN4	0.748348	12.1325	77
ZNF777	0.500957	11.1165	77
FRMD4B	0.518425	9.76015	78
HIST2H3A	1.35398	6.82929	78
HOXB6	0.612953	3.45807	78
MET	0.629276	1.82997	78
ZFP1	0.729012	13.0163	78
FADS1	0.19778	8.24283	79
ADGRG6	0.85162	11.1729	80
ALPK1	0.925904	12.5663	80
APBA2	1.32632	7.95136	80
ARHGAP22	0.754225	11.8802	80
BRI3BP	1.00766	6.11574	80
CD82	0.680639	12.9984	80
DDR2	1.09406	9.92106	80
FAM3A	0.774913	-10.8399	80
KLHL20	0.249795	-30.4449	80
PPM1M	0.518475	13.674	80
SETD5	0.568199	10.8615	80
SIRT7	0.508001	13.6556	80
SOX6	0.589396	10.5003	80
TRIM72	1.017	-32.2268	80
AAED1	1.92803	-6.41072	81
ATXN7L2	0.897697	6.73624	81
C1orf43	0.829372	13.5669	81
CCDC85B	0.215492	2.82339	81
DALRD3	0.490169	11.6769	81
DCAF8L2	0.865922	11.327	81
DPH3	0.941592	12.3744	81
EXO1	0.634827	11.8106	81
JAG1	0.174537	-3.63932	81
KCNU1	0.469018	13.5164	81
KIAA0232	0.712595	12.7886	81
KLHL42	0.572956	12.8433	81
LRP6	0.101414	-7.06491	81
MAGEC1	2.03221	-10.1467	81
MBTD1	0.541523	13.4788	81
MBTPS1	0.987457	-7.31789	81
MFHAS1	0.59537	13.8503	81
MLF 1.00	0.619947	11.119	81
PCDH7	0.691949	13.55	81
PTCD2	0.489548	13.4669	81
PTPDC1	0.0788216	3.07666	81
RAD23A.1	0.559645	13.4163	81
SCARF1	0.463935	4.60453	81
SERINC3	0.0157394	2.2816	81
SLC9A9	0.460051	0.568492	81
SYNPO2L	0.662218	12.5489	81
WDR62	0.764746	10.0255	81
ZNF688	0.222518	1.95964	81
ABHD13	0.060797	-22.4108	82
ABLIM3.1	0.879581	12.6603	82
ADHFE1	0.824274	-1.2849	82
ATP8A1	0.454753	13.6724	82
C19orf12	0.850484	12.1723	82
C5orf15	0.644281	8.51287	82
CCSAP	1.69653	-13.5218	82
CDC25C	0.728719	9.46007	82
CEBPD	0.671801	12.9677	82
CSMD3	0.707039	13.9021	82
CXorf57	0.167901	6.89114	82
DEDD	0.476787	9.88146	82
DNAH8	1.27065	9.13635	82
DPF3	0.103244	4.8249	82
ENPP5	0.658953	9.13224	82
EPM2A	0.782312	12.3144	82
ERRFI1	0.678609	13.8089	82
ESCO1	1.06617	10.6675	82
FAM174B	0.833189	11.855	82
FAM89A	0.987401	12.0383	82
FRS2	0.316166	13.3667	82
GHITM	0.612585	4.03748	82
JTB	0.799808	13.8493	82
KRT35	0.658021	5.51346	82
KSR2	0.14698	7.79851	82
LETMD1	0.129678	2.01811	82
LNX1	1.41755	7.11293	82
LNX2	0.548218	10.0827	82
LRRN3	1.03898	11.5993	82
MANEA	0.0670001	2.08503	82
MOB3C	1.03439	9.29406	82
MUTYH	1.07907	11.0204	82
P4HA3	0.632756	13.6176	82
PANK1	0.818524	-2.53	82
PCNX3	0.343489	-7.05246	82
PDE4DIP.1	0.381307	-7.13529	82
PLSCR3	0.948531	-4.85948	82
POLE2	2.22437	-0.154672	82
PPP1R35	0.399646	5.30124	82
SCNM1	0.881868	7.73026	82
SESN1	0.517156	5.86606	82
SGIP1	0.922628	9.88396	82
SH3TC1	0.827651	1.55997	82
SLC1A1	0.515581	-1.76196	82
SMDT1	0.895957	12.5255	82
STYX	0.630675	-1.75701	82
TLL2	0.988134	5.85787	82
TMCC3	0.147629	-1.61875	82
TMEM223	1.225	8.99079	82
TOMM5.1	0.510265	8.27855	82
TOR4A	0.687812	13.6634	82
TTN.2	1.6987	-7.38746	82
VNN 1.00	0.54291	12.7203	82
ZNF324	0.0327833	-10.1645	82
ZNF580	0.329751	4.13101	82
ABHD6	0.547933	-0.309861	83
ACTA1	0.53457	14.2478	83
ADCY7	0.484096	12.0377	83
APOBEC3A_B	1.0422	0.979855	83
C2orf68	0.378969	12.8828	83
CAPN9	1.16884	-18.669	83
CCDC150	1.42673	9.10213	83
CD320	0.863037	7.35824	83
CEP83	0.588244	-21.3663	83
CHPT1	0.770726	10.1949	83
ENTPD2	0.651801	13.5755	83
EPDR1	0.188939	3.61403	83
EVA1B	1.20796	8.67502	83
F3	0.579861	10.4882	83
FBXO46	0.587957	12.3149	83
FMO3	0.475312	-15.5574	83
GNPTAB	0.417753	13.552	83
KLHL15	0.848538	13.3879	83
2024-03-06	1.21502	8.02041	83
MCUB	0.785804	13.3767	83
MMP8	0.799891	-20.6758	83
MPP2	0.289224	-3.72056	83
MTRF1	0.460291	13.6734	83
N4BP2L1	0.415072	5.13563	83
PDSS1	0.117536	-0.460729	83
POP5	0.632167	10.556	83
PSMC3IP	0.65276	13.0652	83
RFESD	0.470889	-7.04553	83
SERPINB2	0.723557	-19.1522	83
SFR1	0.744316	13.9372	83
SSX2IP	1.27251	8.1634	83
ST7	0.846658	4.82546	83
STK19	0.488609	13.7224	83
TOPORS	0.167142	-22.354	83
TUBB8	0.669926	3.12532	83
WDR90	0.811478	13.7289	83
ZBTB41	0.0980366	8.4146	83
ZNF282	0.505593	13.7073	83
ZNF540	0.206696	-7.11227	83
ZNF628	0.386062	6.37017	83
ZSCAN21	0.840878	1.09106	83
AMDHD1	0.517481	-12.5252	84
CARMIL2	1.19384	6.77687	84
CD207	0.4882	-14.6796	84
CDK8	0.828743	13.5519	84
CNTLN	0.462264	13.7333	84
CST5	0.75889	-10.5059	84
FBXL19	0.993116	12.5708	84
IKZF1	0.576986	5.80723	84
LRRC25	0.719851	13.0798	84
MUC19	0.0553407	8.92428	84
NRK	0.463349	13.687	84
OGDH	1.3288	4.88254	84
PCGF1	0.247027	10.304	84
PDE4A	0.466012	11.295	84
PPT2	1.0509	5.17048	84
RANBP17	0.250803	3.41942	84
REXO1	0.131166	-13.4183	84
RNF13	0.587579	13.6615	84
S100A7A	0.891888	2.393	84
SCD5	0.749302	6.78625	84
SLC25A36	0.669568	13.5744	84
STAC2	0.492007	-4.04943	84
TGFBR1	0.675021	8.5924	84
TUBB4A	0.549275	1.4292	84
VEGFA	0.0768178	2.85878	84
ZNF615	0.427792	12.5195	84
APITD1-CORT	0.471912	-3.86699	85
ARHGEF38	1.03113	10.8872	85
DNAH1	0.887203	9.8022	85
DNM3	0.0959569	7.84611	85
ENOX1	0.809557	4.1575	85
FAAH2	0.682818	12.1591	85
ICK	0.542466	13.7175	85
LURAP1L	1.15185	10.0412	85
MARK4	0.141287	5.40923	85
RAB44	0.598614	-7.14507	85
TLE4	0.536946	11.8149	85
ZCCHC7	0.652209	11.7516	85
CHST15	0.742882	13.9197	86
FCHO1	0.0594516	5.50146	86
ZFR2	0.627729	13.9817	86
PROSER1	0.133369	-14.2772	87
SCUBE1	0.367637	13.1909	87
UNC13A	0.0695704	7.91906	87
ZNF197	0.164946	-4.18427	87
ATF6	0.267903	1.01382	88
DMPK	0.550352	-6.35338	88
FABP7.1	0.740912	4.18131	88
FLG	0.605399	7.03255	88
HIST1H1T	0.944604	-8.16757	88
KRT20	0.701969	-32.1032	88
MUC2	1.29999	-22.8156	88
NAV3	1.19817	-26.4378	88
NEFH	0.958942	3.04409	88
PAPPA	1.04117	12.9736	88
PCP4L1	1.0791	1.02022	88
RTN2.1	0.855564	4.63063	88
ZFP90	0.499392	13.0777	88
ADGRL1	1.07731	13.0544	89
AP4S1	0.776918	14.3735	89
ASPA	0.870428	5.90788	89
C1QTNF6	0.663814	10.7351	89
CCDC151	1.19959	9.7494	89
CCDC18	1.24251	5.14915	89
CSPP1	0.378607	10.9355	89
CST4	0.323261	-11.3274	89
DNAJC16	0.652615	11.2369	89
DXO	0.647666	-14.0067	89
DYRK1B	0.785733	-0.0367591	89
EPHB2	0.630259	12.3539	89
FAM105A	0.510162	13.7751	89
GTF2IRD1	0.410021	-6.01278	89
HEXDC	0.415717	13.1117	89
HIVEP2	0.636768	14.1237	89
HLA-DQB1.1	0.553607	0.541576	89
INTS6L	0.778971	11.824	89
JMJD8	0.701329	13.8787	89
KIAA1683	0.707139	10.7159	89
MON1A	0.764631	9.89242	89
NHS	0.773389	6.26976	89
OMA1	0.415556	13.8326	89
PITX1	0.760021	13.7735	89
RAB38	0.221307	9.32065	89
RAPH1	0.344714	-5.08193	89
RHBDD1	0.591109	12.5263	89
SFMBT1	0.208894	9.46022	89
SLC12A8	0.406298	8.35637	89
SLC25A46	0.674916	13.2585	89
SLC9A7	0.895819	13.2923	89
SLITRK6	0.56129	9.29798	89
SNAPC3	0.305425	6.49832	89
SNX13	0.144057	0.348448	89
TBC1D25	0.301566	4.77699	89
TMEM63C	0.682854	13.1814	89
TRDMT1	0.822216	12.0423	89
TSPAN8	1.7011	-33.6819	89
VASH1	0.0266589	7.04563	89
ZCCHC2	0.683755	8.86396	89
ZNF597	0.79312	9.12696	89
ACVR1	0.734575	14.3482	90
ADGRV1	0.533218	13.9449	90
ARNT2	0.756947	-2.89087	90
AXL	0.934841	12.5894	90
BCL11A	2.12803	-7.26536	90
C1orf167	0.682036	14.0646	90
C22orf29	0.933926	-7.07179	90
C2orf16	0.489257	8.88605	90
C4orf3	1.00988	7.07572	90
C4orf3.1	0.794299	3.97075	90
CCDC146	1.20358	11.1485	90
CEP63	0.479624	12.6372	90
CHD5	0.347066	1.7658	90
CHST3	0.563252	13.9746	90
CLK1	0.445237	10.3583	90
COL17A1	0.741016	8.48787	90
CYP4Z1	1.16333	-25.6851	90
DCAF15	0.83021	6.80177	90
DNAH11	0.530779	12.2418	90
DPH7	1.20493	8.90559	90
EBF1	0.0279019	2.7613	90
ECE2	0.371459	3.29672	90
ETAA1	0.0435651	-0.733572	90
FAM173A	0.699757	10.2882	90
GEN1	0.512536	9.45604	90
HDAC11	0.83456	13.1761	90
HLA-DMA	1.06254	12.7127	90
ICMT	0.683152	13.6403	90
IFIT1B	0.104574	7.68895	90
ITGB8	0.771661	13.7151	90
KCNB1	1.0999	-6.67551	90
KIAA1551	0.277533	13.6942	90
MAFB	0.619186	-16.3565	90
2024-03-05	0.163233	-4.46582	90
MDM1	0.0788892	4.70604	90
MLH3	0.713667	12.9257	90
MNS1	0.83386	14.0471	90
MSX2	0.483226	12.9745	90
NRIP2	0.844975	4.14362	90
PDCD7	0.494488	-28.3749	90
PLEK2	0.635293	9.98567	90
PLPP3	0.523156	10.5177	90
POLR3G	0.9614	12.9467	90
RBMY1D	1.1134	1.2775	90
RBPMS2	0.0292245	1.41933	90
RHOBTB3	0.561696	3.42128	90
RNF139	0.397124	5.69855	90
RNF170	0.459112	1.49592	90
RTEL1	0.0603801	0.597336	90
SKA1	1.15717	5.37367	90
SLC25A16	0.308384	7.31232	90
SLC26A6	0.883397	12.1257	90
SLCO2A1	0.487811	13.8705	90
SPOCD1	0.0434669	-0.195166	90
SPTBN5	0.164105	-2.10748	90
SUGCT	0.658522	13.8219	90
TLR2	0.760956	13.7176	90
TRMT44	0.0555826	0.443542	90
U2SURP	0.621576	8.30324	90
USP20	0.0213342	-12.236	90
USP38	0.491382	13.832	90
VDR	0.785917	13.7656	90
WDYHV1	0.348908	13.6026	90
ZBTB17	0.271093	-0.362949	90
ADAMTSL1	1.39391	7.70994	91
ADCY9	0.524507	13.8966	91
APOC4	0.829769	9.00169	91
ARHGAP44	0.151669	6.36273	91
ARL6IP6	1.10108	11.4944	91
ARMCX4	0.699912	11.9995	91
ATP13A2	0.54471	13.3036	91
C11orf57	0.994652	8.93476	91
CDPF1	0.0968863	6.24587	91
CHGA	0.794375	0.378968	91
COA1	0.567462	12.8666	91
CTDSP1	0.538471	14.2573	91
CXCL10	0.679291	13.9962	91
DOPEY1	0.100171	-7.954	91
DPF1	0.0814675	-11.2485	91
EPB41.1	0.780815	-2.07061	91
FHAD1	0.75154	10.6899	91
FHL5	0.920979	-4.99844	91
FILIP1	0.687776	9.00337	91
GEM	0.721964	12.4824	91
GTF2IRD2B	0.637305	13.3621	91
GUCY1A2	0.458092	5.52013	91
GYG2	0.928448	13.4751	91
HYDIN	0.406552	9.5059	91
IGFLR1	0.44447	13.9262	91
LAMB4	0.704869	3.26086	91
LCMT2	0.874146	13.9433	91
LRRC8D	0.816038	9.94952	91
METTL8	0.877669	13.7828	91
MIER3	0.622372	13.4158	91
MTCH2.1	1.04705	12.9253	91
NUFIP1	6.59423	-24.6353	91
ORC1	0.163415	4.01091	91
PCSK1	0.957107	-35.7425	91
PIGX	0.844732	11.1155	91
POLL	0.09328	8.44517	91
PPP1R12C.1	0.290784	-2.6712	91
PRF1	0.779129	12.5363	91
PUSL1	0.115682	3.8102	91
RAD51C	1.00974	12.3499	91
RFT1	0.787309	13.7207	91
RHCE	0.981234	-15.2593	91
SEC14L3	0.745256	13.7887	91
SH2D3A	0.184928	-4.4492	91
SIMC1	0.00744187	5.10525	91
SREBF1	0.280607	10.9138	91
SUCO	0.864564	9.3394	91
TAF11	9.87726	-55.7627	91
TCTEX1D2	0.39092	9.20343	91
TMEM41B	0.655632	12.8004	91
TYROBP	0.618512	13.9051	91
USP42	1.08925	11.0907	91
USP53	0.211965	-8.05857	91
WLS	0.816859	-1.13547	91
ZBED6	0.556522	-0.855228	91
ZNF524	0.529556	14.1676	91
ABTB2	0.749699	4.05944	92
ACTN3	0.377388	-4.09209	92
ANK2	0.592207	13.1176	92
APBB1	0.18708	7.31055	92
BRCA1	0.549868	13.3199	92
C2orf72	0.3671	12.5355	92
CFAP58	0.234508	-0.105404	92
COLGALT2	0.927863	12.9031	92
E2F5	0.76235	14.3628	92
EXT1	0.419041	7.9366	92
FBXL4	0.239585	3.00675	92
GRK3	1.01226	12.5817	92
HEPH	0.752389	14.1339	92
HNRNPC	0.67072	-25.5642	92
IQCJ-SCHIP1	0.602185	13.2261	92
JMJD4	0.467903	7.7564	92
KIAA1324L	0.238379	9.55068	92
KLHL5	0.479411	10.5414	92
KMO	0.714265	6.02893	92
MAGED4	0.31922	8.71665	92
MAML2	0.777473	11.9629	92
MLLT3	0.84293	12.0867	92
MTRF1L	0.358439	4.33477	92
PHF8	1.14095	8.10559	92
PLEKHB2	0.429706	13.7113	92
PLEKHG5	0.0149674	3.66949	92
RALGPS1	0.819203	0.390495	92
RASGRF2	1.63759	-1.19187	92
RASSF8	1.03704	5.32767	92
RBM41	0.540716	13.714	92
RNASE6	1.1954	9.1809	92
RSAD1	0.0934696	-7.07081	92
S100A3	0.792463	6.37734	92
SLC15A4	0.666874	-6.88691	92
SULT1C2	0.831386	8.13619	92
TMEM177	0.0204385	7.68219	92
UBE2W	0.585012	13.2236	92
UBXN2A	0.96507	10.5814	92
WHAMM	0.49743	12.0783	92
ACD	0.668809	13.7556	93
ATP6V0A4	0.4345	10.3746	93
B9D1	0.943108	12.9003	93
C10orf12	0.594297	13.5847	93
CBX7	1.01724	12.9792	93
CCDC137	0.650979	11.83	93
CD177	0.0921926	4.89587	93
CD79A	1.05733	4.46324	93
CITED2	0.197079	0.0991882	93
CLK2	0.935153	13.9308	93
COX15	0.74214	9.09315	93
GMEB1	1.20841	10.5024	93
KCTD14	0.331197	4.47515	93
MLLT10	0.631582	13.1409	93
MYH7	0.729233	8.47184	93
PCDHGC3	0.379039	8.41208	93
PLCD4	0.772385	12.1664	93
SLC34A2	0.670492	8.70946	93
SVBP	0.719469	3.45291	93
TMEM141	0.583932	12.2402	93
TMEM26	1.1411	7.51621	93
ZMYM6	1.27656	6.44301	93
ZNF654	1.00339	2.39287	93
ZNF746	0.273329	-34.1203	93
ZNF804B	0.585069	14.0841	93
ADCY5	1.05044	12.1208	94
C9orf72	0.553073	-0.332579	94
CERS5	0.93499	10.9026	94
FAM65B	0.521612	14.2732	94
SDCBP2	0.411421	-5.79169	94
TXNDC11	0.799265	13.8645	94
BNIP3	0.396848	13.9212	95
BSN	0.919042	13.4458	95
KMT5C	0.268562	2.98099	95
PTK6	0.524112	12.252	95
SOX10	2.10111	-13.4988	95
CAST	1.59785	-2.23831	96
DNAJB9	0.440035	9.75491	96
FSTL3	1.29705	6.97824	96
NUPR1	0.826169	11.672	96
PPP1R14C	1.27933	0.846917	96
SP6	0.322989	-7.01094	96
ABCG1	0.669046	13.2893	97
ADAMTS1	0.531383	13.845	97
ADAMTSL3	0.834605	-5.16569	97
ADCK5	0.350254	-12.2902	97
AMZ2	0.0360013	4.936	97
ANXA8	0.533027	-1.73599	97
ARL4C	0.292736	9.97183	97
BICDL2	0.125596	7.47084	97
BTBD16	0.181525	-15.5196	97
C10orf2	0.0763441	-10.4427	97
CAMK2B	0.550868	12.181	97
CDCA7L	0.722718	14.0361	97
CEP89	0.59354	-55.0318	97
DCAF16	0.422917	-0.0205837	97
DCD	0.834071	-26.332	97
DCX	0.413282	12.6767	97
DFFA.1	0.402181	11.0136	97
FASTKD1	0.280477	7.30923	97
GPR180	0.717379	14.5692	97
GRAMD3	0.0540874	2.79214	97
KLC1	0.00541084	4.91329	97
KLHL12	0.282191	7.90068	97
LCK	0.946741	13.4277	97
LOC391322	0.103244	3.52587	97
LRRC8E	0.682357	14.8118	97
MEF2C	0.110469	5.94563	97
MXI1	0.835691	13.8222	97
MYH10	0.512491	11.8148	97
NFASC	0.809278	8.26655	97
PDE6C	0.156427	8.13165	97
PHACTR1	0.71529	11.2705	97
PLEKHD1	0.499156	10.9686	97
RASGRF1	1.16174	6.80013	97
RASSF7	1.00805	-1.10204	97
USP18	0.900042	-0.96433	97
YIF1B	0.050192	9.91853	97
ZNF444	0.423412	8.24704	97
ZNF672	0.32126	4.24498	97
ZNF827	0.024785	3.56683	97
ZXDC	1.04342	11.7368	97
ACPP	0.603169	-1.20649	98
ADAM15	0.4484	9.68059	98
ARHGAP42	0.421115	14.3982	98
ARMCX5	0.276629	1.75972	98
ATXN7L3	0.505151	13.264	98
BTN2A1	1.09936	7.08542	98
C12orf75	0.637612	10.4512	98
C18orf63	0.322149	7.00653	98
C1orf109	0.293501	1.64856	98
CAMK2G	0.519199	-5.21753	98
CENPM	0.663334	1.25116	98
CENPQ	0.820087	14.2017	98
CHPF2	0.0605904	5.36817	98
CMTM4	0.807398	13.7374	98
COMMD3	0.332532	-7.38441	98
CREB3L4	0.976168	12.5242	98
CRYBB1	0.514845	14.1626	98
CTC1	0.438253	0.467918	98
DEFA4	0.30722	-7.2916	98
DHDDS	0.317427	7.99712	98
DSG3	0.64137	-15.5299	98
DTD2	0.197855	0.351014	98
DUSP14	0.499047	14.2115	98
ERICH6B	0.420007	6.03909	98
FAM204A	0.0376067	-12.9361	98
FAM63B	0.85299	12.1141	98
FBN2	0.380652	0.177245	98
FBXL12	0.683373	13.3764	98
FCF1	0.570682	14.6249	98
FOXG1	0.395765	0.0656451	98
FOXJ1	0.0830083	-0.634462	98
FOXN1	0.185425	-2.26036	98
FOXP1	0.104483	-0.451345	98
GCAT	0.621408	8.60291	98
GGT7	0.473835	13.7951	98
GID4	0.241966	8.00859	98
GRTP1	1.07291	11.0827	98
HEG1	0.478384	-0.525142	98
HOXC10	1.09386	12.1453	98
HSPB7	0.805705	-9.99124	98
KCTD20	0.138502	-9.11187	98
KLHL25	0.0887451	8.56194	98
KRT40	0.546471	14.4201	98
KY	0.0912866	8.79454	98
MALSU1	0.573583	14.6983	98
MAP2K5	0.176605	-13.2461	98
MDP1	0.636475	13.1705	98
MEX3C	0.761658	4.33577	98
PDGFC	0.715466	9.2019	98
PIGB	0.785751	14.1102	98
POMGNT1	0.936334	13.8427	98
POMGNT2	0.541825	14.2284	98
QPCT	0.791219	12.8692	98
RBM18	0.310626	9.77016	98
RECK	0.972393	10.1889	98
REV1	0.413338	8.94985	98
RGN	0.395357	14.2996	98
RNF167	0.220283	-3.69319	98
RPS15.1	0.775778	-33.2134	98
RYR1	0.139525	-1.61835	98
SALL2	0.685548	10.943	98
SCARF2	0.914083	13.7611	98
SCLT1	0.168169	0.986939	98
SEC14L4	0.727729	-10.6465	98
SLC35B3	0.732942	13.5636	98
SMIM19	7.24801	-31.4837	98
SNRK	0.308653	-19.1503	98
SYT1	0.267085	-13.9543	98
TENM4	0.883626	13.4412	98
TFAP2E	0.877117	13.0959	98
TG	0.767638	-7.31599	98
TLR3	1.11361	7.88179	98
TMSB4Y	0.0440861	3.96301	98
TRPM2	0.610179	-11.9582	98
TTC31	0.474368	0.699536	98
YPEL2	1.54207	-32.9038	98
ZBBX	0.200681	5.88401	98
ZKSCAN5	0.563441	12.0689	98
ZNF236	0.541636	12.4886	98
ZNF264	0.388944	12.8184	98
ZNF581	0.340133	14.1185	98
ZNF623	0.950165	12.912	98
ZNF664-FAM101A	1.40832	7.26418	98
ZNHIT3	0.907695	13.398	98
ABHD17A	0.917561	13.2364	99
ADAMDEC1	0.096548	-9.07454	99
AGO4	0.417069	13.8807	99
AMMECR1	0.6838	13.0049	99
AP1B1	0.910263	14.0282	99
ARHGAP23	0.539689	10.8492	99
ASAP2	0.973295	12.6628	99
BPIFB2	0.551557	8.70243	99
C10orf88	0.0552295	8.24401	99
C2CD2	0.524216	10.9022	99
C5orf30	0.863108	12.8162	99
C6orf89	0.172628	3.5198	99
CDH2	0.260939	-6.98643	99
CHIT1	0.693431	3.92732	99
COL27A1	0.277231	10.3263	99
COL9A1	0.34809	1.49014	99
DDX54.1	0.684724	14.2738	99
DMWD	0.433955	14.1428	99
DNAJC21	0.719458	9.6078	99
DNM2.1	0.489302	14.1668	99
E4F1	0.222418	8.19655	99
EIF2AK3	1.32786	5.44744	99
EMC9	1.15282	-0.600158	99
EXOG	0.651935	2.81921	99
EYS	0.397829	13.713	99
FAM109B	0.603328	11.9975	99
GRPEL2	0.981314	12.7219	99
HBE1	0.498346	11.8432	99
HERPUD1	0.124028	10.3376	99
HMGXB3	0.663652	12.381	99
HOXB4	0.644548	4.35512	99
HRNR	0.528476	6.46237	99
HVCN1	0.886091	11.0115	99
IGF1	0.438638	14.1851	99
KIAA1161	0.210528	-9.43619	99
KIF3C	1.00293	3.37847	99
KIF4B	0.417309	14.0647	99
LRCH4.1	0.625056	12.2676	99
MAML1	0.596354	3.82049	99
MARK1	0.430113	11.6776	99
MARVELD2	1.2086	9.61675	99
MID2	0.595221	11.3153	99
MS4A6A	1.05528	11.5906	99
MT-ND5	0.532324	14.0912	99
MTMR7	0.201507	1.5598	99
MUSK	0.420452	11.8196	99
PABPC1L	0.851071	-7.54678	99
PAIP2B	0.476576	14.2204	99
PKD1	0.0258695	-8.4639	99
PLEKHH1	0.577874	14.0564	99
PLEKHJ1.1	1.07361	12.1623	99
PRMT2	0.141416	9.85046	99
PTBP3	0.126997	9.55494	99
PWWP2B	0.126251	-6.15142	99
RAP1GDS1.1	0.105345	4.97328	99
RBAK	0.668792	-5.22745	99
RCBTB2	0.805803	11.5938	99
RFFL	0.0207047	-6.77245	99
RNF168	0.347622	13.5539	99
SDHAF4	0.971062	3.08079	99
SLC43A2	0.0266688	2.26744	99
SLC9A3R2.1	0.504052	-2.19074	99
SMPD2	0.618259	14.1772	99
SOCS6	0.580515	13.288	99
SPN	0.710344	7.90057	99
SREK1IP1	0.612927	14.1601	99
STK16	0.297694	6.63108	99
STK35	0.411224	12.5904	99
STX2	0.361612	-0.393622	99
TBC1D31	0.0072836	3.96462	99
TESK2	1.20514	10.714	99
TFPT	0.54461	9.0523	99
TM7SF2	0.467236	14.322	99
TOR1AIP2.1	0.595393	14.3594	99
UBE2E3	0.694722	14.2077	99
WNK4	0.740034	10.1665	99
XXYLT1	0.673213	12.5783	99
ZC3H10	0.337882	13.801	99
ZFP82	0.110651	5.34436	99
ZFYVE27	0.81908	7.15728	99
ZG16B	0.646027	-14.8976	99
ZMAT5	0.00771259	5.97304	99
ZMYM3	1.09228	-4.1249	99
ZNF250	0.0864794	1.45272	99
ZNF33A	0.632423	8.30657	99
ZNF503	0.841449	13.959	99
ZNF639	0.709426	1.97947	99
ZNF76	0.929145	12.8619	99
BTN3A1	0.994348	12.6698	100
CD209	0.472021	3.29673	100
CHL1	0.861671	13.0447	100
CSN3	0.0184504	-13.3414	100
DNAJA3	0.41607	13.9036	100
FABP6	1.06136	5.93752	100
GLRX2	0.841284	12.8911	100
GLT8D2	0.553928	10.787	100
GTDC1	0.112483	-5.78153	100
MPLKIP	0.448199	-6.8767	100
MTHFSD.1	0.177717	-8.58949	100
NFKBIL1	0.00749639	-12.4665	100
PATZ1	0.415044	12.7933	100
PODNL1	0.693541	-0.961003	100
RAB3B	0.487095	6.05741	100
RASGRP2	0.889131	9.15408	100
SESN3	0.300374	2.48889	100
SHANK1	0.669302	13.5303	100
SLC25A23	0.167254	2.60987	100
SLX4	0.430383	10.1414	100
SP140	0.582599	14.2791	100
SPTLC3	0.66859	-20.6481	100
STAG3	0.641264	13.5314	100
THUMPD2	0.662276	13.6383	100
USMG5	0.948084	13.2829	100
VWA2	0.50061	11.1304	100
ANGPT2	0.253983	-8.81223	101
ANTXR2	0.47997	7.55375	101
BCORL1	0.169572	8.84439	101
C19orf54	0.508402	-5.41516	101
CCDC7	0.183412	10.5043	101
CCNYL1	0.0675922	-7.31735	101
CDCA8	0.978529	2.77106	101
FAM83D	0.581478	12.1988	101
FOXC1	1.10813	3.93269	101
IQCB1	1.22101	6.97649	101
JOSD2	0.6741	14.0228	101
LFNG	1.0033	5.39998	101
MADD	0.716374	7.86254	101
MHF2	0.814603	13.4309	101
MIGA1	0.198816	9.19382	101
MTMR11	0.524428	13.1259	101
NDUFC1	0.00815824	-4.41723	101
NEK3	0.21174	-14.8571	101
NOL12	0.554323	-23.8829	101
PET117	0.51326	14.1894	101
PGLYRP1	0.764185	-10.751	101
PIGH	0.704672	14.2196	101
PSMF1.1	0.876277	11.0526	101
R3HDM4	0.672436	13.8673	101
RHOA.1	0.198969	-13.97	101
SEC31B	0.194888	-18.0964	101
SERPINB10	0.288609	7.18461	101
TSTD2	0.63272	14.3382	101
GZMH	0.52495	5.29829	102
IDO1	1.21155	3.46738	102
HLA-A	1.92398	-13.62	103
KLHL6	1.41175	4.36151	103
MLK4	0.888186	-30.5112	103
RNASE3	0.579329	6.77963	103
SLITRK2	1.2515	6.52081	103
SLITRK5	1.12	9.94034	103
TUBB2B	0.749051	11.1412	103
ABI1	0.862713	-0.414896	104
CLEC3A	1.20426	-16.571	104
DZIP3	0.1427	-4.58571	104
GOLGB1.1	0.852586	13.4417	104
LDB3	0.286265	-2.32071	104
MAML3	0.302398	-6.12387	104
NDUFA4L2	0.79741	-38.8004	104
PRG3	0.697034	1.99175	104
PRKCQ	0.39172	0.033825	104
PTPRG	0.766781	6.62291	104
RNF4	1.67675	-14.4891	104
SLITRK1	1.19175	5.02099	104
SYNE3	0.512074	5.0091	104
TMEM161A	0.842451	14.059	104
ACOT2	1.02505	12.5588	105
ALAS1	0.766723	3.08978	105
ALDH3B1	0.205516	5.61226	105
ARHGAP28	0.193624	6.38635	105
ATP11A	0.0033427	-7.92917	105
ATP6V1C2	0.147323	4.67209	105
ATRAID	0.612669	11.419	105
C1orf56	0.561797	14.2101	105
CACNA1F	0.686667	10.7925	105
CCDC13	0.52388	14.3078	105
CD84	0.0899025	-15.0734	105
CEP164	0.393909	14.2764	105
CILP2	0.975959	9.84389	105
CNKSR3	0.407081	13.5397	105
COCH	0.834761	-4.80163	105
COL24A1	0.455389	10.0606	105
CST6	0.990728	-5.21469	105
CYP7B1	0.115047	6.85374	105
EPX	0.41288	7.85584	105
ESAM	0.321487	11.4027	105
GLMP	6.58102	-25.4002	105
HMMR	0.366235	14.0635	105
HPGD	0.785167	-48.6343	105
IRAK3	0.659681	-6.82755	105
ITGAD	0.444298	9.65186	105
LILRB4	0.538006	7.1134	105
LMO4	1.25164	7.55183	105
MRAS	0.761532	1.45622	105
MUM1	0.836857	13.2085	105
MYO3B	0.524894	9.53204	105
NCS1	0.848732	13.7958	105
PCP2	0.933949	8.72509	105
PDZD2	0.846973	12.1221	105
PIGQ	0.619823	14.6424	105
PLD1	0.928728	12.6956	105
PNMA2	0.590748	13.0015	105
PRPH	0.319243	5.78653	105
PSEN1	0.654761	-0.104306	105
RBM23	1.0281	-10.0738	105
RWDD2B	1.30534	7.25341	105
RYR2	0.0734034	-2.5506	105
SCGN	0.833356	-27.9054	105
SERPINF1.1	0.57224	14.5398	105
SS18L2	1.17134	10.051	105
STIM2	0.029097	5.15185	105
STK17A	0.299	-5.48383	105
TAT	0.455287	5.06567	105
TBC1D14	0.61124	-28.623	105
TMEM19	1.22462	8.53596	105
TNFRSF12A	0.441214	1.19148	105
TNS1	0.142906	7.17281	105
TRPC5	1.11649	0.367859	105
TXNDC16	0.619253	14.4733	105
U2AF1L4	0.126796	-1.41885	105
UTP14C	0.728987	14.4236	105
VLDLR	5.81929	-19.0332	105
WRB-SH3BGR	0.173769	11.5128	105
ZSCAN31	0.494694	-5.80469	105
ABCA3	0.246172	2.56435	106
ABCC4	0.626593	14.8209	106
ACAP3	0.609275	14.9643	106
ADAL	1.21962	10.0215	106
ADAT2	1.01325	11.4948	106
ADNP2	0.564016	3.63369	106
AFF1	0.595886	11.9453	106
ANAPC11	0.52817	14.9208	106
ANKRD30B	0.34962	-0.00809717	106
ANO8	0.805935	12.0115	106
APLF	0.887383	1.14197	106
APPBP2	0.506555	13.8283	106
ARAP2	0.175947	3.59014	106
ASNSD1	0.549582	7.20581	106
BAHD1	0.205713	-11.1564	106
BAZ2B	0.321728	-3.63105	106
BIRC5	1.2734	-0.970575	106
BRDT	0.168432	-14.1469	106
BST1	0.752479	11.8604	106
BTBD9	0.471291	-1.2244	106
C12orf66	0.109102	1.49715	106
C2CD3	0.465738	13.8242	106
CD58	0.957044	7.09093	106
CDCA2	0.755146	0.376181	106
CDCA5	0.628146	13.9842	106
CDKL2	0.371992	-3.39774	106
CEMIP	0.772574	3.79201	106
CENPJ	0.752783	12.7682	106
CEP170B.1	0.597963	-7.56568	106
CHTF8	0.505087	14.1848	106
CLCA2	1.54634	-22.1373	106
CLEC14A	0.257065	-3.02642	106
CLOCK	0.130221	0.886216	106
CNTN1	0.444503	13.3509	106
DEF8	0.204443	-2.49561	106
DGKB	0.720224	14.4703	106
DYNC2LI1	1.21341	9.43473	106
EEPD1	0.605614	14.3338	106
EPB41L1.2	0.759862	9.91419	106
ERCC8	0.0186027	8.70373	106
FAM234A	0.822477	-5.01289	106
FBXW5	0.30407	2.77023	106
FBXW8	0.185751	6.95539	106
FMO1	0.81056	11.9729	106
FPGT-TNNI3K	0.637835	5.62832	106
GDPD3	0.227345	-8.74563	106
GIMAP2	0.599645	11.89	106
GYPA	0.550356	14.6408	106
HIVEP3	0.128521	6.09788	106
HMBOX1	0.310677	9.82183	106
HS6ST1	0.329678	5.90831	106
ITGA2B	0.532658	-37.5007	106
JARID2	0.728853	13.6315	106
KAT14	0.184741	2.62957	106
KIAA2013	1.05654	10.9801	106
KIF19	0.00472605	3.61029	106
KIF20B	0.0600179	7.75427	106
KLHDC10	0.527957	13.7563	106
KLRG2	1.08318	6.87605	106
LRP1B	0.410565	3.67838	106
LRRC17	0.748727	10.9803	106
LTA4H.1	0.837957	13.9638	106
MAD2L1BP	0.425936	13.099	106
MAD2L2	0.607007	14.502	106
MAFF	0.625091	13.1917	106
MAFK	0.223498	-3.13182	106
MAP3K9	0.838434	-17.6395	106
MED31	0.183024	7.77468	106
MEGF8	0.41901	9.60865	106
MEIS1	0.579321	11.8339	106
METAP1D	1.14926	8.81715	106
MIEF1.1	0.312648	14.5751	106
MIS18BP1	0.23251	9.4695	106
MMP13	0.613457	11.052	106
MNT	0.867592	13.9733	106
MORC1	0.674483	14.3648	106
MST1L	0.851644	11.6279	106
MTA3	0.184195	-5.1072	106
MTMR2	0.225497	9.93702	106
MTMR4	0.50922	-9.15979	106
MYOF.1	0.166077	10.2651	106
NEFL	0.529229	-3.16701	106
PADI4	0.804474	-17.71	106
PEX11B	0.016519	-2.44255	106
PEX16	0.052085	6.77453	106
PGS1	0.611656	13.8911	106
PHF21B	0.670569	14.6616	106
PIAS3	0.583099	9.40962	106
PKP2.1	1.02559	9.82675	106
PLCZ1	7.85314	-37.9009	106
PNMA1	0.933911	12.2728	106
POLDIP3.1	0.697639	8.71016	106
PRDM10	0.887043	12.2365	106
PRKD3	0.0416377	-16.2778	106
PSD3	1.34601	-5.32562	106
PTOV1	0.174716	-2.50045	106
PXDC1	0.212632	8.22163	106
QSOX2	1.01479	11.1786	106
RAB17	0.545695	9.76058	106
RAB19	0.841827	14.1353	106
RCAN1	0.0236655	3.56261	106
RDH16	0.66958	-15.9621	106
RECQL4	0.583043	14.3203	106
RIC8B	0.47686	-1.5617	106
RMDN2	0.895696	8.20276	106
RNF216	0.78186	14.5828	106
RPL36A	1.02831	12.4264	106
SACS	0.386528	-12.599	106
SCG3	0.498768	7.75931	106
SCUBE3	0.210034	2.72671	106
SERPINE1	0.744732	-2.343	106
SIK2	0.166194	-9.75939	106
SLC12A6	0.7563	15.1996	106
SLC22A18	1.18568	10.452	106
SON	0.422771	14.5119	106
SP140L	0.158706	5.73299	106
SPI1	0.681813	9.64034	106
SPIN4	0.930344	11.7383	106
STK36	6.05752	-20.7714	106
STX11	0.792175	12.2434	106
SYNC	0.830728	11.3789	106
SYTL5	1.02372	11.5738	106
TATDN2	0.61531	13.4629	106
TBPL1	0.113317	-39.2126	106
TCF3	0.873349	11.7427	106
TIMELESS	0.917803	13.154	106
TMEM222	0.818309	14.2812	106
TMEM65	1.3058	7.74422	106
TMEM68	0.672103	11.4584	106
TRPC4AP	0.452282	8.896	106
TRPV2	0.339634	12.8253	106
TSHZ3	0.548651	14.635	106
TSPAN1	0.579016	12.6695	106
TTC14	0.0150604	-26.8922	106
TTF1	0.530815	12.8265	106
TXNDC15	1.1029	11.4132	106
UBALD1	0.485506	3.43524	106
UGCG	0.404129	10.9307	106
ULK1	0.350582	14.2762	106
UNC93B1	0.799784	13.3425	106
USP43	0.882185	11.9858	106
VANGL2	0.369024	13.8468	106
WDCP	0.585302	6.96646	106
WDR34	0.56636	10.5221	106
WDR76	0.860897	14.0825	106
YBEY	0.744395	14.353	106
ZBTB43	0.654803	15.0582	106
ZEB1	0.327706	1.61877	106
ZMAT3	0.144775	-56.2995	106
ZNF157	0.771053	2.64613	106
ZNF185.1	0.417453	12.0139	106
ZNF511	0.0487517	-3.11513	106
ZNF624	0.0726053	-7.69636	106
ZNF679	0.268919	-7.92576	106
ZNF749	0.335428	9.59333	106
ABCB7	0.221605	8.77667	107
ABHD17C	0.587511	14.3566	107
AIMP2	0.226321	5.77754	107
ALOX12B	0.635677	-1.743	107
ALOXE3	0.556243	3.94951	107
ANAPC13	0.465034	14.6904	107
ANKRD31	0.913474	12.0146	107
ARHGAP6	0.268967	6.73337	107
ARRB1	0.107954	10.2251	107
ASB13	0.49169	12.0256	107
ATG4A	0.257538	6.78627	107
ATP10A	0.520781	8.50713	107
ATP12A	0.132024	-0.491412	107
AURKA	0.901937	10.985	107
BCL2	0.347934	4.13589	107
BCL2L11	0.351111	7.50177	107
BMF	0.451182	1.91287	107
C11orf84	1.03079	9.47339	107
C15orf39	0.319003	11.7869	107
C6orf47	0.794303	7.58384	107
C9orf16	0.214579	0.923035	107
CACNA2D3	0.560669	12.7868	107
CCDC71L	0.557405	7.26133	107
CD99	0.902992	10.5108	107
CEP104	0.518731	7.44905	107
CEP162	0.558486	4.67044	107
COLEC10	0.240161	3.17255	107
COPS9	0.359189	13.8558	107
CRIM1	0.404887	8.62912	107
CYP2A6	0.366577	-10.9559	107
DAD1	1.37698	3.0475	107
DCTN4	0.701885	0.0734722	107
DCUN1D3	0.520377	14.5337	107
FAM117A	0.222802	-10.708	107
FAM133B	0.444833	1.00324	107
FAM151B	0.702273	6.30845	107
FAM168B	0.817821	13.3731	107
FAM219A	0.501162	14.6268	107
FAM50B	0.490547	4.88181	107
FBXL15	0.204211	-18.8488	107
FOXO1	0.799731	12.3199	107
FZR1	0.160079	-2.18371	107
GDF15	0.830279	-8.21318	107
GINS1	1.10616	10.0684	107
GPN2	0.633906	14.3302	107
GZF1	0.155612	5.41037	107
ICAM3	0.476567	12.3563	107
IFITM2	0.824894	11.9078	107
ITGB1BP1	0.0370432	5.31676	107
ITPRIPL2	0.049431	4.17476	107
KCTD6	0.351035	6.61634	107
KIAA0753	1.80223	-14.2905	107
KIAA1328	0.0526273	10.3696	107
KIFC3	0.466892	13.3006	107
KLF13	0.589254	1.55882	107
KSR1	0.117548	-10.3399	107
LILRB2	0.533692	14.7454	107
LRP10	0.281328	1.69286	107
MANSC1	0.295851	12.0196	107
MCM8	0.207582	2.29811	107
MGAT4A	0.843832	7.37086	107
MSMO1	0.20085	-2.0739	107
MUL1	0.327603	2.79936	107
MYO15A	0.437534	13.9557	107
MYO6	1.12882	7.53734	107
MYOC	0.102514	7.46914	107
MYSM1	0.440443	9.84043	107
NAB1	0.661811	14.529	107
NARF	0.706345	14.7643	107
NOL3	0.330258	1.90955	107
NOXA1	1.13077	11.3252	107
NR2C2.1	0.509583	4.01561	107
NUP210L	0.692319	14.0377	107
PAGR1	0.748205	3.08008	107
PBLD	0.450087	14.4434	107
PCMTD2	0.76654	10.5898	107
PDLIM7.1	0.720997	11.2355	107
PEX13	0.785739	14.1363	107
PHLDA1	0.553895	8.48253	107
PHLDA2	0.558876	11.5718	107
PKMYT1	0.577015	6.3653	107
PLEKHM1	0.0188844	-11.4582	107
PLIN5	1.11441	6.63906	107
PPFIBP2	0.566564	5.66524	107
PPP1R16A	0.16483	10.2649	107
PROM1	0.713093	10.9818	107
RAD51AP1	0.772917	1.5031	107
RHOA	0.389193	7.24869	107
RNF10	0.653326	12.178	107
ROR2	0.932906	13.4842	107
SARAF	0.0883757	-3.124	107
SEC61G	0.641871	12.6626	107
SENP2	0.782159	13.7476	107
SEZ6L2	0.539436	11.727	107
SFT2D3	0.837753	14.0666	107
SH2D3C	0.173364	6.83949	107
SKA3	0.955072	10.8179	107
SLC16A3	0.408191	13.691	107
SLC7A2	0.705318	0.408654	107
SON.1	0.515979	13.1908	107
SPATA33	0.746673	13.6223	107
SPEF2	0.849842	12.815	107
SRGN	0.858182	7.97918	107
SSBP4	0.60641	1.71225	107
TIMM22	0.133319	7.53967	107
TJP3	0.578359	11.0258	107
TMEM9B	0.363061	-9.40786	107
TRIM37	0.0294308	-3.02394	107
TSC22D1	0.788365	14.3739	107
TSEN2	0.633574	13.7839	107
UBAP2L	0.453913	12.8992	107
URM1	0.34886	14.0919	107
VHL	0.127947	5.39799	107
YAE1D1	0.692877	13.2962	107
YDJC	0.597317	11.5628	107
ZBTB45	0.121839	0.777477	107
ZNF224	0.631764	14.1545	107
ZNF432	0.370488	3.72049	107
ZNF608	0.294369	5.94655	107
ABCC11	0.550834	-13.0061	108
ADIPOQ	0.875122	-1.06359	108
ALKBH1	0.0347808	-10.5275	108
ANKRD49	0.410385	11.6407	108
CDC42SE2	1.14487	9.44188	108
CEBPG	0.503966	13.6255	108
CXCL9	0.812316	14.2902	108
CYTIP	0.352181	-22.7794	108
DERL2	0.625477	12.4426	108
DNAJC25	1.02147	11.5836	108
DNAL4	0.229959	0.434401	108
FZD7	0.56429	13.4306	108
GPRC5C	0.618191	14.0025	108
KIF1A	1.16673	-5.12661	108
MYO1C	0.462113	11.7203	108
NEGR1	0.685366	11.6621	108
NLRP7	0.404447	13.3456	108
NR2C1	0.486372	-4.65104	108
NTN1	0.0913065	6.95927	108
NUSAP1	0.805815	9.61376	108
PEBP4	0.873816	-2.13279	108
PPM1K	0.717001	12.1311	108
PRKD1	0.469923	14.575	108
RAB6B	1.01676	8.02879	108
RNASEH1	1.30237	8.06964	108
RP11-274B21.1	0.426472	13.8644	108
RPP14	0.655565	12.354	108
SNX11	0.824745	7.45142	108
TBC1D10C	0.875091	14.3763	108
TCL1A	0.800644	11.8067	108
TCP11L2	1.59008	-26.072	108
TET1	0.670776	14.3668	108
TFDP2	0.167745	-9.92	108
THSD7A	0.552173	13.385	108
TICAM1	6.33631	-22.8311	108
TRANK1	0.0714985	8.01701	108
TRERF1	0.603665	14.4588	108
TXNL4B	1.07184	12.2208	108
ZNF276	0.482142	4.2174	108
C1D	0.572158	14.1789	109
C2.1	0.162416	5.62067	109
C4orf33	0.552051	13.3788	109
CLIC5	0.526298	8.03498	109
CTBP1	0.691952	6.42762	109
DPAGT1	0.719705	14.9478	109
GMNN	0.841759	10.1114	109
GOLT1B	0.357857	-9.26897	109
ITIH4	0.565193	13.2643	109
MRVI1	0.566547	14.3598	109
NOV	0.881621	2.76774	109
PAGE5	0.647205	-22.093	109
PCLO	0.545735	14.6552	109
RAB3A	0.130953	1.75366	109
S100A7	0.742002	7.49224	109
SLC11A2	0.670356	11.1354	109
ZNF467	0.178527	-10.2333	109
COL9A2	0.0267705	-0.823804	110
COPS2.1	1.24175	3.07614	110
HIPK1	0.957478	13.0442	110
MAGEA4	1.72947	-7.52223	110
SLC7A6	0.85637	11.8604	110
ARID5B	0.785135	13.0255	111
ARPIN	0.448363	7.88927	111
KDM6B	0.273165	6.74832	111
S100A2	0.711266	-12.5139	111
BAK1	0.185449	4.91447	112
ENO3	0.173047	-15.6865	112
ERBB4	0.630003	7.89204	112
GSTM1	0.849678	4.50426	112
HERC3	0.768934	8.66758	112
MAP4	0.337627	-13.8494	112
TTN	1.34409	2.98842	112
ZCCHC9	0.422748	9.17947	112
ABCA1	0.234882	0.767875	113
ACAD11	0.526925	9.57646	113
ACTN2	0.230269	4.89765	113
ADAMTS7	0.205447	6.72091	113
ANKRD10	0.691443	13.3654	113
AP2A2.1	0.0820763	-27.1406	113
ARMC5	0.23255	5.79136	113
ARV1	0.875815	11.2804	113
ATXN2L	0.704477	7.68952	113
BEND5	1.04264	11.7657	113
C19orf53	0.602782	-1.78584	113
C3orf58	0.574992	-8.40873	113
CAND2	0.522606	4.50922	113
CNBP.1	1.38987	2.06381	113
CNTN4	1.40344	4.09389	113
COX20	0.813839	11.8014	113
COX8A	0.391324	14.201	113
CRISPLD1	0.36532	-27.1065	113
CRYM	1.20136	-34.1557	113
DCUN1D4	0.0693147	-11.261	113
DLC1	0.765544	11.9592	113
DNAJC14	0.38395	4.31708	113
DOT1L	0.0883409	-24.4746	113
EGFLAM	0.737716	11.6187	113
EXTL2	1.12127	12.4607	113
FAM60A	0.0099538	2.10535	113
FMO5	1.0698	-6.67385	113
GFRA1.1	1.16503	9.44638	113
KDF1	0.931193	1.53455	113
KLHDC3	0.148969	3.70936	113
KLK6	0.370901	4.84047	113
LIAS	0.0755344	6.99323	113
LOXL3	0.40422	14.6844	113
LPL	0.526734	1.63262	113
LUC7L3	0.776475	14.6746	113
MAT1A	0.967202	10.9149	113
MIS18A	0.0551798	-3.13149	113
MLPH.1	1.68786	-3.7213	113
MLX	0.401449	13.8933	113
MYD88	0.117987	-8.68941	113
NAT6	0.433082	13.8932	113
PARL	0.717578	13.4231	113
PNMT	0.395899	2.04777	113
POMK	0.272052	0.602186	113
PPP1R1A	0.459939	14.5896	113
PRKACB	0.652432	2.4027	113
PRKCH	0.460938	13.3689	113
PTPN3	0.684727	9.8216	113
RHBDD2	1.42215	-8.84811	113
RND3	0.744645	14.9132	113
SAC3D1	0.710124	10.8566	113
SCEL	0.814356	-1.98013	113
SCGB1D2	0.668123	-7.14662	113
SERBP1.1	1.08929	9.31304	113
SMOC1	1.00675	-1.37395	113
SNCB	1.02626	12.6204	113
SYDE1	0.679541	11.4807	113
TCN1	0.562493	6.81895	113
TOMM7	0.258316	-0.805539	113
TPP2	0.354411	14.2136	113
TPST2	0.549264	14.8495	113
TTC7A	0.667396	14.6184	113
TTL	0.602022	11.9667	113
TXLNB	0.20819	-21.8812	113
UBE2J2	0.191795	9.49774	113
UTP11	0.913306	10.2854	113
WTIP	0.0483367	1.43798	113
ZNF277	0.471457	14.459	113
ZNF3	0.114856	4.60972	113
ZNF418	0.618033	7.05952	113
ABCC3	0.559059	5.43231	114
ABHD17B	0.0725316	9.07597	114
ACIN1	0.791643	11.5238	114
ACTL8	0.694789	2.43688	114
ADCK1	0.908854	13.2201	114
ADGRE2	1.03722	11.4493	114
ADGRL2	0.462096	-9.19906	114
ADH1C	0.312523	5.30507	114
AGAP2	0.327066	1.69412	114
AGAP2.1	0.516032	14.4569	114
AGPAT2	1.10954	8.67697	114
AKAP9	0.493753	10.518	114
ALKBH2	0.654523	12.4713	114
ALS2	0.951846	12.1086	114
ANAPC2	0.553558	8.58697	114
ANKRD12	0.625149	-38.1854	114
ANKRD26	0.558194	9.11556	114
ANKRD30A	5.20041	-33.3461	114
ANKRD40	0.301067	-10.4292	114
AP1S3	0.295555	14.3043	114
AP4B1	0.172612	8.01099	114
APOBEC3D	0.472759	14.8403	114
ARAP3	0.909818	3.38182	114
ARHGAP17.1	0.216415	3.21604	114
ARHGEF26	0.783328	14.7284	114
ARL 15.00	1.03838	12.5858	114
ARNTL	0.719201	13.4414	114
ASB9	0.380209	14.787	114
ASTN2	0.703786	-2.51641	114
ATAD3B	0.748844	9.21155	114
ATP2B4	0.75687	12.2156	114
ATP8A2	0.530939	14.8413	114
AXIN1	0.174049	-5.71899	114
B4GALT3	0.00190634	9.2981	114
BBOX1	0.98251	-1.3023	114
BCCIP	0.172026	4.29861	114
BCL6	0.0849146	2.86193	114
BCLAF1	0.076464	-1.8484	114
BOD1L2	0.0476246	-22.447	114
BOK	0.870265	15.038	114
BRCA2	0.00701033	0.329924	114
BTBD1	0.0792948	-19.0151	114
BUB1	1.01217	8.29064	114
C10orf54	0.692101	13.1271	114
C17orf80	0.217097	8.00714	114
C2orf54	0.851088	5.05743	114
CACNA2D2	0.789397	9.02119	114
CACNG6	0.718287	-14.0162	114
CAPN5	0.286057	-0.881087	114
CARD6	0.382884	9.02347	114
CBX2	0.950627	13.8074	114
CBX6	0.151924	4.91784	114
CCDC121	0.274906	6.64997	114
CCDC149	0.784389	15.1353	114
CCL5	0.767621	11.2581	114
CCNB2	0.85886	12.9002	114
CD5	0.597458	6.39304	114
CD74	0.599818	14.4579	114
CDKL3	0.43245	14.5492	114
CDKL5	0.241379	-3.69109	114
CEACAM1	0.671867	11.4512	114
CEP295	0.71424	6.11869	114
CERS6	1.02042	12.6519	114
CFLAR	0.640817	5.29242	114
CHAC2	0.354834	12.4878	114
CHD7	0.611561	10.9338	114
CHEK1	0.740493	0.849336	114
CHKA	1.32097	6.51235	114
CHPF	0.786723	13.9634	114
CHRD	0.487841	2.43037	114
CLGN	0.881622	-4.18858	114
CLIP4	0.495906	5.35578	114
CLSTN3	0.648567	7.56518	114
CNGB3	0.772725	11.1005	114
COL22A1	0.0471399	-1.82668	114
CORO7	0.59944	14.6296	114
COX19	0.759895	14.4645	114
CPEB2	0.766482	8.37812	114
CRACR2A	0.53508	12.5143	114
CRAMP1	0.263246	-4.58934	114
CRP	0.817448	-9.80916	114
CSNK1G1	0.674011	14.2835	114
CSNK1G3	0.699642	14.8934	114
CTAGE1	1.03502	8.48465	114
CXCL13	0.464466	2.07785	114
CXorf23	0.520849	5.87737	114
CYFIP1	0.788591	-1.83029	114
CYP2S1	0.941868	-2.67385	114
DCLK3	0.577421	14.176	114
DENND5A	0.542606	8.78809	114
DGKD	0.0809874	9.44165	114
DIS3L	0.471144	-2.25197	114
DNAH14	0.311212	8.29825	114
DNAH2	0.0769042	3.02291	114
DROSHA	0.0354818	9.18609	114
DSTYK	0.0352748	-3.81917	114
E2F3	0.762926	10.4385	114
EDARADD	0.856561	9.10503	114
EEF1AKMT1	0.706083	9.15859	114
EFNB1	0.511672	-4.41407	114
EIF2AK1	0.165692	-4.9304	114
ELAC1	0.0344834	-0.768534	114
ELK1	0.300236	14.6352	114
ERICH1	0.57366	11.2917	114
ESPN	0.385322	14.4524	114
EVI5	0.837892	11.7192	114
EZH1	0.830673	15.1981	114
F8	0.91159	14.4786	114
FAAP100	0.539824	5.59762	114
FAM110B	0.874473	13.803	114
FAM118A	0.793105	1.76145	114
FAM133A	0.863761	11.5791	114
FAM160A1	0.984465	13.6568	114
FAM174A	0.581158	10.1243	114
FAM193B	0.657658	14.8772	114
FAR1	0.736994	-14.6799	114
FBXO21	0.22678	-10.8007	114
FBXO42	0.561974	14.7776	114
FCGR3A	0.82567	14.5029	114
FERMT1	0.651847	11.3986	114
FGA.1	0.786326	14.486	114
FHDC1	0.329203	14.7571	114
FOXN3	3.84172	-21.5344	114
GAL3ST4	0.137459	6.27934	114
GALNT5	0.215315	-13.8486	114
GBP7	0.663687	8.53213	114
GEMIN7	0.818242	13.9386	114
GLCCI1	0.1465	7.68343	114
GLTSCR1L	0.13447	3.77485	114
GNAZ	0.305966	9.71607	114
GPAA1	0.58124	14.6956	114
GPAT4	1.11994	5.33487	114
GPR108	0.957033	8.87326	114
GRAMD4	0.664039	14.7527	114
HAGH.1	0.677237	-2.18078	114
HERC6	0.775136	-3.17376	114
HGF	0.647404	14.334	114
HIC1	1.03648	12.8177	114
HNRNPD	1.05233	-12.2712	114
IFRD1	0.163293	1.69036	114
IFT43	0.902728	8.13058	114
IFT52	0.925588	13.8154	114
IGF2BP1	0.671247	2.21379	114
INF2.1	0.301459	8.0839	114
INO80B	0.0301843	-18.7047	114
INO80C	0.61522	14.5933	114
INPP5J	0.624496	15.1003	114
IRF2BP2	0.184102	-1.24095	114
IRF7	0.592401	14.2172	114
IRX2	0.803887	11.0954	114
ITGA7	0.795173	-0.945302	114
ITGB3	0.460002	-3.20963	114
KAT5	0.142322	-26.7938	114
KBTBD6	0.649105	14.9916	114
KDM8	0.000755206	4.54372	114
KIAA0355	0.107868	-28.8972	114
KIAA1107	0.549562	13.7667	114
KIAA1147	0.264105	8.96382	114
KIF26B	0.0258627	-2.17396	114
KLHL7	0.81334	15.33	114
KNSTRN	1.05327	6.95093	114
KPTN	0.653215	13.5382	114
KRT4	1.19734	-25.9155	114
KRT81	0.945157	-17.993	114
LACC1	0.598534	14.755	114
LAMA1	0.137197	-12.591	114
LDLR	0.35102	10.7869	114
LINC01873	0.848763	1.01654	114
LRRC8A	0.754264	13.829	114
LRRCC1	0.549296	15.2896	114
LTBR	0.801548	8.45507	114
MAP1LC3B	0.995354	12.2907	114
MAPKBP1	0.490569	-51.1964	114
2024-03-07	0.203664	10.0299	114
MASP2	0.352023	2.15784	114
MBLAC1	0.542725	15.1133	114
MCRIP2	0.17158	10.0245	114
MEGF9	0.463257	15.0375	114
METTL9	0.775287	14.8924	114
MFSD6	0.624849	15.0973	114
MGAT2	0.172965	8.10528	114
MGST2	1.21692	0.730811	114
MID1	0.584874	15.0466	114
MID1IP1	0.0763658	-1.34417	114
MIEF1	0.519335	14.3885	114
MIS12	0.4987	10.8204	114
MKKS	0.728252	12.1355	114
MPHOSPH9	0.38619	-3.68327	114
MRPL35	1.15927	9.16126	114
MSL2	0.800755	14.1821	114
MST1R	0.0875782	3.78155	114
MT1G	0.831548	14.4412	114
MTF2	0.504013	11.7586	114
MTX3.1	0.404379	14.7841	114
MYADM	0.774521	9.5677	114
MZT2A	0.186358	6.40927	114
NCBP2-AS2	0.417384	13.0694	114
NDST1	0.237465	6.56026	114
NECTIN1	0.660504	6.39621	114
NEK4	0.0149469	6.61512	114
NFATC3	0.618435	14.3172	114
NOMO1	0.296922	-41.2955	114
NRIP1	0.293969	-4.33778	114
NTM	0.438438	11.9448	114
NUMA1	0.786044	12.63	114
OLFML2A	0.183048	7.87428	114
OSTM1	0.567599	7.97928	114
OTUD5	0.583966	14.7495	114
PACSIN2.1	0.254865	-10.9021	114
PAG1	0.896392	5.60087	114
PAICS	0.49385	5.54921	114
PAPD4	0.056526	2.89053	114
PARD6A	0.509714	12.8303	114
PASK	1.28658	7.713	114
PCBP2	0.45723	-21.7087	114
PCGF5	0.735238	-21.3997	114
PCSK1N	0.534347	14.9023	114
PDE3A	0.0485123	5.19118	114
PEG3	0.406399	5.25197	114
PIAS2	0.766085	11.0186	114
PID1	0.832939	5.53466	114
PIGU	1.03342	13.0175	114
PLEKHA4	0.938186	12.9379	114
PLP2	0.469172	9.94066	114
PLXDC1	0.0875662	-17.3209	114
PNKD.1	0.501956	2.23987	114
POC1B-GALNT4	0.49042	13.456	114
POLD4	0.0819019	1.2125	114
POLG2	0.236047	1.83181	114
POLQ	0.0109743	-5.24042	114
POLR2F	0.651256	-6.56315	114
POLR2L	0.23617	9.01894	114
POLR3H	0.613564	12.1875	114
PPFIA3	0.812008	10.9497	114
PPP1R12B	0.730511	14.1506	114
PPP2R5C	0.29299	-9.75503	114
PRMT7	0.550977	14.9073	114
PWWP2A	0.183839	6.24855	114
PYHIN1	0.494214	13.0002	114
PYURF	0.779269	14.5668	114
[truncated: 8,105 more rows]

## Sheet: CPTAC_CCRCC_N
	BI_mean	bic_diff_mean	N
A1BG	1.00564	9.90122	84
A1CF	1.07783	-24.7394	84
A2M	0.928034	11.7677	84
AAAS	1.06394	10.9202	84
AACS	0.848455	13.3923	84
AADAT	1.53676	-1.95362	36
AAED1	0.932679	2.42199	36
AAGAB	0.823471	11.9908	84
AAK1	0.71209	12.5152	84
AAMP	1.00056	11.1739	84
AAR2	0.741491	12.8969	84
AARS	0.907452	11.5546	84
AARS2	1.23934	-6.73394	84
AARSD1	1.22023	6.19972	84
AASDHPPT	0.835125	13.2283	84
AASS	1.00143	5.07798	84
AATF	0.639079	13.2338	84
ABAT	1.06789	-2.29614	84
ABCA1	1.17293	7.4233	76
ABCA2	0.773232	11.5736	80
ABCA8	1.18323	9.83644	60
ABCB1	1.25101	6.86989	84
ABCB10	1.16579	8.09434	84
ABCB6	1.0772	8.46615	84
ABCB7	0.93247	9.77245	48
ABCB8	1.29658	3.98914	84
ABCC1	0.985952	12.5461	84
ABCC10	1.42559	7.27793	52
ABCC2	1.26238	5.84898	84
ABCC3	0.891693	12.7344	84
ABCC4	1.30111	8.18609	84
ABCC6	1.46281	-3.5956	84
ABCD1	1.12841	9.77526	84
ABCD3	1.16616	7.68805	84
ABCE1	0.968658	10.8313	84
ABCF1	1.20855	7.46824	84
ABCF2	0.646497	7.06102	84
ABCF3	1.3241	6.93901	84
ABCG2	1.07501	4.53664	32
ABHD10	0.824986	2.95163	84
ABHD11	0.727676	13.6973	84
ABHD12	0.943699	13.061	84
ABHD14B	0.811627	8.56395	84
ABHD15	1.03307	-1.64196	76
ABHD17A	0.93404	11.7067	56
ABHD17B	1.14299	11.1365	68
ABHD18	1.15959	5.49522	36
ABHD3	0.750057	9.68269	64
ABHD4	1.11682	7.90513	84
ABHD5	0.57362	13.2792	84
ABHD6	1.53823	-11.3734	84
ABI1	1.44653	6.95569	48
ABI2	0.982145	11.8313	84
ABI3	0.768045	12.8213	84
ABL1	0.989836	10.1596	84
ABL2	0.501239	3.17658	80
ABLIM1	0.802086	13.3917	84
ABLIM1.1	1.12298	-5.89625	84
ABLIM3	0.704791	12.101	60
ABLIM3.1	1.01849	9.55329	52
ABO	1.82683	1.0012	40
ABR.2	0.844279	11.7872	80
ABRACL	1.06828	10.5624	84
ABRAXAS1	1.00567	8.05563	84
ABRAXAS2	0.900008	12.3324	84
ABT1	1.16163	7.98477	72
ABTB2	0.758807	12.8031	60
ACAA1	1.4471	-5.3632	84
ACAA2	1.14439	9.07353	84
ACACB	0.861748	6.21019	64
ACAD11	1.05355	-1.71482	84
ACAD8	1.09244	-5.20656	84
ACAD9	1.17033	3.13962	84
ACADL	1.63409	-12.5189	84
ACADM	1.11898	5.2249	84
ACADS	0.9157	3.70603	84
ACADSB	1.1335	-9.90893	84
ACADVL	0.587243	10.7198	84
ACAN.1	0.239796	-6.37617	84
ACAP1	1.06099	11.6286	80
ACAP2	0.834292	-1.55819	84
ACAP3	1.27058	6.26665	56
ACAT1	1.094	-10.5264	84
ACAT2	1.041	6.47597	84
ACBD3	0.84683	11.1314	84
ACBD4	1.14132	8.54053	72
ACBD5.1	0.819155	11.7172	84
ACBD6	1.54916	5.495	84
ACCS	1.0208	8.35414	36
ACE	1.45883	1.85917	84
ACE2	1.16072	8.41865	84
ACIN1	1.40346	5.84314	80
ACLY	1.19393	4.02946	84
ACLY.1	1.07625	-4.01236	84
ACMSD	1.08588	-6.14025	84
ACO1	1.0852	-0.193673	84
ACO2	1.19879	-12.3506	84
ACOT1	0.626212	12.2718	76
ACOT11	0.831867	11.6057	84
ACOT13	1.45826	-22.7341	84
ACOT2	2.03696	-14.2116	84
ACOT4	1.44087	2.67822	84
ACOT7.1	1.17302	-14.2687	84
ACOT8	1.14936	3.32801	84
ACOT9	0.902911	12.3108	84
ACOT9.1	0.987353	11.1892	48
ACOX1	0.772701	13.5425	84
ACOX1.1	1.13401	7.5875	84
ACOX2	1.73412	-14.6585	84
ACOX3	1.26247	4.01787	84
ACP1	0.868179	3.34557	84
ACP1.1	0.757997	12.3351	76
ACP2	1.1939	7.53906	84
ACP5	0.968789	3.8963	84
ACP6	1.21209	5.84644	84
ACPP	1.12092	-0.427439	84
ACSF2	1.16993	-28.6083	84
ACSF3	1.55458	0.264432	84
ACSL1	0.471117	11.6294	84
ACSL1.1	1.03765	11.0137	68
ACSL3	0.860829	8.43616	84
ACSL4	1.02799	7.51185	84
ACSL5	0.801079	11.8685	84
ACSM2A	1.17274	1.91062	84
ACSM2B	1.1707	-18.483	84
ACSM3	1.15396	4.07719	84
ACSM5	0.80781	8.1436	84
ACSS1	0.913955	3.59861	84
ACSS2	1.18091	5.13234	84
ACSS3	0.914289	6.3023	84
ACTA1	0.505804	11.5595	72
ACTA2	1.02804	-0.17586	84
ACTB	1.19931	1.02769	84
ACTBL2	1.01512	12.3658	84
ACTG1	1.04522	7.75078	84
ACTL6A	2.15393	-35.2707	84
ACTN1	1.37633	6.10523	76
ACTN1.1	0.757615	-4.90251	84
ACTN4	1.27742	-6.66921	84
ACTN4.1	0.804148	11.6095	84
ACTR10	1.08711	11.1193	84
ACTR1A	0.808408	7.97786	84
ACTR1B	0.763652	6.75991	84
ACTR3	0.534615	9.75533	84
ACTR3B	0.69075	11.0763	72
ACTR5	0.699284	11.5764	84
ACTR6	0.935443	9.27734	84
ACTR8	1.11928	-0.777835	84
ACTRT1	0.243053	6.5639	44
ACVR1	0.973626	9.07982	80
ACVR1B	0.774679	11.0609	40
ACY1	0.725272	-10.3242	84
ACY1.1	1.24691	-8.23425	84
ACY3	1.01231	1.36685	84
ACYP1	0.913466	8.08476	84
ACYP2	0.625281	13.5801	84
ADA	0.87757	1.95905	84
ADA2	1.05452	-0.467995	84
ADAL	1.48033	-2.75357	84
ADAM10	0.924736	11.2188	84
ADAM17	0.637117	13.6079	84
ADAM22	1.8879	0.433047	32
ADAM9	1.28906	8.96475	84
ADAMDEC1	0.981492	11.2042	48
ADAMTS1	1.22264	-11.6526	64
ADAMTS5	1.13907	9.94743	40
ADAMTS7	0.940782	10.355	56
ADAMTSL1	0.887283	7.50383	76
ADAMTSL2	0.996767	-4.41294	84
ADAMTSL3	1.24464	8.68965	72
ADAMTSL4	0.355881	7.69977	84
ADAMTSL5	0.857204	11.5419	84
ADAP1	0.942916	11.8332	84
ADAP2	0.738308	12.7264	72
ADAR	1.01353	10.7485	84
ADAR.1	1.01111	11.9294	56
ADARB1	0.595127	10.5921	32
ADAT1	0.514602	3.60607	68
ADAT2	1.83987	2.48222	36
ADAT3	0.953585	10.0752	68
ADCK1	1.08886	7.22863	84
ADCK5	0.793114	7.11117	72
ADCY6	1.4	2.83982	84
ADCY9	0.996377	8.89282	84
ADD1	1.06547	0.174664	80
ADD1.1	0.968541	6.18469	84
ADD2	0.917761	7.12997	80
ADD3	0.977283	9.97992	84
ADD3.1	1.07385	-14.8217	84
ADGRE2	0.804317	10.9392	44
ADGRE5	1.12734	-0.930708	84
ADGRF1	1.05373	-3.3217	80
ADGRF5	0.661209	13.4171	84
ADGRG1	0.987568	4.56986	84
ADGRG6	1.27686	8.81926	40
ADGRL2	0.845841	11.4918	84
ADGRL4	0.994806	3.00507	84
ADGRV1	2.72223	-10.4679	36
ADH1A	1.38919	-5.73686	84
ADH1B	1.22613	-5.85205	84
ADH1C	0.941217	11.5878	84
ADH4	0.524596	9.49483	48
ADH5	1.17699	-5.93552	84
ADH6	1.07636	-24.279	84
ADHFE1	0.809092	9.78196	84
ADI1	1.32666	-0.70934	84
ADIPOQ	0.604912	13.4528	84
ADIPOR1	1.23255	8.64494	44
ADIRF	1.04912	11.7677	84
ADK	0.982201	7.86139	84
ADNP	1.09032	-0.906914	84
ADNP2	0.616352	11.6536	48
ADO	0.467759	13.7423	84
ADPGK	1.47089	3.74214	84
ADPRH	0.901718	3.67112	84
ADPRHL2	0.914511	7.77327	84
ADRM1	0.124669	9.42858	84
ADSL	0.637696	10.3087	84
ADSS	0.55485	13.5691	84
ADSSL1	1.12184	-2.18481	84
AEBP1	0.731455	2.20283	84
AES	1.17468	5.73799	84
AFAP1	1.01312	11.689	84
AFAP1L1	0.559702	13.0549	84
AFAP1L2.1	0.937911	3.02475	32
AFDN	1.30361	9.24336	40
AFDN.1	0.850974	11.7084	84
AFF1	0.422501	10.8432	80
AFF4	0.755226	13.191	84
AFG1L	1.08792	-9.43221	84
AFG3L2	0.921818	5.64293	84
AFM	1.05426	11.9314	84
AFMID	1.20323	-2.43753	84
AFTPH	0.906395	-3.17417	84
AGA	0.923594	8.23981	84
AGAP1	0.99967	9.10384	84
AGAP3	0.910487	11.4596	84
AGFG1	1.00631	8.50992	84
AGFG2	1.49603	-17.3377	84
AGGF1	0.900643	11.5943	56
AGK	1.0403	0.0437727	84
AGL	1.06993	9.51683	84
AGMAT	1.1342	6.20317	84
AGO1	0.828542	9.21252	84
AGO2	1.08043	-6.4774	84
AGO3	0.804469	12.8495	84
AGPAT1	1.29388	6.25005	84
AGPAT2	0.857488	13.1554	84
AGPAT3	1.60035	-1.46512	84
AGPAT4	0.980988	6.42993	36
AGPAT5	1.25522	5.24324	84
AGPS	1.10663	10.8481	84
AGR2	1.96492	-12.4752	84
AGR3	1.30476	-4.07713	52
AGRN	1.3197	-0.415161	84
AGT	1.1903	7.32745	84
AGTPBP1	0.976777	8.01443	80
AGXT	1.5863	-1.92624	84
AGXT2	1.24663	4.91656	84
AHCTF1	0.966018	10.1093	84
AHCY	0.70706	12.9831	68
AHCYL1	0.990746	7.23947	84
AHCYL2	1.80622	-3.93435	80
AHCYL2.1	0.807266	11.8594	80
AHDC1	1.00097	6.2026	84
AHNAK	1.04648	-0.134612	84
AHNAK2	1.28182	8.44633	84
AHR	1.18651	7.36643	84
AHSA1	0.380167	11.6431	84
AHSG	0.83838	10.6784	44
AHSG.1	0.821886	13.2734	84
AHSP	0.700601	10.7215	84
AIDA	1.01291	-5.04343	84
AIF1	0.826608	11.2636	84
AIF1L	1.25564	2.19457	84
AIFM1	1.28861	-14.7684	84
AIFM2	0.512888	13.6928	84
AIG1	0.742552	10.8425	80
AIMP1	0.660609	13.8603	84
AIMP2.1	0.98531	11.5868	84
AIP	0.985763	11.3277	84
AJUBA	0.548218	12.1696	56
AK1	0.927538	4.16508	84
AK2	1.18237	-6.47017	84
AK3	0.861724	8.3129	84
AK4	1.08782	-21.9896	84
AK6	1.27197	2.81385	84
AK7	0.98605	1.12544	40
AKAP1	1.39875	-3.22385	84
AKAP10	0.987709	9.02626	84
AKAP11	0.652532	12.7223	84
AKAP12	1.29512	-3.34898	84
AKAP13	1.11366	-4.14075	84
AKAP17A	0.821074	13.3165	84
AKAP5	1.97708	-4.93149	36
AKAP7	0.473772	12.5683	84
AKAP8	1.04842	4.79095	84
AKAP8L	1.7253	-8.88508	84
AKAP9	0.66649	10.9846	52
AKNA	0.497206	13.1872	68
AKR1A1	1.43675	-11.9731	84
AKR1B1	1.34628	-21.5447	84
AKR1B10	1.14089	7.78739	84
AKR1B15	1.60082	1.6238	52
AKR1C1	0.8034	9.64069	84
AKR1C2	1.07706	6.6466	84
AKR1C3	1.18005	4.43542	84
AKR1C4	1.26273	8.86563	80
AKR7A2	1.32561	-1.32566	84
AKR7A3	0.937186	-0.30119	84
AKR7L	0.609381	13.8507	80
AKT1	1.54458	-10.0573	84
AKT2	0.822043	13.2909	84
AKT3	0.592088	2.86232	84
AKTIP	1.23508	0.278435	84
ALAD	0.879831	7.81244	71
ALAS1	1.31685	7.047	84
ALB	1.17882	9.94911	84
ALCAM	1.30137	2.31576	84
ALDH16A1	0.744445	9.0127	84
ALDH18A1	1.0369	10.6789	80
ALDH18A1.1	0.946096	11.2552	84
ALDH1A1	1.20709	9.62287	84
ALDH1A2	0.818049	-0.235708	84
ALDH1A3	1.21806	-12.5825	84
ALDH1B1	1.68787	-9.9519	84
ALDH1L1	0.991709	-4.35574	84
ALDH1L2	1.19889	3.46892	84
ALDH2	1.07068	-10.8525	84
ALDH3A1	0.420849	2.8547	32
ALDH3A2	1.76724	-12.0861	84
ALDH3B1	0.201767	8.80041	84
ALDH5A1	1.2394	-15.9061	84
ALDH6A1	1.07062	-22.1836	84
ALDH8A1	1.24841	-13.3884	84
ALDH9A1	1.57507	-14.998	84
ALDOB	1.12185	-22.7452	84
ALDOC	0.52147	11.9412	84
ALG1	1.22969	9.62616	84
ALG10B	1.17525	9.19835	32
ALG11	1.00878	2.60005	84
ALG12	0.885935	12.3078	84
ALG13	0.995119	3.6024	84
ALG14	0.943715	10.3111	80
ALG2	0.769623	12.0178	84
ALG3	1.34447	6.95551	64
ALG5	1.24061	5.72793	84
ALG6	0.86947	12.4525	84
ALG8	1.04153	8.61735	52
ALG9	0.69302	12.4761	80
ALKBH1	1.03176	10.5724	60
ALKBH2	1.15722	9.91416	32
ALKBH3	0.746885	12.9873	80
ALKBH4	0.590878	12.1995	84
ALKBH5	1.05525	3.64513	84
ALKBH6	1.09506	10.3998	48
ALKBH7	0.968247	5.65059	84
ALKBH8	0.640399	10.3604	80
ALOX5	0.809944	-4.26924	84
ALOX5AP	1.20077	10.224	80
ALPI	1.45989	5.68843	36
ALPK1	1.38849	4.61489	44
ALPK2	1.26846	8.75417	80
ALPL	0.961001	9.45268	84
ALS2	1.24041	4.88587	84
ALS2CL	2.10868	-0.903346	44
ALYREF	1.00059	12.6388	84
AMACR	0.8552	12.9768	84
AMBP	0.548519	9.93293	84
AMBRA1	0.726919	12.1942	52
AMDHD1	1.46768	-27.238	84
AMDHD2.1	1.30871	5.28821	84
AMFR	1.29638	7.72686	84
AMN	1.12748	-17.904	84
AMN1	1.44772	5.12475	36
AMOT	1.32266	5.2343	76
AMOTL1	0.693536	10.0514	84
AMOTL2	0.85472	12.704	84
AMPD2	0.54776	11.2072	84
AMPD3	0.884267	0.181255	84
AMPH	1.10854	3.99989	56
AMT	1.06882	-10.5513	84
AMZ2	1.44884	-0.427099	72
ANAPC1	1.06822	10.0375	84
ANAPC10	0.713201	12.7332	84
ANAPC11	0.980455	7.17017	56
ANAPC13	1.24752	10.6694	84
ANAPC16	0.232234	7.13024	84
ANAPC2	0.951438	9.3486	84
ANAPC4	0.646556	13.7062	84
ANAPC5	0.617912	13.7602	84
ANAPC7	1.05579	6.02545	84
ANG	0.696542	9.5383	84
ANGEL2	0.773604	13.1328	80
ANGPT2	0.903779	11.8695	84
ANGPTL2	0.655032	-5.20993	84
ANGPTL3	1.41068	2.08024	84
ANGPTL4	0.622624	10.4248	84
ANGPTL6	1.2641	4.6574	48
ANK2	1.62819	-5.15276	84
ANK2.1	0.694692	13.4175	84
ANK3	1.27684	-15.2253	68
ANK3.1	1.04327	11.6543	68
ANKFY1	0.605113	13.4921	80
ANKHD1	0.693265	-1.42644	48
ANKHD1-EIF4EBP3	0.833695	13.775	84
ANKIB1	1.28538	-1.16773	84
ANKLE2	0.679136	11.31	84
ANKMY2	1.14748	10.1308	84
ANKRD10	0.920486	12.8101	84
ANKRD11	1.43169	5.11619	80
ANKRD13A	1.2474	5.81534	84
ANKRD13D	1.33779	8.0635	36
ANKRD16	0.915298	9.27625	80
ANKRD17	0.779736	12.3618	84
ANKRD2	1.05201	6.48812	84
ANKRD22	0.922823	12.0604	72
ANKRD26	1.51923	6.10014	36
ANKRD27	1.07547	11.2638	84
ANKRD28	0.80296	9.09505	56
ANKRD36	1.68034	-0.176951	36
ANKRD39	1.10263	8.12183	72
ANKRD40	0.985186	10.722	44
ANKRD44	1.18461	-4.53921	84
ANKRD46	1.18003	9.7236	64
ANKRD49	0.677414	7.99675	76
ANKRD50	1.05287	10.9407	60
ANKRD52	0.820892	3.75636	76
ANKRD54	0.657591	11.5953	84
ANKRD6	0.56779	10.8628	52
ANKS1A	0.814909	12.9205	84
ANKS3	0.836861	12.953	84
ANKS4B	1.04525	-21.3987	84
ANKS6	1.20274	9.3816	84
ANKZF1	0.634597	8.58473	84
ANO1	0.811418	9.86226	36
ANO10	1.21133	8.85614	84
ANP32A	0.701078	13.7438	84
ANP32B	1.46305	-6.6192	84
ANP32E.1	0.758603	10.8952	44
ANPEP	1.09091	5.22319	84
ANTXR1	0.820697	5.67221	76
ANTXR2	1.32825	2.60918	76
ANXA1	0.833925	-0.465266	84
ANXA11	1.36905	3.3074	84
ANXA13	1.28944	-1.45403	84
ANXA2	1.27857	-8.7064	84
ANXA3	1.41472	-2.98204	84
ANXA4	1.09587	5.82829	84
ANXA5	0.854632	3.83602	84
ANXA6	0.74824	11.777	84
ANXA6.1	0.592863	10.3244	84
ANXA7	1.05405	9.38442	84
ANXA8L1	3.33202	-11.9216	31
ANXA9	2.30379	-12.8245	84
AOAH	1.41049	5.13697	76
AOC1	0.816906	10.8025	84
AOC3	0.93647	2.50949	84
AOX1	1.27047	0.413304	84
AP1AR	1.31135	3.60503	84
AP1B1	1.01707	6.74638	84
AP1B1.1	0.935111	11.1265	84
AP1G1	0.718432	5.77231	84
AP1G2	1.28712	1.92958	84
AP1M2.1	1.32119	5.33825	60
AP1S1	1.06273	6.85203	84
AP1S2	1.24265	6.08297	84
AP1S3	0.842643	7.28344	84
AP2A1	1.33064	7.23799	84
AP2A2	0.562772	12.5977	76
AP2A2.1	1.0028	11.0463	84
AP2B1	0.846367	13.1888	84
AP2M1	0.698193	13.4733	84
AP2S1	1.04716	11.4131	84
AP3B1	0.977105	12.4452	84
AP3B2	1.04196	9.52284	36
AP3D1	0.764638	13.4147	84
AP3M1	1.14709	9.80347	84
AP3M2	1.0386	8.76749	84
AP3S1	0.738357	13.42	84
AP3S2	1.22938	7.93731	40
AP4B1	1.28292	7.59329	84
AP4E1	0.624978	12.7537	84
AP4M1	0.890985	7.84049	84
AP4S1	1.20691	9.05498	76
AP5B1	1.1408	10.1963	84
AP5M1	0.62143	12.1802	84
AP5S1	1.02781	11.2493	84
AP5Z1	1.11106	9.80661	84
APAF1	0.668306	3.28501	84
APBA1	0.81085	8.61553	80
APBA3	1.32235	6.90081	76
APBB1	0.14371	6.6941	84
APBB1IP	0.564995	5.9461	84
APBB2	0.572464	10.0996	84
APCS	1.07307	8.16419	84
APEH	0.884834	7.59958	84
APEX1	0.919031	-4.77908	84
APEX2	0.942	11.5839	52
APH1A	1.44417	8.49614	36
API5	1.70114	0.299512	80
APIP	1.39759	5.57466	84
APLF	0.607568	9.54777	80
APLP2	0.305331	5.80191	84
APMAP	1.02929	2.05107	84
APOA1	0.99262	12.3081	84
APOA2	0.711595	13.6512	84
APOA4	0.781871	13.0789	84
APOA5	0.672751	9.62591	84
APOB	0.895849	12.5486	84
APOBEC3C	1.41641	5.29904	84
APOBEC3F	1.32809	5.39657	80
APOBEC3G	0.729937	-0.624836	84
APOBR	0.919512	4.9761	84
APOC1	1.09116	11.6672	84
APOC2	1.32522	6.76288	84
APOC3	1.15784	7.34066	84
APOC4	1.04923	10.0366	56
APOD	0.614836	13.4279	84
APOE	0.71414	-1.50238	84
APOF	1.17355	8.8618	84
APOH	0.787436	13.0673	84
APOL1	1.2081	11.4018	84
APOL2	0.344943	11.3844	84
APOL3	0.589944	13.5767	84
APOM	0.978725	12.3247	84
APOO	1.28173	-19.7724	84
APOOL	1.21766	6.43142	84
APP	0.88498	-4.85137	84
APPL1	0.592323	13.6021	84
APPL2	0.785094	12.8106	84
APRT	1.088	12.0511	84
APTX	1.11516	9.16026	84
AQP1	1.19491	5.31699	84
AQP2	1.19491	6.5966	64
AQR	0.780091	5.52491	84
ARAF	1.07588	12.804	84
ARAP1	0.937533	-2.20966	84
ARAP3	0.526608	13.3169	84
ARCN1	0.640429	10.7376	84
ARF1	1.23193	8.49037	80
ARF3	0.864232	12.1903	60
ARF4	0.957759	12.4519	84
ARF5	1.024	11.412	84
ARF6	1.1969	8.27253	84
ARFGAP2	0.67559	11.9123	84
ARFGAP3	0.8437	11.5237	84
ARFGEF1	0.677938	12.7584	84
ARFGEF2	0.545994	13.6082	84
ARFGEF3	1.03885	6.73889	84
ARFIP1	1.67433	-2.15518	68
ARFIP1.1	0.682172	11.7501	84
ARFIP2	1.4984	4.03449	84
ARFRP1	1.06052	9.64309	84
ARG1	0.834925	13.1568	76
ARG2	1.36947	4.89735	84
ARGLU1	1.28884	-1.30881	84
ARHGAP1	1.06418	-7.20033	84
ARHGAP10	0.578731	12.8027	84
ARHGAP12	0.82247	11.9213	72
ARHGAP15	1.14697	-9.12188	84
ARHGAP17	0.68603	13.179	84
ARHGAP18	0.961967	11.7961	84
ARHGAP21	0.624831	11.9906	84
ARHGAP22	1.36875	7.44879	52
ARHGAP23	0.955011	7.21301	68
ARHGAP24	1.08837	0.800946	72
ARHGAP26	1.0623	11.799	84
ARHGAP27	1.09057	11.8604	84
ARHGAP28	1.40285	3.4602	64
ARHGAP29	1.34291	-10.7556	84
ARHGAP30	1.29205	0.368894	84
ARHGAP31	0.68389	10.8788	84
ARHGAP32	0.982684	12.5707	84
ARHGAP35	1.19766	4.78324	84
ARHGAP4	1.1518	2.98919	84
ARHGAP42	0.655374	10.6409	84
ARHGAP44	0.997993	9.45908	60
ARHGAP45	1.25279	-7.05403	84
ARHGAP5	1.08028	11.2916	84
ARHGAP6	0.67207	13.7416	84
ARHGAP8	1.19651	10.7221	84
ARHGAP9	1.09113	7.66982	84
ARHGDIA	0.598455	12.9734	84
ARHGDIB	1.28256	-9.11356	84
ARHGEF1	1.08854	-13.9665	84
ARHGEF10	0.931941	-0.335945	84
ARHGEF10L	1.103	8.11178	84
ARHGEF12.1	1.01923	10.9182	72
ARHGEF15	1.07102	11.4732	76
ARHGEF16	1.36375	-1.05561	84
ARHGEF17	0.639946	13.6916	84
ARHGEF18	1.12287	5.24568	84
ARHGEF2	0.95856	-9.1865	84
ARHGEF28	1.211	4.213	84
ARHGEF35	0.923692	11.2793	52
ARHGEF37	0.524901	8.11408	84
ARHGEF40	0.879047	5.59009	84
ARHGEF5	1.10099	7.91411	84
ARHGEF6	1.3332	-6.45742	84
ARHGEF7	0.431597	12.5158	84
ARID1A	1.13019	-5.19045	84
ARID1B	0.978964	7.62423	84
ARID2	0.782404	7.10256	84
ARID3A	2.07283	-5.88147	48
ARID4A	0.972762	10.0867	84
ARID4B	1.84676	-13.4329	84
ARID5B	1.05924	10.5969	44
ARIH1	0.892672	12.4041	84
ARIH2	1.78299	-0.15787	44
ARL 1.00	0.91047	12.7233	84
ARL14EP	1.39455	2.51723	84
ARL 15.00	1.0507	11.5345	84
ARL 2.00	1.82237	0.0255128	84
ARL2BP	0.705065	10.4448	84
ARL 3.00	0.955922	12.7658	84
ARL4C	1.17964	9.0899	32
ARL5A	0.680659	6.30533	52
ARL5B	1.0163	9.07888	48
ARL 6.00	2.02702	1.27606	80
ARL6IP1	1.00914	4.25925	84
ARL6IP4	1.03897	10.6052	76
ARL6IP4.1	0.465722	11.1767	44
ARL6IP5	0.951143	12.4035	84
ARL6IP6	0.583442	13.0271	72
ARL8A	1.15892	10.1646	84
ARL8B	0.704934	13.3506	84
ARMC1	0.904182	1.91673	84
ARMC10.1	0.855811	8.49012	76
ARMC5	0.713105	10.0651	84
ARMC6	0.281089	7.14437	84
ARMC8	0.881176	13.3678	84
ARMC9	0.647987	11.9249	52
ARMCX1	0.625019	11.6831	84
ARMCX2	1.06661	11.0528	84
ARMCX3	1.07146	7.36552	84
ARMCX5	1.2759	8.97512	48
ARMCX6	0.786506	9.25589	48
ARMH3	0.651125	13.2639	84
ARMT1	1.65245	-10.6346	84
ARNT2	1.54648	6.42161	32
ARNTL	1.22739	8.36215	40
ARPC1A	0.809945	-11.9367	84
ARPC1B	1.01221	-3.78174	84
ARPC2	0.908854	1.47723	84
ARPC3	0.847792	11.3749	84
ARPC4	0.55963	10.6263	84
ARPC5	0.924035	2.70297	84
ARPC5L	1.09798	8.7811	84
ARPIN	0.495879	10.8135	76
ARPP19	0.663318	12.1093	84
ARRB1	1.1013	-7.38628	84
ARRB2	0.884021	9.477	84
ARRDC1	0.443021	-3.38735	84
ARSA	0.975775	10.3311	84
ARSB	0.902368	12.6975	84
ARSD	1.37569	6.65487	84
ARSE	1.29906	5.16895	84
ARSF	1.30818	6.73304	84
ARSK	1.14782	9.35062	60
ART3	1.18779	9.57262	68
ARV1	1.08802	-7.33996	51
ARVCF	1.22639	7.36165	84
AS3MT	1.27936	3.08676	84
ASAH1	0.989991	10.7246	84
ASAP1	0.729725	-1.1589	84
ASAP2.1	1.1285	10.3719	84
ASAP3	0.957488	11.057	84
ASB13	1.18287	3.01187	84
ASB6	1.15275	10.0554	44
ASB9	1.18067	2.51515	84
ASCC1	0.443213	7.64702	84
ASCC2	1.22818	7.72694	84
ASCC3	0.894762	-5.6617	84
ASDURF	0.630647	13.9281	84
ASF1A	1.07981	11.221	84
ASGR2	0.752188	11.5701	52
ASH2L	1.05126	8.32917	84
ASL	1.74614	-16.6067	84
ASMTL	1.0034	12.1097	84
ASNA1	1.2445	3.10192	84
ASNS	1.116	0.789679	84
ASPA	1.08069	-0.0394174	84
ASPDH	1.16887	-18.8352	84
ASPG	1.08094	9.89832	84
ASPH	0.8786	9.39431	84
ASPN	1.02409	12.8511	84
ASPSCR1	1.02191	8.95342	84
ASRGL1	0.962523	11.7933	84
ASS1	1.11051	-20.9289	84
ASTN2	0.755192	-3.1273	84
ATAD1	1.63185	-5.70917	84
ATAD2	1.47949	-0.174782	40
ATAD3A	1.39258	-7.73608	84
ATE1	0.808138	13.3428	80
ATE1.1	1.11924	11.5254	84
ATF1	0.475462	10.8452	84
ATF2	1.01841	4.57727	84
ATF6	0.716934	8.94223	32
ATF7	0.663991	1.92525	84
ATF7IP	0.988387	6.81165	84
ATG101	0.721025	13.539	84
ATG12	0.668628	13.749	84
ATG14	0.907887	10.928	84
ATG2A	1.05725	8.4762	84
ATG2B	1.08441	10.1576	84
ATG3	0.773722	12.5778	84
ATG4A	0.950503	4.05393	80
ATG4B	1.18476	7.9619	84
ATG4C	1.12406	8.70155	80
ATG5	0.92363	13.5673	84
ATG7	0.468913	13.7913	84
ATG9A	0.415105	10.41	84
ATIC	0.539337	13.7512	84
ATL1	0.0374093	7.27619	84
ATL2	1.33832	4.51538	80
ATL3	1.24318	7.92177	84
ATM	0.662343	13.6182	84
ATN1	1.77293	6.069	76
ATOX1	1.84055	-13.8288	84
ATP11A	1.31198	8.46115	84
ATP11B	0.854415	13.1019	84
ATP11C	0.449418	5.69567	52
ATP13A1	0.602017	13.7886	84
ATP13A3	1.03105	11.9426	84
ATP1A1	0.957744	8.68825	84
ATP1B1	0.834611	6.27691	84
ATP1B3	0.891487	10.036	84
ATP23	1.15877	7.54217	84
ATP2A2	0.796455	13.1161	84
ATP2A3	0.922758	10.4215	84
ATP2B1	1.25845	8.22642	84
ATP2B2	1.72784	4.19997	32
ATP2B4	0.966343	12.6665	84
ATP2C1	0.610923	13.788	84
ATP5F1A	1.61292	-22.8892	84
ATP5F1B	1.08827	-20.4531	84
ATP5F1C	0.877001	-13.5432	84
ATP5F1D	1.18502	-17.2995	84
ATP5F1E	1.40391	-1.97647	84
ATP5IF1	0.916006	8.37887	84
ATP5MC2	1.44351	3.06833	79
ATP5MD	1.02363	8.81934	84
ATP5ME	1.12841	4.58174	84
ATP5MF	1.04544	7.94036	76
ATP5MF-PTCD1	1.10522	-0.399214	84
ATP5MG	1.27369	0.107275	84
ATP5MPL	1.23813	-1.79712	84
ATP5PB	1.00025	2.01051	84
ATP5PD	1.05292	0.286162	84
ATP5PF	1.03352	-9.72476	84
ATP5PO	1.00984	-17.1585	84
ATP5S	1.03639	6.0571	84
ATP6AP1	0.603116	11.7908	84
ATP6AP2	0.833056	11.0955	84
ATP6V0A1	1.45466	6.27427	58
ATP6V0A1.1	1.16511	10.1053	84
ATP6V0A2	0.879255	12.9941	84
ATP6V0A4	1.0475	11.523	84
ATP6V0C	1.15648	10.6631	84
ATP6V0D1	1.26956	-1.07416	84
ATP6V0D2	1.34223	7.14236	84
ATP6V1A	1.07626	-8.80678	84
ATP6V1B1	1.45975	5.39883	84
ATP6V1B2	1.46723	-15.9363	84
ATP6V1C1	1.57249	-16.4626	84
ATP6V1C2	0.615307	10.5269	32
ATP6V1D	1.13226	-14.8042	84
ATP6V1E1	1.17004	-14.2321	84
ATP6V1F	1.147	-10.0807	84
ATP6V1G1	1.10698	-0.88894	84
ATP6V1G2	1.23096	7.03395	84
ATP6V1G3	0.724757	12.8549	84
ATP6V1H	1.28377	-11.7702	84
ATP7A	0.907916	11.3603	84
ATP8B1	0.810237	6.03608	52
ATP9A	0.92063	8.64043	84
ATP9B	0.80645	12.2642	84
ATPAF1	0.930913	-12.0145	84
ATPAF2	1.08638	-2.62754	84
ATR	0.66462	12.9182	76
ATRAID	1.11562	10.661	84
ATRIP	1.34373	8.0669	32
ATRN	1.28972	7.4089	84
ATRX	1.02661	5.81066	76
ATXN1	1.12221	-1.47669	77
ATXN10	0.957157	4.86769	84
ATXN1L	0.929959	8.48694	84
ATXN2	0.8295	12.0914	84
ATXN2L	1.19729	10.2614	84
ATXN3	0.949682	10.3769	84
ATXN7	1.00201	10.7461	52
ATXN7L3	1.93001	5.17697	32
ATXN7L3B	0.812814	11.7871	84
AUH	1.10867	-11.2473	84
AUP1	1.04754	11.5642	84
AURKAIP1	1.1013	10.8198	72
AUTS2	0.939075	11.5158	56
AVEN	0.915214	7.36507	84
AVL9	0.546471	13.6901	84
AXL	1.16472	8.49893	32
AZGP1	0.732587	10.8924	84
AZI2	1.27085	3.30824	84
AZU1	0.7127	12.9005	84
B2M	0.803454	7.67068	84
B3GALT6	2.43133	-2.6058	36
B3GAT3	0.907226	12.6666	84
B3GLCT	1.07179	5.86513	84
B3GNTL1	0.0930377	5.59495	40
B4GALT1	1.18544	9.00981	84
B4GALT3	1.21051	6.84975	36
B4GALT4	0.726455	12.4839	84
B4GALT7	0.866801	9.20811	76
B4GAT1	1.02759	11.7396	84
B9D1	0.746144	-4.64519	84
B9D2	0.963229	9.4853	60
BABAM1	0.648273	12.9407	84
BABAM2	1.18805	5.89325	84
BACH1	0.790843	7.56587	84
BAD	1.29092	-2.81619	84
BAG1	0.713301	9.88894	84
BAG2	0.880696	-18.9628	84
BAG3	1.59464	3.90169	84
BAG4	0.720847	13.4683	80
BAG5	1.21646	2.61731	84
BAG6	1.82147	-7.24856	84
BAIAP2	0.925394	-12.0579	84
BAIAP2L1	0.945045	3.90865	84
BAIAP2L2	1.01654	1.94137	84
BAK1	0.871871	11.1427	84
BANF1	1.34036	2.59181	84
BANP	1.16413	7.601	68
BAP1	0.4841	10.5191	60
BARD1	0.887351	12.061	84
BASP1	1.16962	6.86927	84
BAX	0.901037	12.9645	84
BAZ1A	0.821188	12.7048	84
BAZ1B	1.16885	-19.2499	84
BBIP1	0.484837	10.3496	76
BBOX1	0.948609	1.17502	84
BBS1	0.69097	13.4329	84
BBS10	1.07122	9.8829	32
BBS2	0.665189	14.1312	84
BBS4	1.17492	7.44915	84
BBS5	0.665153	10.5368	76
BBS7	0.576092	5.59206	84
BBS9	0.652155	12.319	72
BBX	0.666579	12.6913	84
BCAM	1.26031	8.26889	84
BCAP29	0.897038	8.06991	44
BCAP31	0.662193	11.9805	84
BCAR3	1.21874	-7.08907	84
BCAS2	1.12461	-5.1635	84
BCAS3	1.87151	-5.82301	64
BCAS3.1	0.356761	12.0664	52
BCAT1	1.02737	-1.0272	84
BCAT2	0.0729193	7.40633	84
BCCIP	1.29102	6.53607	32
BCCIP.1	0.928445	12.5376	84
BCHE	0.770971	12.9767	84
BCKDHA	0.808948	-1.28147	84
BCKDHB	0.679329	2.90446	84
BCKDK	0.988633	6.85373	84
BCL10	1.02619	4.40821	84
BCL11B	0.439393	11.6822	55
BCL2	1.0291	12.9167	76
BCL2L1	1.25723	7.78256	84
BCL2L11	0.935355	9.77238	56
BCL2L13	1.0366	2.86856	84
BCL3	1.27179	7.01937	48
BCL7A	0.399678	13.6192	84
BCL7B	1.05463	7.43588	84
BCL7C	0.848753	7.42149	44
BCL9L	1.18668	0.092999	84
BCLAF1	0.746613	10.2854	76
BCLAF1.1	1.22301	4.66761	76
BCLAF3	1.05454	6.10582	32
BCO1	1.60224	4.01232	40
BCR	1.10284	8.79093	84
BCS1L	1.21261	0.996564	84
BDH1	1.26395	-3.49068	84
BDH2	1.25385	-5.66986	84
BECN1	1.14553	10.1443	84
BEND3	1.23393	4.86861	52
BEND7	0.721301	11.9265	68
BET1	1.06591	10.0812	84
BET1L	0.758572	13.0137	84
BGN	0.777255	0.96561	84
BHMT	1.34257	-8.67869	84
BHMT2	1.40866	-12.5353	84
BICC1	1.07482	7.00193	84
BICD1	0.813285	11.1323	84
BICD2	1.47243	-9.36842	84
BICDL1	1.27476	8.89079	48
BICRA	1.31084	8.08388	40
BID	0.79303	13.7613	84
BIN1.1	0.997338	11.5379	84
BIN2	0.932167	3.39617	84
BIN3	0.621403	12.687	84
BIRC2	0.837237	12.4135	84
BIRC3	1.15244	-2.62429	40
BIRC6	0.999933	6.92824	84
BLMH	1.16925	-2.26941	84
BLNK	1.35908	5.77319	84
BLOC1S1	0.726636	12.3779	84
BLOC1S2	0.829564	4.77746	84
BLOC1S3	1.47191	2.00803	84
BLOC1S4	0.796586	11.439	84
BLOC1S5	1.09506	6.7424	84
BLOC1S6	0.721069	3.33804	84
BLVRA	0.506236	10.5293	84
BLVRB	1.07565	1.05352	84
BLZF1	1.07659	5.88216	68
BMF	0.714837	7.9649	56
BMP1	1.00129	9.06497	32
BMP2K	0.859154	8.95654	84
BMPR2	1.09647	10.3915	68
BMS1	0.640351	11.0437	84
BMX	0.993515	7.48029	32
BNC2	2.14554	-5.51236	32
BNIP1	1.25	6.27926	84
BNIP2	0.647439	5.42905	52
BNIP2.1	1.11864	-0.983367	48
BNIP3	1.08134	4.42812	84
BNIP3L	1.51321	3.28179	64
BOD1	0.152834	7.75042	84
BOD1L1	1.4671	-8.13768	84
BOK	1.00095	11.2331	80
BOLA1	0.874189	13.3513	84
BOLA2	0.31275	10.076	84
BOLA3	1.14	-8.07129	84
BOP 1.00	0.778949	10.0034	84
BORCS5	0.892609	11.8456	84
BORCS6	0.970021	10.2455	84
BORCS7	1.39925	6.5943	84
BORCS8	1.62646	-3.00158	48
BPGM	0.747165	13.285	84
BPHL	1.37506	-14.7329	84
BPI	0.851883	7.19548	80
BPNT1	0.778725	10.7141	84
BPTF	1.00831	2.79127	36
BRAF	0.144508	8.46276	84
BRAP	0.598571	12.1859	84
BRAT1	1.33742	6.50315	84
BRCC3	0.736432	10.0417	84
BRD1	1.25593	8.99625	72
BRD2	1.66905	-3.17352	84
BRD3	1.21533	-0.429467	84
BRD4	1.39317	-12.0987	84
BRD7	1.37869	5.85087	84
BRD8	1.45707	0.0752895	84
BRD9	1.25266	2.9571	72
BRF1	1.002	12.2187	84
BRF2	1.18788	9.44201	52
BRI3	1.07205	10.264	68
BRI3BP	0.856749	10.4187	72
BRIX1	0.541257	13.7406	84
BRK1	0.876206	12.7736	84
BRMS1	0.642363	-3.70798	56
BRMS1L	0.582952	13.3557	84
BROX	1.06644	4.42753	84
BRPF1	0.942278	12.172	84
BRPF3	0.878383	8.89759	48
BRWD1	0.970204	7.75536	32
BSCL2	1.00082	10.6672	84
BSDC1	0.731714	12.7099	84
BSND	0.864255	12.2124	84
BSPRY	0.917461	13.1535	84
BST1	0.909959	12.1567	84
BST2	0.747146	13.0961	84
BTAF1	0.529744	9.38375	84
BTBD1	0.607319	13.5899	84
BTBD10	1.07463	10.429	52
BTBD2	0.634055	7.63002	80
BTBD9	1.72428	-0.8529	44
BTD	0.929482	13.1046	84
BTF3	0.633587	11.3374	84
BTF3L4	1.12858	3.38475	84
BTN2A1	0.914016	9.61738	84
BTN3A1	1.08243	6.56861	72
BTN3A2	1.17162	9.93255	80
BTN3A3	0.841622	12.3996	84
BTNL9	1.00234	11.6675	56
BUB3	1.9274	-11.259	84
BUD13	1.22721	5.33669	84
BUD23	0.97224	12.3733	84
BUD31	1.12607	6.35187	84
BYSL	0.479463	13.7474	84
BZW1	1.00131	11.635	84
BZW2	0.755329	12.7845	84
C11orf52	1.10477	11.0405	84
C11orf54	1.29064	-12.7436	84
C11orf58	1.10615	10.2389	84
C11orf95	1.64544	6.48222	32
C11orf96	1.33202	-6.50358	84
C11orf98	1.46149	4.60093	84
C12orf10	0.866472	10.5427	84
C12orf29	0.90992	7.42222	84
C12orf4	0.882341	13.147	84
C12orf43	0.531716	10.4577	84
C12orf45	0.771841	12.7695	84
C12orf57	1.05842	12.1647	84
C12orf65	1.04661	7.6701	72
C12orf66	0.993789	7.90667	76
C12orf73	1.79662	-9.30737	84
C12orf75	1.02547	9.28109	84
C14orf119	0.09813	7.06013	44
C15orf40	1.58299	0.972133	84
C15orf48	0.941015	13.737	84
C16orf58	0.926428	12.6195	84
C16orf70	0.822629	10.6075	84
C16orf86	0.613884	12.2159	52
C16orf91	1.53567	-3.13514	76
C17orf49	1.28573	-8.45297	84
C17orf75	0.78175	7.89256	84
C17orf80	1.56328	4.36043	84
C17orf97	1.29609	5.28347	80
C18orf21	0.643375	12.6415	64
C18orf25	0.436956	4.8526	80
C18orf32	0.662575	11.2757	80
C19orf12	1.04147	3.99206	84
C19orf25	1.20611	9.65673	84
C19orf33	0.385791	9.32196	84
C19orf44	1.501	-0.585005	32
C19orf47	1.2604	8.73939	76
C19orf53	0.71507	7.37756	84
C19orf54	0.723085	9.74048	56
C19orf66	1.28894	-12.1239	84
C19orf70	1.12044	-9.08909	84
C1D	0.80375	12.3103	84
C1GALT1	1.10093	9.46156	84
C1GALT1C1	1.06807	11.1713	76
C1QA	0.553723	-6.24887	84
C1QB	0.42407	5.72826	84
C1QBP	1.1418	-3.00264	84
C1QC	0.177069	8.10056	84
C1QTNF3	0.181634	7.75999	84
C1QTNF5	0.784206	6.65111	84
C1R	0.945686	9.09214	84
C1RL	1.18851	9.64419	84
C1S	1.0464	4.87742	84
C1orf109	0.928128	12.371	76
C1orf116	1.49879	-1.16452	84
C1orf122	1.21706	9.98373	84
C1orf123	0.574621	7.35187	84
C1orf131	0.784163	5.38364	32
C1orf174	1.10239	11.3651	84
C1orf198	0.848441	-15.1841	84
C1orf210	1.21867	3.35451	72
C1orf226	0.903504	12.5409	84
C1orf35	0.950244	8.44564	84
C1orf43	1.05893	10.9744	48
C1orf50	1.225	4.19168	84
C1orf52	0.955947	6.73939	60
C2	1.27475	7.3607	84
C20orf194	0.776558	11.3365	60
C20orf27	1.13047	-0.0390324	84
C21orf2	1.05873	6.4825	84
C22orf39	0.971302	12.067	68
C2CD2	0.278023	8.39883	68
C2CD2L	0.875417	4.60324	84
C2CD4C	1.57833	2.08926	44
C2CD5	1.40908	5.95733	84
C2orf15	2.28474	-3.94095	32
C2orf49	2.02551	-10.3829	84
C2orf54	0.992348	10.5023	72
C2orf68	0.704701	11.5574	56
C2orf69	1.00741	9.94502	84
C2orf76	1.14377	9.02974	80
C2orf88	0.965314	11.0565	76
C3	1.33008	6.22466	84
C3orf33	1.42763	6.91253	32
C3orf38	1.30259	2.84123	84
C3orf58	0.778217	13.4185	76
C4A	1.26875	7.85501	84
C4B	1.05553	10.8181	84
C4BPA	0.759274	12.2353	84
C4BPB	0.75329	11.5082	84
C4orf19	1.33068	8.17259	36
C4orf3	0.980499	6.27507	83
C4orf33	1.06921	-4.58343	84
C5	0.712758	10.5836	84
C5AR1	0.760421	9.35119	52
C5orf15	1.17297	9.32809	64
C5orf22	0.953448	13.0399	84
C5orf24	0.661497	10.8972	84
C5orf51	0.623609	13.3774	84
C6	1.11658	11.5388	84
C6orf10	1.40484	8.20245	44
C6orf106	1.0206	10.6599	80
C6orf120	0.995373	11.0195	80
C6orf132	0.96262	9.36557	72
C6orf136	1.17788	8.0884	76
C6orf203	0.7819	1.76724	84
C6orf47	1.14746	5.85265	84
C6orf89	1.22339	10.2954	72
C7	1.0006	3.43677	84
C7orf25	0.738018	13.6847	84
C7orf26	1.16421	11.5256	72
C7orf43	0.739909	13.5013	84
C7orf50	0.656382	11.3352	84
C8A	0.724995	12.0421	84
C8B	0.849721	11.9681	84
C8G	1.06331	11.2005	84
C8orf33	0.576997	14.0979	84
C8orf37	0.818408	13.4895	84
C8orf59	0.975987	7.83021	84
C8orf82	1.27756	-6.83919	84
C9	1.19167	5.23147	84
C9orf16	0.91832	11.3843	52
C9orf170	0.535249	10.8056	40
C9orf40	1.08794	-4.49948	68
C9orf64	0.878909	12.6515	84
C9orf66	1.15364	-8.96592	84
C9orf72	0.767732	3.35566	32
C9orf78	0.65512	13.9905	84
CA1	0.980638	9.25748	84
CA12	0.90518	2.49993	84
CA13	0.733598	13.3752	84
CA2	0.623128	5.59885	84
CA3	0.603887	13.1883	84
CA4	1.27997	6.34476	84
CA5B	1.64989	2.66112	84
CA8	1.02589	-9.87658	84
CA9	0.948957	6.64373	84
CAAP1	0.571446	13.8146	84
CAB39	0.964692	10.2444	84
CAB39L	1.69629	-6.85115	84
CABIN1	0.816569	13.3526	80
CABLES1	1.14478	8.86369	84
CACFD1	1.10116	6.64581	60
CACHD1	1.84871	3.78606	40
CACNA2D1	1.35013	8.75119	84
CACNG6	1.03332	10.9577	72
CACTIN	0.823857	12.993	84
CACUL1	0.674177	13.1093	84
CACYBP	1.00982	12.1297	84
CAD	0.222981	-5.28263	84
CADM1	0.593107	0.431098	84
CADM4	1.18422	1.42289	84
CADPS2	0.124932	7.89067	84
CALB1	1.21026	-10.1643	84
CALB2	0.699558	10.1318	68
CALCOCO1	0.325195	1.44815	84
CALCOCO2	0.857253	13.2022	84
CALCRL	0.750007	13.6811	84
CALD1	1.01479	-4.60097	84
CALD1.1	0.815416	-2.53547	83
CALD1.2	0.809266	1.22759	84
CALHM5	1.16368	10.3805	68
CALML3	1.1579	9.76491	84
CALML4	1.34482	-24.3313	84
CALR	1.35752	9.13395	84
CALU	1.02722	9.51854	84
CALU.1	1.17368	2.63289	84
CAMK1	0.699819	11.8139	84
CAMK1D	1.09558	-11.8245	84
CAMK2B	0.813352	12.8853	72
CAMK2D	0.964959	12.4546	80
CAMK4	1.53025	3.06425	68
CAMKK1	1.35756	7.8848	32
CAMKMT	0.734696	13.0254	72
CAMLG	0.773792	13.6971	84
CAMP	1.0981	7.9281	84
CAMSAP1	0.96355	2.56427	84
CAMSAP2	0.870371	5.79852	84
CAND1	0.447477	11.1429	84
CAND2	1.16184	9.76415	84
CANT1	1.43909	3.48889	84
CANX	0.975126	9.84318	84
CAP1	1.01157	7.41602	84
CAP2	0.506388	13.7752	84
CAPG	0.89173	13.4122	84
CAPN1	0.886039	-1.14006	84
CAPN15	0.374263	13.7342	84
CAPN2	0.335033	13.1369	84
CAPN5	1.12059	11.266	84
CAPN6	1.31201	2.4655	48
CAPN7	0.334298	9.22935	84
CAPNS1	0.745935	12.2085	84
CAPRIN1	1.08074	4.90227	84
CAPS	1.1733	4.00571	84
CAPZA1	1.00249	-0.553611	84
CAPZA2	0.75903	10.7415	84
CAPZB	1.13619	8.47188	32
CAPZB.1	1.6725	0.296549	84
CARD10	0.71213	9.46113	84
CARD11	1.32302	3.41467	84
CARD16	0.863895	12.4089	80
CARD19	1.23678	5.20178	84
CARD6	0.915638	11.4372	60
CARD8	1.15237	10.7938	84
CARD9	0.709588	9.52157	48
CARHSP1	0.975367	12.5262	84
CARM1	1.0134	1.08987	84
CARMIL1.1	0.986954	12.5409	84
CARNMT1	0.99836	7.64213	84
CARS	0.881408	11.3304	84
CARS2	1.26531	-9.30648	84
CASC3	1.09222	11.3635	84
CASC4	1.21787	8.82931	84
CASK	0.876548	11.8884	84
CASKIN2	0.630852	13.5284	84
CASP1	1.03552	1.24336	84
CASP10	0.721998	12.9923	84
CASP2	1.00356	5.51303	84
CASP3	1.28324	-7.80593	84
CASP4	0.673134	8.38208	84
CASP6	0.9869	11.0466	84
CASP7	1.12997	9.90255	84
CASP9	1.39599	6.13534	84
CASR	0.877577	12.3759	84
CAST	1.05059	-6.33921	84
CAST.1	1.00959	9.37268	84
CASTOR1	1.81775	2.56923	56
CASTOR2	0.879181	12.0405	80
CAT	0.962033	3.4977	84
CAV1	0.870818	13.4326	84
CAV2	1.14895	11.7164	84
CAVIN1	1.08805	-2.88301	84
CAVIN2	0.519644	5.49544	84
CAVIN3	1.02489	4.28605	84
CBFB.1	1.56506	-1.59323	80
CBL	1.08468	4.06693	84
CBLB	0.97513	10.6071	64
CBLL1	0.969187	9.20886	84
CBR1	0.61554	13.5636	84
CBR3	0.993094	9.59426	84
CBR4	1.0522	-6.8113	84
CBX1	1.0772	2.35967	84
CBX3	1.00014	-6.43035	84
CBX4	1.34888	-4.45414	72
CBX5	1.46504	-6.08394	84
CBX6	0.759704	5.80335	32
CBX7	1.48767	7.25624	48
CBX8	1.12489	7.04227	84
CC2D1A	1.17931	7.79132	84
CC2D1B	0.897296	13.1475	84
CC2D2A	0.861361	5.42123	36
CCAR1	1.19265	-4.2833	84
CCAR2	0.916459	6.40221	84
CCDC102A	1.02196	3.28003	84
CCDC106	1.09763	8.6405	52
CCDC115	0.875355	13.4053	84
CCDC117	0.688698	5.09915	84
CCDC12	1.01583	7.95856	84
CCDC120	1.4509	5.48611	48
CCDC124	0.28697	9.41391	84
CCDC127	0.66908	14.0713	84
CCDC130	1.38167	6.15	76
CCDC134	0.785066	10.5153	84
CCDC149	1.39182	7.86254	40
CCDC174	0.225638	9.46644	72
CCDC182	1.49686	-8.59548	52
CCDC186	0.851917	12.6142	84
CCDC22	1.49795	-0.886835	84
CCDC25	0.846053	7.00919	84
CCDC28A	1.10688	11.0316	84
CCDC32	0.898185	8.87982	80
CCDC39	1.44439	6.2297	44
CCDC43	1.04092	10.571	84
CCDC47	1.06483	6.31827	84
CCDC50	0.877758	2.17891	84
CCDC51	1.33936	1.49655	84
CCDC58	1.1419	-2.55917	84
CCDC6	0.686062	10.0817	84
CCDC61	1.1866	8.65989	76
CCDC65	0.994963	-9.91577	79
CCDC69	1.03692	3.75818	40
CCDC71L	1.53584	6.79255	32
CCDC77	1.25881	8.00603	32
CCDC8	1.2491	7.5116	84
CCDC80	1.05256	8.26681	80
CCDC82	1.02891	7.93243	80
CCDC85B	1.10402	5.87425	52
CCDC85C	0.622319	9.80793	68
CCDC86	2.16482	-7.46708	84
CCDC88A	1.693	-9.58215	84
CCDC88B	0.720393	12.7393	76
CCDC88C	1.12718	11.1805	84
CCDC9	0.9162	0.00839559	84
CCDC90B	1.22978	-6.85908	84
CCDC91	0.80625	11.2512	80
CCDC92	0.45667	10.3094	84
CCDC93	1.35945	-3.98412	84
CCDC97	0.958131	11.609	84
CCDC9B	1.02683	11.3537	84
CCL14	1.49284	1.99712	84
CCL16	0.758037	12.1572	52
CCL18	0.636062	10.4061	76
CCL21	1.08124	0.145637	56
CCL5	1.20764	5.71875	80
CCM2	1.25484	8.45825	84
CCNC	0.703674	11.2288	56
CCND1	0.738865	13.394	80
CCNDBP1	1.00666	9.26876	52
CCNH	0.6726	13.5548	84
CCNK	0.882256	12.2169	84
CCNL1	1.22016	8.73364	52
CCNL2	1.28243	0.504099	56
CCNT1	0.836697	0.117159	84
CCNT2	0.671142	-0.157142	68
CCNY	1.42471	7.26759	84
CCNYL1	0.727019	12.4837	68
CCP110	0.84259	9.53694	64
CCPG1	1.11712	10.3676	64
CCS	0.91133	10.9123	84
CCSER1	1.23899	9.97823	60
CCSER2	1.11231	9.89693	52
CCT2	1.16207	11.0914	84
CCT3	1.62479	-1.70294	84
CCT4	1.08019	10.9159	84
CCT5	1.48069	3.49766	84
CCT6A	1.23229	8.00258	84
CCT6B	1.24805	5.94748	84
CCT7	1.53712	3.20989	84
CCT8	1.08307	11.389	84
CCZ1	0.528728	13.6137	84
CD109	0.142666	7.3808	84
CD14	1.18343	-1.03623	84
CD151	0.752178	12.8672	84
CD163	1.35423	3.98665	76
CD163L1	1.05388	9.26281	32
CD180	1.13397	11.6447	84
CD2	1.17685	-2.5478	84
CD200	0.750222	11.1933	76
CD209	1.10011	5.87773	76
CD248	0.762174	13.5834	84
CD276	0.979242	11.0453	84
CD2AP	0.805204	13.1469	84
CD2BP2	0.46019	8.23852	84
CD300A	1.39859	7.78506	48
CD320	0.627395	8.71653	48
CD34	0.995409	11.5398	80
CD36	0.871658	5.17755	84
CD38	0.653018	12.1755	84
CD3D	1.40112	7.16205	32
CD3E	1.26215	8.46634	52
CD3G	0.769811	8.86355	32
CD4	0.554459	7.69537	84
CD40	1.20541	9.02262	84
CD44	0.500036	13.2663	84
CD46	1.61925	3.83609	56
CD46.1	0.961604	9.13014	84
CD47	1.16599	10.6755	84
CD48	0.654952	12.6523	68
CD5	1.38715	3.59309	40
CD53	1.07513	8.09073	60
CD55	1.50703	-2.10468	84
CD58	1.28455	8.09364	80
CD59	0.679508	13.4346	84
CD5L	0.829625	9.42562	84
CD63	0.786082	10.4655	84
CD68	0.663064	10.3043	40
CD70	0.786219	9.08274	84
CD74	1.03562	8.79337	84
CD81	0.501769	13.3391	84
CD82	1.05094	3.83489	84
CD83	1.28844	8.31025	32
CD84	1.03576	5.98725	60
CD8A	1.12101	10.8167	52
CD9	0.873897	11.8949	84
CD93	1.39477	7.2822	84
CD99	0.701297	12.5823	84
CD99.1	0.613232	13.7521	84
CD99L2	1.47382	4.99935	84
CDA	0.511468	13.8316	84
CDADC1	1.2334	7.21796	68
CDAN1	1.29324	8.41555	44
CDC123	0.876437	11.7067	76
CDC14A	1.31969	7.80159	44
CDC16	0.604905	13.8651	84
CDC23	0.555138	13.1089	84
CDC26	0.8015	11.2086	52
CDC34	0.701474	12.8346	84
CDC37	1.47785	-3.53236	84
CDC37L1	0.725735	13.5941	84
CDC40	1.23693	1.16666	84
CDC42	1.17483	9.76315	84
CDC42BPA	0.631775	12.8372	80
CDC42BPB	0.973149	11.9016	84
CDC42BPG	0.989413	5.77983	76
CDC42EP1	0.816851	-2.62664	84
CDC42EP2	0.638764	8.08406	76
CDC42EP3	0.405114	3.93688	68
CDC42EP4	1.19468	-1.15105	84
CDC42EP5	1.04305	-5.77839	84
CDC42SE1	1.26571	7.16457	52
CDC42SE2	0.974222	10.4215	80
CDC5L	1.97459	-20.8125	84
CDC73	1.9407	-15.0526	84
CDCP1	0.845528	13.4164	80
CDH1	0.790689	7.83	84
CDH11	0.861681	11.1148	84
CDH13	0.422261	9.99367	84
CDH16	0.973947	2.43308	84
CDH2	1.18395	0.987332	84
CDH4	0.49641	11.2971	40
CDH5	0.721719	13.8287	84
CDH6	1.20833	2.42156	84
CDH9	1.39173	3.0769	60
CDHR2	1.10557	-9.19145	84
CDHR5	1.11327	4.95168	84
CDIP1	1.40438	5.42547	76
CDIPT	1.23944	4.36513	84
CDK1	0.217327	7.36845	68
CDK11A	0.706783	7.43817	52
CDK11B	1.3993	4.35803	84
CDK12	0.840772	7.40538	84
CDK13	1.61099	6.18007	36
CDK13.1	0.557007	7.72751	68
CDK14	1.24905	-3.29133	84
CDK16	0.887201	13.1186	84
CDK17	0.869305	5.06515	84
CDK19	1.04871	8.08649	52
CDK2AP1	1.74762	-8.37534	84
CDK4	0.854714	12.8394	84
CDK5	1.10441	10.6283	84
CDK5RAP1	0.951109	8.66995	76
CDK5RAP2	0.808008	13.7326	84
CDK5RAP3	1.17057	10.6144	84
CDK6	0.425696	6.75517	84
CDK7	0.617977	10.6691	84
CDK9	1.16116	8.64278	84
CDKAL1	0.674159	13.9977	84
CDKL5	1.43802	4.19798	76
CDKN1A	3.18134	-17.1982	32
CDKN1B	0.636373	9.72829	84
CDKN1C	0.694006	12.6579	68
CDKN2AIP	1.03651	10.0274	84
CDKN2AIPNL	0.185827	6.37157	80
CDKN2C	0.588971	13.1073	84
CDNF	0.794271	11.5623	52
CDPF1	1.36079	7.24666	40
CDR2	0.961523	12.3115	84
CDR2L	1.0589	9.76503	48
CDS1	0.930215	9.38826	64
CDS2	0.953656	3.75659	84
CDV3	1.25187	-6.24934	84
CDYL	0.807996	6.94799	84
CDYL2	0.820307	9.38172	48
CEACAM1	0.944758	12.9957	80
CEACAM4	0.921079	11.7526	56
CEBPB	1.10384	8.07043	84
CEBPZ	0.184845	8.33382	84
CEBPZOS	0.866343	4.18751	84
CECR2	0.910593	10.8963	39
CELF1	0.46702	13.1016	84
CELSR1	0.495338	11.636	84
CELSR2	1.11088	-3.48742	84
CELSR3	1.12801	-8.6728	32
CEMIP2	0.688797	-4.12847	84
CEND1	0.78385	7.41604	32
CENPB	0.757377	4.50976	84
CENPC	0.740095	13.5127	84
CENPF	6.71751	-21.8667	39
CENPV	0.957703	12.2666	84
CEP104	0.832102	6.79739	72
CEP112	0.985514	11.7134	76
CEP120	0.842125	9.05342	80
CEP128	1.19922	10.101	64
CEP131	0.090469	10.2409	84
CEP135	0.695732	13.3833	84
CEP164	0.41031	2.0585	52
CEP170.1	0.766308	13.2769	72
CEP170B.1	0.922936	10.9669	72
CEP192	0.94765	11.7348	72
CEP250	1.06121	8.47641	84
CEP290	0.941052	9.19891	56
CEP350	0.952804	11.8418	84
CEP41	1.49716	-1.86494	84
CEP44	0.991021	12.7891	84
CEP57	0.975813	9.08791	72
CEP63	1.10368	8.7847	36
CEP68	0.772529	13.4038	84
CEP78	0.488596	11.867	56
CEP85	1.9981	-1.71628	44
CEP89	0.965978	11.0824	48
CEP95	2.07126	-3.96888	40
CEP97	0.805973	13.1483	80
CEPT1	0.897378	12.3364	80
CERS2	1.14194	10.2436	84
CERS4	1.05529	10.7364	80
CERS5	1.00619	10.9021	64
CERS6	1.00292	9.87042	48
CES1	1.55594	4.37019	64
CES2	1.11771	0.241553	84
CES3	0.945034	10.5912	80
CETN2	0.966481	12.3097	84
CETN3	0.970615	11.0188	84
CETP	1.03972	12.3238	84
CFAP20	0.816501	9.22533	84
CFAP298	1.05962	12.4178	84
CFAP36	1.01772	12.1053	84
CFAP97	1.11565	9.99614	80
CFB	1.13644	12.0145	84
CFD	1.27527	7.3716	84
CFDP1	0.739569	13.4734	84
CFH	1.21156	6.6923	84
CFHR1	0.958296	11.9933	84
CFHR2	0.874374	12.3076	84
CFHR3	1.40883	4.65692	84
CFHR4	1.075	10.7596	80
CFHR5	1.01087	12.2131	84
CFI	0.978309	11.3296	84
CFL1	1.01504	1.89829	84
CFL2	0.683584	10.8194	84
CFP	1.24225	8.92301	84
CFTR	2.1374	-11.4753	60
CGAS	0.692218	10.1918	44
CGGBP1	1.85955	-7.89027	84
CGN	1.32177	5.53069	84
CGNL1	0.937595	-12.5242	84
CGREF1	0.871195	3.99748	80
CHAC2	1.35339	9.06185	68
CHAD	1.04907	12.0405	84
CHAF1A	0.889872	12.9658	70
CHAMP1	0.945313	1.09166	84
CHCHD1	1.26012	-3.28956	84
CHCHD10	0.404655	9.98146	84
CHCHD2	0.938593	8.55856	84
CHCHD3	1.16143	-9.88745	84
CHCHD4	1.03122	-8.10763	84
CHCHD5	0.76121	13.659	84
CHCHD6	0.722417	9.51738	84
CHCHD7	0.974555	0.803449	84
CHD1	1.03431	-15.95	84
CHD1L	1.05741	12.075	84
CHD2	0.915244	7.60878	84
CHD3	1.26131	0.690194	84
CHD4	1.06768	-8.18909	84
CHD8	0.956939	13.0907	80
CHD9	0.455664	10.9265	40
CHDH	1.52235	-25.3304	84
CHEK1	0.588697	10.486	32
CHEK2	0.892049	7.45082	80
CHERP	1.17136	0.958428	84
CHGA	1.09743	2.38048	72
CHGB	1.03241	10.7264	48
CHI3L1	0.645364	1.46271	84
CHID1	0.776173	11.1977	84
CHIT1	1.07097	11.4183	84
CHKA	1.16112	10.3116	56
CHKB	0.718042	13.708	84
CHL1	1.0082	11.5047	60
CHM	0.75115	10.507	84
CHML	1.11871	11.7366	72
CHMP1A.1	0.663107	11.481	84
CHMP1B	0.995418	-16.6748	84
CHMP2A	1.17126	-11.9432	84
CHMP2B	0.710467	11.5497	84
CHMP3	0.872214	12.8381	84
CHMP4A	0.319687	3.903	84
CHMP4B	0.961069	-2.47082	84
CHMP4C	2.08901	-22.3968	84
CHMP5	1.65305	-11.1045	84
CHMP6	1.3757	5.8178	84
CHMP7	1.074	4.16512	84
CHN1	0.986996	10.2983	36
CHN2	1.38314	6.37487	72
CHORDC1	0.964236	10.8597	84
CHP1	0.79063	7.69315	84
CHPF	1.55246	0.307149	32
CHPF2	0.919619	10.2275	56
CHPT1	1.92259	3.2372	52
CHRAC1	1.20981	8.84307	84
CHST12	1.20719	7.60385	32
CHST13	1.00776	9.08232	52
CHST14	0.612739	12.2938	76
CHSY1	2.16777	2.53305	56
CHTF18	1.50203	-4.62359	32
CHTOP	0.990878	12.3339	84
CHUK	0.88287	8.8156	84
CHURC1	0.797238	10.0604	84
CIAO1	0.591776	12.3359	84
CIAO2A	0.833275	13.3188	84
CIAO2B	1.10112	10.1592	84
CIAO3	1.02891	-3.63484	84
CIAPIN1	0.669188	12.661	84
CIB1	1.16789	8.7316	84
CIC	1.03985	0.217586	84
CINP	0.667567	13.2241	84
CIP2A	0.961393	-6.96192	52
CIR1	0.748896	5.75538	84
CIRBP	0.816569	12.1477	84
CISD1	1.12018	-7.49138	84
CISD2	1.18108	9.97709	84
CISD3	1.21162	0.298571	84
CIT	0.776998	10.3262	84
CIZ1	0.874167	12.6665	84
CKAP4	1.04906	7.00914	84
CKAP5	0.52254	13.6169	84
CKB	1.32895	3.36908	84
CKM	1.45449	3.75836	84
CKMT1A	1.67577	3.22081	84
CKMT2	1.16299	11.4864	84
CKS1B	0.876492	10.4843	64
CLASP1	0.466383	13.474	80
CLASP1.1	0.828624	13.2372	84
CLASP2	1.19649	6.24711	80
CLASP2.1	1.15298	9.55177	84
CLASRP	1.07338	8.82537	76
CLC	1.00297	0.483096	84
CLCC1	1.06447	10.1174	84
CLCN5	0.753731	3.50418	84
CLCN6	0.848571	10.8739	40
CLCN7	0.880946	11.3072	84
CLCNKA	0.820906	11.5593	60
CLCNKB	1.00295	10.1458	40
CLCNKB.1	1.20808	4.60655	36
CLDN10	1.19586	8.03516	72
CLDN2	1.23901	8.51514	84
CLDN23	0.763962	7.00039	32
CLDN3	1.51989	3.30846	84
CLDN7	1.06888	12.0631	80
CLDND1	0.778812	10.2109	60
CLEC11A	0.941293	-0.430298	84
CLEC14A	1.05912	11.5262	84
CLEC16A	1.50822	3.49011	84
CLEC3B	0.624614	11.7651	84
CLGN	1.1992	9.92269	35
CLIC1	0.630638	13.7077	84
CLIC2	0.225406	9.49855	84
CLIC3	1.13962	5.06311	60
CLIC4	1.07571	2.23065	84
CLIC5	1.08722	4.92254	80
CLIC6	0.758521	0.277466	84
CLINT1	1.38588	5.7404	56
CLINT1.1	0.903922	11.4914	84
CLIP1.1	0.390695	-0.803264	80
CLIP2	1.00221	-1.60785	76
CLK2	1.56365	4.5905	44
CLK3	1.13867	6.44675	72
CLMN	1.11493	11.0218	84
CLN3	0.982954	10.4913	48
CLN5	1.01156	12.3411	84
CLN6	1.13691	3.84279	84
CLN8	1.16163	10.3905	60
CLNK	0.100631	8.29553	36
CLNS1A	1.13948	10.2313	84
CLOCK	0.572493	12.9169	64
CLP 1	0.754143	12.4083	84
CLPB	1.04122	-7.86886	84
CLPP	1.03447	-1.49578	84
CLPTM1	1.20827	4.56453	84
CLPTM1L	0.861953	10.4935	84
CLPX	1.25515	-11.3313	84
CLRN3	1.17723	8.75898	80
CLSTN1	0.755063	13.6082	84
CLSTN3	0.857075	12.0985	60
CLTC	1.47937	3.99933	84
CLTRN	1.30289	6.79171	84
CLU	0.690366	8.49022	84
CLUAP1	1.14001	2.91305	84
CLUH	1.51911	-4.34878	84
CLYBL	1.58605	-13.0774	84
CMA1	1.07149	4.82803	84
CMAS	1.07853	6.07336	84
CMBL	1.07017	-11.5002	84
CMC1	1.09081	-6.35818	84
CMC2	1.14066	-0.41146	84
CMC4	0.735558	6.47282	84
CMIP	1.08601	6.99643	84
CMPK1	1.17185	2.03971	84
CMPK2	0.901584	12.3904	84
CMSS1	0.72665	10.3051	84
CMTM4	0.472353	10.0886	84
CMTM6	1.44796	5.98291	44
CMTR1	0.721612	8.77527	84
CMTR2	1.14159	10.1242	84
CNBP	0.564756	10.4003	80
CNBP.1	0.34177	7.03884	84
CNDP1	0.85111	9.14208	84
CNDP2	1.40878	0.957653	84
CNGA3	2.17516	-0.928444	36
CNIH4	1.12525	8.66515	84
CNKSR3	0.825184	12.3163	84
CNN1	1.09439	-7.24366	84
CNN2	1.12421	-13.7607	84
CNN3	1.03712	-12.7603	84
CNNM2	1.41044	4.02737	72
CNNM3	0.921075	11.5416	84
CNNM4	0.627263	13.3469	76
CNOT1	0.655844	13.7067	84
CNOT10	0.624494	5.31952	84
CNOT11	0.867062	12.9368	84
CNOT2	0.890455	4.83272	84
CNOT3	0.91385	6.89943	84
CNOT4	0.958028	9.40982	84
CNOT6L	1.08984	10.433	84
CNOT7	0.878129	10.1433	84
CNOT8	0.959561	10.9964	72
CNOT9	0.814054	6.24469	84
CNP	1.52074	2.1212	84
CNPY2	0.819635	13.5698	84
CNPY3	1.92485	-11.0343	84
CNPY4	1.09539	-2.43431	84
CNRIP1	1.16007	0.910881	84
CNST	1.10362	11.0041	84
CNTN1	1.00222	9.26313	76
CNTRL	1.19375	5.81305	68
CNTROB	0.446294	11.5485	80
COA1	1.23489	3.57699	84
COA3	0.76677	10.8451	84
COA4	1.35726	-8.37616	84
COA5	1.40912	0.215052	84
COA6	0.97546	-10.3965	84
COA7	0.812533	-2.34875	84
COASY	1.08926	-5.73085	84
COBL	0.865975	10.1432	32
COBLL1	0.720348	6.59212	76
COCH	1.14832	6.58149	84
COG1	0.61596	12.9761	84
COG2	0.540781	13.5295	84
COG3	0.770885	14.0591	84
COG4	0.491853	12.8811	84
COG5	1.02147	12.4708	84
COG6	1.17128	6.28674	84
COG7	1.09234	10.4744	84
COG8	0.785011	12.94	84
COIL	0.676333	11.228	84
COL12A1	0.732313	10.3085	84
COL14A1	1.02925	1.162	84
COL15A1	1.06239	3.91534	84
COL16A1	0.735461	7.87729	80
COL18A1	0.96473	7.55291	84
COL1A1	0.904128	-3.69189	84
COL1A2	0.663216	1.11502	84
COL23A1	1.17285	7.86774	75
COL2A1	0.0995089	-2.86027	72
COL3A1	0.999533	-12.2702	84
COL4A1	0.908716	5.81634	84
COL4A2	1.02229	4.36857	84
COL4A3	0.934808	13.1102	84
COL4A3BP	1.04624	11.6589	84
COL4A4	1.28073	7.67712	84
COL4A5	1.46581	4.6206	80
COL4A6	1.52019	5.40146	40
COL5A2	0.0896873	8.5422	84
COL5A3	0.960773	9.45478	84
COL6A1	0.984406	12.5033	84
COL6A2	1.32552	7.83654	84
COL6A3	1.15875	2.21338	84
COL6A3.1	1.0526	10.4122	84
COL7A1	0.407038	9.46816	48
COL8A1	0.876923	10.892	80
COL9A2	2.25989	1.32161	36
COLEC10	0.922439	7.01219	72
COLEC11	0.698225	8.22868	84
COLEC12	1.54581	6.65408	36
COLGALT1	0.596464	11.4661	84
COMMD1	1.74187	-14.2485	84
COMMD10	1.47271	-7.9729	84
COMMD2	2.07357	-24.6362	84
COMMD3	1.82887	-5.01148	80
COMMD3-BMI1	1.18367	8.10581	84
COMMD4	1.359	-14.9542	84
COMMD5	1.22814	4.45162	84
COMMD6	1.38503	6.78981	84
COMMD7	1.47991	-9.44844	84
COMMD8	1.41115	5.16584	56
COMMD9	1.49066	-6.89494	84
COMP	0.88069	7.5736	84
COMT	1.4772	-6.82302	84
COMTD1	1.74901	1.02417	84
COP 1	1.35239	8.5235	40
COPA	0.655166	11.3849	84
COPB1	0.770038	11.3677	84
COPB2	1.16979	10.551	84
COPE	1.0308	12.8921	84
COPG1	0.7718	4.53453	84
COPG2	1.09491	3.20351	84
COPRS	0.817345	11.2682	84
COPS3	1.3256	1.44011	84
COPS4	1.30929	7.40807	84
COPS5	1.19076	10.1138	84
COPS6	0.805961	12.7248	84
COPS7A	1.51013	3.52587	84
COPS7B	0.789484	13.5894	84
COPS8	0.815153	10.9621	84
COPS9	0.961784	12.8935	84
COPZ1	0.694718	8.56505	84
COPZ2	0.758286	1.94008	84
COQ10A	0.645686	13.1492	76
COQ10B	0.657705	13.283	76
COQ3	0.953015	1.73168	84
COQ4	1.1908	9.0025	72
COQ5	0.969503	3.36006	84
COQ6	0.741523	5.43032	84
COQ7	0.876666	0.162	84
COQ8A	1.07587	5.05427	84
COQ8B	0.746367	11.8559	84
COQ9	0.933782	-0.870554	84
CORO1A	1.40655	-14.997	84
CORO1B	1.13347	10.9987	84
CORO1C	0.542649	9.69085	84
CORO2A	0.732426	12.8278	80
CORO2B	0.606306	8.74273	84
CORO7	1.17374	8.9797	68
CORO7-PAM16	0.903339	-5.12827	84
COTL1	1.43365	-7.5472	84
COX11	0.891174	9.48724	84
COX15	0.914455	8.64483	84
COX16	1.44125	2.10537	40
COX17	0.573729	13.6953	84
COX18	1.09187	7.25936	84
COX19	0.357875	7.79472	84
COX20	1.13087	8.15032	84
COX4I1	0.999366	0.875659	84
COX5A	1.10896	-11.1216	84
COX5B	1.01047	-8.81999	84
COX6A1	0.930082	-3.91038	84
COX6B1	0.680727	1.87862	84
COX6C	1.09507	-3.47201	84
COX7A1	1.12403	9.03158	84
COX7A2	0.71495	5.51424	84
COX7A2L	0.67349	10.8373	84
COX7B	0.739589	8.69671	80
COX7C	1.48936	-12.7903	84
COX8A	0.99849	1.56792	84
CP	1.17065	7.91167	84
CPA3	0.947362	6.09934	84
CPB2	0.924326	9.33353	84
CPD	0.813108	11.3159	84
CPE	1.09243	11.9808	76
CPEB3	1.37902	4.42265	72
CPEB4	1.00329	11.3929	84
CPM	1.02785	9.62494	84
CPN1	0.833151	11.7315	84
CPN2	0.862507	11.7607	84
CPNE1	1.40037	-13.4345	84
CPNE2	0.89421	11.4086	84
CPNE3	0.565704	-8.19426	84
CPNE6	1.34827	4.3807	84
CPNE8	1.07619	11.2031	84
CPOX	0.0113703	-6.6812	84
CPPED1	1.03284	11.6262	84
CPQ	1.14514	9.65553	84
CPS1	0.714154	12.8988	84
CPSF1	1.01509	2.26505	84
CPSF2	0.879857	0.511295	84
CPSF3	0.771295	5.94961	84
CPSF4	0.781608	9.34704	84
CPSF6	1.23615	-6.91138	84
CPSF7	0.763415	11.062	84
CPT1A	0.52591	12.2434	84
CPT1B	1.55275	5.24125	64
CPT2	0.863044	9.40303	84
CPTP	1.37226	5.19808	84
CPXM1	1.21783	1.87871	52
CPXM2	0.64511	12.0844	84
CR1	1.17891	9.46659	80
CR2	1.50053	3.44989	48
CRABP1	1.25916	-13.429	84
CRABP2	0.570142	11.385	80
CRACR2A	1.55263	2.09095	76
CRACR2B	0.777411	12.4731	60
CRADD	1.33807	-3.45404	84
CRAT	1.14735	-17.6511	84
CRB2	1.18728	7.67879	72
CRB3	0.896942	11.916	56
CRBN	0.550736	13.723	84
CRCP	0.541379	13.7183	80
CREB1	1.38465	2.76685	84
CREB5	1.07456	10.9272	56
CREBBP	1.00172	6.36041	84
CREG1	0.866249	8.4474	84
CRELD1	1.07249	10.1503	84
CRELD2	1.53575	-9.44921	84
CRHBP	1.20279	9.38911	84
CRIM1	1.02871	9.68121	84
CRIP1	0.452885	13.7034	84
CRIP2	1.34608	-11.6279	84
CRIPT	0.59001	11.9196	84
CRISP3	1.02901	10.6315	84
CRISPLD2	0.931127	7.81282	64
CRK	1.07454	9.55568	48
CRK.1	0.499295	12.1018	84
CRKL	0.865205	12.7646	84
CRLF3	1.79019	-9.94427	84
CRLS1	1.23048	9.63283	48
CRMP1	0.977422	-6.27194	84
CRNKL1	0.715201	11.382	84
CROCC	0.831954	10.7263	84
CROT	0.955296	6.67827	84
CRP	1.43381	1.54863	84
CRTAC1	0.727868	11.7115	84
CRTAP	0.609964	7.87708	84
CRTC1	0.507837	13.8003	84
CRTC2	0.803023	10.904	84
CRTC3	0.994041	12.333	84
CRY2	0.998683	9.1783	56
CRYAA	0.892503	10.1554	84
CRYAA2	1.00529	9.87571	56
CRYAB	0.667174	13.7285	84
CRYBB3	1.31593	6.56326	84
CRYBG1	0.000623825	8.40042	84
CRYBG3	1.43144	-4.09642	84
CRYL1	1.0631	-10.0965	84
CRYM	1.28716	-12.1852	84
CRYZ	0.997023	-8.69008	84
CRYZL1	1.18701	3.74157	84
CS	0.900651	-5.00084	84
CSAD	1.30583	1.76708	84
CSDC2	1.226	4.155	84
CSE1L	0.650586	13.4776	84
CSF1	1.25657	8.86854	48
CSF1R	0.611849	13.4559	80
CSGALNACT1	0.492528	11.3466	40
CSK	1.06807	-25.0419	84
CSNK1A1	1.08561	10.4348	84
CSNK1A1.1	1.46188	4.7587	56
CSNK1G1	1.04565	11.5095	84
CSNK1G2	1.24743	8.51124	40
CSNK1G3	1.28305	5.6019	72
CSNK2A1	0.871351	13.2833	84
CSNK2A2	1.09569	2.04446	84
CSNK2B	0.564012	12.0201	84
CSPG4	1.00201	9.59608	84
CSRP1	0.696011	-0.944099	84
CSRP2	1.09358	-19.4401	84
CST3	1.28363	7.16487	84
CST6	1.22433	8.98669	84
CST7	0.795992	10.4192	52
CSTA	0.64844	10.0633	84
CSTB	1.32459	7.68342	84
CSTF1	1.14116	4.80162	84
CSTF2	0.894219	7.69741	84
CSTF2T	1.12305	-1.62124	84
CSTF3	1.28329	-14.3758	84
CTBP2	1.16949	0.936004	84
CTBS	1.24924	8.30113	84
CTCF	0.827532	10.5931	84
CTDNEP1	1.87457	1.36948	36
CTDP1	1.22414	6.45588	84
CTDSP1	0.993694	11.7094	68
CTDSPL	0.80184	7.75696	60
CTDSPL2	1.06113	8.83496	84
CTF1	0.960262	10.6189	84
CTGF	0.809901	7.71862	84
CTH	1.28768	-9.50124	84
CTHRC1	0.644366	3.19397	84
CTIF	1.11486	2.51949	84
CTNNA1	1.0481	-12.1606	84
CTNNA2	0.954042	4.80681	32
CTNNAL1	0.702747	10.8621	84
CTNNB1	1.28336	3.29807	84
CTNNBIP1	0.857768	11.7056	56
CTNNBL1	0.815183	8.56075	84
CTNND1	1.04773	8.07272	84
CTPS1	1.0937	-0.886137	84
CTPS2	0.682953	6.3352	84
CTR9	1.03253	-3.68251	84
CTRB1	0.914647	8.49861	36
CTSA	1.14675	10.7311	84
CTSB	0.990958	11.7177	84
CTSC	1.00943	11.3429	84
CTSD	0.778559	6.99499	84
CTSF	0.529186	9.24902	84
CTSG	1.29631	-0.288811	84
CTSH	1.4442	3.87916	84
CTSL	1.98247	-14.4984	84
CTSO	0.939151	11.5495	84
CTSS	0.507092	9.44232	84
CTSW	0.912755	9.73688	36
CTSZ	0.569749	13.6776	84
CTTN	0.552174	13.8988	84
CTTNBP2	0.633934	13.2739	76
CTTNBP2NL	1.06706	-4.17583	84
CTU1	0.862066	-11.9988	84
CTU2	0.667462	13.4749	80
CUBN	1.36496	-33.8394	84
CUEDC1	0.912697	6.41995	84
CUEDC2	0.97606	11.4099	60
CUL1	0.976273	11.402	84
CUL2	0.876151	7.46828	84
CUL3	0.522972	10.9815	84
CUL4A	1.23615	5.45032	84
CUL4B	0.507138	11.3244	84
CUL5	1.14254	8.32149	84
CUL7	0.539589	13.777	84
CUL9	0.935121	8.17156	84
CUTA	1.00013	9.27159	84
CUTC	0.873474	9.37091	84
CUX1	1.12188	9.51751	84
CWC15	0.971434	7.00804	84
CWC22	1.24028	2.67255	84
CWC25	0.87526	11.6446	80
CWC27.1	0.991451	8.86538	84
CWF19L1	1.22346	9.50659	84
CWF19L2	0.880186	13.0388	84
CXADR	1.01972	10.6719	52
CXCL12	0.883357	-0.434503	84
CXCL14	0.647706	13.711	84
CXCL16	1.54379	3.2627	36
CXXC1	0.807759	9.67038	84
CXXC5	1.3012	5.77955	84
CXorf38	0.302741	5.40108	84
CXorf56	0.59626	10.5118	84
[truncated: 7,635 more rows]

## Sheet: CPTAC_CCRCC_T
	BI_mean	bic_diff_mean	N
A1BG	1.23399	3.94865	110
A1CF	1.23522	8.35102	110
A2M	1.19386	6.82119	110
AAAS	0.567225	14.8686	110
AACS	0.91348	10.0525	110
AADAT	1.52568	0.0661769	40
AAED1	1.69153	0.939316	56
AAGAB	1.16839	8.08978	110
AAK1	1.07519	11.2782	110
AAMP	0.79825	13.9823	110
AAR2	1.17506	3.00254	110
AARS	1.04004	-1.06977	110
AARS2	0.741987	12.0896	110
AARSD1	1.15023	10.7867	110
AASDH	0.920157	7.42242	36
AASDHPPT	1.04095	11.752	110
AASS	0.9707	11.6456	110
AATF	1.028	12.8306	110
ABAT	0.856549	14.3802	110
ABCA1	1.02941	11.2966	102
ABCA12	0.639347	10.4012	30
ABCA2	0.909095	12.3327	105
ABCA8	1.06778	9.86069	65
ABCB1	0.774497	10.0289	110
ABCB10	0.959793	8.70424	110
ABCB6	1.03062	12.4037	110
ABCB7	0.806004	10.3873	52
ABCB8	1.1714	5.92991	110
ABCC1	1.29276	4.87173	110
ABCC10	0.637007	3.68449	65
ABCC2	0.850864	6.43214	110
ABCC3	1.4224	4.19155	110
ABCC4	1.07027	8.01571	110
ABCC6	0.88619	10.701	110
ABCD1	1.11306	10.4904	110
ABCD3	1.43516	-2.46239	110
ABCE1	1.19358	9.30513	110
ABCF1	0.784391	6.07693	110
ABCF2	1.01034	7.99141	110
ABCF3	0.887407	10.5705	110
ABCG2	1.72981	5.49626	33
ABHD10	0.65124	7.46084	110
ABHD11	0.693795	6.83943	110
ABHD12	1.42351	2.9861	110
ABHD13	0.850277	10.6476	39
ABHD14B	1.05475	12.0308	110
ABHD15	0.477022	13.308	102
ABHD16A	1.35323	6.41321	30
ABHD17A	1.44847	4.58492	78
ABHD17B	1.09834	9.01617	76
ABHD18	0.97457	10.0831	38
ABHD3	0.927003	11.1872	77
ABHD4	0.768161	14.0169	110
ABHD5	0.909856	12.4564	101
ABHD6	0.809493	7.13011	110
ABI1	1.2359	4.13117	69
ABI2	1.06248	12.716	110
ABI3	1.09516	10.7182	110
ABL1	1.54825	-2.25044	110
ABL2	0.592194	10.8213	105
ABLIM1	0.952077	12.9361	110
ABLIM1.1	0.91479	13.0196	110
ABLIM3	1.49801	0.648029	85
ABLIM3.1	1.3609	8.12592	65
ABO	1.16723	9.50097	52
ABR	1.79953	0.873997	39
ABR.2	1.0084	10.5159	97
ABRACL	1.30723	7.20807	110
ABRAXAS1	1.20808	-0.0448354	110
ABRAXAS2	1.38604	4.69585	110
ABT1	0.933855	11.5108	96
ABTB2	0.922834	12.1772	75
ACAA1	1.04378	12.4708	110
ACAA2	1.02243	0.679033	110
ACACB	0.71542	10.8796	78
ACAD11	1.13449	3.45374	110
ACAD8	0.535324	12.623	110
ACAD9	0.660296	6.90937	110
ACADL	1.3369	4.21089	110
ACADM	0.799811	6.00767	110
ACADS	0.899534	13.6725	110
ACADSB	0.623494	9.61538	110
ACADVL	1.0679	10.1635	110
ACAN.1	0.888716	-2.27313	110
ACAP1	1.04331	9.29533	106
ACAP2	1.02923	12.6786	110
ACAP3	1.20293	8.67011	71
ACAT1	0.429352	0.339731	110
ACAT2	0.943142	12.9677	110
ACBD3	1.08855	6.2281	110
ACBD4	0.458897	10.3836	87
ACBD5.1	1.03334	11.6126	101
ACBD6	0.971656	12.4451	110
ACCS	0.618867	-3.47434	41
ACD	1.39898	-5.73105	34
ACE	0.568599	12.6155	110
ACE2	1.06316	3.90159	110
ACIN1	0.805846	14.317	105
ACLY	0.757211	12.6575	110
ACLY.1	1.1033	11.9742	110
ACMSD	0.933857	10.2463	110
ACO1	0.558155	3.06624	110
ACO2	0.608202	3.29849	110
ACOT1	0.877891	13.9727	101
ACOT11	0.434295	7.09252	110
ACOT13	0.697387	13.7177	110
ACOT2	1.01078	12.6522	110
ACOT4	0.877629	13.7361	110
ACOT7.1	0.636116	12.5384	101
ACOT8	1.08637	5.95447	110
ACOT9	1.13528	7.11875	110
ACOT9.1	1.21823	7.63247	50
ACOX1	1.01253	5.79997	110
ACOX1.1	0.536352	12.7374	91
ACOX2	0.730453	14.7306	110
ACOX3	0.644089	6.47551	110
ACP1	1.03276	12.0717	110
ACP1.1	1.03864	-0.982926	100
ACP2	1.10998	10.629	110
ACP5	1.00798	1.78556	110
ACP6	0.769594	13.2943	110
ACPP	0.842584	14.36	110
ACSF2	1.33182	7.36691	110
ACSF3	0.886323	9.23185	110
ACSL1	0.9775	7.1858	110
ACSL1.1	1.46614	-3.26512	73
ACSL3	0.819778	8.42387	110
ACSL4	0.890488	7.3584	110
ACSL5	1.16786	7.53358	110
ACSM2A	0.0904636	4.90007	110
ACSM2B	0.38181	7.77307	110
ACSM3	0.312223	8.08145	110
ACSM4	1.06086	7.20794	31
ACSM5	0.974519	5.65553	110
ACSS1	0.878768	3.88024	110
ACSS2	0.777254	2.46537	110
ACSS3	0.439837	7.03512	110
ACTA1	0.785259	-0.59504	87
ACTA2	1.01545	7.70048	110
ACTB	0.715653	11.7626	110
ACTBL2	0.994942	7.90346	110
ACTG1	0.634371	14.878	110
ACTL6A	0.833404	12.4948	110
ACTN1	1.49131	-3.60268	102
ACTN1.1	0.777182	6.16502	110
ACTN2	1.50456	6.49194	39
ACTN4	1.04551	11.5959	110
ACTN4.1	0.461632	6.10531	110
ACTR10	1.04719	11.547	110
ACTR1A	1.15374	11.31	110
ACTR1B	0.850385	13.7062	110
ACTR3	1.09522	11.1347	110
ACTR3B	1.21097	4.60032	87
ACTR5	0.742064	12.2746	110
ACTR6	0.783737	1.20643	110
ACTR8	1.09806	10.3634	110
ACTRT1	1.32894	1.00646	48
ACVR1	1.01606	10.1371	96
ACVR1B	0.863576	11.0542	42
ACY1	0.863786	13.4188	110
ACY1.1	1.03962	12.5757	110
ACY3	0.946759	4.13088	110
ACYP1	1.57082	-3.60965	110
ACYP2	1.06851	11.0004	110
ADA	0.698192	14.7281	110
ADA2	1.0916	4.12968	110
ADAL	1.07659	11.1848	110
ADAM10	0.987395	12.8987	110
ADAM17	1.15319	9.25015	110
ADAM22	1.19104	5.5461	42
ADAM9	0.793094	13.8802	110
ADAMDEC1	1.1821	8.09119	54
ADAMTS1	0.528557	13.9569	88
ADAMTS13	1.97431	0.0834575	30
ADAMTS15	3.51798	-7.01595	36
ADAMTS5	0.957786	3.01434	52
ADAMTS7	1.14962	8.98024	80
ADAMTSL1	1.0173	10.6195	92
ADAMTSL2	0.791123	12.6171	110
ADAMTSL3	0.507016	14.319	98
ADAMTSL4	0.732766	9.96959	110
ADAMTSL5	1.13432	8.99999	110
ADAP1	0.944069	10.953	110
ADAP2	1.04855	8.62294	96
ADAR	1.058	8.98296	110
ADAR.1	1.16903	10.1776	63
ADARB1	1.0641	10.3861	37
ADAT1	0.653983	9.05648	90
ADAT2	1.22319	8.26915	38
ADAT3	0.80447	13.7531	93
ADCK1	1.01098	1.3303	110
ADCK5	1.08163	6.45076	87
ADCY6	1.20113	3.98002	101
ADCY9	0.181213	2.42546	110
ADD1	0.71678	14.175	106
ADD1.1	1.11601	9.88398	101
ADD2	1.68754	-24.9642	106
ADD3	1.05234	12.0577	110
ADD3.1	1.0961	10.3814	110
ADGRA2	1.30058	9.01379	39
ADGRE2	1.04505	10.9712	67
ADGRE5	1.04308	0.764927	110
ADGRF1	0.80501	-2.61645	88
ADGRF5	1.01188	12.3063	110
ADGRG1	1.2162	2.16868	110
ADGRG6	1.6583	-1.62171	43
ADGRL2	0.986165	11.786	110
ADGRL4	1.10564	10.9235	110
ADGRV1	1.79666	-7.90994	40
ADH1A	0.713673	12.7586	110
ADH1B	0.977285	7.40087	110
ADH1C	0.770434	13.1757	110
ADH4	0.972423	11.97	64
ADH5	1.45293	-0.737143	110
ADH6	1.01837	12.2016	110
ADHFE1	0.748986	12.9961	110
ADI1	0.963622	9.44005	110
ADIPOQ	1.16371	9.49731	110
ADIPOR1	0.23729	9.48658	47
ADIRF	1.10316	10.1265	110
ADK	0.889322	13.2389	110
ADNP	1.32026	5.27051	110
ADNP2	1.17917	7.89775	52
ADO	1.26458	6.62345	110
ADPGK	1.20394	6.42658	110
ADPRH	0.91341	12.1155	110
ADPRHL2	1.4047	2.1657	110
ADRM1	1.52324	-6.48396	110
ADSL	1.0447	10.9263	110
ADSS	0.904685	9.45602	110
ADSSL1	1.44129	2.40151	110
AEBP1	0.842197	5.83742	110
AES	1.3099	5.51395	110
AFAP1	1.30372	8.85578	110
AFAP1L1	0.907505	13.3232	110
AFAP1L2	0.834513	8.59858	30
AFAP1L2.1	0.992942	10.23	35
AFDN	2.24657	-5.61201	49
AFDN.1	0.994182	11.243	110
AFF1	1.03549	11.1736	105
AFF4	0.78393	14.4935	110
AFG1L	0.695156	7.03501	110
AFG3L2	0.996938	10.9621	110
AFM	1.39836	-5.94487	110
AFMID	0.654688	14.6886	110
AFTPH	1.16415	8.00712	110
AGA	1.03766	4.90762	110
AGAP1	0.901006	13.1811	110
AGAP3	1.38753	2.01604	110
AGFG1	1.08247	11.5561	110
AGFG2	1.09853	12.1198	110
AGGF1	0.853273	12.7903	79
AGK	1.0135	10.0659	110
AGL	1.15268	9.95114	110
AGMAT	0.985034	14.1536	110
AGO1	1.12724	10.2129	110
AGO2	0.977125	12.8296	110
AGO3	1.40164	6.81104	110
AGPAT1	1.01286	13.1919	110
AGPAT2	0.931545	12.8137	101
AGPAT3	0.118888	5.39429	110
AGPAT4	1.8198	-2.33579	56
AGPAT5	0.932866	6.25549	110
AGPS	0.646669	12.8999	110
AGR2	0.682951	11.0281	92
AGR3	0.736968	3.71856	56
AGRN	1.45623	0.653577	110
AGT	1.26977	-5.36526	110
AGTPBP1	0.898442	12.5865	106
AGXT	0.994359	11.9161	92
AGXT2	0.766197	14.4754	110
AHCTF1	1.15736	9.87569	110
AHCY	1.44643	-17.2343	91
AHCYL1	1.22949	7.82748	110
AHCYL2	0.497459	12.4479	105
AHCYL2.1	0.43001	10.4621	97
AHDC1	1.08614	10.014	110
AHNAK	0.804683	14.3407	110
AHNAK2	1.24054	8.00559	110
AHR	0.902356	13.4246	110
AHSA1	0.866543	13.1987	110
AHSG	1.26756	6.13485	56
AHSG.1	1.20254	4.81567	110
AHSP	1.35408	0.435534	110
AIDA	0.481234	11.4773	110
AIF1	1.20365	9.23015	110
AIF1L	0.984748	12.1313	110
AIFM1	0.665598	10.0159	110
AIFM2	0.93526	9.82507	110
AIG1	1.35913	1.58249	105
AIMP1	1.15938	10.8558	110
AIMP2.1	1.30967	7.32811	110
AIP	1.44801	3.03042	110
AJAP1	1.0073	9.01868	52
AJUBA	0.795341	11.5463	80
AK1	1.18547	6.79284	110
AK2	1.13919	0.966504	110
AK3	0.867055	-8.57738	110
AK4	1.06681	11.4404	110
AK6	1.16424	7.36571	110
AK7	1.46964	6.62539	43
AKAP1	0.875808	6.5625	110
AKAP10	0.867774	13.9447	110
AKAP11	0.721063	6.3893	110
AKAP12	0.731656	14.3216	110
AKAP13	1.2446	9.0411	110
AKAP17A	0.855373	11.2855	110
AKAP5	0.652252	11.4952	50
AKAP7	1.07341	12.1374	110
AKAP8	1.03156	10.0357	110
AKAP8L	0.959376	11.6605	110
AKAP9	1.11662	-5.20385	67
AKNA	0.516522	-12.2963	92
AKR1A1	0.904843	12.5244	110
AKR1B1	1.07848	-1.59197	110
AKR1B10	0.803912	-21.2162	110
AKR1B15	1.08016	3.62481	73
AKR1C1	1.04969	0.130349	110
AKR1C2	0.955211	8.31446	110
AKR1C3	0.903801	13.8597	110
AKR1C4	1.06026	11.4146	106
AKR7A2	1.4877	-1.50208	110
AKR7A3	0.930534	10.9351	110
AKR7L	0.947418	-0.980049	105
AKT1	1.34118	5.56976	110
AKT2	1.35961	7.20242	110
AKT3	1.22202	8.4244	110
AKTIP	1.25897	7.73046	110
ALAD	1.16608	10.4592	88
ALAS1	0.894454	8.51171	101
ALB	1.22873	1.51859	110
ALCAM	0.614003	11.7343	110
ALDH16A1	1.0501	13.0392	110
ALDH18A1	1.10203	7.93837	106
ALDH18A1.1	1.09866	7.53898	110
ALDH1A1	0.791875	14.624	110
ALDH1A2	0.647612	8.82129	110
ALDH1A3	1.1264	10.3322	110
ALDH1B1	0.870585	9.28034	110
ALDH1L1	1.13586	9.51916	110
ALDH1L2	0.963808	7.79275	110
ALDH2	0.652398	11.8535	110
ALDH3A1	1.59805	-0.121767	33
ALDH3A2	0.838787	-14.0051	110
ALDH3B1	1.02599	6.06315	110
ALDH5A1	0.620566	10.8632	110
ALDH6A1	0.969925	10.4667	110
ALDH8A1	0.855106	10.7646	110
ALDH9A1	1.08783	9.76321	110
ALDOB	1.03748	13.2493	110
ALDOC	1.25625	9.24568	110
ALG1	0.969632	10.5288	110
ALG10B	0.818972	10.9811	44
ALG11	0.792604	14.0827	110
ALG12	0.877669	12.4369	110
ALG13	0.541092	13.8082	110
ALG14	0.6836	0.342255	106
ALG2	0.671682	7.62955	110
ALG3	1.08098	9.90408	88
ALG5	0.792093	13.4735	110
ALG6	0.880907	13.8087	110
ALG8	1.07477	10.9908	64
ALG9	0.879289	13.7137	105
ALKBH1	1.15446	3.02783	64
ALKBH2	0.629911	11.0124	51
ALKBH3	0.913941	8.37799	105
ALKBH4	1.41533	1.3131	110
ALKBH5	1.0509	11.732	110
ALKBH6	1.04253	8.50364	54
ALKBH7	0.923654	12.9929	110
ALKBH8	0.748005	14.6479	106
ALMS1	1.04397	9.59597	32
ALOX5	1.01749	7.33641	110
ALOX5AP	1.47493	1.20952	105
ALPI	1.26355	2.53383	40
ALPK1	0.70914	11.9564	66
ALPK2	1.0883	11.5983	106
ALPL	1.21421	0.0383872	110
ALS2	0.957243	13.3359	110
ALS2CL	1.26106	7.38889	46
ALYREF	1.27443	4.53916	110
AMACR	0.753402	-2.90416	110
AMBP	1.25167	2.77111	110
AMBRA1	1.39048	4.12799	55
AMDHD1	1.13075	10.2614	110
AMDHD2	1.34764	8.17895	35
AMDHD2.1	1.20633	8.71825	110
AMFR	1.2171	7.33804	101
AMN	0.552688	14.713	110
AMN1	0.344806	9.6982	47
AMOT	1.39363	5.61671	102
AMOTL1	1.17543	8.92058	110
AMOTL2	0.895281	9.6701	110
AMPD2	1.14074	10.9398	110
AMPD3	1.12239	7.84448	110
AMPH	0.995124	10.0645	63
AMT	1.03988	13.5775	110
AMZ2	1.09583	10.4979	89
ANAPC1	1.37216	3.90219	110
ANAPC10	0.476566	14.4919	110
ANAPC11	0.641695	-5.46471	71
ANAPC13	0.833214	11.2246	110
ANAPC16	0.709512	14.9002	110
ANAPC2	0.630033	13.6263	110
ANAPC4	1.13997	10.9835	110
ANAPC5	1.19902	10.2694	110
ANAPC7	1.3066	4.93761	110
ANG	0.695516	10.9545	110
ANGEL2	0.904772	8.78474	106
ANGPT2	1.20144	9.20728	110
ANGPTL2	1.42093	-2.50784	110
ANGPTL3	0.979548	12.7743	110
ANGPTL4	0.630804	14.5722	110
ANGPTL6	1.14233	10.4615	52
ANGPTL8	1.94702	-2.70455	32
ANK1	1.95169	-2.33243	36
ANK2	0.473987	8.2764	110
ANK2.1	0.597247	5.23749	110
ANK3	0.956988	12.9498	93
ANK3.1	0.813613	9.80248	75
ANKFY1	0.996815	10.7403	105
ANKHD1	0.473794	7.63317	71
ANKHD1-EIF4EBP3	1.05308	10.5745	110
ANKIB1	1.08714	9.86737	110
ANKLE2	0.843354	12.2158	110
ANKMY2	0.908495	11.1357	110
ANKRD10	0.906664	13.4599	110
ANKRD11	0.893419	13.4511	106
ANKRD13A	1.10296	0.370826	110
ANKRD13D	0.50798	7.39801	40
ANKRD16	0.690262	14.4058	106
ANKRD17	1.05842	11.0346	110
ANKRD2	0.341697	4.81646	110
ANKRD22	1.30683	-12.6016	96
ANKRD26	1.63562	1.5101	40
ANKRD27	0.516183	13.6161	110
ANKRD28	1.30136	5.40403	77
ANKRD36	1.66035	2.66429	39
ANKRD39	1.0396	11.8018	98
ANKRD40	1.17527	9.67974	67
ANKRD44	1.3447	6.30361	110
ANKRD46	0.944257	8.83435	78
ANKRD49	1.22636	6.41053	101
ANKRD50	0.717432	9.51849	83
ANKRD52	0.98198	12.1511	92
ANKRD54	0.743994	13.3831	110
ANKRD6	0.495045	12.3788	67
ANKS1A	0.691626	13.043	110
ANKS3	1.01443	12.3048	110
ANKS4B	1.16383	9.33523	110
ANKS6	0.990371	12.0035	110
ANKZF1	0.920022	12.6376	110
ANO1	1.03826	10.441	47
ANO10	0.852162	0.813498	110
ANO5	1.4999	3.65194	39
ANP32A	1.18974	8.40612	110
ANP32B	0.896024	12.9292	110
ANP32E	1.51954	1.12828	32
ANP32E.1	1.57277	4.5452	48
ANPEP	0.733905	14.1324	110
ANTXR1	1.09653	9.50558	101
ANTXR2	0.749025	14.2373	101
ANXA1	1.18653	5.44304	110
ANXA11	0.9315	13.4049	110
ANXA13	1.06991	8.63544	110
ANXA2	0.854828	12.8344	110
ANXA3	1.30069	2.00951	110
ANXA4	1.23537	7.1636	110
ANXA5	0.875997	13.3665	110
ANXA6	1.04367	11.8898	110
ANXA6.1	0.933183	7.44463	110
ANXA7	0.739526	14.4555	110
ANXA8	1.46888	0.545592	30
ANXA8L1	2.55677	-4.97635	34
ANXA9	0.806176	7.15806	110
AOAH	1.29825	6.63788	102
AOC1	1.28698	1.64585	110
AOC3	0.646426	8.56633	110
AOX1	0.619621	4.24711	110
AP1AR	1.1013	9.13768	110
AP1B1	1.35906	-1.28651	110
AP1B1.1	1.03832	9.50255	110
AP1G1	1.25612	6.33025	110
AP1G2	1.34495	4.80945	110
AP1M2.1	0.841767	10.766	64
AP1S1	0.954783	12.9431	110
AP1S2	1.13369	10.6918	110
AP1S3	1.52409	-5.78113	110
AP2A1	1.06973	11.3085	110
AP2A2	0.49458	13.784	93
AP2A2.1	1.08351	12.4228	110
AP2B1	0.891049	13.6368	110
AP2M1	0.836378	14.5495	110
AP2S1	0.929176	14.427	110
AP3B1	1.46379	0.485092	110
AP3B2	1.30288	7.94185	39
AP3D1	1.48874	-2.32486	110
AP3M1	1.26915	3.38247	110
AP3M2	0.968709	13.1956	110
AP3S1	1.3703	3.52146	110
AP3S2	1.90455	-13.0106	43
AP4B1	1.13468	2.95555	101
AP4E1	1.08396	10.9551	110
AP4M1	1.20333	7.56344	110
AP4S1	0.799621	11.6062	92
AP5B1	1.09398	4.31043	110
AP5M1	0.947597	10.9379	110
AP5S1	0.194967	6.20168	110
AP5Z1	1.11367	6.92638	110
APAF1	0.861938	12.9534	110
APBA1	1.06365	10.6528	106
APBA3	1.69502	-7.03858	101
APBB1	1.16509	9.51412	110
APBB1IP	1.10576	9.85847	110
APBB2	1.15989	9.88531	110
APCS	1.04885	-1.30959	110
APEH	1.15849	4.38373	110
APEX1	0.997104	11.5844	110
APEX2	0.692172	11.8211	55
APH1A	2.27157	-1.10457	40
API5	0.572583	-3.37445	105
APIP	1.29963	4.95829	110
APLF	0.287979	2.23032	105
APLP2	0.964652	-0.355345	110
APMAP	0.596235	14.1597	110
APOA1	1.42105	-19.5916	110
APOA2	1.40033	-0.0393122	110
APOA4	1.31152	-3.16855	110
APOA5	0.741304	11.2574	110
APOB	1.06714	8.96132	110
APOBEC3C	1.16317	8.18848	110
APOBEC3F	0.890473	13.6768	105
APOBEC3G	0.905721	12.9751	110
APOBR	1.09566	10.7495	110
APOC1	1.10466	9.01686	110
APOC2	0.870378	5.72023	110
APOC3	0.950156	5.62257	110
APOC4	0.874825	10.5869	81
APOD	0.833051	1.53245	110
APOE	1.45846	-12.3931	110
APOF	1.24559	-1.14744	110
APOH	1.29001	-0.122995	110
APOL1	1.07871	6.88232	110
APOL2	1.20218	6.53007	110
APOL3	1.22785	7.37298	110
APOL6	1.17239	8.86055	31
APOM	1.40064	-4.64597	110
APOO	0.808017	2.74352	110
APOOL	0.750695	9.14014	110
APP	0.374232	5.11833	110
APPBP2	1.41687	7.2338	45
APPL1	0.741878	8.08954	110
APPL2	0.764714	13.1157	110
APRT	1.16723	8.06662	110
APTX	1.11801	9.51888	110
AQP1	0.980152	9.88904	110
AQP2	1.04165	10.0764	71
AQR	0.960585	8.16518	110
AR	1.10958	7.98401	33
ARAF	1.11174	10.4474	110
ARAP1	0.820779	14.321	110
ARAP2	0.955838	6.73234	41
ARAP3	1.18912	7.39973	110
ARCN1	1.82842	-16.1024	110
ARF1	1.12365	5.99729	105
ARF3	1.177	9.18549	86
ARF4	1.24114	7.71965	110
ARF5	1.75406	-6.07472	110
ARF6	0.911052	11.6709	110
ARFGAP2	1.24792	9.04568	110
ARFGAP3	1.20266	8.16886	110
ARFGEF1	1.21476	6.47608	110
ARFGEF2	1.10127	7.34489	110
ARFGEF3	1.15186	9.32309	110
ARFIP1	1.57334	-6.77682	94
ARFIP1.1	1.19282	1.62055	101
ARFIP2	0.895379	13.8929	110
ARFRP1	1.09641	0.733484	110
ARG1	1.42623	-4.78778	102
ARG2	1.20106	-10.0649	110
ARGLU1	1.02813	9.89606	110
ARHGAP1	0.837186	-0.479806	110
ARHGAP10	0.583083	14.5891	110
ARHGAP12	1.05319	5.95193	96
ARHGAP15	1.05819	12.2294	110
ARHGAP17	0.755598	13.884	101
ARHGAP18	1.00525	12.4996	110
ARHGAP21	0.897417	13.8772	110
ARHGAP22	1.24695	9.78779	72
ARHGAP23	1.25104	6.85512	83
ARHGAP24	1.24896	7.36439	97
ARHGAP26	1.19421	5.69036	110
ARHGAP27	0.653059	14.5827	110
ARHGAP28	1.02437	11.3253	70
ARHGAP29	1.24644	6.88744	110
ARHGAP30	0.817617	10.4685	110
ARHGAP31	1.30575	4.66189	110
ARHGAP32	1.13629	7.16386	110
ARHGAP35	1.10269	8.83448	110
ARHGAP4	1.13048	9.33246	110
ARHGAP42	1.35243	3.36875	110
ARHGAP44	1.04742	10.1675	73
ARHGAP45	1.18766	9.37991	110
ARHGAP5	0.887257	13.12	110
ARHGAP6	0.912081	9.24816	110
ARHGAP8	0.631076	11.9467	110
ARHGAP9	1.17277	9.45594	110
ARHGDIA	1.17572	1.46525	110
ARHGDIB	0.961012	11.2489	110
ARHGEF1	0.398879	10.6122	110
ARHGEF10	1.39414	5.1928	110
ARHGEF10L	1.28947	6.5262	110
ARHGEF12.1	0.703723	12.1734	87
ARHGEF15	1.20916	8.77407	102
ARHGEF16	0.875063	13.1309	110
ARHGEF17	1.26859	6.49991	110
ARHGEF18	0.704417	12.2958	110
ARHGEF2	0.718733	12.7956	110
ARHGEF28	0.914493	13.178	110
ARHGEF35	1.13038	8.70174	75
ARHGEF37	0.945802	11.5206	110
ARHGEF40	1.05011	11.782	110
ARHGEF5	0.867361	14.1687	110
ARHGEF6	1.13515	10.3392	110
ARHGEF7	1.36729	3.5625	110
ARID1A	0.802179	12.5911	110
ARID1B	1.03619	12.6174	110
ARID2	0.806248	13.1413	110
ARID3A	1.31714	6.66513	60
ARID4A	1.25092	5.87726	110
ARID4B	0.700691	12.7801	110
ARID5B	0.485582	12.8897	66
ARIH1	1.58189	-4.61889	110
ARIH2	1.06446	12.2094	66
ARL 1.00	1.23587	3.6778	110
ARL14EP	1.1073	11.4186	110
ARL 15.00	1.17204	7.72878	110
ARL 2.00	0.755148	11.9982	110
ARL2BP	0.908318	14.0212	110
ARL 3.00	1.06338	11.7929	110
ARL4C	0.381204	9.63344	35
ARL5A	1.03781	11.448	66
ARL5B	0.707556	11.5169	50
ARL 6.00	0.573671	13.6524	105
ARL6IP1	0.859395	13.3207	110
ARL6IP4	1.1734	9.25032	101
ARL6IP4.1	0.60538	12.3421	56
ARL6IP5	0.761819	11.458	110
ARL6IP6	1.29066	6.06491	98
ARL8A	0.717117	11.7849	110
ARL8B	0.98358	6.23687	110
ARMC1	0.548278	8.19783	110
ARMC10.1	1.22669	8.93218	100
ARMC5	1.07062	11.8364	110
ARMC6	1.13097	10.6317	110
ARMC8	1.27026	7.20606	110
ARMC9	1.30102	7.29062	76
ARMCX1	0.301593	9.79569	110
ARMCX2	0.353723	2.12007	110
ARMCX3	0.998409	8.31692	110
ARMCX5	0.981488	1.18882	52
ARMCX6	0.90671	12.7214	69
ARMH3	1.12814	10.3902	110
ARMT1	1.20197	10.1763	110
ARNT2	0.465486	4.29392	33
ARNTL	1.27139	7.59795	53
ARPC1A	1.06118	11.4043	110
ARPC1B	1.26787	6.88048	110
ARPC2	1.09986	10.9012	110
ARPC3	0.901156	14.0475	110
ARPC4	1.00024	11.8906	110
ARPC5	1.12	12.1149	110
ARPC5L	1.08979	10.8051	110
ARPIN	1.01003	11.1132	101
ARPP19	0.971553	13.0495	110
ARRB1	0.802936	13.8662	110
ARRB2	0.646751	14.1665	110
ARRDC1	0.670356	14.2012	110
ARSA	0.841057	9.94695	110
ARSB	0.900841	10.345	110
ARSD	0.416781	2.78224	110
ARSE	0.74354	13.4259	110
ARSF	1.10614	11.438	110
ARSK	1.3099	8.65925	65
ART3	1.36555	3.19025	75
ARV1	0.816028	9.65869	65
ARVCF	0.900931	13.7424	110
AS3MT	0.551017	14.8605	110
ASAH1	1.51966	-4.98449	110
ASAP1	0.919052	13.253	110
ASAP2.1	0.87666	14.1095	110
ASAP3	1.09971	10.7155	101
ASB13	0.78144	14.473	110
ASB6	1.06988	10.6391	64
ASB9	0.34473	14.413	110
ASCC1	0.793678	14.0146	110
ASCC2	1.14376	6.49473	110
ASCC3	1.12539	10.1577	110
ASDURF	0.949494	13.1751	110
ASF1A	0.940128	11.308	110
ASGR2	0.782351	4.60389	66
ASH2L	0.996205	12.0392	110
ASL	1.06694	8.78994	110
ASMTL	0.856658	13.4878	110
ASNA1	1.32235	6.09213	110
ASNS	1.25782	0.222785	110
ASPA	1.18735	10.4166	110
ASPDH	0.540714	12.295	110
ASPG	1.35711	-0.661508	110
ASPH	1.00248	6.55373	110
ASPN	1.17399	1.67689	110
ASPSCR1	0.795389	14.2213	110
ASRGL1	1.10896	10.722	110
ASS1	1.12166	10.9122	110
ASTN2	0.849862	10.579	110
ASXL2	1.38342	4.43759	41
ATAD1	0.877344	6.79438	110
ATAD2	0.463693	10.9591	50
ATAD3A	0.872041	11.2787	110
ATE1	0.901174	12.5236	106
ATE1.1	1.04821	12.5716	110
ATF1	1.35251	4.29889	110
ATF2	1.27003	7.02986	110
ATF6	1.16303	10.1728	53
ATF7	1.05673	11.6556	110
ATF7IP	0.956783	11.3047	110
ATG101	0.782261	10.9743	110
ATG12	0.882764	3.75548	110
ATG14	1.20112	8.9971	110
ATG16L1	1.97978	4.2925	31
ATG2A	1.09644	4.62595	110
ATG2B	1.25322	8.59989	110
ATG3	1.18079	10.4643	110
ATG4A	2.15035	-11.3106	96
ATG4B	1.12568	10.0876	110
ATG4C	1.25511	7.81522	106
ATG5	0.809489	11.9839	110
ATG7	1.18743	9.23321	110
ATG9A	1.41193	1.9355	110
ATIC	0.744969	12.3902	110
ATL1	0.740761	10.7561	110
ATL2	0.66313	14.0755	106
ATL3	0.639425	13.2503	110
ATM	0.752475	13.2495	110
ATN1	1.1411	9.27933	101
ATOX1	1.13475	8.49506	110
ATP11A	0.9462	13.8638	110
ATP11B	1.19427	8.79235	110
ATP11C	0.611487	10.0339	57
ATP13A1	0.925582	11.6081	110
ATP13A2	1.38748	4.91207	36
ATP13A3	1.32808	2.72094	110
ATP1A1	0.86833	13.6862	110
ATP1B1	1.34878	0.727154	110
ATP1B3	0.601128	14.2492	110
ATP23	0.624844	10.8566	110
ATP2A2	1.02436	7.88137	110
ATP2A3	1.00977	12.7904	110
ATP2B1	1.09628	8.89324	110
ATP2B2	0.701707	10.9335	42
ATP2B4	1.06647	10.951	110
ATP2C1	1.01564	11.8577	110
ATP5F1A	0.70184	7.96794	110
ATP5F1B	0.519816	4.95947	110
ATP5F1C	0.871557	9.0288	110
ATP5F1D	0.962749	6.21213	110
ATP5F1E	0.716124	13.1896	110
ATP5IF1	1.00344	11.5303	110
ATP5MC2	0.504131	12.0488	106
ATP5MD	0.652208	4.33105	110
ATP5ME	0.936472	4.18612	110
ATP5MF	1.23739	9.40363	82
ATP5MF-PTCD1	0.863685	10.3214	110
ATP5MG	0.55269	3.04559	110
ATP5MPL	0.611289	12.7221	110
ATP5PB	0.516346	7.37453	110
ATP5PD	0.620092	3.46439	110
ATP5PF	0.764371	-1.57163	110
ATP5PO	0.754327	1.1297	110
ATP5S	0.672556	9.63587	110
ATP6AP1	0.593936	8.68004	110
ATP6AP2	0.777633	4.92603	110
ATP6V0A1	1.15126	11.3242	84
ATP6V0A1.1	0.662192	14.0239	110
ATP6V0A2	0.669711	14.1985	110
ATP6V0A4	1.17185	6.12615	110
ATP6V0C	0.973747	11.2734	110
ATP6V0D1	0.797202	6.35561	110
ATP6V0D2	0.800143	11.4265	101
ATP6V1A	0.699352	-1.98351	110
ATP6V1B1	0.934244	11.4958	110
ATP6V1B2	0.48728	11.5886	110
ATP6V1C1	0.700424	11.5208	110
ATP6V1C2	0.329976	2.67393	32
ATP6V1D	0.54491	3.64737	110
ATP6V1E1	0.920499	-4.18961	110
ATP6V1F	0.836216	-3.32892	110
ATP6V1G1	0.0594955	2.72193	110
ATP6V1G2	0.799514	13.9453	110
ATP6V1G3	0.389381	11.4176	92
ATP6V1H	0.348253	-4.34984	110
ATP7A	1.1217	9.85666	110
ATP7B	0.300533	5.15322	30
ATP8B1	0.79015	8.32425	54
ATP9A	0.766813	14.1723	110
ATP9B	1.01492	11.2474	110
ATPAF1	0.665282	4.97718	110
ATPAF2	0.82424	9.83878	110
ATR	0.1575	8.72887	92
ATRAID	0.861168	2.48753	110
ATRIP	1.38332	9.17727	33
ATRN	1.25684	-19.1121	110
ATRX	0.817295	11.6107	93
ATXN1	0.471974	-10.3548	106
ATXN10	1.05882	11.5713	110
ATXN1L	1.28539	6.33111	110
ATXN2	1.25079	8.16274	110
ATXN2L	1.49412	-0.788161	110
ATXN3	1.39842	1.88867	110
ATXN7	1.06893	10.7698	74
ATXN7L3	0.941878	8.78368	35
ATXN7L3B	0.743292	14.4321	110
AUH	0.614531	4.95135	110
AUP1	1.1198	9.92388	110
AURKAIP1	1.25746	4.94723	96
AUTS2	1.10841	9.21826	79
AVEN	1.18978	9.24355	110
AVL9	0.996146	4.70833	110
AXL	0.525777	5.07681	44
AZGP1	1.66261	-14.3098	110
AZI2	1.0896	9.65453	110
AZU1	1.25998	-14.6995	110
B2M	0.757643	9.45148	110
B3GALT6	2.01841	-1.69421	40
B3GAT3	0.885765	6.12204	110
B3GLCT	0.888189	8.36171	110
B3GNT9	1.92391	-1.46438	32
B3GNTL1	1.04171	9.5494	61
B4GALT1	1.02892	5.01928	110
B4GALT3	1.06491	10.3075	49
B4GALT4	0.62929	7.0508	110
B4GALT7	1.0445	10.4689	101
B4GAT1	0.983473	7.17076	110
B9D1	0.752678	14.8308	110
B9D2	1.67766	-5.68662	83
BABAM1	1.50144	1.05602	110
BABAM2	1.35233	4.06426	110
BACH1	0.95168	9.9018	110
BAD	1.24425	8.43378	110
BAG1	0.577848	14.4598	110
BAG2	1.23182	8.19345	110
BAG3	1.10655	10.9774	110
BAG4	1.13729	9.81319	106
BAG5	1.28978	8.40714	110
BAG6	1.10392	9.19269	110
BAIAP2	0.969707	11.0741	110
BAIAP2L1	1.15872	3.06676	110
BAIAP2L2	1.55148	4.88339	110
BAK1	1.31295	-8.0769	110
BANF1	0.624561	12.8967	110
BANP	0.482912	13.2131	73
BAP1	1.0182	12.1803	85
BARD1	1.11661	4.40214	110
BASP1	1.13095	10.6523	110
BAX	1.05042	12.2515	110
BAZ1A	1.17379	7.64139	110
BAZ1B	1.15536	10.7529	110
BBC3	1.14261	3.69875	35
BBIP1	0.962332	12.3228	102
BBOX1	0.719668	9.29011	110
BBS1	1.17218	9.19853	110
BBS10	0.92075	10.7002	44
BBS2	0.960025	12.8732	110
BBS4	1.15796	5.49702	101
BBS5	1.31209	5.40941	101
BBS7	1.17055	6.54185	110
BBS9	1.29332	7.9251	89
BBX	1.1149	8.44545	110
BCAM	1.18843	8.8704	110
BCAP29	0.859132	12.4795	63
BCAP31	0.738143	14.1257	110
BCAR3	1.01438	12.4695	110
BCAS2	1.01998	12.2532	110
BCAS3	1.06738	9.61981	70
BCAS3.1	0.878405	11.2255	74
BCAT1	1.34779	-0.541669	110
BCAT2	0.969751	-3.90068	110
BCCIP	1.2016	3.33642	36
BCCIP.1	0.943669	13.442	110
BCHE	1.15839	-2.46661	110
BCKDHA	0.698649	6.6478	110
BCKDHB	0.793574	12.2182	110
BCKDK	0.956551	7.71368	110
BCL10	1.12879	10.6931	110
BCL11B	1.43156	7.17865	78
BCL2	0.780576	14.1542	100
BCL2L1	0.953227	11.728	110
BCL2L11	1.00145	2.74293	70
BCL2L13	0.988089	7.78116	110
BCL3	1.38576	6.13095	71
BCL7A	0.7911	14.2984	110
BCL7B	0.955436	12.5393	110
BCL7C	1.09982	9.16247	56
BCL9L	1.06863	11.5838	110
BCLAF1	0.48529	8.4278	101
BCLAF1.1	1.13255	11.6824	101
BCLAF3	0.349535	10.0857	51
BCO1	0.985792	7.20214	62
BCR	0.62784	6.53232	110
BCS1L	0.781145	6.59349	110
BDH1	0.514838	10.2739	110
BDH2	0.939281	13.6073	110
BECN1	1.2792	7.46768	110
BEND3	1.34802	8.22246	75
BEND7	0.868017	11.7613	73
BET1	0.942515	5.44362	110
BET1L	0.876499	9.87297	110
BGN	1.02047	-1.8941	110
BHMT	1.02658	12.4691	110
BHMT2	0.715385	10.838	110
BICC1	1.26175	9.07356	110
BICD1	1.21275	9.12664	110
BICD2	1.03854	12.8275	110
BICDL1	0.716861	7.73212	53
BICRA	1.04765	1.93593	54
BID	1.08713	11.2841	110
BIN1.1	1.05695	1.45029	110
BIN2	1.13805	8.83623	110
BIN3	1.00631	10.5502	110
BIRC2	1.01493	12.5506	110
BIRC3	1.15962	5.92959	61
BIRC6	1.15628	8.93251	110
BLMH	1.07663	11.4278	110
BLNK	0.885036	11.3642	110
BLOC1S1	1.597	-2.73338	110
BLOC1S2	1.01893	11.618	110
BLOC1S3	1.16073	9.94909	110
BLOC1S4	1.41352	2.66743	110
BLOC1S5	1.36628	6.04348	110
BLOC1S6	1.12138	11.0672	110
BLVRA	1.3425	4.98385	110
BLVRB	1.45729	-2.98775	110
BLZF1	1.15793	10.6815	92
BMF	1.05191	9.7422	60
BMP1	0.763236	9.55714	53
BMP2K	1.37497	2.21165	110
BMPR2	0.472821	12.6176	92
BMS1	1.20377	8.68592	110
BMX	1.22781	9.27845	35
BNC2	1.28652	7.50017	43
BNIP1	1.44733	2.90959	110
BNIP2	1.01278	11.6485	74
BNIP2.1	0.680457	12.3383	70
BNIP3	1.41451	2.81112	110
BNIP3L	0.973315	11.3177	77
BOD1	1.16643	8.06095	110
BOD1L1	1.06132	11.3777	110
BOK	0.78685	13.5121	106
BOLA1	1.15189	10.0492	110
BOLA2	1.17765	4.1846	110
BOLA3	1.12414	5.85646	110
BOP 1.00	1.02215	13.0431	110
BORCS5	1.20107	9.41723	110
BORCS6	1.13188	11.368	110
BORCS7	1.27619	8.12284	110
BORCS8	0.395438	11.6121	72
BPGM	1.63553	-19.8012	110
BPHL	0.607843	10.6073	110
BPI	0.861431	7.88893	106
BPIFB6	1.95483	-1.72575	41
BPNT1	1.12828	7.00089	110
BPTF	1.47131	3.08022	40
BRAF	1.274	9.07343	110
BRAP	1.31382	5.67753	110
BRAT1	0.864781	12.6075	110
BRCC3	1.00949	7.82034	110
BRD1	1.11407	10.6575	96
BRD2	1.0707	13.348	110
BRD3	1.22071	7.55567	110
BRD4	0.973281	12.4213	110
BRD7	0.860483	6.68815	110
BRD8	0.949233	9.76114	110
BRD9	0.17848	-1.4146	96
BRF1	0.898847	14.126	110
BRF2	1.32765	7.25603	56
BRI3	1.00675	5.0848	84
BRI3BP	0.56107	14.3349	96
BRIX1	1.1739	9.24836	110
BRK1	1.00205	12.6418	110
BRMS1	0.844928	7.37926	71
BRMS1L	0.770929	13.5297	110
BROX	1.11763	10.5671	110
BRPF1	1.07407	11.9718	101
BRPF3	1.3349	-3.82122	52
BRWD1	0.913131	9.5276	33
BSCL2	0.656122	9.43209	110
BSDC1	0.868208	9.46901	110
BSND	0.663409	11.7042	101
BSPRY	1.18163	6.53723	110
BST1	0.705493	12.8547	110
BST2	0.925423	13.5212	110
BTAF1	0.616343	14.2397	110
BTBD1	1.17069	9.3105	101
BTBD10	0.734182	13.0624	76
BTBD2	0.997333	10.7737	106
BTBD9	1.57974	6.04278	47
BTD	1.23979	2.65016	110
BTF3	0.95255	12.8821	110
BTF3L4	1.13927	11.0044	110
BTN2A1	1.19952	8.29441	110
BTN3A1	0.919787	10.0433	97
BTN3A2	1.41684	1.96213	105
BTN3A3	0.952039	10.9081	110
BTNL9	1.51977	1.41594	80
BUB3	1.29069	5.96125	110
BUD13	1.34806	4.80389	110
BUD23	1.03836	11.9274	110
BUD31	1.25058	8.57285	110
BYSL	1.25072	6.96551	110
BZW1	0.942896	13.3059	110
BZW2	1.00297	12.1674	110
C11orf52	0.931582	12.6525	110
C11orf54	0.842514	14.1053	110
C11orf58	1.00077	9.66067	110
C11orf95	1.24449	7.22368	42
C11orf96	1.14065	9.93264	110
C11orf98	1.00709	13.2756	110
C12orf10	0.795639	13.878	110
C12orf29	1.07399	11.7409	110
C12orf4	1.00392	10.2166	110
C12orf43	1.18494	9.23162	110
C12orf45	0.850177	12.6746	110
C12orf57	0.637452	13.8214	110
C12orf65	0.998873	9.02339	79
C12orf66	1.04268	11.434	101
C12orf73	1.06625	10.204	101
C12orf75	0.446303	14.3898	110
C14orf119	0.780409	12.3966	67
C15orf40	0.729297	10.0252	110
C15orf48	0.78716	10.6309	110
C16orf58	1.19915	7.45392	110
C16orf70	1.26456	8.06465	110
C16orf86	0.809882	12.9007	76
C16orf91	0.895958	13.1577	102
C17orf49	0.829854	13.0995	110
C17orf75	1.14908	10.317	110
C17orf80	1.1394	11.8334	110
C17orf97	0.890566	11.3132	106
C18orf21	1.25999	2.3653	78
C18orf25	0.94368	13.1464	105
C18orf32	0.253626	10.0461	104
C19orf12	0.729522	9.41	110
C19orf25	1.16455	6.10441	110
C19orf33	1.20669	9.06849	110
C19orf44	0.509452	10.4411	34
C19orf47	1.27655	7.39267	101
C19orf53	1.07878	11.446	110
C19orf54	1.10664	4.34311	78
C19orf66	0.869579	12.0164	110
C19orf70	0.890225	13.351	110
C1D	0.701075	13.8517	110
C1GALT1	0.880745	13.3988	110
C1GALT1C1	0.688809	10.7368	100
C1QA	0.878816	7.52798	110
C1QB	0.933113	10.7557	110
C1QBP	0.758048	13.9955	110
C1QC	0.944774	9.53761	110
C1QTNF3	0.803341	-4.23555	110
C1QTNF5	0.908576	12.2002	110
C1R	0.758153	11.4196	110
C1RL	1.05149	0.976819	110
C1S	1.01938	12.5079	110
C1orf109	0.598779	5.16027	83
C1orf116	0.871562	9.15602	110
C1orf122	1.09926	10.1393	110
C1orf123	0.809832	8.82279	110
C1orf131	0.631214	8.81309	43
C1orf174	1.12362	8.2505	110
C1orf198	0.819097	-1.5312	110
C1orf21	1.5356	4.27175	31
C1orf210	1.15783	8.96239	97
C1orf226	1.04975	10.0757	92
C1orf35	1.17301	10.9474	110
C1orf43	1.51437	3.33242	49
C1orf50	1.01755	11.1923	110
C1orf52	0.990635	12.3706	82
C2	0.997797	9.299	110
C20orf194	0.575297	13.7448	84
C20orf27	1.18797	8.70467	110
C21orf2	1.23496	7.72473	110
C22orf39	0.94084	12.3543	75
C2CD2	1.1217	6.48395	92
C2CD2L	0.974364	10.2436	110
C2CD4C	1.11003	8.9722	47
C2CD5	0.992853	9.70648	110
C2orf15	0.803212	10.8539	35
C2orf49	0.954133	13.0343	110
C2orf54	1.18508	4.06671	97
C2orf68	0.795783	8.43075	60
C2orf69	0.852779	13.9134	110
C2orf76	0.821863	14.3083	106
C2orf88	1.31323	2.37854	101
C3	1.0642	5.73999	110
C3orf33	0.93784	1.25596	43
C3orf38	1.20091	9.90602	110
C3orf58	0.815878	13.7199	100
C4A	0.973767	5.56606	110
C4B	1.17795	7.74681	110
C4BPA	0.890926	10.7139	110
C4BPB	0.885918	10.6905	110
C4orf19	1.17365	9.51014	37
C4orf3	0.671544	14.5506	110
C4orf33	0.981698	11.6012	110
C5	1.14562	4.61733	110
C5AR1	0.611427	10.4402	65
C5orf15	1.35992	3.04771	77
C5orf22	0.900769	13.145	110
C5orf24	0.875142	13.4067	110
C5orf51	0.97782	12.87	110
C6	0.991904	11.5095	110
C6orf10	1.55944	3.5587	53
C6orf106	1.13289	10.113	105
C6orf120	0.761954	4.23467	106
C6orf132	1.03606	10.9532	96
C6orf136	0.76763	6.33958	102
C6orf203	0.865813	11.6484	110
C6orf47	0.685266	13.605	110
C6orf89	1.14132	10.5033	97
C7	1.33618	0.836286	110
C7orf25	0.817757	14.0184	101
C7orf26	1.32976	7.61533	87
C7orf43	0.823588	13.5758	110
C7orf50	0.660075	14.7149	110
C8A	0.989218	10.1844	110
C8B	1.04663	10.6804	110
C8G	1.1846	7.2826	110
C8orf33	1.00125	11.2848	110
C8orf37	1.15226	8.84277	110
C8orf59	0.863661	2.37912	110
C8orf82	0.986045	13.0944	110
C9	0.990672	7.38598	110
C9orf16	1.26241	3.89511	74
C9orf170	1.58695	3.43002	43
C9orf40	1.37628	3.63357	92
C9orf64	1.33874	3.424	110
C9orf66	0.939228	4.01309	101
C9orf72	0.57655	10.7547	45
C9orf78	1.04729	7.75712	110
C9orf85	0.468343	10.8675	36
CA1	1.54493	-13.9157	110
CA1.1	1.71217	0.725117	39
CA12	0.68975	14.5933	110
CA13	1.19949	5.4586	110
CA2	1.07901	8.46615	110
CA3	1.52497	-5.16077	110
CA4	0.652688	13.9138	110
CA5B	1.14965	9.20635	110
CA8	0.786648	4.14474	92
CA9	0.876028	12.4996	110
CAAP1	0.793456	14.5714	110
CAB39	1.00773	10.48	110
CAB39L	0.5835	3.54215	110
CABIN1	0.728486	9.01966	106
CABLES1	0.726225	14.507	110
CACFD1	1.19545	4.62397	72
CACHD1	0.820457	-5.92353	52
CACNA2D1	1.21139	6.51421	110
CACNG6	0.706106	2.0444	97
CACTIN	0.565174	7.94694	110
CACUL1	0.908271	13.358	110
CACYBP	1.26493	1.81941	110
CAD	0.78115	14.4912	110
CADM1	1.18308	9.70582	110
CADM4	0.825215	14.2317	110
CADPS2	0.583241	0.0559462	110
CALB1	0.720517	13.228	110
CALB2	1.03712	6.81858	91
CALCOCO1	0.950744	-1.5818	110
CALCOCO2	0.841714	-10.7547	110
CALCRL	1.10898	8.32142	110
CALD1	1.12893	-0.818736	110
CALD1.1	1.03855	9.0179	110
CALD1.2	0.701292	13.5556	110
CALHM5	1.38673	1.63959	92
CALHM6	1.13854	7.27706	45
CALML3	1.59626	-4.66373	110
CALML4	1.04284	5.61266	110
CALR	1.01774	4.16243	110
CALU	0.904873	12.1719	110
CALU.1	1.21722	3.26102	110
CAMK1	0.950125	2.77067	110
CAMK1D	0.936191	13.5041	110
CAMK2B	1.03514	-3.1466	87
CAMK2D	1.22607	7.02527	106
CAMK2G.1	1.77887	2.48614	39
CAMK2N1	1.08494	9.72459	48
CAMK4	0.820171	12.1245	93
CAMKK1	0.927754	12.1991	55
CAMKMT	0.888789	13.0448	96
CAMLG	0.822424	12.6022	110
CAMP	1.06028	-4.75489	110
CAMSAP1	0.957696	8.17376	110
CAMSAP2	1.0781	11.3919	110
CAMSAP3.1	0.987692	10.4133	36
CAND1	1.22613	8.10623	110
CAND2	1.27904	-1.19969	110
CANT1	0.798768	11.4928	110
CANX	1.11966	10.6345	110
CAP1	0.986167	10.868	110
CAP2	1.1208	9.47753	110
CAPG	0.918591	13.2352	110
CAPN1	0.811572	13.1911	110
CAPN15	1.11005	9.1138	110
CAPN2	0.76973	14.1413	110
CAPN5	0.993759	9.65616	110
CAPN6	1.89202	-7.23568	64
CAPN7	0.839021	14.6127	110
CAPNS1	0.958737	11.4111	110
CAPRIN1	1.19716	10.3058	110
CAPS	1.15479	7.59119	110
CAPZA1	1.26707	9.45202	110
CAPZA2	1.02477	11.8631	110
CAPZB	1.02179	8.09072	36
CAPZB.1	0.910002	13.1312	110
CARD10	1.11925	-7.55258	110
CARD11	1.44612	0.272645	110
CARD16	1.1233	9.87833	106
CARD19	0.907756	11.614	110
CARD6	1.22895	7.21985	66
CARD8	1.43799	2.31384	110
CARD9	1.3075	7.31576	62
CARHSP1	1.06948	12.3643	110
CARM1	1.21843	5.36801	110
CARMIL1	1.67309	5.51931	34
CARMIL1.1	0.816252	9.49669	110
CARNMT1	1.11784	11.0165	110
CARS	0.617243	10.5889	110
CARS2	0.593137	12.3477	110
CASC3	0.940864	11.2165	110
CASC4	0.925118	8.37849	110
CASK	0.966927	12.6996	110
CASKIN2	1.58657	-1.80484	110
CASP1	1.00263	12.1606	110
CASP10	0.737551	14.8171	110
CASP14	1.00463	-0.0536641	30
CASP2	0.937664	12.3423	110
CASP3	1.10013	10.8357	110
CASP4	0.855198	13.7217	110
CASP6	1.06806	-3.17697	110
CASP7	1.04385	11.4522	110
CASP9	0.581273	14.6353	110
CASR	0.807283	11.8219	92
CAST	0.680742	13.8055	110
CAST.1	0.486623	7.33435	110
CASTOR1	0.876445	12.2397	62
CASTOR2	1.02548	10.0509	106
CAT	1.22926	-6.00532	110
CAV1	1.26208	4.41122	110
CAV2	1.28724	7.34406	110
CAVIN1	0.896012	13.6697	110
CAVIN2	1.17663	9.30985	110
CAVIN3	0.943362	11.9588	110
CBFB	0.990692	7.42588	41
CBFB.1	0.772111	12.8599	106
CBL	1.09696	10.6102	110
CBLB	0.535743	14.093	90
CBLL1	1.15283	9.54648	110
CBR1	1.06328	8.31849	110
CBR3	0.682472	14.3906	110
CBR4	0.843187	10.0924	110
CBWD1	0.632351	10.3278	30
CBX1	1.07377	10.8955	110
CBX3	0.924432	13.5805	110
CBX4	0.949065	13.0447	96
CBX5	0.841101	9.93873	110
CBX6	1.11924	7.87822	42
CBX7	0.644576	11.5654	63
CBX8	1.02946	12.5914	110
CC2D1A	1.37101	-0.716404	110
CC2D1B	1.00413	11.9493	110
CC2D2A	1.16358	8.46054	56
CCAR1	1.01237	11.4347	110
CCAR2	0.934248	13.1127	110
CCDC102A	1.40237	6.91734	110
CCDC106	1.23285	5.21036	74
CCDC115	1.09457	11.1269	110
CCDC117	1.00043	10.2452	110
CCDC12	1.16792	9.42095	110
CCDC120	0.957018	11.3501	61
CCDC124	0.906858	13.4286	110
CCDC127	1.05503	12.4458	110
CCDC130	0.642053	11.6402	92
CCDC134	1.20478	7.45516	110
CCDC149	1.05668	5.89178	46
CCDC150	1.46342	5.66846	39
CCDC174	0.757266	13.6894	96
CCDC182	1.09231	7.66879	67
CCDC186	1.31054	5.73171	110
CCDC22	0.979842	12.6359	110
CCDC25	1.4431	1.93488	110
CCDC28A	1.3247	5.20217	110
CCDC32	0.962534	10.7635	105
CCDC39	0.540834	9.15135	67
CCDC43	0.888582	13.3766	110
CCDC47	1.15514	9.32223	110
CCDC50	0.709162	13.3785	110
CCDC51	0.50933	3.31346	110
CCDC58	1.07209	10.7756	110
CCDC6	0.891182	12.1638	110
CCDC61	0.515118	9.7988	101
CCDC65	1.20387	8.80663	106
CCDC68	1.58323	4.11313	39
CCDC69	0.727703	10.9791	43
CCDC71L	0.479702	11.2306	44
CCDC77	1.04358	9.30464	34
CCDC8	1.33852	5.61785	110
CCDC80	1.09193	0.203882	105
CCDC82	0.907117	12.8933	97
CCDC85A	1.46887	6.63837	43
CCDC85B	0.92984	12.1237	66
CCDC85C	1.19084	9.09529	91
CCDC86	1.47682	2.30844	110
CCDC88A	0.803475	14.2174	110
CCDC88B	1.13074	4.46043	101
CCDC88C	1.02609	12.7603	110
CCDC9	0.937198	9.80938	110
CCDC90B	0.798975	11.9372	110
CCDC91	1.11247	5.25569	106
CCDC92	1.11899	7.11888	110
CCDC93	0.886145	13.8295	110
CCDC97	1.09655	9.12247	110
CCDC9B	1.07509	-7.267	110
CCL14	0.812741	12.0186	110
CCL16	0.902947	9.36143	57
CCL18	0.669934	12.9241	102
CCL21	1.25258	-1.82048	80
CCL5	0.90975	13.2872	87
CCM2	1.05006	10.8896	110
CCNC	0.768293	4.21767	69
CCND1	1.31164	8.02517	106
CCNDBP1	1.28501	6.8369	67
CCNH	1.00921	11.7597	110
CCNK	0.953624	13.3928	110
CCNL1	1.51024	4.51308	65
CCNL2	1.16258	8.7281	68
CCNT1	0.980832	13.0322	110
CCNT2	0.776909	11.2397	90
CCNY	1.08937	11.332	110
CCNYL1	1.38282	2.27891	92
CCP110	0.433455	13.3358	79
CCPG1	0.93653	-2.99499	88
CCS	1.17608	9.54634	110
CCSER1	1.07792	10.0723	67
CCSER2	0.704579	12.7987	75
CCT2	1.10529	11.583	110
CCT3	1.2038	5.38333	110
CCT4	1.08636	7.12193	110
CCT5	1.11061	10.8285	110
CCT6A	1.15015	9.37111	110
CCT6B	0.877296	14.3429	110
CCT7	1.14108	8.76495	110
CCT8	1.24892	4.57156	110
CCZ1	0.90609	12.2433	110
CD109	1.1847	9.76144	110
CD14	1.21353	6.31269	110
CD151	0.825907	14.2486	110
CD163	1.11316	9.2342	101
CD163L1	0.963919	4.80573	43
CD177	1.20862	4.06221	35
CD180	0.862088	11.7048	110
CD2	0.706299	4.37841	110
CD200	1.22329	7.85793	101
CD209	1.3165	6.72211	102
CD247	1.17822	4.59191	44
CD248	1.00217	12.6516	110
CD276	1.35339	5.03477	110
CD2AP	1.24456	6.71676	110
CD2BP2	1.09252	8.97086	110
CD300A	0.70045	10.4552	70
CD320	0.967477	11.3083	51
CD33	1.19747	9.04626	48
CD34	1.24387	5.07803	105
CD36	1.02704	10.7659	110
CD38	0.950845	-14.52	110
CD3D	0.779462	5.70068	43
CD3E	1.23982	2.89022	65
CD3G	1.2	8.72196	51
CD4	1.31792	3.40681	110
CD40	1.24426	8.35917	110
CD44	1.15343	7.38233	110
CD46	0.704251	8.59998	70
CD46.1	0.816282	13.9681	110
CD47	1.52413	-2.46845	110
CD48	1.12381	6.14	93
CD5	0.859655	0.906456	51
CD53	1.1847	10.2227	83
CD55	0.767707	7.39722	110
CD58	0.779482	13.5755	105
CD59	1.21451	0.889652	110
CD5L	1.17533	3.12316	110
CD63	1.11031	6.39435	110
CD68	1.49877	6.59888	43
CD70	1.88983	-9.52937	110
CD72	1.97151	0.0669824	41
CD74	1.26128	1.67407	110
CD81	1.25107	8.43862	110
CD82	1.06005	6.09596	101
CD83	1.82648	4.74053	34
CD84	1.1741	0.523923	82
CD8A	0.988442	6.90765	66
CD9	0.80541	-8.21828	110
CD93	1.2662	7.69119	110
CD99	0.846218	8.01495	110
CD99.1	0.705629	7.19689	110
CD99L2	0.834806	14.0185	110
CDA	1.02317	6.96479	110
CDADC1	0.609304	9.8864	84
CDAN1	0.940656	8.38701	47
CDC123	0.994448	11.2891	102
CDC14A	0.767206	11.617	48
CDC16	1.04598	10.6754	110
CDC23	0.85832	9.67878	110
CDC26	1.0923	10.8265	76
CDC34	0.821919	12.5651	110
CDC37	1.02555	12.2158	110
CDC37L1	1.33935	5.6232	110
CDC40	1.15436	7.67759	110
CDC42	0.787582	13.9818	110
CDC42BPA	1.48212	3.39182	106
CDC42BPB	1.64889	-7.90908	110
CDC42BPG	1.27157	5.54705	101
CDC42EP1	1.11917	9.12694	110
CDC42EP2	1.13554	8.80972	91
CDC42EP3	1.0386	0.93005	84
CDC42EP4	0.822338	13.762	110
CDC42EP5	1.32966	6.45397	110
CDC42SE1	0.814026	11.2781	64
CDC42SE2	1.22101	7.89972	105
CDC5L	1.28533	4.50897	110
CDC73	1.20744	10.0765	110
CDCP1	1.24852	7.54152	105
CDH1	1.05016	9.01779	110
CDH11	1.13122	10.9247	110
CDH13	1.37096	5.52122	110
CDH16	0.86262	10.684	110
CDH2	0.891877	12.1265	110
CDH4	1.33665	5.38295	60
CDH5	1.61583	-4.90088	110
CDH6	1.04221	8.41349	110
CDH9	1.47524	3.64424	66
CDHR2	1.04374	10.4176	110
CDHR5	0.945799	9.7911	110
CDIP1	1.27577	7.11131	92
CDIPT	0.535534	5.35465	110
CDK1	0.964189	12.1939	93
CDK11A	0.385546	12.1141	65
CDK11B	0.54644	7.48837	110
CDK12	1.014	12.4848	110
CDK13	1.1361	9.17971	49
CDK13.1	1.3108	8.0269	91
CDK14	0.666668	13.7694	110
CDK16	0.65229	11.5559	110
CDK17	1.05628	12.1242	110
CDK19	0.792967	12.9782	75
CDK2AP1	0.901597	14.568	110
CDK4	1.31681	5.22927	110
CDK5	1.07689	10.0457	110
CDK5RAP1	0.803566	6.05702	84
CDK5RAP2	1.12527	9.06957	110
CDK5RAP3	0.906426	11.2536	110
CDK6	1.20449	7.90701	110
CDK7	1.04008	12.5589	110
CDK9	1.13304	10.4109	110
CDKAL1	0.702256	13.3415	110
CDKL5	1.29302	8.81416	101
CDKN1A	0.822645	11.1452	53
CDKN1B	1.09309	9.83665	110
CDKN1C	0.850015	11.3149	93
CDKN2AIP	1.26423	8.52812	110
CDKN2AIPNL	1.01057	2.13643	96
CDKN2C	0.99261	11.9202	110
CDNF	1.02259	11.1528	64
CDPF1	0.744597	12.7572	62
CDR2	1.01407	7.55627	110
CDR2L	1.36645	3.84006	71
CDS1	1.34131	3.99347	86
CDS2	0.706145	13.2246	110
CDV3	0.658674	14.3982	110
CDYL	0.75466	14.474	110
CDYL2	1.55214	3.11682	53
CEACAM1	1.13277	7.06326	105
CEACAM4	1.33551	5.9813	80
CEBPA	1.38697	7.56554	47
CEBPB	1.30359	1.53763	110
CEBPD	1.29432	7.20031	35
CEBPZ	1.03302	11.5329	110
CEBPZOS	1.08796	11.0468	110
CECR2	0.661095	1.80494	50
CELF1	1.35868	4.54268	110
CELSR1	1.48944	-3.28672	110
CELSR2	1.21285	7.47059	110
CELSR3	0.679762	11.4553	53
CEMIP2	0.767187	12.9398	110
CEND1	0.458688	2.88043	32
CENPB	0.851696	13.5449	110
CENPC	1.24779	8.38578	110
CENPF	1.51012	1.78159	43
CENPV	1.26594	3.29434	110
CEP104	0.998866	12.2603	86
CEP112	1.03155	12.1951	101
CEP120	0.764035	13.9206	105
CEP128	1.00499	11.6111	86
CEP131	1.14127	8.36717	110
CEP135	1.28326	6.67368	110
CEP164	0.565267	8.17341	56
CEP170.1	0.614095	-2.87397	95
CEP170B.1	0.894482	13.5183	97
CEP192	1.08373	11.5064	96
CEP250	0.885359	13.7386	110
CEP290	0.741341	10.4757	81
CEP350	0.730071	14.3377	110
CEP41	0.719568	14.6592	110
CEP44	0.872845	13.5786	110
CEP57	1.11669	10.9078	88
CEP63	0.648241	8.03298	40
CEP68	1.14965	9.24232	110
CEP76	0.620969	10.1117	34
CEP78	0.632915	7.15369	59
CEP83	1.14513	7.41335	31
CEP85	0.585257	11.7423	47
CEP89	0.533695	13.0126	70
CEP95	1.1905	5.79373	42
CEP97	0.527638	9.25127	106
CEPT1	0.88991	12.8285	105
CERS2	1.2098	1.56113	110
CERS4	0.804691	9.51258	105
CERS5	1.22565	8.38597	85
CERS6	0.676175	11.865	60
CES1	0.375652	7.4424	88
CES2	1.03044	4.25793	110
CES3	0.785287	4.97967	87
CETN2	0.788086	14.0201	110
CETN3	0.866809	14.3762	110
CETP	1.0687	3.42549	110
CFAP20	0.872971	12.8578	110
CFAP298	1.05917	11.5264	110
CFAP36	0.95224	12.4654	110
CFAP97	0.96861	13.2106	106
CFB	1.11523	10.0106	110
CFD	1.18354	-0.166693	110
CFDP1	1.20964	6.02735	110
CFH	1.16139	3.47374	110
CFHR1	0.663315	7.69542	110
CFHR2	1.10528	1.28151	110
CFHR3	1.02465	5.83652	110
CFHR4	0.979367	3.7673	106
CFHR5	0.670631	3.08051	110
CFI	1.15145	1.49955	110
CFL1	1.20419	10.9272	110
CFL2	0.923962	12.7085	110
CFP	1.15314	8.29142	110
CFTR	1.3985	-0.760202	72
CGAS	1.07219	10.4557	56
CGGBP1	1.42174	1.77635	110
CGN	0.914476	9.23692	110
CGNL1	1.12801	10.1899	110
CGREF1	1.25716	8.22226	105
CHAC2	1.19661	6.7531	94
CHAD	0.0538072	-3.75212	110
CHAF1A	0.753627	11.7421	86
CHAMP1	1.14515	9.28832	110
CHCHD1	0.957954	11.7634	110
CHCHD10	0.884024	10.3259	110
CHCHD2	1.1624	8.80656	110
CHCHD3	0.786866	13.8169	110
CHCHD4	0.982229	12.4169	110
CHCHD5	1.12131	10.0142	110
CHCHD6	1.17281	8.70638	110
CHCHD7	0.767504	13.9582	110
CHD1	1.10467	10.0223	110
CHD1L	1.13297	10.7113	110
CHD2	1.02801	11.8318	110
CHD3	0.88075	13.6892	110
CHD4	1.06881	11.7091	110
CHD8	0.941163	12.9825	106
CHD9	1.15412	8.58384	43
CHDH	0.674961	11.607	110
CHEK1	0.716875	6.33989	42
CHEK2	1.26171	8.37143	105
CHERP	1.17962	10.2073	110
CHGA	1.39094	1.63697	89
CHGB	0.58537	11.4248	52
CHI3L1	0.952624	2.19607	110
CHID1	0.963386	10.2297	110
CHIT1	1.16362	8.10248	110
CHKA	1.03689	4.10553	58
CHKB	0.936712	12.8805	110
CHL1	0.45776	12.7968	64
CHM	1.02112	11.6051	110
CHML	1.35169	4.69385	98
CHMP1A.1	1.04804	12.0309	110
CHMP1B	0.784916	14.7643	110
CHMP2A	0.810734	14.2565	110
CHMP2B	0.918548	13.1911	110
CHMP3	1.2534	7.3447	110
CHMP4A	0.976583	11.8123	110
CHMP4B	0.697559	9.73369	110
CHMP4C	0.954075	7.78837	110
CHMP5	1.1192	11.3	110
CHMP6	0.886783	13.1681	110
CHMP7	0.940067	10.1686	110
CHN1	1.47484	5.59837	56
CHN2	1.17471	8.57935	80
CHORDC1	0.92365	11.3835	110
CHP1	0.542099	2.65136	110
CHPF	1.03693	8.4271	43
CHPF2	1.02885	8.82519	69
CHPT1	1.12842	9.3262	64
CHRAC1	1.31322	7.03985	110
CHST12	1.30195	7.2748	45
CHST13	0.889521	6.89219	66
CHST14	0.545406	10.5472	92
CHST15	1.21336	1.49198	41
CHST9	1.22607	4.85431	50
CHSY1	0.599468	13.3924	76
CHTF18	1.29207	8.7432	34
CHTOP	0.833481	14.2772	110
CHUK	1.07072	9.82939	110
CHURC1	0.86799	8.40156	110
CIAO1	1.25796	6.09442	110
CIAO2A	1.16973	8.09511	110
CIAO2B	1.21431	8.6959	110
CIAO3	1.23097	2.60816	110
CIAPIN1	1.09649	-3.45156	110
CIB1	1.09182	5.29031	110
CIC	1.03035	12.1295	110
CINP	0.977374	11.5684	110
CIP2A	1.91739	-3.02051	57
CIR1	1.1679	9.9481	110
CIRBP	0.888589	13.7497	110
CISD1	1.2043	1.64885	110
CISD2	0.890434	8.32752	110
CISD3	0.689918	14.299	110
CIT	1.2988	-1.85059	110
CIZ1	1.10455	6.55847	110
CKAP4	0.941994	12.5627	110
CKAP5	0.998838	11.7702	110
CKB	1.18928	-9.34968	110
CKM	1.11535	11.6397	101
CKMT1A	0.708541	9.42736	110
CKMT2	0.650295	10.7685	110
CKS1B	0.961931	12.9215	89
CLASP1	0.591735	13.3945	105
CLASP1.1	0.711798	9.95112	110
CLASP2	0.951328	14.0437	105
CLASP2.1	1.24147	7.94779	110
CLASRP	1.21466	9.20125	100
CLC	0.8564	6.85995	110
CLCC1	1.06271	12.6417	110
CLCN5	1.04676	11.1795	110
CLCN6	1.23236	9.01323	62
CLCN7	1.14399	4.38178	110
CLCNKA	0.924117	6.54174	64
CLCNKB	0.923419	10.3743	42
CLCNKB.1	1.01256	8.70601	38
CLDN10	0.602887	12.5305	78
CLDN2	1.16443	10.4306	110
CLDN23	0.631984	7.50374	36
CLDN3	1.04576	-1.72912	110
CLDN7	1.3232	6.97827	88
CLDND1	0.677523	12.8477	83
CLEC11A	1.02803	-8.43802	110
CLEC14A	1.2957	0.825636	110
CLEC16A	1.00304	11.2947	110
CLEC18B	1.18285	7.88863	30
CLEC3B	1.25085	7.57829	110
CLGN	0.957942	1.73281	47
CLIC1	0.628023	14.4041	110
CLIC2	1.41494	4.6821	110
CLIC3	0.604105	9.53749	74
CLIC4	0.787984	12.2541	110
CLIC5	0.98966	12.8576	97
CLIC6	1.39976	-19.0688	110
CLINT1	0.773973	8.56723	70
CLINT1.1	1.39303	4.64741	110
CLIP1.1	0.82974	13.1472	106
CLIP2	0.779441	12.7226	102
CLK2	1.69182	-0.0177279	46
CLK3	0.928639	10.936	88
CLK4	1.14223	-1.27448	36
CLMN	1.13313	10.6378	110
CLN3	1.42769	3.41502	61
CLN5	0.313902	5.08479	110
CLN6	0.753551	12.7896	110
CLN8	0.600271	8.7283	83
CLNK	1.55808	2.05865	37
CLNS1A	1.01405	8.20184	110
CLOCK	1.0804	11.1995	79
CLP 1	1.29375	7.92555	110
CLPB	0.81284	3.92482	110
CLPP	1.06444	4.53204	110
CLPTM1	0.810296	14.3776	110
CLPTM1L	0.824285	14.0046	110
CLPX	1.07969	0.185654	110
CLRN3	1.13755	6.7057	105
CLSTN1	1.34367	-5.95637	110
CLSTN3	1.03631	9.49409	86
CLTC	1.02002	12.6679	110
CLTRN	1.09478	8.87276	110
CLU	0.956797	0.981289	110
CLUAP1	0.901554	11.3981	110
CLUH	1.0163	11.9227	110
CLYBL	0.873739	5.72615	110
CMA1	1.21209	-0.276576	110
CMAS	1.04456	10.2624	110
CMBL	1.22519	4.23393	110
CMC1	1.02686	12.2461	110
CMC2	0.793958	8.56019	110
CMC4	1.43446	4.21977	110
CMIP	1.10488	8.93516	110
CMPK1	1.10772	11.3986	110
CMPK2	0.924358	13.003	110
CMSS1	0.810836	13.8478	110
CMTM4	0.495964	10.4801	110
CMTM6	1.23808	5.4871	65
CMTR1	0.960896	12.8969	110
CMTR2	1.39061	5.32587	110
CNBP	1.3592	-25.7217	105
CNBP.1	1.45782	-28.7027	110
CNDP1	1.10623	-0.620676	110
CNDP2	1.19328	9.98415	110
CNGA3	0.940171	10.1119	49
CNIH4	1.35893	3.54946	110
CNKSR1	1.77691	-2.61877	30
CNKSR3	0.954829	12.9011	110
CNN1	1.0085	2.99595	110
CNN2	0.844008	7.20807	110
CNN3	0.687238	13.7376	110
CNNM2	0.723085	12.4477	88
CNNM3	0.854444	14.2363	110
CNNM4	1.06021	9.161	101
CNOT1	1.0781	12.5062	110
CNOT10	0.851173	3.58283	110
CNOT11	0.705169	13.6376	110
CNOT2	1.0351	11.5935	110
CNOT3	0.888978	13.5555	110
CNOT4	0.952221	13.6441	110
CNOT6L	1.29692	7.04696	110
CNOT7	1.22208	9.19637	110
CNOT8	0.756248	8.27863	97
CNOT9	0.839982	13.5714	110
CNP	0.916821	0.396327	110
CNPY2	1.09825	7.66203	110
CNPY3	0.856386	14.4954	110
CNPY4	0.798714	13.4858	110
CNRIP1	1.36872	4.49699	110
CNST	0.603748	13.5451	110
CNTN1	0.974552	10.8367	100
CNTRL	1.01478	10.6975	84
CNTROB	0.872765	13.5527	106
COA1	0.957758	11.5638	110
COA3	0.595665	9.70194	110
COA4	0.848421	13.4491	110
COA5	0.7593	13.1385	110
COA6	0.933999	13.4022	110
COA7	0.966607	9.23847	110
COASY	0.667766	9.34199	110
COBL	0.949696	10.2738	37
COBLL1	1.6171	6.18831	84
COBLL1.2	0.915892	7.92172	43
COCH	0.52533	12.9413	110
COG1	1.09683	10.1311	110
COG2	1.31614	2.81873	110
COG3	1.28799	5.8105	110
COG4	1.54355	0.599453	110
COG5	1.47385	1.81985	110
COG6	1.15966	10.1807	110
COG7	1.56272	-2.52814	110
COG8	1.38823	1.37952	110
COIL	0.383228	11.1242	110
COL12A1	1.02433	5.22137	110
COL14A1	0.679432	11.7732	110
COL15A1	1.10571	10.3655	110
COL16A1	1.14589	10.6025	106
COL18A1	1.08885	9.24827	110
COL1A1	0.989663	12.9314	110
COL1A2	1.0273	12.5765	110
COL23A1	1.60337	-1.85877	100
COL28A1	0.983085	9.97316	31
COL2A1	1.0787	11.1603	96
COL3A1	1.0344	7.26476	110
COL4A1	0.831252	6.47423	110
COL4A2	0.98027	5.18859	110
COL4A3	0.949829	9.68668	110
COL4A3BP	1.46549	-2.21962	110
COL4A4	0.996053	8.97235	101
COL4A5	1.17871	9.78746	87
COL4A6	0.797866	10.2158	44
COL5A2	0.904994	12.1834	110
COL5A3	1.28782	-3.49882	110
COL6A1	1.05847	11.776	110
COL6A2	0.897319	13.4213	110
COL6A3	1.48497	0.952803	110
COL6A3.1	1.01389	10.4039	110
COL7A1	0.320093	1.27944	73
COL8A1	1.03954	11.859	106
COL9A2	0.987653	4.70997	37
COLEC10	0.813075	9.26758	78
COLEC11	1.24082	7.16462	110
COLEC12	0.827971	5.14323	38
COLGALT1	0.709938	14.4922	110
COMMD1	0.798484	12.7796	110
COMMD10	0.863998	14.11	110
COMMD2	1.05308	12.5428	110
COMMD3	0.674882	14.4381	106
COMMD3-BMI1	0.852055	13.6603	110
COMMD4	0.915113	14.116	110
COMMD5	1.37485	6.87603	110
COMMD6	0.86069	13.1038	110
COMMD7	1.14985	10.9904	110
COMMD8	1.19986	-9.81003	61
COMMD9	0.715805	14.5994	110
COMP	0.971847	10.8618	110
COMT	1.07219	-4.95295	110
COMTD1	0.795299	-1.35313	110
COP 1	0.93115	11.7674	62
COPA	1.53228	-0.672096	110
COPB1	1.6012	-5.18256	110
COPB2	1.48408	0.463248	110
COPE	1.09116	11.7668	110
COPG1	1.57515	-4.31556	110
COPG2	1.27006	4.89862	110
COPRS	0.559516	14.6828	110
COPS3	1.05798	11.7012	110
COPS4	1.40683	2.90555	110
COPS5	0.832224	14.2017	110
COPS6	1.0346	12.7403	110
COPS7A	0.816432	13.0067	110
COPS7B	0.916806	12.5062	110
COPS8	1.12261	6.35848	110
COPS9	0.927593	7.66621	110
COPZ1	1.24461	8.66749	110
COPZ2	1.35467	4.98071	110
COQ10A	0.785645	12.9834	83
COQ10B	0.932651	-1.23538	82
COQ3	0.542268	13.0364	110
COQ4	1.21555	8.34748	87
COQ5	0.849252	12.0054	110
COQ6	0.666228	13.8086	110
COQ7	0.999626	6.58486	110
COQ8A	0.999394	11.4656	110
COQ8B	1.40069	2.79582	110
COQ9	0.710248	4.76587	110
CORO1A	1.09981	12.0819	110
CORO1B	0.699332	12.7626	110
CORO1C	1.09486	8.69094	110
CORO2A	1.04225	12.7979	106
CORO2B	0.832379	10.9568	110
CORO7	1.11615	10.0881	82
CORO7-PAM16	0.868663	9.38046	110
COTL1	0.910685	13.0711	110
COX11	1.25854	6.19107	110
COX15	1.02777	10.1364	110
COX16	1.08642	10.8464	53
COX17	0.739797	14.6025	110
COX18	0.927191	12.5235	110
COX19	0.944217	7.56682	110
COX20	0.966093	11.9448	110
COX4I1	0.589382	5.59518	110
COX5A	0.762391	-0.909513	110
COX5B	0.782955	-4.07744	110
COX6A1	1.01312	8.76135	110
COX6B1	0.712945	-3.91645	110
COX6C	0.8269	7.83789	110
COX7A1	0.786953	13.3008	110
COX7A2	0.922242	8.54541	110
COX7A2L	0.728464	8.09405	110
COX7B	1.03414	-1.09254	105
COX7C	0.575982	6.67234	110
COX8A	0.832231	8.59979	110
CP	1.06877	4.69669	110
CPA3	1.20272	-8.48282	110
CPB2	1.21588	4.00225	110
CPD	1.2362	-2.35896	110
CPE	0.893871	-5.02329	102
CPEB3	1.1128	11.2752	98
CPEB4	1.51059	0.951036	110
CPM	0.865772	8.47614	110
CPN1	1.12728	-5.13819	110
CPN2	1.07348	-1.79262	110
CPNE1	0.541773	5.34335	110
CPNE2	0.890897	13.2815	110
CPNE3	1.12075	9.43683	110
CPNE6	0.776315	14.1234	92
CPNE8	1.09194	12.132	110
CPOX	0.758158	3.82569	110
CPPED1	1.03999	10.9597	110
CPQ	0.182236	8.70321	110
CPS1	0.795821	3.6194	110
CPSF1	1.19493	7.96541	110
CPSF2	1.11872	10.8158	110
CPSF3	1.03513	11.4679	110
CPSF4	0.685055	13.6476	110
CPSF6	1.12324	5.45744	110
CPSF7	1.61888	-5.12143	110
CPT1A	0.703118	13.9081	110
CPT1B	0.524672	3.28883	69
CPT2	0.844348	9.2753	110
CPTP	0.996749	9.55231	110
CPXM1	0.807816	8.78004	57
CPXM2	1.19409	4.77047	110
CR1	1.33021	-4.53109	97
CR2	1.36241	8.05353	50
CRABP1	0.141586	7.91243	92
CRABP2	1.09294	8.98922	105
CRACR2A	1.40979	-0.444367	102
CRACR2B	1.09686	5.06664	66
CRADD	1.35279	5.62886	110
CRAT	0.482004	5.60967	110
CRB2	1.67464	-16.0904	79
CRB3	1.29531	8.00324	77
CRBN	0.522831	5.37253	110
CRCP	0.74384	12.9708	105
CREB1	1.40329	-0.917437	110
CREB3L4	1.30033	6.10043	31
CREB5	0.69306	12.0864	78
CREBBP	1.23591	8.62283	110
CREBRF	1.74717	-1.41604	32
CREG1	0.949076	10.9243	110
CRELD1	1.20761	8.87272	110
CRELD2	0.871278	11.9267	110
CRHBP	0.944441	10.8731	110
CRIM1	0.920637	11.4206	110
CRIP1	1.14683	10.5924	110
CRIP2	1.266	7.39666	110
CRIP3	1.99911	3.43952	42
CRIPT	0.866465	5.35344	110
CRISP3	0.701512	1.33906	110
CRISPLD2	0.731603	12.7308	69
CRK	0.953828	11.0584	52
CRK.1	0.717237	14.3156	110
CRKL	1.02544	13.1986	110
CRLF3	1.45412	1.67002	110
CRLS1	1.16737	5.1318	63
CRMP1	1.34007	3.97768	110
CRNKL1	0.999773	9.13881	110
CROCC	1.40195	4.0451	110
CROT	0.630745	13.2117	110
CRP	1.02814	-1.07071	110
CRTAC1	1.0802	8.22394	110
CRTAP	1.49483	-2.97164	110
CRTC1	0.975914	12.0762	110
CRTC2	1.01063	12.506	110
CRTC3	1.23692	9.04699	110
CRY2	1.0177	7.72043	70
CRYAA	0.955595	9.28955	110
CRYAA2	1.30984	5.90589	61
CRYAB	1.24453	5.53106	110
CRYBB3	0.702438	-17.0222	110
CRYBG1	1.29111	5.7642	110
CRYBG3	0.662787	11.5411	110
CRYL1	1.10361	12.0907	110
CRYM	0.871979	6.12638	110
CRYZ	0.807873	12.3978	110
CRYZL1	1.0742	11.3714	110
CS	0.960733	3.75666	110
CSAD	1.19541	9.9125	110
CSDC2	1.28485	1.71176	110
CSE1L	0.668256	14.7027	110
CSF1	1.30535	7.7927	72
CSF1R	0.940109	9.06081	106
CSGALNACT1	1.35167	7.22908	49
CSK	0.708367	14.3886	110
CSNK1A1	1.05852	11.7807	110
CSNK1A1.1	0.990072	6.81487	68
CSNK1G1	1.06299	11.1768	101
CSNK1G2	0.851447	11.1966	52
CSNK1G3	0.628018	1.40563	89
CSNK2A1	1.40534	2.74247	110
CSNK2A2	0.688693	13.3194	110
CSNK2B	1.0583	0.160127	110
CSPG4	1.12938	10.3669	110
CSRP1	1.05444	4.64554	110
CSRP2	1.36446	5.55683	110
CST3	0.896685	12.2326	110
CST6	1.0783	11.8458	110
CST7	0.942207	7.01171	68
CSTA	1.00293	0.00974829	110
CSTB	0.805463	8.84834	110
CSTF1	0.743127	14.745	110
CSTF2	1.26488	5.44826	110
CSTF2T	1.23387	8.9774	110
CSTF3	1.20927	9.97173	110
CTAGE9	1.37487	7.74837	35
CTBP2	1.28658	7.23908	110
CTBS	0.777007	6.22119	110
CTCF	0.853576	13.9426	110
CTDNEP1	0.7665	11.3451	39
CTDP1	1.35695	6.26591	110
[truncated: 7,964 more rows]

## Sheet: CPTAC_COAD_N
	BI_mean	bic_diff_mean	N
A1BG	0.976821	9.52298	100
A1CF	0.598042	13.6229	93
A2M	0.878341	12.8162	100
AAAS	0.160624	10.039	100
AACS	0.173066	2.23648	100
AAGAB	1.23193	7.12499	100
AAK1	0.675153	13.529	100
AAMDC	0.563306	14.2208	100
AAMP	0.74338	14.9104	100
AAR2	0.187705	8.92979	100
AARS	1.05993	11.4722	100
AARS2	0.880103	12.0901	100
AASDHPPT	1.85124	-0.29377	100
AASS	0.698572	13.5275	83
AATF	0.368272	13.9031	100
ABAT	0.0358496	7.16162	100
ABCA8	0.596944	13.9675	100
ABCB1	0.269345	-7.36949	100
ABCB10	0.371875	9.20002	88
ABCB6	0.889687	5.64572	88
ABCB7	0.638235	10.9079	100
ABCB8	0.523778	2.2972	88
ABCC1	0.682256	8.56269	100
ABCC3	0.603743	14.3792	100
ABCC4	0.01184	9.87535	83
ABCD1	0.0195732	3.15299	68
ABCD3	1.03635	12.924	100
ABCE1	0.0169411	8.98162	100
ABCF1	0.284414	8.70791	100
ABCF2	0.677635	12.4206	100
ABCF3	0.355172	4.88371	100
ABHD10	0.446635	-2.19446	100
ABHD11	0.395066	14.2018	100
ABHD12	0.769362	13.3187	100
ABHD14B	0.936353	12.0363	100
ABHD16A	0.162048	-4.67731	100
ABHD17C	0.647986	9.23807	56
ABHD6	0.0275872	-1.13025	83
ABI1	0.359726	1.74144	100
ABI2	0.491182	11.5294	57
ABI3	0.668181	14.5938	100
ABI3BP	0.0097419	4.24262	100
ABL1	1.17985	2.93275	73
ABLIM1	0.205836	-1.38219	100
ABO	0.998971	11.5728	56
ABR	0.813793	13.9725	100
ABRACL	0.326437	-0.941995	100
ABT1	1.17785	8.57423	32
ACAA1	0.91011	-3.27651	100
ACAA2	0.705753	13.6797	100
ACACA	0.548747	13.3037	100
ACAD10	0.413004	11.0269	100
ACAD8	0.400233	12.0334	100
ACAD9	0.477269	14.5422	100
ACADM	0.596081	14.262	100
ACADS	1.02632	10.3319	100
ACADSB	0.46982	0.465933	100
ACADVL	0.443936	14.4503	100
ACAN	0.452095	3.95139	61
ACAP1	0.871763	10.6082	63
ACAP2	0.83529	14.659	100
ACAT1	0.0944295	4.11402	100
ACAT2	0.451541	8.88394	100
ACBD3	0.523219	14.5697	100
ACBD5	0.191989	4.30505	100
ACBD6	0.882764	8.32712	39
ACE	0.324948	-19.5713	91
ACE2	0.264132	-27.1518	91
ACIN1	0.919717	14.1596	100
ACLY	0.177583	7.41508	100
ACO1	0.478202	4.98358	100
ACO2	0.137107	7.00235	100
ACOT1	0.282075	11.0413	100
ACOT11	0.694371	11.2476	100
ACOT13	0.758889	-11.0473	100
ACOT7	0.723198	14.5378	100
ACOT8	0.433725	14.3483	100
ACOT9	0.625676	8.91479	100
ACOX1	1.21045	8.73164	100
ACOX2	0.704934	9.51285	52
ACOX3	0.409866	14.0809	100
ACP1	0.579001	13.8061	100
ACP2	0.395362	11.5156	100
ACP5	0.202765	-24.0579	63
ACP6	0.55327	-8.72434	100
ACPP	1.30687	2.86314	38
ACSF2	0.469708	13.6897	100
ACSF3	0.721104	13.1699	100
ACSL1	0.719227	0.323466	100
ACSL3	0.0239099	8.70031	100
ACSL4	0.319269	12.1796	100
ACSL5	3.15938	-20.5596	100
ACSM3	0.543618	14.156	100
ACSS1	0.298821	9.68845	100
ACSS2	0.84184	8.3219	100
ACTA1	0.678487	8.09305	41
ACTA2	0.675836	11.7136	63
ACTB	0.714581	10.2651	31
ACTBL2	0.210722	3.7036	100
ACTG1	0.536282	14.4874	100
ACTG2	0.700849	1.58509	100
ACTL6A	0.328015	-24.0765	100
ACTN1	0.974924	1.19985	100
ACTN2	0.414704	7.82965	100
ACTN4	0.45652	-7.25564	100
ACTR10	0.608305	10.0351	100
ACTR1A	0.552043	14.4134	100
ACTR1B	0.688436	13.1661	100
ACTR2	0.555379	14.3133	100
ACTR3	0.0742036	6.20779	100
ACTR5	0.711836	11.4828	72
ACTR8	1.11754	9.5859	45
ACY1	0.79548	-31.0808	100
ACYP1	0.514805	9.67859	90
ACYP2	0.980021	13.4792	94
ADA	0.863123	13.5019	98
ADA2	7.05567	-27.5687	92
ADAM10	0.366278	3.60949	100
ADAM15	1.0082	11.3677	51
ADAM17	0.583466	-22.8905	93
ADAM9	0.621291	13.815	100
ADAMDEC1	0.563423	11.965	88
ADAMTSL4	0.668423	13.171	95
ADAP1	0.314292	3.10989	100
ADAR	0.762552	10.4041	100
ADCK5	5.2659	-12.6507	49
ADCY6	0.154206	-3.80681	86
ADD1	0.361415	10.299	100
ADD2	0.337572	8.68947	92
ADD3	0.523527	4.25276	100
ADGRE5	0.694437	8.98136	100
ADGRG1	0.756678	2.79891	83
ADH1A	1.18526	8.72252	31
ADH1B	0.949409	5.23255	100
ADH1C	0.475791	5.39037	100
ADH4	0.728776	10.487	63
ADH5	0.283387	11.7969	100
ADH6	1.20197	9.22428	36
ADI1	0.581277	10.507	96
ADIPOQ	0.622963	9.51846	59
ADIRF	1.04646	11.7192	100
ADK	0.679898	14.2793	100
ADNP	0.785843	14.5119	100
ADO	0.839386	13.6448	100
ADPGK	0.617068	13.5095	100
ADPRH	0.350524	11.2993	96
ADPRHL2	0.608179	14.5722	100
ADRM1	0.694133	13.2379	100
ADSL	0.0448762	7.86253	100
ADSS	0.668563	11.7419	100
ADTRP	0.595355	12.5941	62
AEBP1	1.00819	13.1977	100
AES	0.46037	11.7785	53
AFAP1	0.47591	14.0464	93
AFAP1L2	0.165611	-13.7757	95
AFDN	1.04193	9.57093	100
AFF4	0.639292	6.75271	53
AFG1L	0.642251	10.5151	40
AFG3L2	0.560014	13.2321	100
AFM	1.10819	12.1344	100
AFTPH	0.635489	5.19254	100
AGAP1	1.28102	-12.3018	59
AGAP3	0.560847	-28.4326	72
AGFG1	0.398193	-0.962184	100
AGFG2	0.0604039	5.75014	100
AGK	0.131186	-1.66513	100
AGL	0.819414	10.6155	100
AGMAT	0.691912	2.40827	100
AGO1	0.0588157	4.19234	100
AGO2	0.609034	14.1897	100
AGO3	0.983256	11.0303	91
AGPAT1	0.738152	12.8678	100
AGPAT2	1.0329	10.7734	95
AGPAT3	0.957668	8.0051	100
AGPAT5	0.407323	14.2936	100
AGPS	0.838728	10.7014	100
AGR2	0.720282	13.8714	100
AGR3	0.904777	14.1365	100
AGRN	1.00355	11.8451	100
AGT	0.895901	12.4402	100
AGTRAP	0.508812	11.8799	87
AHCTF1	0.312684	-57.4724	100
AHCY	0.777781	9.51396	100
AHCYL1	0.851992	7.60085	100
AHCYL2	0.634651	9.60276	100
AHNAK	0.752506	13.2319	100
AHNAK2	1.16149	1.614	100
AHR	0.560104	9.79455	80
AHSA1	0.812259	14.3086	100
AHSG	1.05119	7.95183	100
AHSP	1.3228	8.662	60
AIDA	0.46669	6.80634	100
AIF1	0.495132	13.0704	93
AIFM1	0.781156	-0.593224	100
AIFM2	0.916239	12.5067	80
AIG1	0.835068	9.34967	46
AIM1	0.334249	0.93726	100
AIMP1	1.02725	12.4388	100
AIMP2	0.410469	-10.4024	100
AIP	0.591617	14.4508	100
AK1	1.09978	-3.36518	100
AK2	0.0941682	6.04226	100
AK3	0.558357	13.6779	100
AK4	0.6894	8.2983	100
AKAP1	0.045724	1.26419	100
AKAP12	1.04921	6.58109	100
AKAP13	0.424322	1.49121	100
AKAP17A	1.72117	-8.08361	78
AKAP5	0.0115194	-25.5222	55
AKAP8	0.577689	14.3922	100
AKAP8L	0.676544	10.6384	100
AKAP9	0.133838	9.37939	100
AKR1A1	0.937798	12.941	100
AKR1B1	1.28173	4.77172	100
AKR1B10	0.808869	12.5042	100
AKR1C2	0.731376	0.810227	89
AKR1C3	0.838463	13.7656	100
AKR1D1	0.66713	-6.80038	85
AKR7A2	0.427658	7.26017	100
AKR7A3	0.373512	14.1747	100
AKT1	1.54715	-2.37864	100
AKT1S1	0.0997301	-13.7445	91
AKT2	1.24241	10.3527	79
AKTIP	0.782935	7.12152	58
ALAD	0.51659	9.34535	100
ALB	0.973451	-5.68358	100
ALCAM	1.05712	1.56818	100
ALDH16A1	0.579319	12.3029	100
ALDH18A1	0.684796	13.5766	100
ALDH1A1	0.633095	12.1107	100
ALDH1A3	0.301966	0.67567	100
ALDH1B1	0.374296	0.587611	100
ALDH1L1	0.810196	11.3552	100
ALDH1L2	0.581663	14.3081	100
ALDH2	0.300693	-26.7017	100
ALDH3A2	0.579999	13.7312	100
ALDH3B1	0.642126	10.6217	33
ALDH4A1	0.591386	-17.8582	100
ALDH5A1	0.663877	14.0901	100
ALDH6A1	0.551596	14.3517	100
ALDH7A1	0.547318	9.88452	100
ALDH9A1	0.58877	10.8973	100
ALDOA	0.901661	13.4391	100
ALDOB	2.50072	-49.64	100
ALDOC	0.623133	14.0446	100
ALG1	0.430084	-4.65724	100
ALG11	0.0324508	8.26738	88
ALG12	0.587381	13.2213	78
ALG13	0.0286658	8.80259	90
ALG14	0.207836	-0.229776	53
ALG2	0.218339	9.31169	100
ALG5	0.6109	10.1594	100
ALG8	0.743358	3.51374	35
ALG9	0.828642	9.81156	76
ALKBH5	0.0254508	3.26878	68
ALOX15	0.780308	12.2246	100
ALOX5	0.840843	12.7532	100
ALOX5AP	0.552227	-4.94121	95
ALPL	0.373196	12.7448	76
ALYREF	0.543187	5.20688	100
AMACR	0.459755	13.9434	100
AMBP	0.550836	14.4262	100
AMDHD2	0.319317	10.1117	86
AMPD2	0.490917	13.2948	100
AMPD3	1.13783	9.7708	100
AMT	0.731163	-13.1599	100
AMY2A	0.800758	9.90827	62
ANAPC1	0.604085	5.1158	80
ANAPC16	0.934583	11.546	49
ANAPC2	0.91491	11.0667	43
ANAPC4	0.537727	-9.46002	85
ANAPC5	0.620598	3.57568	85
ANAPC7	0.529149	7.431	100
ANG	0.670571	13.5086	100
ANGPTL2	0.81851	13.9908	100
ANK1	0.734915	8.90483	100
ANK2	1.15187	9.47217	100
ANK3	1.02088	11.6896	100
ANKFY1	0.0084719	0.293032	100
ANKHD1	0.221389	-6.26524	100
ANKLE2	0.7182	3.43589	70
ANKMY2	0.611382	11.1214	100
ANKRD13A	0.108327	2.93136	100
ANKRD17	0.0622556	-17.128	89
ANKRD22	0.193655	4.88282	100
ANKRD27	1.31218	9.5254	61
ANKRD28	0.566776	14.2496	93
ANKRD44	0.438095	14.2063	100
ANKRD54	0.555169	11.884	69
ANKS1A	0.850949	10.9316	100
ANKS4B	0.0311068	-3.17292	100
ANKZF1	0.689333	7.32979	35
ANLN	0.6854	10.1481	45
ANO1	0.0663074	-2.48553	78
ANO10	0.839386	13.0297	100
ANO6	0.896339	13.5318	100
ANP32A	0.546352	11.7086	100
ANP32B	0.853075	13.7164	100
ANP32E	0.418589	13.3386	100
ANPEP	0.584519	4.69906	100
ANTXR1	1.10536	4.8376	66
ANTXR2	0.868305	13.2032	96
ANXA1	0.892707	11.0274	100
ANXA11	0.561068	13.567	100
ANXA13	0.719633	14.3751	100
ANXA2	0.973912	13.7043	100
ANXA3	0.609087	12.3951	100
ANXA4	0.885375	-2.97196	100
ANXA5	1.07391	10.7799	100
ANXA6	0.667059	13.6722	100
ANXA7	0.776753	10.7128	100
AOC1	0.865949	12.8781	100
AOC3	0.807082	4.14124	100
AOX1	1.44883	7.52281	42
AP1B1	0.8514	13.9421	100
AP1G1	0.947908	12.9619	100
AP1G2	0.808452	-51.4575	100
AP1M1	0.696454	9.87202	100
AP1M2	0.23766	6.78923	100
AP1S1	0.366762	12.6709	100
AP1S2	1.13994	9.67743	77
AP2A1	0.403526	13.2448	100
AP2A2	0.0616125	-7.40137	100
AP2B1	0.744006	13.8631	100
AP2M1	0.358752	8.42529	100
AP2S1	0.718701	-23.8001	100
AP3B1	1.06518	12.8152	100
AP3D1	1.29672	7.79195	100
AP3M1	1.06496	11.9689	100
AP3M2	0.485374	7.14588	95
AP3S1	10.9923	-64.841	100
AP5B1	0.815014	13.5678	86
AP5Z1	0.136614	7.26949	48
APAF1	0.171907	-13.1378	100
APBB1IP	0.118748	3.4987	100
APBB2	0.724556	11.8066	52
APCS	0.809701	11.9077	100
APEH	1.06403	11.9788	100
APEX1	0.906301	12.5782	100
API5	0.545858	12.2994	100
APIP	1.0101	12.5996	100
APLP2	0.223297	-2.76495	100
APMAP	0.824862	13.861	100
APOA1	0.498476	12.9961	100
APOA2	0.866658	12.1676	100
APOA4	0.771044	13.9972	100
APOB	0.709523	14.3336	100
APOBEC3C	0.775466	11.3304	44
APOBEC3F	0.531475	11.2153	48
APOBEC3G	1.33369	7.17079	54
APOBR	0.5574	13.9879	100
APOC1	0.948855	13.4097	100
APOC2	0.929974	13.0509	97
APOC3	0.689835	13.7412	100
APOD	0.45615	9.80325	100
APOE	0.838957	12.3766	100
APOF	0.794562	-1.19579	60
APOH	0.544431	14.1437	100
APOL1	1.00997	13.1595	94
APOL2	0.26324	2.03454	100
APOL3	0.514556	11.9763	100
APOM	0.669542	13.9538	100
APOO	0.533499	14.0833	100
APOOL	1.11056	11.4459	100
APP	0.802691	8.63459	100
APPL1	0.664788	14.441	100
APPL2	0.658945	14.5461	100
APRT	1.0359	12.3728	100
APTX	1.40117	7.59012	56
AQP1	0.83352	13.7947	93
AQP8	1.21955	9.42218	78
AQR	0.640452	9.95199	100
ARAF	6.6507	-22.2947	81
ARAP1	0.41951	8.99499	100
ARCN1	0.641241	14.312	100
AREG	0.806841	10.177	34
ARF1	0.848961	12.3553	95
ARF3	0.868974	3.81194	80
ARF4	0.696262	13.4299	100
ARF5	0.511186	13.597	100
ARF6	0.561643	12.8687	100
ARFGAP1	0.440277	5.01608	100
ARFGAP2	0.724483	13.6599	100
ARFGAP3	0.778113	8.49518	100
ARFGEF1	0.500148	11.0342	100
ARFGEF2	0.639595	14.4606	100
ARFGEF3	0.29729	-40.5138	81
ARFIP1	0.490534	13.6913	100
ARFIP2	0.81765	13.9046	94
ARFRP1	0.759287	13.6949	89
ARG1	0.11948	5.26399	100
ARGLU1	0.604999	13.5543	100
ARHGAP1	0.450143	-6.88548	100
ARHGAP10	0.752723	12.4781	100
ARHGAP12	0.356897	7.65193	75
ARHGAP15	0.665892	9.36193	61
ARHGAP17	0.743182	14.285	100
ARHGAP18	0.430524	9.89866	100
ARHGAP21	0.795743	10.1688	58
ARHGAP25	0.781358	12.7018	100
ARHGAP26	0.550757	-17.2236	86
ARHGAP27	0.211268	1.59935	100
ARHGAP30	0.881758	11.776	63
ARHGAP32	0.0311352	6.24351	48
ARHGAP35	0.65372	0.289794	93
ARHGAP4	0.728868	13.4962	100
ARHGAP45	1.04429	1.27938	100
ARHGAP5	0.257444	-19.5527	100
ARHGAP6	0.965521	9.12091	65
ARHGAP9	0.0739261	5.71464	86
ARHGDIA	0.752273	-18.1531	100
ARHGDIB	0.522377	12.783	100
ARHGEF1	0.471164	-14.274	100
ARHGEF10	1.5214	6.5657	36
ARHGEF10L	0.016136	6.44104	100
ARHGEF11	0.572567	13.4715	78
ARHGEF12	0.182189	6.11125	100
ARHGEF16	0.57342	14.16	100
ARHGEF17	0.878531	13.6165	100
ARHGEF18	0.504267	3.75903	100
ARHGEF2	0.626043	13.0799	100
ARHGEF25	1.2935	7.99431	36
ARHGEF37	0.653108	13.8252	87
ARHGEF40	0.144926	8.33217	80
ARHGEF5	0.545976	3.69845	81
ARHGEF6	0.63392	14.4586	100
ARHGEF7	0.49074	13.6721	100
ARID1A	0.278725	13.9379	93
ARID1B	0.34076	3.84217	91
ARID2	0.887668	13.4156	75
ARID3A	0.857439	12.9447	83
ARIH1	0.056141	2.16508	100
ARIH2	1.19787	-0.158078	88
ARL 1.00	0.88158	5.41393	100
ARL 15.00	0.0628489	-10.9905	100
ARL 2.00	0.0743383	-27.7883	100
ARL2BP	0.106064	9.54155	75
ARL 3.00	0.580571	7.58623	100
ARL 6.00	0.756006	10.4605	59
ARL6IP1	0.550237	10.6674	100
ARL6IP4	0.598803	-50.3423	100
ARL6IP5	0.619881	12.9535	100
ARL6IP6	1.09842	9.92823	75
ARL8A	0.640148	10.6242	91
ARL8B	0.763814	14.4764	100
ARMC1	0.539303	14.5617	100
ARMC10	0.15015	5.45879	100
ARMC6	0.738984	11.7814	100
ARMC8	0.535067	13.2771	93
ARMCX1	0.900003	10.5702	37
ARMCX2	0.790996	14.0358	84
ARMCX3	0.742392	14.2823	100
ARMT1	0.87509	13.6006	100
ARPC1A	0.768042	13.8437	100
ARPC1B	0.771216	13.664	100
ARPC2	0.946616	12.5611	100
ARPC3	0.233732	2.96527	100
ARPC4	0.766851	13.9256	100
ARPC5	0.115094	3.42301	100
ARPC5L	0.954846	6.55239	100
ARPP19	0.47474	12.5349	93
ARR3	0.581737	13.3843	94
ARRB1	0.653307	14.437	100
ARRB2	0.785081	12.0266	100
ARRDC1	0.503287	8.42609	88
ARSA	0.971313	13.2813	100
ARSB	0.811688	-16.772	91
ARSD	1.12259	8.37793	50
ARSE	0.345506	-9.9516	93
ARVCF	0.807458	11.9082	76
ASAH1	0.586663	7.52086	100
ASAP1	0.505111	12.3014	76
ASAP2	0.360054	13.5755	83
ASB9	1.88113	-2.9817	33
ASCC1	0.523182	9.80737	76
ASCC2	0.746643	12.5163	100
ASCC3	0.602877	4.33673	100
ASF1A	0.78504	-1.18777	69
ASH2L	0.736717	10.3116	100
ASL	0.730935	9.03637	100
ASMTL	0.762749	14.553	100
ASNA1	0.598444	1.74732	100
ASNS	0.307917	0.634275	100
ASPA	0.312411	10.6778	47
ASPH	0.40137	7.36161	100
ASPN	0.705726	14.5095	100
ASPSCR1	0.223316	0.686764	100
ASRGL1	0.786093	6.59703	76
ASS1	0.854941	10.4972	100
ATAD1	0.662375	9.2672	100
ATAD2	1.27782	1.61227	61
ATAD3A	0.769212	14.503	100
ATAD3B	0.555992	9.47601	37
ATE1	0.613044	12.9472	100
ATF1	0.51045	12.6284	61
ATF7IP	0.189013	-5.26545	47
ATG12	0.452044	11.4707	68
ATG16L1	0.598443	12.4171	100
ATG3	0.130336	6.29256	100
ATG4A	0.963482	7.88446	38
ATG4B	0.442878	-4.39088	100
ATG5	0.775429	12.7255	100
ATG7	0.105631	4.36292	100
ATG9A	0.665408	2.11883	67
ATIC	0.218623	8.54732	100
ATL1	0.947469	11.9608	100
ATL2	0.460652	14.3646	100
ATL3	0.556573	14.2641	100
ATM	0.871521	14.1337	100
ATOX1	0.41936	13.2495	100
ATP11B	0.894865	10.627	100
ATP11C	0.0804488	-3.2451	76
ATP12A	0.631155	13.2322	75
ATP13A1	0.606015	8.72269	100
ATP1A1	0.654695	14.2017	100
ATP1A2	1.13718	0.888861	97
ATP1A3	0.580388	11.1282	60
ATP1B1	0.667737	14.0817	100
ATP1B2	0.916728	6.93747	36
ATP1B3	0.196225	9.38667	100
ATP2A1	0.814758	13.2671	95
ATP2A2	0.676785	14.4775	100
ATP2A3	0.509007	14.4686	100
ATP2B1	0.911829	12.3926	100
ATP2B2	1.20875	7.55373	55
ATP2B4	0.836534	-2.68149	100
ATP2C1	0.468806	11.6843	93
ATP5A1	0.365036	12.0013	100
ATP5B	0.266033	-8.31169	100
ATP5C1	1.61523	-20.1	100
ATP5D	0.550609	-0.819358	100
ATP5E	0.358054	-7.16328	100
ATP5F1	4.67945	-5.19739	100
ATP5G1	0.929071	5.92765	100
ATP5H	0.208247	-1.99262	100
ATP5I	0.643559	7.43187	100
ATP5J	0.557214	14.3184	100
ATP5J2-PTCD1	0.543012	13.8682	100
ATP5L	0.343958	2.79041	100
ATP5O	0.553647	13.495	100
ATP5S	0.429181	14.2443	100
ATP5SL	0.248271	-10.1475	96
ATP6AP1	0.299854	-9.40046	100
ATP6AP2	0.282209	-12.3976	100
ATP6V0A1	0.915671	12.9355	100
ATP6V0A2	0.905785	12.6041	77
ATP6V0C	0.784594	12.0512	74
ATP6V0D1	0.574855	14.5523	100
ATP6V1A	0.137704	8.45087	100
ATP6V1B2	0.227799	-4.91523	100
ATP6V1C1	0.334097	7.43728	100
ATP6V1D	0.69106	12.4454	100
ATP6V1E1	0.199972	-14.8214	100
ATP6V1F	0.799226	14.8353	100
ATP6V1G1	0.570128	7.99834	100
ATP6V1H	0.662534	13.9831	100
ATP8A1	1.46345	-4.08172	83
ATP8B1	0.102765	5.58892	100
ATP9A	1.35054	-55.5356	100
ATPAF1	0.516927	14.1297	100
ATPAF2	0.312803	2.26694	89
ATPIF1	0.593027	13.9935	100
ATRAID	0.707543	-1.43146	86
ATRN	1.07285	11.4601	90
ATRX	0.427335	14.361	100
ATXN10	0.905887	14.0696	100
ATXN2	0.114904	-1.18496	100
ATXN2L	0.168549	1.59205	100
ATXN3	0.64968	14.2943	88
ATXN7L3B	0.394316	6.29872	57
AUH	0.340162	10.3596	100
AUP1	0.607237	9.83684	100
AVEN	0.272436	0.074385	94
AVL9	0.442341	14.0665	100
AZGP1	1.11305	-1.72221	100
AZU1	1.05806	10.6652	100
B2M	1.03307	10.5796	100
B3GALT5	0.972999	9.20325	74
B3GAT3	0.641637	12.9434	72
B3GLCT	0.00573572	3.86226	79
B3GNT3	0.61714	14.5563	100
B3GNT6	0.445897	12.0676	94
B3GNT7	1.3584	3.1115	62
B4GALNT2	0.422133	11.2185	65
B4GALT1	0.314166	9.78345	100
B4GALT4	0.747427	2.32639	100
B4GALT7	0.626979	9.83976	45
B4GAT1	0.49828	10.1152	47
BABAM1	9.5369	-50.1884	100
BACH1	2.31225	-8.58887	50
BAD	0.97672	8.1475	40
BAG1	0.0758716	7.87286	100
BAG2	0.961822	1.54901	100
BAG3	0.998722	9.36762	100
BAG4	0.962245	9.53847	36
BAG5	0.434833	-12.0935	100
BAG6	0.591049	5.88491	100
BAIAP2	0.865603	13.1317	100
BAIAP2L1	0.150157	1.28756	100
BAIAP2L2	0.879659	8.07255	39
BAK1	0.506664	-4.34806	70
BANF1	0.632638	10.3832	100
BASP1	0.630004	13.7399	100
BAX	0.559172	13.9224	100
BAZ1A	0.365826	-10.5813	75
BAZ1B	0.639591	14.4339	100
BAZ2A	0.833119	10.5813	74
BCAM	0.636325	14.711	100
BCAP29	0.705368	14.1769	95
BCAP31	0.844647	14.4577	100
BCAR1	0.485643	13.2833	83
BCAS1	0.378635	8.50736	100
BCAS2	0.186521	10.5902	100
BCAS3	0.658537	7.32354	72
BCAT1	0.816036	11.8815	52
BCAT2	0.466033	14.348	100
BCCIP	0.490571	12.9314	100
BCHE	0.135416	-1.88508	94
BCKDHA	0.502025	14.4481	100
BCKDHB	0.330243	10.5518	100
BCKDK	0.175039	-2.78839	100
BCL10	0.492727	11.3907	100
BCL2L1	0.0492798	-48.6202	98
BCL2L13	0.39561	-12.7065	100
BCL2L14	0.827684	2.67677	55
BCL2L15	0.45023	7.69841	100
BCL7C	0.676975	11.7598	54
BCLAF1	0.570535	14.1011	100
BCR	0.580881	-19.1481	100
BCS1L	0.278439	-2.6233	100
BDH1	0.519771	13.2154	100
BDH2	0.505504	2.65134	100
BECN1	0.190238	4.03635	83
BET1	0.124084	1.23326	83
BET1L	1.00459	6.20616	100
BGN	0.258689	8.13553	100
BICD2	0.0832528	9.26411	86
BID	0.457438	14.0127	100
BIN1	1.20517	9.11116	100
BIN2	0.779864	13.8075	95
BIN3	0.567939	10.794	98
BIRC2	0.215665	-1.85593	31
BIRC6	0.684255	8.60709	100
BLMH	0.369554	13.8077	100
BLNK	0.759117	1.577	33
BLOC1S1	0.2604	-27.1952	100
BLOC1S2	0.285921	-29.7373	79
BLOC1S3	0.41811	9.9333	87
BLOC1S4	0.014207	-6.54299	96
BLOC1S5	0.0626673	6.12885	84
BLOC1S6	0.437913	4.61788	88
BLVRA	0.927958	6.5041	100
BLVRB	0.544549	3.34995	100
BMP2K	1.42744	-24.9267	100
BMS1	0.151911	1.02421	100
BNIP1	0.762263	8.32658	66
BNIP2	0.943776	8.59173	40
BOD1L1	0.754126	14.0832	100
BOK	0.165897	7.46832	86
BOLA2	0.438334	12.3604	100
BOLA3	0.535044	12.7208	66
BOP 1.00	0.902412	11.8669	100
BORCS5	0.507117	10.0315	55
BORCS6	0.0445819	-12.8096	73
BORCS7	0.457206	10.3987	70
BPGM	0.495662	-0.115845	100
BPHL	0.600933	14.3646	100
BPI	0.131943	5.88042	100
BPNT1	0.594813	12.1303	100
BPTF	0.521473	12.6229	78
BRAP	0.611148	4.74892	86
BRAT1	0.486011	9.54203	77
BRCC3	10.7346	-62.6765	100
BRD1	2.30262	6.64517	34
BRD2	0.116967	-6.95297	86
BRD3	0.970067	11.9516	83
BRD4	1.07441	12.1278	100
BRD7	0.0476786	4.2205	71
BRD8	1.69476	5.93338	38
BRD9	1.70933	-7.4319	40
BRE	0.635823	9.45868	100
BRI3	1.02652	11.1623	59
BRI3BP	0.693347	7.34834	93
BRIX1	0.615747	12.261	100
BRK1	0.908775	12.7894	100
BROX	0.195292	1.04498	100
BRPF1	0.716336	11.5885	49
BSDC1	0.956038	3.93675	87
BSG	0.973967	9.66389	100
BSPRY	0.00460714	5.62912	100
BST1	0.178886	4.13312	100
BST2	0.982065	13.358	100
BTAF1	0.165887	0.515353	90
BTD	0.682691	14.5742	100
BTF3	0.479077	13.487	100
BTF3L4	0.00221825	4.16507	100
BTK	0.0285306	0.487774	71
BTN2A1	0.819436	7.52304	46
BTN3A3	0.436916	13.7272	83
BUB3	0.537029	14.1369	100
BUD13	0.69807	12.0955	51
BUD23	0.471309	1.59575	83
BUD31	0.815428	10.2245	100
BYSL	0.232702	8.55491	100
BZW1	0.586892	11.8228	100
BZW2	0.567986	9.85012	100
C10orf11	0.62597	8.54243	56
C10orf35	0.574862	11.7088	46
C10orf76	0.211062	-5.96614	100
C10orf99	0.422781	13.328	84
C11orf54	0.621083	7.76408	100
C11orf58	0.652994	10.5627	100
C11orf68	0.609617	11.5702	100
C11orf96	0.396742	8.98593	88
C11orf98	0.733026	14.4471	100
C12orf10	0.122567	2.12377	100
C12orf29	0.417745	5.6589	31
C12orf4	1.72364	0.769639	58
C12orf45	1.05924	1.97919	38
C12orf57	0.443993	12.9825	67
C14orf1	0.0124382	1.58005	90
C14orf159	2.6066	-32.7223	100
C14orf166	0.225288	5.58026	100
C14orf2	0.517514	13.9637	100
C15orf38-AP3S2	0.70871	14.2429	100
C15orf40	1.82811	6.31704	53
C15orf48	0.3023	-7.59577	100
C15orf52	0.805109	8.53219	100
C16orf58	0.21925	-30.18	100
C16orf62	0.209597	9.85914	100
C16orf70	1.36212	8.82561	36
C16orf91	0.825328	-0.0299523	46
C17orf49	0.349949	14.1769	100
C17orf58	0.950969	13.0297	98
C17orf62	0.993976	12.489	100
C17orf75	0.494512	-29.9308	100
C18orf25	3.55258	-9.58574	31
C18orf32	0.392033	12.805	100
C18orf8	0.636448	11.7328	96
C19orf25	0.834368	14.0429	100
C19orf33	0.864698	2.351	96
C19orf43	0.92868	11.8288	100
C19orf53	0.71276	13.5258	91
C19orf66	0.764032	3.85602	100
C19orf70	0.581039	-7.01742	100
C1D	0.0288267	-8.61451	51
C1GALT1	0.742709	9.86393	34
C1QA	0.647873	13.402	100
C1QB	0.760574	14.1712	100
C1QBP	0.918775	0.703063	100
C1QC	0.789014	7.8688	100
C1R	0.482849	13.7469	100
C1RL	0.517753	12.3016	68
C1S	0.624166	13.9876	100
C1orf116	1.06503	2.81276	87
C1orf122	2.13259	3.18196	36
C1orf123	0.707443	13.0939	100
C1orf174	0.661359	10.0968	57
C1orf198	1.07558	11.8906	94
C1orf21	1.06701	9.19747	41
C1orf210	1.22319	8.90257	35
C1orf27	0.652723	13.0515	100
C1orf35	0.704959	8.48062	95
C1orf50	0.661766	14.1454	86
C2	0.507635	13.9871	100
C20orf24	0.0345505	2.56883	60
C20orf27	0.604443	12.7227	90
C21orf33	0.429558	-0.97793	100
C21orf59	0.0785296	2.75334	76
C2CD5	0.109087	0.583156	100
C2orf49	0.688732	13.8193	79
C2orf69	0.330702	4.76873	55
C2orf72	0.230008	5.73671	47
C2orf88	3.95189	-2.70074	65
C3	0.559377	14.6263	100
C3orf38	0.59362	11.8225	86
C3orf58	0.6341	12.145	51
C4A	0.034834	6.19348	100
C4B	0.115481	3.33256	100
C4BPA	0.437746	14.1029	100
C4BPB	0.625415	13.6381	100
C4orf3	0.648128	12.5612	73
C4orf32	0.0166313	2.5552	61
C4orf33	0.647336	10.3021	31
C5	0.456257	14.1064	100
C5AR1	0.0607211	-5.78197	51
C5orf24	0.905029	10.4488	48
C5orf51	1.56153	-24.0607	74
C6	0.207169	7.51173	100
C6orf132	0.469852	6.06776	34
C6orf203	0.134973	9.53902	100
C6orf47	0.848327	11.7344	68
C6orf89	0.927801	1.08179	56
C7	1.04214	8.2185	100
C7orf26	1.2806	5.33014	68
C7orf50	0.0519885	-7.01625	100
C8A	0.636313	13.4484	100
C8B	0.450864	13.6517	100
C8G	0.653665	14.7479	100
C8orf33	0.235819	-4.48749	69
C8orf82	0.481745	14.4442	100
C9	0.73964	14.1501	100
C9orf142	0.524268	14.4155	100
C9orf64	0.376382	11.4864	100
C9orf78	0.807205	13.0764	83
CA1	0.687357	9.21431	100
CA12	0.460648	7.94419	100
CA13	0.229245	7.10349	81
CA2	0.440858	-0.450438	100
CA3	1.01204	10.7918	54
CA4	0.424507	10.3893	100
CA9	0.461908	3.05666	47
CAAP1	0.692813	7.12065	66
CAB39	0.21502	-4.87134	100
CAB39L	0.658486	14.2114	100
CACFD1	1.11303	4.23862	40
CACNA2D1	0.958165	6.38781	100
CACTIN	0.611266	11.0607	45
CACUL1	0.954258	8.15144	45
CACYBP	0.533561	14.2821	100
CAD	0.391953	14.1108	100
CADM1	0.209442	-1.20261	92
CADM3	0.91565	13.0014	100
CADM4	0.886131	7.65228	31
CADPS	1.33299	8.56266	53
CALB2	0.323945	-1.68837	100
CALCOCO1	0.821382	12.5972	93
CALCOCO2	0.000133049	-26.4959	100
CALD1	0.914174	-4.6445	100
CALM2	0.857265	11.699	100
CALML4	0.186574	4.14987	95
CALR	0.785392	13.586	100
CALU	0.893263	13.9855	100
CAMK1	0.852595	12.2694	100
CAMK1D	0.769259	9.80403	100
CAMK2D	0.559959	14.1715	100
CAMK2G	0.767339	10.9051	100
CAMKK2	0.0493796	5.5731	97
CAMP	0.49302	4.85226	100
CAMSAP3	0.542681	14.5129	100
CAND1	0.647992	12.0226	100
CAND2	1.0344	11.9144	77
CANT1	0.825632	13.0676	100
CANX	0.903249	12.6718	100
CAP1	0.692922	11.0627	100
CAP2	2.34708	-13.8879	100
CAPG	0.368961	8.72192	100
CAPN1	0.165457	9.61655	100
CAPN15	0.283773	4.53918	49
CAPN2	0.678073	13.9242	100
CAPN5	0.499915	8.41391	100
CAPN6	1.50918	5.19166	41
CAPN7	0.0792141	7.56825	100
CAPN9	0.831221	3.23981	58
CAPNS1	0.704234	14.4846	100
CAPRIN1	0.587114	10.3432	100
CAPS	0.918875	11.9115	57
CAPZA1	0.540999	11.271	100
CAPZA2	0.603936	13.2813	100
CAPZB	0.602993	7.94921	100
CARD16	0.0552524	9.20509	85
CARD19	0.46982	13.9138	94
CARHSP1	0.937686	13.6792	100
CARM1	0.799235	12.2471	100
CARMIL1	0.551241	13.9377	100
CARNMT1	0.957053	12.169	55
CARS	1.10885	11.2222	100
CARS2	0.70685	9.41526	100
CASC3	0.520381	-20.1064	67
CASC4	0.86258	12.5899	93
CASD1	0.692644	9.08607	39
CASK	0.839981	8.30403	100
CASKIN2	1.27362	9.72719	48
CASP1	0.945239	4.73823	100
CASP10	0.648962	14.3252	100
CASP2	0.901929	13.4113	91
CASP3	0.195813	2.95045	100
CASP4	0.947786	12.2793	70
CASP6	0.786278	13.0689	100
CASP7	0.668286	12.7317	100
CASP8	0.0592862	1.46804	96
CASP9	1.10347	8.13353	36
CASQ2	0.555184	6.5558	77
CAST	0.678383	11.5295	100
CAT	0.559569	8.80088	100
CAV1	1.11456	0.207548	100
CAV2	0.564951	-1.01454	87
CBFB	1.08609	9.5188	100
CBL	0.117085	0.530233	100
CBLB	0.833712	-9.80441	52
CBLL1	0.630364	11.2381	44
CBR1	0.148972	3.4881	100
CBR3	0.488153	14.4212	100
CBR4	0.602162	9.93487	100
CBWD1	0.916662	8.59118	79
CBX1	0.717242	14.5191	100
CBX3	0.914517	13.9076	100
CBX5	1.01138	13.0979	100
CBX8	0.512171	5.93639	86
CC2D1A	0.542175	-1.7558	100
CC2D1B	0.421837	14.3624	100
CCAR1	0.567523	11.2698	100
CCAR2	0.709729	14.2325	100
CCDC115	0.87426	3.28968	60
CCDC12	0.436454	-0.0752156	81
CCDC124	0.630051	12.2399	100
CCDC127	0.0698813	-2.70359	76
CCDC134	0.431521	12.8755	86
CCDC186	0.305689	7.75374	83
CCDC22	0.55534	12.3767	100
CCDC25	0.0937549	9.27922	100
CCDC28A	0.804034	13.1511	71
CCDC43	0.278183	9.11641	94
CCDC47	1.04071	0.393109	100
CCDC50	0.790866	7.20349	100
CCDC51	0.703159	9.7533	100
CCDC58	0.135635	10.7781	100
CCDC6	1.01938	2.11677	100
CCDC61	1.67772	-8.65208	43
CCDC69	0.0979944	0.807417	35
CCDC80	0.485996	12.9181	61
CCDC86	0.47668	7.56405	100
CCDC88B	0.507266	6.98928	42
CCDC9	0.210427	1.32144	100
CCDC90B	0.15465	-2.17541	88
CCDC91	0.402406	14.1915	96
CCDC93	0.941762	10.5605	100
CCDC94	0.987728	10.1579	81
CCDC97	3.44203	-1.70021	39
CCL15	0.685356	5.73594	37
CCL21	0.310148	-5.33504	100
CCL24	0.178321	8.70545	66
CCM2	0.418339	5.76299	49
CCNB1	1.00671	1.06997	36
CCNH	1.23894	-0.733483	49
CCNK	0.932927	8.98323	100
CCNL1	1.04298	4.45316	30
CCNT1	1.11403	9.89665	84
CCNY	0.77754	-22.825	66
CCNYL1	0.0363192	6.57612	42
CCS	1.13824	11.0012	100
CCT2	0.667739	14.1049	100
CCT3	0.61555	6.57267	100
CCT4	1.02702	9.06874	100
CCT5	0.625826	13.6061	100
CCT6A	0.557649	12.439	100
CCT7	0.905766	11.8388	100
CCT8	0.814638	12.2805	100
CCZ1	0.297246	1.28589	100
CD109	0.942065	9.94791	100
CD14	0.322507	0.338169	100
CD151	0.838005	12.6867	100
CD163	0.483526	-5.72154	100
CD163L1	0.784229	13.0765	90
CD164	0.916793	11.3224	62
CD177	0.701893	13.8404	100
CD180	0.724057	11.9565	55
CD2	0.904025	9.68033	75
CD209	0.134014	6.35453	92
CD248	0.50113	14.4038	100
CD276	0.982244	11.6699	100
CD2AP	0.747178	14.337	100
CD2BP2	0.560873	5.3683	100
CD300A	1.03249	9.73827	40
CD34	1.07059	11.0929	100
CD36	1.39903	-20.1387	100
CD38	0.524779	10.5615	100
CD3EAP	0.777272	11.1381	93
CD4	0.379485	12.1313	65
CD40	1.26939	9.14503	41
CD44	1.01051	0.752374	100
CD46	0.495716	12.1504	100
CD47	0.71998	12.8599	100
CD48	0.653291	13.7817	95
CD5	0.324633	-12.1891	69
CD53	0.0452472	8.59918	83
CD55	1.05282	11.8419	100
CD58	0.172701	2.1636	68
CD59	1.11697	10.6103	100
CD5L	0.532583	14.425	100
CD63	0.618736	9.28528	100
CD68	0.0196517	3.05639	36
CD74	1.44898	1.63572	100
CD81	1.13717	6.16723	100
CD82	0.88469	13.5355	95
CD8A	1.36584	8.38784	42
CD9	0.816258	13.5192	100
CD93	0.525397	13.6145	83
CD99	0.482041	14.1195	100
CD99L2	0.443361	-13.2234	81
CDA	0.512805	14.3194	96
CDC123	0.356344	5.62938	78
CDC16	0.406975	13.879	100
CDC23	0.553717	14.235	95
CDC26	0.686896	11.3979	42
CDC27	0.540699	-26.9543	100
CDC37	0.132453	4.02606	100
CDC37L1	0.754378	10.991	52
CDC40	0.100679	6.74887	100
CDC42	0.72416	14.6653	100
CDC42BPA	0.939245	12.6835	95
CDC42BPB	1.56384	3.4485	100
CDC42BPG	0.123143	-3.23956	51
CDC42EP1	0.966158	10.4609	97
CDC42EP4	0.964141	11.2995	100
CDC42EP5	0.153202	5.85555	83
CDC42SE1	1.26186	8.98656	52
CDC42SE2	0.988328	10.2622	57
CDC5L	1.04005	11.3038	100
CDC73	0.461884	9.6766	100
CDCP1	0.118527	-5.21373	82
CDH1	0.0415021	5.95771	100
CDH11	1.02413	10.9422	100
CDH13	0.168473	9.57505	100
CDH17	0.528019	8.26101	100
CDH19	1.14754	9.98966	66
CDH2	0.951575	11.5226	60
CDH5	0.784879	5.09166	42
CDHR5	0.154927	-3.75362	93
CDIPT	0.489392	7.87974	100
CDK1	0.434528	9.39319	100
CDK11B	0.778679	6.59086	100
CDK12	0.473769	7.66358	64
CDK13	1.52924	7.25524	78
CDK18	1.51286	-10.9406	34
CDK2	0.0937948	-5.20994	83
CDK4	0.915244	13.0771	87
CDK5	0.082575	-1.96669	100
CDK5RAP3	0.208567	9.0259	100
CDK6	0.21362	1.07732	96
CDK7	0.593139	6.07776	67
CDK9	0.228738	7.31877	100
CDKAL1	0.415226	2.26327	79
CDKN1B	0.283743	8.15952	88
CDKN2AIP	0.682341	0.10481	100
CDKN2AIPNL	0.887326	-2.33717	49
CDKN2C	1.02617	11.5456	89
CDS1	1.2574	-0.748178	72
CDS2	0.619197	13.9416	100
CDV3	0.549482	12.59	100
CDX1	0.525513	12.192	52
CDX2	0.106632	7.46298	90
CDYL	0.809744	10.7252	47
CEACAM1	0.682476	12.3468	100
CEACAM5	1.00629	11.4533	100
CEACAM6	0.179009	9.88121	90
CEACAM7	0.527949	4.5115	100
CEACAM8	0.352803	5.96435	55
CEBPB	0.875363	11.0762	70
CEBPG	1.56937	-20.4882	38
CEBPZ	0.471378	7.00319	100
CELA2A	0.770187	7.27783	85
CELA3A	1.01658	2.16073	89
CELA3B	1.18625	4.85869	68
CELF1	0.569009	12.0498	100
CELF2	0.817539	14.5065	100
CEMIP	1.2928	3.833	36
CENPB	0.741406	13.8214	85
CENPC	0.114646	1.31269	62
CENPV	1.02654	11.9842	100
CENPX	0.786368	11.0928	53
CEP170	0.2264	8.9625	100
CEP170B	0.700189	12.9534	93
CEP41	0.106635	8.1605	81
CEP44	0.820247	-22.1458	42
CEPT1	0.701229	-9.21246	100
CERS2	0.463878	4.40263	82
CERS6	0.687355	12.1872	100
CES1	1.23997	5.79427	100
CES2	0.48304	13.8033	100
CES3	0.481159	14.4017	100
CETN2	0.802705	13.7292	100
CFAP20	0.926898	-5.35545	94
CFAP36	4.86657	-10.0824	36
CFB	0.595656	14.0139	100
CFD	0.382586	12.4604	100
CFDP1	0.0169424	5.4907	82
CFH	0.109199	6.7716	100
CFHR1	0.120826	6.95193	100
CFHR2	0.922866	12.5946	72
CFHR3	0.857702	10.5342	82
CFHR5	0.188614	5.12744	100
CFI	0.544624	14.5359	100
CFL1	0.453713	8.22021	100
CFL2	0.835992	4.75973	100
CFP	0.220768	3.27978	100
CGGBP1	1.01192	10.1821	100
CGN	0.494302	9.796	100
CGREF1	1.21623	-9.94109	53
CHAMP1	0.452588	5.77101	100
CHCHD1	0.74813	1.95956	40
CHCHD10	0.288371	-15.4855	100
CHCHD2	1.26551	1.53623	100
CHCHD3	0.125327	5.57381	100
CHCHD4	0.566027	11.7917	93
CHCHD6	0.906379	-4.91972	100
CHCHD7	0.729058	11.1357	51
CHD1	0.810741	-4.15996	61
CHD1L	0.126138	7.50274	90
CHD2	0.353643	-0.214608	82
CHD3	0.850845	9.95313	98
CHD4	0.686139	14.384	100
CHD8	0.246818	8.21945	51
CHDH	0.517359	9.25852	100
CHEK2	0.692273	12.3215	71
CHERP	0.695367	10.37	100
CHGA	0.787193	12.3783	100
CHGB	0.608996	11.571	52
CHI3L1	0.696507	11.863	64
CHID1	0.737498	13.3077	100
CHKB	0.398808	7.02144	92
CHL1	0.706353	14.2526	100
CHM	0.580742	12.747	62
CHMP1A	0.733787	12.8764	100
CHMP1B	0.156683	-8.29659	100
CHMP2A	0.8279	8.52328	100
CHMP2B	0.121558	7.83236	100
CHMP3	0.486455	11.4326	100
CHMP4A	0.181208	1.75317	100
CHMP4B	0.437266	10.9425	100
CHMP4C	0.680254	1.80686	52
CHMP5	0.266671	10.5893	100
CHMP6	0.568608	13.9406	100
CHMP7	0.0656016	-2.98824	100
CHORDC1	0.387474	1.99426	100
CHP1	0.535157	14.4092	100
CHP2	0.866463	11.7676	71
CHPF2	0.0705398	1.69003	53
CHRAC1	0.506301	6.04954	74
CHRDL1	1.7862	2.4964	37
CHST5	1.39899	6.45704	55
CHTF18	0.510884	10.9926	48
CHTOP	0.759432	13.9101	100
CHUK	0.00049695	3.51155	100
CIAO1	0.691787	10.7763	100
CIAPIN1	0.933071	13.6498	100
CIB1	0.535806	14.3874	100
CILP	0.630638	-3.10747	100
CIR1	2.31173	-0.324674	37
CIRBP	0.352325	-3.36286	100
CISD1	0.367105	14.0886	100
CISD2	0.666564	14.1747	100
CISD3	0.0540457	8.48792	100
CIZ1	0.883546	12.1281	70
CKAP4	0.680338	7.68593	100
CKAP5	1.10938	7.08066	100
CKB	0.777573	-8.26591	100
CKM	1.36918	5.90878	31
CKMT1A	0.414959	-4.32987	100
CKMT2	0.619438	12.0033	84
CLASP1	0.766504	12.4949	100
CLASP2	0.637505	8.85514	100
CLASRP	1.38068	4.03735	48
CLC	1.28741	2.29261	100
CLCA1	0.731039	5.0905	100
CLCA4	0.787871	13.8377	93
CLCC1	0.0297157	-10.3483	100
CLCN3	0.542695	11.7356	83
CLCN7	1.25361	7.76118	53
CLDN3	0.0817313	8.29043	100
CLDN4	0.625264	13.7947	81
CLDN7	0.528724	14.2056	100
CLEC11A	0.179609	8.59678	48
CLEC16A	0.656902	12.6937	60
CLEC3B	0.547617	9.88996	100
CLGN	1.30817	7.92511	52
CLIC1	0.808791	12.5087	100
CLIC2	0.617634	9.6838	100
CLIC4	0.809769	13.8511	100
CLIC5	0.266812	-14.3776	100
CLIC6	0.248144	0.729171	93
CLINT1	0.827386	11.3412	100
CLIP1	0.957494	12.0776	100
CLIP2	0.353924	14.4806	100
CLMN	0.187233	9.57001	100
CLN5	0.468905	14.3004	100
CLN6	0.651982	12.3294	56
CLNS1A	0.13455	-19.3565	94
CLP 1	1.26621	9.08298	83
CLPB	0.724284	13.5389	100
CLPP	0.441154	14.31	100
CLPTM1	0.830939	10.7798	100
CLPTM1L	0.437561	14.2617	100
CLPX	0.523344	0.942943	100
CLRN3	0.830766	12.6043	81
CLSTN1	0.165081	-4.03798	79
CLTA	0.138165	8.05075	100
CLTB	0.389476	13.6027	100
CLTC	0.697437	13.1006	100
CLTCL1	0.731713	13.6035	88
CLU	0.587511	12.2527	100
CLUH	0.111452	5.26353	100
CLYBL	0.454025	14.2602	100
CMA1	0.798096	11.1263	100
CMAS	0.863526	12.5585	100
CMBL	1.0757	7.65083	100
CMC1	0.964159	11.2441	95
CMC2	0.420296	-7.07475	100
CMC4	0.472682	5.9564	58
CMIP	0.745115	7.65049	71
CMPK1	0.389579	7.93859	100
CMPK2	0.503134	7.85054	93
CMSS1	0.595067	12.5051	71
CMTM4	0.546316	11.0953	91
CMTM6	0.229404	9.68029	55
CMTR1	0.45353	-14.7184	100
CNBP	0.809059	-21.0435	100
CNDP2	0.0718	9.43994	100
CNIH4	0.726247	12.3338	100
CNN1	2.14143	-27.3658	100
CNN2	0.459059	13.1298	100
CNN3	0.741405	11.8912	100
CNNM3	0.131885	-11.0643	83
CNNM4	0.483591	14.3571	100
CNOT1	0.182642	8.94825	100
CNOT10	0.784564	13.8034	100
CNOT11	0.972391	4.33811	100
CNOT2	0.050182	6.37899	90
CNOT3	0.602415	13.4606	100
CNOT4	0.873154	-2.7786	69
CNOT7	0.209732	3.9579	64
CNOT9	0.476366	14.2046	100
CNP	0.975685	13.4942	100
CNPY2	0.793478	13.673	100
CNPY3	0.784795	13.8973	100
CNPY4	4.72326	-7.64732	71
CNRIP1	0.0575946	0.218298	80
CNTN1	1.34713	7.69175	58
COA3	1.06643	12.3017	100
COA4	0.387751	4.49013	98
COA5	0.77893	9.73311	93
COA6	0.700264	13.6999	100
COA7	0.584068	13.8326	100
COASY	0.668416	14.176	100
COBL	0.00543991	0.532617	56
COBLL1	0.747994	-19.9169	94
COG1	0.569753	14.0364	100
COG2	0.296345	10.2306	100
COG3	0.871946	9.5988	100
COG4	0.674687	14.4705	100
COG5	0.82879	13.262	100
COG6	0.58432	11.2726	100
COG7	1.11494	12.4342	100
COG8	0.915805	12.6472	100
COIL	0.756823	-12.6144	100
COL10A1	0.801412	13.4627	95
COL11A1	0.842158	3.99162	95
COL12A1	0.583597	14.2719	100
COL14A1	0.430812	0.757282	100
COL15A1	0.7098	13.5072	100
COL16A1	0.531815	13.3727	100
COL17A1	0.659247	13.0871	70
COL18A1	0.865964	14.0788	100
COL1A1	0.816278	9.2365	100
COL1A2	0.744087	9.70666	100
COL21A1	0.65828	13.4341	98
COL28A1	1.12206	11.1979	100
COL2A1	0.79169	11.7322	61
COL3A1	0.675297	5.73093	100
COL4A1	0.572843	13.9704	100
COL4A2	0.854658	12.5733	100
COL4A3BP	0.394951	13.0625	100
COL4A5	2.38891	-9.91201	35
COL5A1	0.984137	11.9293	100
COL5A2	0.593047	14.2126	100
COL5A3	0.513574	7.48774	100
COL6A1	0.665452	9.95748	100
COL6A2	0.797105	9.64347	100
COL6A3	0.732008	7.53742	100
COL7A1	0.0152917	-2.65731	88
COL8A1	0.544865	14.3616	98
COLEC12	0.828486	13.8638	92
COLGALT1	0.496592	8.55127	100
COMMD1	0.0931297	-24.027	100
COMMD10	0.129387	1.5095	76
COMMD2	0.641499	1.81391	65
COMMD3	0.739588	-6.63708	78
COMMD3-BMI1	0.778454	12.2745	67
COMMD4	0.760435	14.0707	100
COMMD5	0.824992	7.48786	91
COMMD6	0.184868	6.66651	100
COMMD7	0.580733	9.37283	93
COMMD8	0.390755	14.0741	100
COMMD9	0.388884	-7.6448	100
COMP	0.0256419	5.11255	93
COMT	0.75916	13.9319	100
COMTD1	0.871456	12.5456	100
COPA	0.71893	14.0055	100
COPB1	1.00222	13.2514	100
COPB2	0.691314	14.8004	100
COPE	0.647709	12.6464	100
COPG1	0.575684	14.712	100
COPG2	1.22877	4.91904	100
COPS2	0.803067	13.9032	100
COPS3	0.857001	13.4832	100
COPS4	0.798744	14.237	100
COPS5	0.796032	14.3675	100
COPS6	0.250658	5.87283	100
COPS7A	0.844072	11.8375	100
COPS7B	0.66085	13.5892	100
COPS8	0.621881	9.46793	100
COPZ1	0.906704	9.77341	100
COPZ2	0.121964	6.89409	100
COQ10B	0.34594	3.35457	82
COQ3	0.698299	14.6108	100
COQ5	0.713944	10.612	100
COQ6	0.504643	13.7172	100
COQ7	0.375451	13.9991	100
COQ8A	0.741759	11.0476	100
COQ8B	0.280692	8.06847	95
COQ9	0.64658	14.6088	100
CORO1A	0.794609	5.77574	100
CORO1B	0.56082	7.62223	100
CORO1C	1.14203	7.45724	100
CORO2A	0.560054	12.4388	100
CORO2B	1.10422	10.3256	60
CORO7-PAM16	0.636269	13.736	100
COTL1	0.70851	4.51972	100
COX11	0.576582	12.9137	66
COX14	0.603862	10.6423	33
COX15	0.571177	11.3724	100
COX17	0.833199	13.7346	100
COX18	0.528603	10.0746	38
COX19	0.569972	10.8829	68
COX20	0.127476	6.43098	95
COX4I1	0.657725	14.261	100
COX5A	0.757456	14.216	100
COX5B	0.655982	13.5274	100
COX6A1	0.857396	12.9609	100
COX6B1	0.908227	13.2133	100
COX6C	0.749215	14.0372	100
COX7A1	0.255872	8.46716	37
COX7A2	0.736263	13.5825	100
COX7A2L	0.725516	14.2076	100
COX7B	0.59948	13.041	100
COX7C	0.394182	11.7269	100
COX8A	0.957237	11.1362	100
CP	0.884977	12.4566	100
CPA1	1.40423	0.390607	44
CPA3	1.02327	10.0236	100
CPA6	1.05246	8.57137	45
CPB1	1.05687	-1.12659	74
CPB2	0.516168	13.1596	100
CPD	0.166643	10.6873	100
CPM	0.786752	12.2366	100
CPN1	1.06403	11.7266	92
CPN2	0.464883	13.1944	100
CPNE1	0.660597	-14.2065	100
CPNE2	0.0624123	-4.07157	97
CPNE3	0.685677	11.7605	100
CPO	1.56365	7.85267	62
CPOX	0.509434	14.5429	100
CPPED1	0.594695	13.8688	100
CPQ	0.960661	1.81521	70
CPS1	0.467475	-6.13355	100
CPSF1	0.640841	8.65842	100
CPSF2	0.496762	-57.495	100
CPSF3	0.187007	3.61466	100
CPSF4	1.11374	-33.2896	100
CPSF6	0.488626	13.8418	100
CPSF7	1.01675	13.3411	100
CPT1A	0.637454	13.9699	100
CPT2	0.56899	14.2774	100
CPTP	0.0370013	2.51313	32
CPVL	5.92167	-17.2815	100
CPXM2	0.787402	11.1037	53
CPZ	0.321025	7.14032	34
CR2	0.355154	2.03149	61
CRABP1	0.570275	9.32562	77
CRABP2	0.986036	11.6724	65
CRACR2A	0.623074	13.8099	85
CRADD	1.10958	11.9922	100
CRAT	0.820814	14.4558	100
CRBN	0.264763	9.71716	100
CRCP	1.6634	4.3735	35
CREB1	0.202305	-2.94416	100
CREBBP	1.37097	8.29854	52
CREG1	1.05512	9.41586	39
CRELD1	0.728502	12.8535	100
CRELD2	0.658178	9.87378	100
CRIP1	0.517202	14.3062	100
CRIP2	0.660467	13.4132	100
CRISP3	0.195232	5.09376	75
CRISPLD2	0.752089	11.0143	40
CRK	0.56839	14.1813	100
CRKL	0.278663	8.39013	100
CRLF3	0.65377	14.2583	100
CRMP1	0.784933	13.8673	100
CRNKL1	0.45346	13.0525	100
CROCC	0.476275	12.7244	95
CROT	0.12882	5.16067	95
CRP	0.820819	11.2448	96
CRTAC1	0.462155	11.9893	50
CRTAP	0.815817	14.1909	100
CRTC1	1.66017	2.09452	55
CRTC3	0.660452	12.1707	54
CRYAB	1.20563	2.14518	100
CRYL1	0.4357	11.2207	100
CRYM	0.545231	13.9256	86
CRYZ	0.648385	11.0776	100
CRYZL1	0.412995	13.7306	100
CS	0.354628	4.6404	100
CSDE1	0.799045	6.22755	100
CSE1L	0.918368	10.6004	100
CSF1R	0.838526	11.6726	58
CSK	0.554869	3.96523	100
CSNK1A1	0.50899	14.2113	100
CSNK1D	0.479431	2.62836	65
CSNK1G3	0.576741	-1.7233	52
CSNK2A1	0.725076	-23.633	100
CSNK2A2	0.64518	11.3665	100
CSNK2B	0.850966	10.4111	100
CSPG4	1.11797	4.82488	100
CSRP1	1.12169	-12.7101	100
CSRP2	0.752332	12.4135	100
CSRP3	0.582752	13.9081	89
CST3	0.902006	12.4176	100
CSTA	0.659644	-7.37651	35
CSTB	0.701935	11.2497	100
CSTF1	0.085465	-1.37834	100
CSTF2	0.28632	7.25364	100
CSTF2T	0.60973	-4.19531	82
CSTF3	0.14831	9.4962	100
CTBP1	2.13727	-4.17782	100
CTBP2	0.559973	14.2256	100
CTBS	0.600942	-3.21339	91
CTCF	0.758773	6.8228	100
CTDP1	1.07974	6.07297	90
CTDSP1	0.778995	0.977594	72
CTDSPL2	0.133938	-13.261	80
CTH	0.413608	2.56168	96
CTHRC1	0.515666	10.7116	100
CTIF	0.493147	12.5455	62
CTNNA1	0.529527	14.2084	100
CTNNAL1	1.53055	5.34896	32
CTNNB1	0.635355	14.4527	100
CTNNBL1	0.9571	13.1828	100
CTNND1	0.130386	7.27994	100
CTPS1	0.842925	13.1288	100
CTPS2	0.345287	14.0126	100
CTR9	0.497075	14.4754	100
CTRC	0.872005	9.7134	74
CTSA	0.641513	14.3699	100
CTSB	0.215515	11.114	100
CTSC	0.761835	14.064	100
CTSD	7.02089	-27.3862	100
CTSE	1.03355	10.3015	40
CTSG	0.519334	14.061	100
CTSH	1.23072	8.40881	100
CTSK	7.48282	-30.6373	78
CTSL	0.40293	13.0674	100
CTSS	0.755925	14.3866	100
CTSZ	0.113399	10.0051	100
CTTN	1.13005	9.95646	100
CTTNBP2NL	0.797386	9.34348	100
CTU2	1.06113	8.56883	88
CUEDC1	0.435075	11.5951	49
CUL1	0.679886	14.3618	100
CUL2	0.877017	12.4246	100
CUL3	0.788843	8.88966	100
CUL4A	0.440221	14.2719	100
CUL4B	0.840508	12.9829	100
CUL5	0.722741	14.6508	100
CUTA	0.641048	14.3689	100
CUTC	0.889564	13.2674	82
CUX1	0.547835	14.5324	100
CWC15	0.1501	9.40572	100
CWC22	0.0913749	-6.98239	87
CWC25	0.573502	13.3225	78
CWC27	0.0802889	7.4883	78
CWF19L1	0.698524	12.3975	100
CXADR	0.700431	13.6994	100
CXCL12	0.539757	13.9542	92
CXCL14	1.51464	6.46727	72
CXXC1	1.43237	2.65096	59
CXorf38	0.155043	4.37391	97
CXorf56	0.0797163	-8.84514	88
CYB5A	0.151107	8.407	100
CYB5B	0.885743	10.9021	100
CYB5R1	0.521933	10.8032	100
CYB5R2	1.24184	8.91747	96
CYB5R3	0.614155	11.5443	100
CYB5R4	0.284143	5.90697	44
CYBA	0.765703	11.5918	100
CYBB	0.552863	14.1114	100
CYBRD1	0.504326	13.7969	93
CYC1	0.418377	9.46873	100
CYCS	1.40028	-4.82241	100
CYFIP1	0.511687	12.3263	100
CYFIP2	0.0593739	1.61145	95
CYGB	0.169308	6.38091	100
CYHR1	0.91142	-5.51826	46
CYLD	0.454714	12.281	65
CYP20A1	0.0683725	5.99325	100
CYP27A1	0.375304	-2.69118	100
CYP2S1	0.357139	11.6719	100
CYP2W1	0.30186	6.3928	35
CYP3A5	0.901956	8.11543	32
CYP4F11	0.649786	12.0581	53
CYP4F12	0.724478	11.514	73
CYP4F3	0.541929	-1.53022	48
CYP51A1	0.616951	10.0175	100
CYP7B1	0.825078	9.89172	86
CYR61	0.127066	9.26985	72
CYSTM1	1.52104	5.67949	33
CYTH1	1.08502	7.95722	46
CYTH2	1.3333	5.91991	31
D2HGDH	0.988	11.466	97
DAAM1	0.508777	3.6673	58
DAB2	0.260806	-12.6753	100
DAB2IP	1.32558	9.26014	94
DACH1	0.636031	10.8804	48
DAD1	0.45219	14.3663	100
DAG1	0.957871	12.47	100
DAGLB	0.967442	-54.0944	69
DAP	0.502129	14.3803	100
DAP3	0.750307	14.112	100
DAPK2	1.01367	12.8013	100
DAPK3	0.0213202	7.30111	100
DARS	0.474658	13.2804	100
DARS2	0.694228	12.4196	100
DAXX	0.111416	-10.7483	74
DAZAP1	0.630159	14.0962	100
DAZAP2	0.952442	12.2022	65
DBI	0.697787	9.25298	100
DBN1	0.67331	12.8055	100
DBNL	0.929917	9.61481	100
DBR1	0.0911944	8.23273	100
DBT	0.220826	3.36046	100
DCAF1	0.122578	2.96944	94
DCAF11	0.0281728	-1.73824	62
DCAF13	0.457437	8.80496	100
DCAF7	0.293628	-27.6511	100
DCAF8	0.629231	14.5278	100
DCAKD	0.611745	-51.2787	96
DCK	0.196108	5.76791	93
DCLK1	0.512612	13.8556	100
DCN	0.699797	8.36584	100
DCP1A	0.21738	-12.5078	100
DCP1B	0.553524	13.6172	84
DCPS	0.610866	13.7345	100
DCTD	0.264772	-10.09	100
DCTN1	0.724202	13.988	100
DCTN2	0.680713	9.40645	100
DCTN3	0.603749	12.2143	100
DCTN4	0.641238	12.7798	100
DCTN5	0.861938	13.5966	100
DCTN6	1.37834	7.76919	100
DCTPP1	0.356726	7.93739	100
DCUN1D1	0.0519167	4.20264	100
DCUN1D3	1.14658	10.2704	77
DCUN1D5	0.306514	-1.01071	64
DCXR	1.15145	10.9657	100
DDA1	0.694755	10.8146	63
DDAH1	0.711711	10.3541	100
DDAH2	1.05537	11.0347	100
DDB1	1.0221	12.439	100
DDB2	0.618646	13.2677	100
DDC	0.581524	13.9249	96
DDHD2	1.30304	7.46843	71
DDI2	0.967781	2.06141	100
DDOST	0.613319	11.8559	100
DDR1	0.824366	12.5737	85
DDRGK1	0.837119	12.9301	100
DDT	0.381088	0.296234	100
DDX1	0.0771497	7.95596	100
DDX10	2.14454	-35.7907	88
DDX17	0.573089	13.4295	100
DDX18	0.670959	12.4233	100
DDX19A	0.764351	14.0583	100
DDX19B	0.605414	9.26409	100
DDX20	0.199119	-5.09762	95
DDX21	0.443631	10.2185	100
DDX23	0.490043	-15.6551	100
DDX24	0.470794	11.8911	100
DDX27	0.72081	14.1507	100
DDX28	0.100162	6.95848	100
DDX31	0.795458	12.5976	57
DDX39A	0.750047	5.7368	100
DDX39B	0.953838	13.8774	100
DDX3X	0.767377	14.1369	100
DDX3Y	1.88698	-8.19309	77
DDX41	0.40977	14.1258	93
DDX42	0.149318	-15.1915	100
DDX46	0.575368	14.6763	100
DDX47	1.26921	6.26431	100
DDX49	0.025328	7.11133	83
DDX5	0.76689	13.2041	100
DDX50	0.690932	-4.42229	100
DDX51	0.822769	7.34809	87
DDX52	0.560667	12.8216	100
DDX54	0.253815	-3.92344	100
DDX55	1.33203	5.90458	72
DDX56	0.621811	14.3026	100
DDX58	0.492762	13.067	100
DDX6	0.749294	7.22232	100
DDX60	0.825448	13.966	100
DECR1	0.46438	11.1214	100
DECR2	0.50788	13.4398	100
DEF6	0.336841	-22.1264	100
DEFA1B	0.23822	8.25441	83
DEFA3	1.02414	12.2238	97
DEFA4	0.265921	-6.66992	100
DEFA5	0.439228	13.7301	92
DEFA6	0.898371	9.22177	100
DEGS1	2.38282	0.233619	30
DEK	0.998761	12.6418	100
DENND1A	0.263717	5.48716	48
DENND2D	0.166402	1.70661	100
DENND3	0.75784	10.1874	74
DENND4C	0.198881	7.96171	100
DENND6A	0.693448	5.72957	51
DENR	1.11931	4.1116	100
DEPTOR	0.692997	13.8277	94
DERA	0.926476	13.9692	100
DERL1	0.549537	10.6709	100
DERL3	0.729732	12.2145	54
DES	1.92859	-28.4185	100
DFFA	0.860128	13.6008	100
DFFB	0.596523	12.3804	58
DFNA5	0.287944	7.31616	77
DGAT1	0.555112	1.13685	93
DGKA	0.215329	-2.67108	100
DGKQ	1.44529	7.64279	32
DGUOK	1.18251	-13.3768	81
DHCR24	0.376141	10.8434	100
DHCR7	0.165374	4.0361	100
DHFR	0.150045	8.24821	91
DHODH	5.79599	-15.0232	100
DHPS	0.244853	5.57423	79
DHRS1	0.386517	14.283	100
DHRS11	0.927494	10.2762	100
DHRS3	0.988124	2.54579	89
DHRS4	0.343361	8.81126	95
DHRS4L2	0.909173	4.69235	54
DHRS7	0.496349	-37.4086	100
DHRS7B	0.975099	13.1371	100
DHRS9	1.23233	3.53819	97
DHTKD1	1.03482	12.601	87
DHX15	1.03813	10.353	100
DHX16	0.845763	2.50339	100
DHX29	0.181328	2.61852	100
DHX30	0.0778349	9.94038	100
DHX32	0.664075	11.5592	72
DHX36	0.543503	14.4819	100
DHX37	0.324646	0.373732	85
DHX38	0.819898	13.9432	100
DHX57	0.733541	9.50357	53
DHX8	1.21611	4.03769	84
DHX9	0.704514	14.4117	100
DIABLO	0.236205	9.19378	100
DIAPH1	1.15898	8.92454	100
DIAPH2	0.23138	-4.86089	100
DICER1	0.380863	13.5941	89
DIDO1	0.491531	14.0267	100
DIEXF	0.8937	10.8095	69
DIMT1	0.0487421	6.12955	100
DIP2A	0.918007	11.8346	67
DIP2B	1.72685	-51.3621	100
DIP2C	0.897636	9.51232	76
DIS3	0.400262	1.59743	100
DIS3L2	1.07081	9.43202	100
DKC1	0.768378	14.377	100
DLAT	5.51315	-12.1192	100
DLD	1.27687	7.1717	100
DLG1	0.613806	11.4047	100
DLG3	0.872491	8.66918	90
DLG4	1.03246	10.3513	69
DLGAP4	0.166674	8.49885	100
DLST	0.612204	-0.334953	100
DMAP1	0.529994	2.22619	92
DMBT1	0.617493	12.2065	100
DMD	0.824949	8.26605	100
DMPK	0.568694	9.66727	76
DMTN	0.767814	8.44497	94
DNAAF5	1.11888	11.4885	100
DNAJA1	0.65259	11.8859	100
DNAJA2	0.878509	4.80302	100
DNAJA3	0.145381	-9.42153	100
DNAJA4	0.350703	7.10224	100
DNAJB1	1.34142	2.57907	100
DNAJB11	0.599301	7.55969	100
DNAJB12	0.932964	-7.14763	100
DNAJB14	1.10716	9.04033	77
DNAJB2	0.516312	0.141382	94
DNAJB4	0.640287	13.5975	100
DNAJB5	0.714117	3.45476	100
DNAJB6	0.0750145	-7.56659	100
DNAJC1	0.15081	9.94971	100
DNAJC10	0.633249	12.3917	100
DNAJC11	0.302855	-0.575271	100
DNAJC13	0.138243	-2.32603	100
DNAJC15	0.484025	9.6451	41
DNAJC16	0.572743	11.3477	41
DNAJC17	0.335447	-11.0847	100
DNAJC19	0.186077	-2.33134	100
DNAJC2	0.0491276	7.14	100
DNAJC21	0.479437	12.2924	55
DNAJC25	0.217851	5.65047	63
DNAJC3	0.392965	-4.41584	100
DNAJC30	0.314422	9.94636	64
DNAJC5	0.587882	-1.39533	100
DNAJC7	0.93648	13.3121	100
DNAJC8	0.809456	11.4399	100
DNAJC9	0.30294	8.952	100
DNASE2	0.0997421	-6.7065	100
DNM1	0.728485	13.9912	100
DNM1L	0.58686	12.8561	100
DNM2	0.84518	13.0878	100
DNM3	0.497594	-13.9409	94
DNMBP	0.156623	2.41652	95
DNMT1	0.574041	14.2019	100
DNPEP	0.684211	10.1204	100
DNPH1	0.737934	-4.63686	100
DNTTIP1	0.67758	-14.7506	100
DNTTIP2	0.0749641	5.65738	93
DOCK1	0.00403569	-1.64978	100
DOCK10	0.386874	13.7011	90
DOCK11	0.603025	14.0125	100
DOCK2	0.759111	11.7244	100
DOCK5	0.503627	-43.9825	95
DOCK6	0.905249	14.2974	100
DOCK7	0.554725	6.36298	100
DOCK8	0.781657	10.9483	90
DOCK9	0.41906	10.5812	100
DOHH	0.850734	9.76963	97
DOK1	0.710181	12.2203	100
DOK2	0.766864	12.496	86
DOK3	0.837119	11.0584	54
DOLPP1	1.00617	10.9985	71
DOPEY2	0.551985	14.3507	100
DPAGT1	0.828753	4.26771	100
DPCD	0.565204	9.38336	70
DPEP1	0.403931	14.1288	100
DPF2	0.405714	14.406	100
DPH1	0.646214	10.5993	43
DPH2	0.589604	9.90945	83
DPM1	0.142883	5.977	100
DPM3	0.393372	14.3457	100
DPP3	0.555284	11.6062	100
DPP4	0.65831	10.3087	89
DPP7	0.752629	14.0799	100
DPP9	0.425535	14.2574	100
DPT	1.03474	6.35864	100
DPY19L1	0.497589	10.6977	43
DPY30	0.245693	-0.90192	100
DPYD	0.81255	7.99333	100
DPYSL2	1.30715	7.9567	100
DPYSL3	0.770109	13.3449	100
DPYSL4	0.830943	10.765	57
DR1	0.143295	7.70441	100
DRAP1	0.0978408	2.37333	100
DRG1	1.04567	10.2372	100
DRG2	0.913135	13.0867	100
DSC2	0.461296	6.37641	100
DSCC1	0.978164	12.176	53
DSCR3	0.13118	-12.688	93
DSG2	0.247938	10.2126	100
DSN1	0.790252	6.78563	54
DSP	0.234829	6.92341	100
DST	0.639266	12.1122	100
DSTN	2.36985	-14.1216	100
DTD1	0.355027	-0.978856	77
DTNA	0.956317	11.8159	100
DTNBP1	0.766314	13.9577	95
DTWD2	0.506138	9.10433	37
DTX3L	1.02069	7.38093	100
DTYMK	0.517409	13.9679	100
DUOX2	0.271945	6.60578	73
DUS1L	1.11013	6.87885	50
DUS2	0.0496659	2.1053	72
DUS3L	0.253368	3.59266	90
DUSP12	0.586778	11.8986	53
DUSP22	0.798282	11.3189	44
DUSP23	0.534876	-33.2152	100
DUSP3	0.887244	12.465	100
DUT	0.943309	13.9032	100
DVL2	0.644437	11.1279	45
DVL3	0.798667	11.6446	49
DYM	0.331231	-14.4827	90
DYNC1H1	0.934394	9.82378	100
DYNC1I1	0.126121	2.97176	53
DYNC1I2	0.704061	0.298316	100
DYNC1LI1	0.541856	13.0532	100
DYNC1LI2	0.360203	4.71187	100
DYNLL1	0.608197	12.9502	100
DYNLL2	0.924466	13.529	100
DYNLRB1	0.552757	-1.07538	100
DYNLT1	0.535555	14.3163	100
DYNLT3	0.637719	13.1749	69
DYRK1A	0.936839	10.43	54
DYSF	0.835816	13.6501	100
E2F4	0.280932	-29.9952	74
EAPP	0.753897	11.6121	50
EARS2	0.857321	14.0271	100
EBAG9	0.539666	12.0945	58
EBNA1BP2	1.05366	10.6679	100
EBP	1.73547	4.10281	51
ECE1	0.139264	5.34107	100
ECH1	0.395722	7.48969	100
ECHDC1	0.0898029	7.84997	100
ECHDC2	0.542755	11.2553	48
ECHDC3	0.370054	12.6409	84
ECHS1	0.539531	11.9872	100
ECI1	0.792152	11.675	100
ECI2	0.482756	11.3207	100
ECM1	0.890578	11.6836	100
ECSIT	0.675976	12.8979	100
ECT2	1.71076	2.47472	57
EDC3	1.66858	3.28019	100
EDC4	0.148603	-13.8767	100
EDEM3	0.106841	-8.0788	62
EDF1	0.185046	-11.4715	100
EEA1	1.27096	-1.06743	100
EED	0.0849195	6.2754	89
EEF1A1	0.893255	9.82134	100
EEF1A2	0.876427	13.2332	100
EEF1B2	0.576296	11.2573	100
EEF1D	0.282704	-3.03788	100
EEF1E1	0.614587	14.4011	100
EEF1G	0.429035	9.8583	100
EEF2	0.604472	8.70801	100
EEF2K	1.23791	9.20816	74
EEFSEC	0.595955	13.0734	100
EEPD1	0.83286	12.2037	100
EFEMP1	1.4199	-76.4171	100
EFEMP2	0.763865	13.368	100
EFHD1	1.34428	7.66173	39
EFHD2	0.170173	8.94178	100
EFL1	0.384056	14.3591	100
EFNA5	0.296865	0.471847	65
EFNB1	0.839529	10.1109	90
EFNB2	0.73227	14.5487	100
EFR3A	0.66249	12.9412	100
EFTUD2	0.551791	13.8061	100
EGFL7	0.58447	12.1014	56
EGFR	0.0589872	6.57716	100
EGLN1	0.635138	12.952	95
EHBP1	1.59836	2.22912	41
EHBP1L1	1.04058	12.2534	100
EHD1	0.719522	14.6174	100
EHD2	2.32832	-10.6337	100
EHD3	0.357489	7.20903	94
EHD4	0.953344	13.6913	100
EHHADH	0.501167	14.0479	100
EHMT1	0.443289	12.6866	87
EHMT2	0.411171	10.6549	42
EI24	0.147991	-32.9888	84
EIF1	0.539274	-29.6945	100
EIF1AD	0.430918	0.542789	54
EIF1AX	0.62781	-3.9587	94
EIF1AY	1.64456	-12.9397	62
EIF1B	0.437557	-1.49392	65
EIF2A	0.228201	9.81098	100
EIF2AK2	0.523934	10.7521	100
EIF2B1	0.651222	8.14982	100
EIF2B2	0.353855	-12.6026	100
EIF2B3	0.39101	14.2946	100
EIF2B4	0.522388	14.1411	100
EIF2B5	1.17604	9.38049	100
EIF2D	0.191837	-2.79142	100
EIF2S1	1.15842	10.5098	100
EIF2S2	0.328518	-10.9214	100
EIF2S3	0.306924	-29.738	100
EIF3A	0.654148	13.9586	100
EIF3B	0.955294	13.3472	100
EIF3C	0.841709	12.1224	100
EIF3D	1.1576	1.51314	100
EIF3E	0.574678	13.4383	100
EIF3F	0.867432	13.8139	100
EIF3G	0.0508408	-16.6159	100
EIF3H	0.264797	7.26379	100
EIF3I	0.448526	13.8307	100
EIF3J	0.380148	13.5321	100
EIF3K	0.674805	13.7208	100
EIF3L	0.881562	10.2096	100
EIF3M	0.764629	-14.0935	100
EIF4A1	6.81334	-23.9943	100
EIF4A2	0.363408	9.07609	100
EIF4A3	1.17637	9.79764	100
EIF4B	1.07821	11.7244	100
EIF4E	0.86057	14.0793	100
EIF4E2	1.02786	12.0913	100
EIF4E3	0.684474	11.4012	53
EIF4EBP1	0.869711	5.92526	53
EIF4EBP2	0.133286	9.25972	55
EIF4ENIF1	0.0157142	1.7832	70
EIF4G1	0.795632	10.2399	100
EIF4G2	0.944714	7.30994	100
EIF4G3	1.99596	-57.4482	93
EIF4H	0.440903	13.0339	100
EIF5	0.188264	-1.1787	100
EIF5A	0.416705	13.1103	100
EIF5B	0.718987	9.97867	100
EIF6	0.0294845	0.779187	100
ELAC2	0.0761855	4.1886	100
ELANE	1.00998	10.0589	100
ELAVL1	0.812056	14.5844	100
ELF1	0.398237	9.41071	88
ELF3	0.655277	9.25078	52
ELMO1	0.501562	14.2622	100
ELMO2	0.685255	10.7787	100
ELMO3	0.0836631	1.36879	100
ELMOD2	0.951919	-6.30899	100
ELMSAN1	0.0221451	-25.3782	72
ELN	0.773662	14.3216	100
ELOA	0.016979	-7.12659	84
ELOB	0.808882	9.90524	100
ELOC	0.697319	13.214	100
ELOF1	0.0641186	-22.7389	85
ELOVL1	0.371649	9.53419	100
ELP2	0.85077	10.5703	89
ELP3	0.738375	9.19429	96
ELP4	0.766664	9.53193	82
ELP6	0.657771	11.8076	61
EMC1	0.0903439	8.06851	100
EMC10	0.339023	-20.4175	87
EMC2	0.0950937	3.10288	100
EMC3	0.585338	6.45483	92
EMC4	0.118383	-19.6587	100
EMC6	0.534884	-6.22386	90
EMC7	0.50209	-45.8341	100
EMC8	0.862788	10.2102	100
EMD	0.440579	11.7992	100
EMG1	0.696608	14.3738	100
EMILIN1	1.01525	12.4362	100
EMILIN2	0.618838	9.85997	100
EMILIN3	1.43248	6.92654	41
EML1	0.798054	4.65422	100
EML2	0.721489	10.9321	100
EML3	0.574208	13.3458	100
EML4	0.568358	14.6265	100
ENAH	0.759584	14.4729	100
ENDOD1	0.72402	8.01185	100
ENDOG	0.616096	14.0429	100
ENG	0.761505	14.4181	95
ENGASE	0.553695	13.6466	100
ENO1	0.643569	8.97884	100
ENO2	0.877413	3.7915	100
ENO3	0.792223	9.58068	100
ENOPH1	0.0592111	-5.03665	100
ENOSF1	0.214514	6.43351	91
ENPEP	2.30731	-38.1296	50
ENPP1	0.655971	12.389	61
ENPP4	0.377188	14.0676	95
ENSA	0.854382	3.41742	100
ENTPD1	0.872679	12.4934	100
ENTPD2	0.548844	12.325	66
ENTPD5	0.64043	9.24827	100
ENY2	0.411647	3.09151	88
EOGT	0.94698	12.2697	100
EP300	0.346608	7.18101	75
EPB41	0.733699	0.287708	100
EPB41L1	0.771053	2.51413	100
EPB41L2	0.413558	12.8926	100
EPB41L3	0.89839	13.3192	100
EPB41L4B	0.0104142	3.74859	100
EPB41L5	0.00457989	4.48629	100
EPB42	1.02596	-3.79531	100
EPCAM	0.444699	12.996	100
EPHA2	0.536101	13.58	84
EPHB2	0.430502	14.3476	100
EPHB3	1.13766	8.1343	94
EPHB4	0.0180493	-22.7191	96
EPHX1	0.762745	12.9102	100
EPHX2	0.784021	-5.07131	100
EPM2A	0.937101	10.6542	88
EPM2AIP1	2.07253	5.29476	64
EPN1	0.0662117	-5.68318	100
EPN2	0.632931	12.2937	53
EPN3	1.18043	7.81319	34
EPPK1	1.04151	11.5591	100
EPRS	1.02844	7.86044	100
EPS15	0.822766	13.5952	100
EPS15L1	0.52482	8.00967	100
EPS8	0.765439	-15.3779	100
EPS8L1	0.219724	8.90182	70
EPS8L2	0.543772	6.4526	100
EPS8L3	0.539168	14.5084	100
EPSTI1	0.337934	-6.08376	55
EPX	1.22717	9.44655	100
ERAL1	0.747081	13.2345	93
ERAP1	0.750957	11.486	100
ERAP2	1.40407	4.2905	100
ERBB2	0.174125	6.60518	93
ERBB3	1.40593	9.15521	66
ERBIN	0.514138	14.4677	100
ERC1	0.572638	11.0824	100
ERCC2	0.244262	-20.8608	78
ERCC3	0.877687	0.432837	69
ERCC5	0.21731	-28.1553	89
ERGIC1	0.950519	12.8271	100
ERGIC2	1.12035	9.74519	100
ERGIC3	1.00586	12.4087	100
ERH	0.683472	10.9175	100
ERI1	0.977991	11.1746	55
ERI3	0.704054	14.6773	100
ERLEC1	0.000966225	5.92362	100
ERLIN1	0.392815	-12.0044	100
[truncated: 5,059 more rows]

## Sheet: CPTAC_COAD_T
	BI_mean	bic_diff_mean	N
A1BG	1.20096	9.81141	97
A1CF	0.983528	8.08595	95
A2M	0.488571	12.2237	97
AAAS	0.226038	-6.30534	97
AACS	0.0981527	4.73591	97
AAGAB	0.591146	13.6853	97
AAK1	0.45314	12.1035	97
AAMDC	0.846839	13.9569	97
AAMP	0.518954	14.0002	97
AAR2	0.184848	3.49679	97
AARS	0.800443	10.9341	97
AARS2	0.168935	0.901788	97
AASDHPPT	0.546244	13.2621	97
AASS	0.158371	5.72164	87
AATF	0.840317	13.1532	97
ABAT	0.934336	7.53919	97
ABCA8	0.820314	11.178	97
ABCB1	0.367098	-2.89383	97
ABCB10	1.75951	-2.06017	91
ABCB6	5.75469	-15.3839	82
ABCB7	1.28617	7.08294	97
ABCB8	1.33423	3.62842	91
ABCC1	0.420855	13.4904	97
ABCC3	1.03535	10.3094	97
ABCC4	0.691804	13.6541	87
ABCD1	0.632157	12.3206	66
ABCD3	1.04862	10.8254	97
ABCE1	0.540135	14.008	97
ABCF1	1.19497	9.00707	97
ABCF2	0.124635	10.2016	97
ABCF3	1.13998	5.21733	97
ABHD10	0.196121	8.39393	97
ABHD11	0.777884	11.861	97
ABHD12	0.608535	7.22483	97
ABHD14B	0.502382	13.6688	97
ABHD16A	0.734211	14.0351	97
ABHD17C	0.332217	9.68089	70
ABHD6	0.531319	12.4461	69
ABI1	0.196688	-1.66729	97
ABI2	0.41956	4.79666	60
ABI3	0.591186	14.2112	97
ABI3BP	0.656222	12.4179	97
ABL1	0.0720681	1.52419	80
ABLIM1	0.861139	11.7021	97
ABO	1.11721	9.85708	51
ABR	0.498613	13.5659	97
ABRACL	0.224215	3.69151	97
ABT1	0.976075	5.96787	31
ACAA1	1.17083	11.0212	97
ACAA2	0.219051	1.1933	97
ACACA	0.567436	14.3767	97
ACAD10	0.150307	1.15908	97
ACAD8	1.12784	13.4389	97
ACAD9	0.602023	12.824	97
ACADM	0.239793	6.54588	97
ACADS	0.975251	5.54581	97
ACADSB	0.748439	7.77633	97
ACADVL	0.879008	14.362	97
ACAN	0.822366	13.1305	74
ACAP1	0.479652	6.61984	62
ACAP2	0.534746	14.4723	97
ACAT1	1.14466	8.97696	97
ACAT2	0.741297	4.86726	97
ACBD3	0.883377	-16.5348	97
ACBD5	0.878897	10.1913	97
ACBD6	0.475046	11.7871	51
ACE	0.430251	14.1694	88
ACE2	1.16479	10.2415	88
ACIN1	0.915452	13.5999	97
ACLY	0.701473	13.7661	97
ACO1	0.40771	12.6999	97
ACO2	0.980963	9.66834	97
ACOT1	0.202549	7.95724	97
ACOT11	1.03644	12.5706	97
ACOT13	1.15326	10.0923	97
ACOT7	0.904943	10.2091	97
ACOT8	0.765562	-1.96648	97
ACOT9	1.04566	10.5839	97
ACOX1	0.979613	12.9126	97
ACOX2	1.05373	10.6288	46
ACOX3	0.616278	8.68207	97
ACP1	0.583291	-13.9129	97
ACP2	0.987862	8.71178	97
ACP5	0.846093	12.6752	71
ACP6	0.527799	14.1903	97
ACPP	0.485245	7.64263	42
ACSF2	1.08165	8.40041	97
ACSF3	0.683613	13.6849	97
ACSL1	0.602625	14.5296	97
ACSL3	0.161491	4.33202	97
ACSL4	0.519264	10.7026	97
ACSL5	1.09769	10.4381	97
ACSM3	0.708465	10.6869	97
ACSS1	0.57906	-6.12423	97
ACSS2	0.589885	14.4369	97
ACTA1	0.105702	9.41136	40
ACTA2	1.38643	0.397155	63
ACTB	0.728686	10.511	32
ACTBL2	1.04895	6.48628	97
ACTG1	1.01587	11.2591	97
ACTG2	1.10502	-4.68256	97
ACTL6A	0.938869	12.943	97
ACTN1	1.27035	5.75262	97
ACTN2	0.212051	4.44487	97
ACTN3	0.59025	10.4886	34
ACTN4	0.263883	2.03392	97
ACTR10	0.64158	13.5464	97
ACTR1A	0.664817	12.4771	97
ACTR1B	0.104926	8.57808	97
ACTR2	0.913398	5.79054	97
ACTR3	0.451544	12.6523	97
ACTR5	0.39274	13.5178	81
ACTR6	0.609497	9.4911	39
ACTR8	0.430546	6.51647	44
ACY1	0.731171	6.07744	97
ACYP1	0.575326	12.3727	89
ACYP2	0.499889	12.9528	94
ADA	0.74555	13.2051	90
ADA2	0.0837784	2.98827	87
ADAM10	0.24242	8.29731	97
ADAM15	0.119978	6.54678	57
ADAM17	0.130443	-2.82761	96
ADAM9	0.760455	11.805	97
ADAMDEC1	0.862983	-26.0543	82
ADAMTS16	0.685011	10.3714	30
ADAMTSL4	0.701307	13.7519	93
ADAP1	0.381694	14.0975	97
ADAR	0.391084	8.36375	97
ADCK5	5.13171	-29.4679	40
ADCY6	0.589386	12.0966	84
ADD1	0.840502	14.3765	97
ADD2	0.876916	12.2074	87
ADD3	0.750369	14.1577	97
ADGRE5	0.179913	7.23913	97
ADGRG1	0.487317	13.8996	88
ADH1B	0.794909	10.8184	97
ADH1C	1.0506	10.1971	97
ADH4	0.0878019	5.00239	53
ADH5	0.598364	14.0424	97
ADH6	0.46011	3.46696	36
ADI1	0.883813	6.91244	92
ADIPOQ	0.624962	10.1733	48
ADIRF	0.99688	13.2173	97
ADK	0.834226	13.5827	97
ADNP	1.42971	3.97912	97
ADO	0.79289	11.2715	97
ADPGK	0.663044	8.03323	97
ADPRH	0.763654	13.0013	92
ADPRHL2	1.15595	10.738	97
ADRM1	0.359364	6.10171	97
ADSL	1.81878	1.12207	97
ADSS	0.802346	12.2721	97
ADTRP	0.597583	11.4281	54
AEBP1	0.649684	6.32871	97
AES	0.0467614	-2.9834	55
AFAP1	0.946286	5.29787	95
AFAP1L2	0.514861	12.4923	93
AFDN	0.474917	13.6264	97
AFF4	0.581288	12.4417	55
AFG1L	1.51399	7.10447	50
AFG3L2	1.14737	-1.17175	97
AFM	0.973437	7.74712	97
AFTPH	0.801189	7.06709	97
AGAP1	0.445306	8.54663	67
AGAP3	4.03078	-34.8395	71
AGFG1	0.186526	2.9402	97
AGFG2	0.567562	13.526	97
AGK	0.588264	13.258	97
AGL	1.32388	7.60388	97
AGMAT	1.74062	-4.94094	97
AGO1	0.901408	12.7874	97
AGO2	0.825977	13.2367	97
AGO3	0.895077	12.9468	88
AGPAT1	0.240553	8.87508	97
AGPAT2	1.09117	11.3398	93
AGPAT3	0.874671	13.3292	97
AGPAT5	0.0311645	5.62061	97
AGPS	0.5698	10.9025	97
AGR2	0.796057	10.2047	97
AGR3	1.14154	9.32255	97
AGRN	0.538117	14.2609	97
AGT	0.690589	12.8224	97
AGTRAP	1.39438	5.75458	83
AHCTF1	0.188749	-12.465	97
AHCY	0.731822	6.58751	97
AHCYL1	0.916271	13.4217	97
AHCYL2	1.09796	7.75387	97
AHNAK	0.160851	7.95255	97
AHNAK2	1.11908	8.48233	97
AHR	0.680839	11.7815	81
AHSA1	1.01825	11.2569	97
AHSG	1.25067	7.44116	97
AHSP	0.252914	6.39839	65
AIDA	0.97321	12.2996	97
AIF1	0.832927	13.6155	96
AIFM1	1.06838	8.52475	97
AIFM2	0.453682	9.09921	72
AIG1	0.397931	11.0362	44
AIM1	0.634774	13.9	97
AIMP1	0.938051	10.5242	97
AIMP2	0.568602	13.8677	97
AIP	0.846179	2.6821	97
AK1	1.1057	10.3265	97
AK2	0.820496	12.0056	97
AK3	0.647082	14.0744	97
AK4	0.976639	4.6834	97
AK6	0.629305	10.2584	34
AKAP1	0.876112	12.5677	97
AKAP12	1.24808	8.08822	97
AKAP13	1.06316	11.4447	97
AKAP17A	0.0337061	7.15651	84
AKAP5	0.0827728	-6.70733	62
AKAP8	0.852401	12.0853	97
AKAP8L	0.55757	12.3625	97
AKAP9	0.575453	14.1968	97
AKR1A1	0.8237	13.4619	97
AKR1B1	1.08919	9.95824	97
AKR1B10	0.831894	7.44202	97
AKR1C2	1.67397	-1.75059	81
AKR1C3	1.09161	11.8378	97
AKR1D1	0.758679	13.8941	86
AKR7A2	4.37733	-4.50225	97
AKR7A3	0.640575	14.2749	97
AKT1	0.511146	11.3512	97
AKT1S1	0.627844	-21.8807	88
AKT2	0.83584	11.7527	82
AKTIP	0.0981789	4.07496	68
ALAD	0.963022	9.02715	97
ALB	1.08893	9.81138	97
ALCAM	0.543093	-5.46107	97
ALDH16A1	0.805647	12.9908	97
ALDH18A1	0.96634	7.70686	97
ALDH1A1	0.790271	13.7881	97
ALDH1A3	1.39463	7.65164	97
ALDH1B1	1.08717	11.627	97
ALDH1L1	0.646031	8.82912	97
ALDH1L2	0.829865	13.1511	97
ALDH2	0.857735	12.6918	97
ALDH3A2	0.715913	14.2596	97
ALDH3B1	0.281385	2.9675	39
ALDH4A1	0.572555	-6.6778	97
ALDH5A1	0.695465	12.1375	97
ALDH6A1	0.305144	5.69402	97
ALDH7A1	0.903324	13.5851	97
ALDH9A1	0.57981	13.704	97
ALDOA	0.532023	13.6389	97
ALDOB	0.59075	9.50934	97
ALDOC	0.859061	12.4038	97
ALG1	0.609293	11.0062	97
ALG11	0.70613	11.796	91
ALG12	0.807617	13.9408	84
ALG13	0.686505	-6.68919	89
ALG14	1.17444	9.83022	45
ALG2	0.47182	3.76252	97
ALG5	0.631948	6.98226	97
ALG6	1.07962	7.88296	31
ALG8	0.485555	-2.15514	46
ALG9	0.70109	13.5328	76
ALKBH5	0.783306	-11.9791	66
ALKBH7	0.881305	7.91911	33
ALOX15	0.870422	12.7829	97
ALOX5	1.02306	4.59694	97
ALOX5AP	0.489712	14.0907	93
ALPL	0.780443	1.99811	76
ALYREF	0.574747	14.0673	97
AMACR	1.26996	4.74394	97
AMBP	0.882439	13.3969	97
AMDHD2	0.738504	7.37203	84
AMPD2	1.09803	10.6807	97
AMPD3	0.319463	-2.00749	97
AMT	0.74186	13.5939	97
AMY2A	1.13013	7.69345	63
ANAPC1	0.0531829	-0.181719	82
ANAPC10	0.237067	8.17936	32
ANAPC16	0.908874	12.0684	50
ANAPC2	0.872645	9.07233	47
ANAPC4	0.965767	2.60458	85
ANAPC5	0.809002	13.5279	85
ANAPC7	0.730347	11.4687	97
ANG	0.460117	13.914	97
ANGPTL2	1.02214	12.2157	97
ANK1	0.440088	1.98503	97
ANK2	0.657017	12.0775	97
ANK3	0.821124	9.92568	97
ANKFY1	0.91288	14.0477	97
ANKHD1	0.171333	-0.0869104	97
ANKLE2	0.548341	13.5198	83
ANKMY2	0.573675	-0.746335	97
ANKRD10	0.940597	10.1114	36
ANKRD13A	0.369392	13.4061	97
ANKRD17	0.0516818	1.86467	90
ANKRD22	0.863483	11.3506	97
ANKRD27	0.751599	9.7291	56
ANKRD28	0.172443	-15.6059	95
ANKRD44	0.602072	14.385	97
ANKRD54	0.30763	13.1121	74
ANKS1A	0.613913	10.7897	97
ANKS4B	0.621674	9.94376	97
ANKZF1	0.75671	9.98408	46
ANLN	0.512683	5.83261	54
ANO1	0.647434	11.1694	83
ANO10	0.731716	12.2358	97
ANO6	1.33973	6.23023	97
ANP32A	0.582726	13.8873	97
ANP32B	0.553058	13.9589	97
ANP32E	0.699997	3.43239	97
ANPEP	0.43239	-5.50575	97
ANTXR1	1.24232	8.56652	78
ANTXR2	0.568686	12.3149	92
ANXA1	0.233217	9.13807	97
ANXA11	0.414132	12.6394	97
ANXA13	0.493573	8.94085	97
ANXA2	0.739336	8.99623	97
ANXA3	0.433082	12.2275	97
ANXA4	0.970658	12.8659	97
ANXA5	1.42432	2.12603	97
ANXA6	1.15468	6.93734	97
ANXA7	0.763421	13.2586	97
AOC1	0.692361	6.8071	97
AOC3	1.26947	3.73721	97
AOX1	0.111501	8.53812	48
AP1B1	0.488003	13.8548	97
AP1G1	0.75984	13.4399	97
AP1G2	0.55895	7.98308	97
AP1M1	0.733762	13.4651	97
AP1M2	1.50487	5.09557	97
AP1S1	0.72054	14.2596	97
AP1S2	1.17438	7.41735	67
AP2A1	0.609457	12.91	97
AP2A2	0.149511	-15.5632	97
AP2B1	0.337429	4.79216	97
AP2M1	0.413224	14.033	97
AP2S1	0.629355	-2.14235	97
AP3B1	0.994781	11.0893	97
AP3D1	0.440945	14.2722	97
AP3M1	1.07676	9.28567	97
AP3M2	0.543551	13.2896	84
AP3S1	0.332192	14.2246	97
AP5B1	0.98975	9.10289	84
AP5S1	0.682479	7.72194	35
AP5Z1	0.129357	-8.16492	60
APAF1	0.0413313	-1.18732	97
APBB1IP	0.440332	9.00404	97
APBB2	1.08671	7.19699	65
APCS	1.00288	11.5605	97
APEH	0.643624	14.3854	97
APEX1	0.656231	9.43536	97
API5	0.77117	13.1266	97
APIP	1.14074	7.56478	97
APLP2	0.113164	-1.71606	97
APMAP	0.833756	14.4917	97
APOA1	1.02682	10.4783	97
APOA2	1.12818	12.0293	97
APOA4	0.958098	13.6977	97
APOB	1.0334	11.6743	97
APOBEC3C	0.218328	8.90527	46
APOBEC3F	0.299333	6.71024	50
APOBEC3G	0.501956	10.899	53
APOBR	1.20965	5.94699	97
APOC1	0.534233	13.5162	97
APOC2	0.591505	13.5731	91
APOC3	0.889558	14.1077	97
APOD	1.15437	10.3402	97
APOE	0.943109	9.5454	97
APOF	0.573947	12.4935	57
APOH	1.20247	7.94966	97
APOL1	0.59168	11.9747	94
APOL2	0.581036	9.08872	97
APOL3	1.0682	11.8704	97
APOM	0.957859	13.2908	97
APOO	0.265226	9.01273	97
APOOL	0.101132	3.94484	97
APP	0.881063	-4.84114	97
APPL1	0.770385	10.2096	97
APPL2	0.831899	13.8215	97
APRT	1.10819	11.0906	97
APTX	0.858651	12.7228	70
AQP1	0.834692	13.5017	95
AQP8	0.905113	12.1334	74
AQR	0.270271	-14.8527	97
ARAF	0.604915	13.9676	90
ARAP1	0.47243	13.6847	97
ARCN1	0.783951	10.766	97
AREG	2.28012	4.88724	38
ARF1	1.27155	1.28989	93
ARF3	1.86763	-4.68659	81
ARF4	0.754086	13.9161	97
ARF5	0.55639	13.5984	97
ARF6	0.993994	-6.496	97
ARFGAP1	0.462332	7.95212	97
ARFGAP2	1.00024	12.796	97
ARFGAP3	0.59521	14.308	97
ARFGEF1	0.491954	8.59895	97
ARFGEF2	1.14929	10.8105	97
ARFGEF3	1.04582	9.13788	80
ARFIP1	1.30158	5.40305	97
ARFIP2	1.00269	12.3539	94
ARFRP1	0.592908	11.824	90
ARG1	1.12657	11.7177	97
ARGLU1	0.17705	-35.9806	97
ARHGAP1	0.542211	14.321	97
ARHGAP10	0.725806	9.04928	97
ARHGAP12	0.133698	5.0359	87
ARHGAP15	1.12829	9.49681	55
ARHGAP17	0.351106	8.34061	97
ARHGAP18	0.249467	-3.33149	97
ARHGAP21	0.812341	11.9648	58
ARHGAP25	0.816716	13.5578	97
ARHGAP26	1.48071	3.41388	84
ARHGAP27	0.19078	3.0247	97
ARHGAP30	0.794685	11.0375	63
ARHGAP32	0.917033	11.2583	60
ARHGAP35	0.414671	0.0828088	95
ARHGAP4	0.588568	14.0626	97
ARHGAP45	0.70359	14.3991	97
ARHGAP5	0.976577	-15.9159	97
ARHGAP6	0.771596	10.2671	60
ARHGAP9	0.668514	12.0129	84
ARHGDIA	0.849496	-10.7621	97
ARHGDIB	0.957179	8.77603	97
ARHGEF1	0.804498	-14.5765	97
ARHGEF10	2.64888	3.22348	36
ARHGEF10L	0.851272	13.645	97
ARHGEF11	0.41461	12.6605	74
ARHGEF12	0.525128	13.5454	97
ARHGEF16	0.916003	12.646	97
ARHGEF17	0.736694	12.8167	97
ARHGEF18	0.653704	8.98769	97
ARHGEF2	0.58005	7.74488	97
ARHGEF25	1.75057	-3.44745	36
ARHGEF37	0.42875	13.0096	92
ARHGEF40	0.197601	-10.5402	81
ARHGEF5	0.829022	13.5263	89
ARHGEF6	0.853579	13.8263	97
ARHGEF7	0.473388	14.2763	97
ARID1A	0.729044	11.6369	95
ARID1B	0.692608	13.7247	88
ARID2	2.08453	2.56771	78
ARID3A	0.0696172	3.40595	87
ARIH1	0.583729	6.20163	97
ARIH2	1.17146	11.2738	82
ARL 1.00	0.78787	12.867	97
ARL 15.00	0.347655	14.0463	97
ARL 2.00	0.892137	-12.7359	97
ARL2BP	0.683065	-3.24348	68
ARL 3.00	1.11052	-12.1061	97
ARL 6.00	0.943815	12.0571	57
ARL6IP1	0.753832	9.62609	97
ARL6IP4	0.643528	14.0686	97
ARL6IP5	0.33062	7.44018	97
ARL6IP6	0.0117923	8.51586	78
ARL8A	0.48115	13.8756	88
ARL8B	0.428932	13.878	97
ARMC1	0.311074	7.65302	97
ARMC10	0.595658	12.6985	97
ARMC6	0.783827	14.4382	97
ARMC8	0.0396806	7.08558	95
ARMCX2	0.413597	10.8304	86
ARMCX3	0.0866635	5.27459	97
ARMT1	0.572154	13.5109	97
ARNT	0.690303	10.6532	35
ARPC1A	0.533285	13.2174	97
ARPC1B	0.621691	13.2452	97
ARPC2	0.50912	14.0814	97
ARPC3	0.396733	14.1627	97
ARPC4	0.628237	13.9635	97
ARPC5	1.07802	-1.26781	97
ARPC5L	0.704153	2.64124	97
ARPP19	0.726082	13.7486	86
ARR3	0.325949	-0.802051	94
ARRB1	0.803073	13.3796	97
ARRB2	0.233686	2.81251	97
ARRDC1	0.220921	-18.1395	82
ARSA	0.562049	10.3224	97
ARSB	0.374591	12.1209	88
ARSD	0.376807	7.83576	57
ARSE	0.500278	12.5775	95
ARVCF	0.662113	6.20497	76
ASAH1	0.414024	-4.44836	97
ASAP1	0.435729	-0.554531	76
ASAP2	0.846965	5.07901	87
ASB9	0.387961	0.792008	39
ASCC1	0.778901	12.9001	76
ASCC2	0.0360011	-5.57245	97
ASCC3	0.970624	10.7385	97
ASF1A	0.880354	9.34842	56
ASH2L	0.842829	12.6446	97
ASL	0.650618	13.8682	97
ASMTL	0.329428	6.32848	97
ASNA1	1.19305	8.45298	97
ASNS	1.04461	0.0278335	97
ASPA	2.32045	-15.4909	34
ASPH	0.904187	7.35643	97
ASPN	1.76355	-7.42832	97
ASPSCR1	0.240325	10.6607	97
ASRGL1	0.656841	7.75735	76
ASS1	0.68431	12.6414	97
ATAD1	0.196738	9.224	97
ATAD2	0.0726181	8.11022	64
ATAD3A	0.773215	11.3071	97
ATAD3B	1.06271	10.7967	53
ATE1	0.415028	14.1177	97
ATF1	0.0681048	1.47723	55
ATF7IP	0.427534	12.1402	52
ATG12	0.037219	-7.01144	66
ATG16L1	0.649613	12.1455	97
ATG3	0.50599	9.23859	97
ATG4A	0.647532	10.3647	34
ATG4B	0.459572	-8.15279	97
ATG5	0.686251	6.60644	97
ATG7	0.741843	11.7773	97
ATG9A	0.91507	9.59689	76
ATIC	0.3947	11.9031	97
ATL1	0.924899	13.0628	97
ATL2	0.0391904	9.61912	97
ATL3	0.915125	13.3318	97
ATM	0.173679	4.1059	97
ATOX1	0.574129	14.3623	97
ATP11B	0.543556	9.5255	97
ATP11C	0.733233	12.8929	76
ATP12A	0.468133	-2.88597	68
ATP13A1	1.16436	8.44816	97
ATP1A1	1.11401	9.69856	97
ATP1A2	0.924528	12.8339	91
ATP1A3	1.52363	4.66158	56
ATP1B1	0.960431	12.5613	97
ATP1B3	0.87025	12.4736	97
ATP2A1	0.614456	14.2619	93
ATP2A2	0.757208	6.24021	97
ATP2A3	1.14552	10.0163	97
ATP2B1	0.224282	5.56447	97
ATP2B2	1.11643	5.24694	62
ATP2B4	1.06678	1.51097	97
ATP2C1	0.977342	13.4395	96
ATP5A1	1.12673	7.72501	97
ATP5B	0.977224	3.74519	97
ATP5C1	0.445402	13.016	97
ATP5D	0.809023	-0.0137452	97
ATP5E	0.871589	7.47617	97
ATP5F1	1.09447	4.34415	97
ATP5G1	0.257668	7.57698	97
ATP5H	1.01082	7.98883	97
ATP5I	0.834648	6.45689	97
ATP5J	0.412666	14.2231	97
ATP5J2-PTCD1	0.563931	6.81691	97
ATP5L	0.929148	10.0483	97
ATP5O	0.807167	9.98901	97
ATP5S	0.859684	7.96273	97
ATP5SL	0.436468	12.4385	92
ATP6AP1	1.00055	10.6529	97
ATP6AP2	0.567444	13.9554	97
ATP6V0A1	0.618918	4.82676	97
ATP6V0A2	0.850077	9.17307	84
ATP6V0C	1.07344	7.20411	69
ATP6V0D1	0.537661	14.1791	97
ATP6V1A	0.544126	14.2941	97
ATP6V1B2	0.572468	12.6054	97
ATP6V1C1	0.835561	8.46789	97
ATP6V1D	1.41483	4.35959	97
ATP6V1E1	0.580034	8.35964	97
ATP6V1F	0.318388	9.37409	97
ATP6V1G1	0.585512	13.5765	97
ATP6V1H	0.195501	8.80211	97
ATP8A1	0.680084	12.5527	78
ATP8B1	0.676986	1.92573	97
ATP9A	0.120504	5.50639	97
ATPAF1	0.688372	14.3829	97
ATPAF2	0.287414	10.954	90
ATPIF1	0.550836	4.45545	97
ATRAID	0.082335	5.45889	84
ATRN	0.318852	-5.77546	80
ATRX	0.896094	12.7682	97
ATXN10	0.693552	14.4648	97
ATXN2	0.407041	2.87211	97
ATXN2L	0.579799	4.97411	97
ATXN3	0.0648481	2.87949	82
ATXN7L3B	1.39087	5.74316	69
AUH	0.732413	12.5585	97
AUP1	0.819278	9.83558	97
AVEN	10.0562	-56.3126	94
AVL9	0.220242	5.06781	97
AZGP1	1.08934	12.0791	97
AZU1	0.948945	12.1847	97
B2M	1.25593	8.89527	97
B3GALT5	0.653483	12.2131	69
B3GAT3	0.190448	-2.04361	81
B3GLCT	0.772388	13.7042	83
B3GNT3	0.459187	-0.495004	97
B3GNT6	0.750566	8.18454	94
B3GNT7	0.621856	6.63165	63
B4GALNT2	2.07465	1.46461	61
B4GALT1	0.305049	13.871	97
B4GALT4	0.673518	14.2388	97
B4GALT7	0.893924	-1.21784	54
B4GAT1	0.815358	10.0254	52
BABAM1	0.570027	14.3357	97
BACH1	0.743078	-9.38161	58
BAD	0.66961	11.9525	50
BAG1	0.557174	9.58085	97
BAG2	1.00902	12.6413	97
BAG3	1.07401	2.63068	97
BAG4	6.86427	-23.5012	45
BAG5	0.49284	13.5908	97
BAG6	0.577945	9.86693	97
BAIAP2	0.483801	4.11593	97
BAIAP2L1	0.583552	11.5873	97
BAIAP2L2	0.971984	9.18132	41
BAK1	0.695068	1.88119	73
BANF1	0.549287	5.19616	97
BASP1	1.39715	5.37416	97
BAX	0.767757	13.266	97
BAZ1A	0.52512	-8.2013	68
BAZ1B	0.646666	2.35485	97
BAZ2A	0.5792	8.05557	78
BCAM	0.695535	13.3074	97
BCAP29	1.12205	12.2559	93
BCAP31	1.34096	1.43481	97
BCAR1	0.426346	13.8586	87
BCAS1	1.22394	5.01102	97
BCAS2	0.966363	12.3305	97
BCAS3	0.462928	11.8709	72
BCAT1	0.637684	6.48003	56
BCAT2	0.435229	-9.86999	97
BCCIP	0.451751	12.8067	97
BCHE	0.829292	13.699	85
BCKDHA	0.411291	-3.04763	97
BCKDHB	0.505604	13.8374	97
BCKDK	0.126053	4.54961	97
BCL10	0.693256	13.9221	97
BCL2L1	0.292768	9.30401	90
BCL2L13	0.824967	6.11357	97
BCL2L14	0.880406	-1.33871	71
BCL2L15	0.713782	13.1687	97
BCL7C	0.812841	12.2259	53
BCLAF1	0.76026	14.2926	97
BCR	0.674743	13.2956	97
BCS1L	0.450266	-0.127832	97
BDH1	0.845675	14.368	97
BDH2	0.762329	11.2188	97
BECN1	0.748084	12.9841	78
BET1	0.855198	2.38461	78
BET1L	0.557569	14.0034	97
BGN	1.55618	1.01632	97
BICD2	0.546696	13.7421	84
BID	0.246996	5.79861	97
BIN1	0.681509	10.1574	97
BIN2	0.680938	7.02505	93
BIN3	0.930353	12.3838	90
BIRC2	0.0133185	-8.52619	32
BIRC6	1.15978	10.8155	97
BLMH	0.681416	6.99777	97
BLOC1S1	0.0039293	-1.48316	97
BLOC1S2	5.4253	-109.938	83
BLOC1S3	1.01408	12.3286	83
BLOC1S4	0.333467	-14.5016	92
BLOC1S5	0.184575	5.76864	87
BLOC1S6	0.786405	13.9528	92
BLVRA	1.26789	7.54507	97
BLVRB	0.782139	13.7368	97
BMP2K	0.261078	13.7602	97
BMS1	0.510064	14.0931	97
BNIP1	0.547177	12.4785	59
BNIP2	0.449049	10.4865	31
BOD1	1.85882	7.74546	30
BOD1L1	1.01612	12.0749	97
BOK	0.469866	12.4134	84
BOLA2	0.435282	13.8277	97
BOLA3	0.0205436	6.98273	77
BOP 1.00	0.979343	11.1878	97
BORCS5	4.5669	-7.52078	53
BORCS6	0.235554	-2.96964	70
BORCS7	0.508911	10.0798	64
BPGM	0.30126	6.63594	97
BPHL	0.932081	12.3895	97
BPI	0.768812	13.9711	97
BPNT1	0.424041	9.58034	97
BPTF	0.0649459	-3.41241	84
BRAP	0.561791	5.75863	94
BRAT1	0.644783	13.1529	84
BRCC3	0.527889	5.65491	97
BRD1	0.0462822	7.82237	38
BRD2	0.142854	5.90615	94
BRD3	0.0553792	9.40896	87
BRD4	0.868671	12.2193	97
BRD7	1.4379	3.4825	72
BRD8	0.249937	9.24758	52
BRD9	1.30571	8.06178	40
BRE	1.44527	-1.22352	97
BRI3	0.122078	-4.6951	58
BRI3BP	0.533331	13.2741	95
BRIX1	0.607891	13.1442	97
BRK1	0.246395	-7.2689	97
BROX	0.954894	-5.36992	97
BRPF1	0.769813	12.34	59
BSDC1	1.03865	12.1983	83
BSG	0.378741	14.1735	97
BSPRY	0.46639	10.475	97
BST1	0.219648	9.00759	97
BST2	1.06266	11.5848	97
BTAF1	0.465819	12.2559	90
BTD	0.763966	13.7585	97
BTF3	0.890607	12.7732	97
BTF3L4	0.158245	2.0053	97
BTK	1.26605	8.77627	63
BTN2A1	0.169059	3.88747	43
BTN3A3	0.841169	11.0302	87
BUB3	0.891705	11.2585	97
BUD13	0.697107	10.0209	57
BUD23	0.443914	6.88022	87
BUD31	0.755045	14.0937	97
BYSL	1.03921	7.75342	97
BZW1	0.838784	13.6362	97
BZW2	0.650538	13.123	97
C10orf11	0.864108	2.17729	61
C10orf35	1.02615	8.97247	53
C10orf76	0.152358	-3.9301	97
C10orf99	0.0205033	-18.1923	86
C11orf54	1.03709	5.83384	97
C11orf58	0.854721	2.66455	97
C11orf68	0.503106	12.7493	97
C11orf96	1.07658	11.6713	82
C11orf98	0.692936	11.0646	97
C12orf10	0.423092	13.4899	97
C12orf4	0.0381365	6.20223	50
C12orf45	0.00724462	1.39728	43
C12orf57	0.0423682	-6.21476	67
C14orf1	0.309265	-0.198575	89
C14orf159	0.29608	7.12133	97
C14orf166	0.544898	13.5424	97
C14orf2	0.188381	7.96031	97
C15orf38-AP3S2	0.429364	1.55893	97
C15orf40	0.33408	12.2405	55
C15orf48	1.23424	4.47021	97
C15orf52	1.25581	5.83247	97
C16orf58	0.503905	10.5374	97
C16orf62	0.898615	8.35	97
C16orf70	1.25777	1.09491	36
C16orf91	1.17188	9.97118	44
C17orf49	0.91742	12.0738	97
C17orf58	0.844391	9.50804	90
C17orf62	1.15982	10.8038	97
C17orf75	0.0126611	7.26418	97
C18orf25	0.779573	9.92753	31
C18orf32	0.340722	11.3242	97
C18orf8	0.141014	10.3882	92
C19orf12	0.900471	1.52451	34
C19orf25	0.961136	11.7233	97
C19orf33	0.71096	14.1306	92
C19orf43	1.02315	9.48195	97
C19orf53	0.823794	11.8859	88
C19orf66	0.68713	7.29219	97
C19orf70	0.119204	0.0588458	97
C1D	0.38896	5.85232	57
C1GALT1	0.591669	9.67503	38
C1QA	0.616604	11.8099	97
C1QB	0.654383	10.0211	97
C1QBP	0.89873	10.7205	97
C1QC	0.687472	10.6412	97
C1R	0.0762823	8.37219	97
C1RL	0.072746	5.3907	66
C1S	0.543749	14.3277	97
C1orf116	0.182742	7.91585	92
C1orf122	0.710877	11.0306	44
C1orf123	0.742474	9.76706	97
C1orf174	0.409935	11.7969	50
C1orf198	0.545866	14.1796	94
C1orf21	0.431807	10.8571	40
C1orf210	0.685817	10.5791	36
C1orf27	1.04215	10.7554	97
C1orf35	0.374262	14.1771	93
C1orf50	1.00902	4.23779	84
C2	0.970177	12.8076	97
C20orf24	0.782981	8.20452	75
C20orf27	0.835033	13.1891	89
C21orf33	0.571771	-6.02371	97
C21orf59	0.1424	1.5897	86
C2CD5	0.88719	9.41684	97
C2orf49	0.489035	12.9668	82
C2orf69	5.94709	-17.7476	52
C2orf72	0.617483	8.31239	51
C2orf88	1.23653	8.19599	60
C3	0.736482	13.9583	97
C3orf38	0.0460662	-11.5964	84
C3orf58	0.488619	6.67675	47
C4A	0.662298	14.2196	97
C4B	0.622104	12.3031	97
C4BPA	0.717254	5.42315	97
C4BPB	0.649976	5.75086	97
C4orf3	0.245406	-0.88326	71
C4orf32	1.10667	11.5468	65
C4orf33	2.06354	4.51467	32
C5	0.722905	11.74	97
C5AR1	0.464707	12.0042	66
C5orf15	0.0861541	-10.8658	34
C5orf24	0.644072	11.2422	51
C5orf51	0.0884953	6.24343	70
C6	0.766729	12.7709	97
C6orf132	0.776541	10.9532	47
C6orf203	0.549385	14.1913	97
C6orf47	0.905874	12.3978	75
C6orf89	1.28232	0.304315	52
C7	0.393181	11.1251	97
C7orf26	0.664448	12.5553	66
C7orf50	0.96406	13.1545	97
C8A	0.562222	13.6095	97
C8B	0.644376	13.904	97
C8G	0.369195	8.91418	97
C8orf33	0.934692	12.278	74
C8orf82	0.875427	11.1588	97
C9	0.953663	12.3943	97
C9orf142	0.451247	9.68178	97
C9orf64	0.58757	12.9004	97
C9orf78	0.589396	12.3632	78
CA1	0.864357	10.9597	97
CA12	0.918851	12.559	97
CA13	0.30181	2.50706	89
CA2	1.42835	-2.32604	97
CA3	0.382604	3.12352	35
CA4	0.741144	12.6237	97
CA9	1.21751	6.00141	61
CAAP1	0.393748	11.3262	68
CAB39	0.620437	10.9058	97
CAB39L	0.555097	-8.84457	97
CACFD1	0.526319	10.6016	41
CACNA2D1	0.966852	4.81557	97
CACTIN	0.510167	9.55126	54
CACUL1	0.0893978	8.76363	54
CACYBP	0.559903	5.29699	97
CAD	0.566825	12.9829	97
CADM1	0.393846	13.6646	87
CADM3	0.903862	13.3804	97
CADM4	1.61926	7.58255	32
CADPS	0.360395	8.43483	54
CALB2	0.733994	14.4084	97
CALCOCO1	0.254953	-10.004	86
CALCOCO2	0.254911	2.65099	97
CALD1	1.14672	7.3877	97
CALM2	0.86905	7.42557	97
CALML4	0.682778	14.0964	93
CALR	1.01569	7.56555	97
CALU	1.02465	12.4327	97
CAMK1	0.823607	14.006	97
CAMK1D	0.546422	9.71054	97
CAMK2D	0.773409	13.1945	97
CAMK2G	0.857596	4.84118	97
CAMKK2	0.510641	3.52162	91
CAMP	1.11674	11.9248	97
CAMSAP3	0.496405	14.3695	97
CAND1	0.654162	9.63939	97
CAND2	0.251257	-14.8768	66
CANT1	1.03654	10.8735	97
CANX	0.427742	14.2648	97
CAP1	1.04024	10.3797	97
CAP2	0.943402	6.92086	97
CAPG	1.12335	8.72911	97
CAPN1	0.505476	11.2258	97
CAPN15	1.52251	5.24703	49
CAPN2	0.488131	13.056	97
CAPN5	0.888532	13.332	97
CAPN6	1.04245	6.85292	40
CAPN7	0.24953	-15.5717	97
CAPN9	0.658047	11.2686	49
CAPNS1	0.310421	3.88791	97
CAPRIN1	0.940001	9.60767	97
CAPS	1.02667	-15.5405	59
CAPZA1	1.00085	13.1679	97
CAPZA2	0.619261	9.23648	97
CAPZB	0.591743	11.8016	97
CARD16	0.872064	12.661	85
CARD19	0.589456	14.2859	94
CARHSP1	0.836284	12.7267	97
CARM1	0.830698	14.0744	97
CARMIL1	1.02513	11.6252	97
CARNMT1	0.62764	-2.54334	62
CARS	0.877791	11.8553	97
CARS2	0.125889	5.41202	97
CASC3	0.505388	12.9947	76
CASC4	0.351613	14.0279	96
CASD1	1.28726	9.46492	50
CASK	0.522967	11.6563	97
CASKIN2	0.770897	9.39695	41
CASP1	0.861103	3.10623	97
CASP10	0.108972	9.31262	97
CASP2	0.588331	12.9348	88
CASP3	0.790513	8.49999	97
CASP4	0.95827	10.442	73
CASP6	1.26858	7.1961	97
CASP7	0.742224	12.6596	97
CASP8	0.255001	5.31674	92
CASP9	0.943827	9.87588	45
CASQ2	1.17762	4.24525	57
CAST	0.378638	11.6393	97
CAT	1.05811	9.75622	97
CAV1	1.09043	10.1655	97
CAV2	0.149459	9.75887	74
CBFB	0.0792666	6.42162	97
CBL	0.0738045	6.9023	97
CBLB	4.25255	-5.31807	65
CBLL1	0.209742	8.41848	45
CBR1	0.885605	6.24859	97
CBR3	0.539995	9.99799	97
CBR4	1.43062	5.30401	97
CBWD1	0.409152	13.7034	82
CBX1	0.620555	13.6659	97
CBX3	0.539327	5.81902	97
CBX5	0.579738	4.53212	97
CBX8	0.30571	3.73291	94
CC2D1A	1.16357	9.4648	97
CC2D1B	0.0267562	3.48536	97
CCAR1	0.300236	-40.0947	97
CCAR2	1.26013	7.25177	97
CCDC115	0.459095	12.7842	66
CCDC117	1.54779	6.98048	30
CCDC12	0.533966	12.8511	80
CCDC124	0.347114	-16.2378	97
CCDC127	0.388921	13.7682	85
CCDC134	0.514279	9.95674	94
CCDC137	0.330939	10.9546	36
CCDC186	0.249798	-3.23623	88
CCDC22	0.383101	-9.87381	97
CCDC25	0.899087	4.96862	97
CCDC28A	0.216587	9.54557	73
CCDC43	0.168655	10.5179	85
CCDC47	0.856274	11.5584	97
CCDC50	0.946765	11.619	97
CCDC51	0.747052	10.3626	97
CCDC58	0.935043	12.4374	97
CCDC6	0.905113	13.1133	97
CCDC61	3.81248	-4.30199	47
CCDC80	0.670432	3.87471	55
CCDC86	0.417109	13.9573	97
CCDC88B	0.568635	8.80387	47
CCDC9	0.699082	7.21338	97
CCDC90B	1.03338	8.82956	82
CCDC91	0.703574	14.153	92
CCDC93	0.401341	8.48407	97
CCDC94	0.01479	2.89229	80
CCDC97	0.494927	12.2467	60
CCL20	1.23208	1.92103	32
CCL21	1.12433	10.1306	97
CCL24	0.732468	1.52029	68
CCM2	0.763661	8.60608	59
CCNB1	1.08877	10.3391	45
CCNH	0.73921	-4.04342	59
CCNK	0.672393	13.2877	97
CCNL1	0.721726	6.35067	42
CCNT1	0.587698	10.9233	86
CCNY	5.78981	-15.9673	69
CCNYL1	0.179053	8.37462	38
CCPG1	1.1653	8.07167	34
CCS	0.287989	9.93677	97
CCT2	1.10921	10.4945	97
CCT3	0.948404	13.5774	97
CCT4	0.886617	13.5997	97
CCT5	1.08441	11.1765	97
CCT6A	0.795929	13.4072	97
CCT7	0.709113	14.3019	97
CCT8	0.870288	13.6777	97
CCZ1	0.481674	13.8129	97
CD109	0.662784	12.6938	97
CD14	0.691885	11.8918	97
CD151	0.348339	12.407	97
CD163	0.966707	8.08586	97
CD163L1	0.453081	8.75102	80
CD164	0.595701	7.46396	63
CD177	0.226842	3.99782	97
CD180	1.15339	8.46251	44
CD2	1.22853	10.5552	77
CD200	0.843869	10.1525	31
CD209	0.97257	12.7899	87
CD248	0.824749	13.1294	97
CD276	0.806501	13.7945	97
CD2AP	0.318302	8.8216	97
CD2BP2	0.491716	12.5006	97
CD300A	0.707433	11.7771	49
CD34	0.858102	13.6583	97
CD36	0.808379	-4.70593	97
CD38	1.18776	11.6663	97
CD3EAP	0.308586	4.53381	95
CD4	0.464022	8.11978	69
CD40	1.51365	7.82951	39
CD44	0.948609	11.6669	97
CD46	0.609353	13.0853	97
CD47	0.402532	-12.8015	97
CD48	0.396803	7.64883	93
CD5	0.457955	9.2311	74
CD53	0.560249	12.3619	87
CD55	0.929944	-2.04499	97
CD58	0.194479	1.18601	67
CD59	0.158608	8.54519	97
CD5L	0.973476	12.8348	97
CD63	0.0717878	9.18925	97
CD68	1.58831	-14.9995	44
CD74	1.10567	10.6917	97
CD81	0.870405	9.00444	97
CD82	0.962241	13.4433	93
CD8A	0.590046	11.8703	48
CD9	0.273504	0.341176	97
CD93	0.0403609	5.5383	87
CD99	0.936129	7.144	97
CD99L2	0.834866	13.0297	71
CDA	0.863793	1.59001	92
CDC123	0.390374	10.3717	83
CDC16	0.0792027	7.0943	97
CDC23	0.574708	14.3912	93
CDC26	0.709261	10.7647	38
CDC27	0.0860418	4.88017	97
CDC37	0.738677	13.6161	97
CDC37L1	0.824971	11.0756	55
CDC40	0.882248	9.00788	97
CDC42	1.04222	10.984	97
CDC42BPA	0.423765	13.5906	93
CDC42BPB	0.920471	12.7846	97
CDC42BPG	0.495486	6.95434	47
CDC42EP1	0.00847873	-14.2722	91
CDC42EP4	1.06369	5.74694	97
CDC42EP5	0.947563	10.8014	87
CDC42SE1	0.275463	5.33982	65
CDC42SE2	0.746035	12.4259	60
CDC5L	1.2239	6.73152	97
CDC73	0.877403	-12.069	97
CDCA5	1.20059	6.4771	36
CDCP1	0.013247	8.65469	89
CDH1	0.72228	12.4077	97
CDH11	1.10905	11.1612	97
CDH13	0.972753	13.4164	97
CDH17	0.900143	12.4648	97
CDH19	0.907975	10.9796	50
CDH2	0.000953284	-1.63985	56
CDH3	0.816412	10.8111	36
CDH5	1.66126	4.06036	39
CDHR5	0.76545	13.8998	95
CDIPT	0.734919	12.996	97
CDK1	0.640441	14.0055	97
CDK11B	0.394554	12.2916	97
CDK12	0.331947	8.89548	70
CDK13	0.609215	-16.1844	83
CDK2	0.790262	12.096	87
CDK4	0.326448	4.70659	92
CDK5	0.733301	4.43348	97
CDK5RAP1	0.356697	6.01998	32
CDK5RAP3	0.423197	12.9625	97
CDK6	0.753757	13.884	92
CDK7	0.569916	12.9382	76
CDK8	0.460592	-15.1199	31
CDK9	0.986362	8.59064	97
CDKAL1	0.587016	13.3288	82
CDKN1B	0.292357	1.82198	92
CDKN2AIP	0.640528	14.3103	97
CDKN2AIPNL	0.368713	12.3629	59
CDKN2C	0.930162	13.4603	90
CDS1	1.15279	9.91255	62
CDS2	1.09803	11.7601	97
CDV3	0.813791	8.51528	97
CDX1	0.383471	6.16053	37
CDX2	0.812392	1.83201	90
CDYL	0.309712	6.31774	61
CEACAM1	0.582883	5.92665	97
CEACAM5	0.722821	13.5484	97
CEACAM6	0.120642	8.32871	89
CEACAM7	0.413782	11.6616	97
CEACAM8	0.575794	11.501	61
CEBPB	0.590781	11.8962	74
CEBPG	1.5393	-2.54675	43
CEBPZ	0.781337	12.7417	97
CEL	0.911158	-0.0812099	37
CELA2A	0.830076	0.698576	85
CELA3A	1.60291	-11.353	90
CELA3B	0.938924	4.87101	76
CELF1	0.19574	5.29478	97
CELF2	1.06773	12.8043	97
CEMIP	1.55111	1.71748	45
CENPB	0.983753	9.63484	85
CENPC	0.432041	13.1762	73
CENPV	1.10644	10.9113	97
CENPX	0.660205	12.4659	55
CEP170	0.689994	13.9773	97
CEP170B	0.0830006	-1.30023	96
CEP41	0.0989434	10.2052	80
CEP44	1.33934	-48.4652	47
CEPT1	0.811166	13.9991	97
CERS2	7.67468	-32.4203	79
CERS6	0.45846	13.8586	97
CES1	0.885307	7.15616	97
CES2	1.10761	10.2381	97
CES3	0.612059	11.6488	97
CETN2	0.617021	-10.6204	97
CFAP20	0.429017	12.6269	94
CFAP36	0.901935	11.4537	54
CFB	1.07673	11.9408	97
CFD	0.851123	13.4027	97
CFDP1	0.338688	13.4556	88
CFH	0.434859	13.6918	97
CFHR1	0.913691	13.6474	97
CFHR2	0.519701	13.6185	80
CFHR3	0.402389	13.3774	80
CFHR5	0.617355	12.7809	97
CFI	0.322511	9.59059	97
CFL1	0.865549	-0.741844	97
CFL2	1.14499	-0.947983	97
CFP	0.799443	13.7302	97
CGGBP1	0.223412	-18.7893	97
CGN	0.79634	13.1799	97
CGREF1	1.22657	10.7868	64
CHAF1B	0.885325	-1.67089	32
CHAMP1	0.491061	14.0747	97
CHCHD1	1.03406	7.55972	40
CHCHD10	0.485113	12.7002	97
CHCHD2	0.549522	13.8106	97
CHCHD3	0.68523	14.6534	97
CHCHD4	0.260848	10.5907	95
CHCHD6	0.0438625	4.92489	97
CHCHD7	0.924257	10.1756	47
CHD1	0.533122	9.10724	74
CHD1L	0.625373	11.5877	89
CHD2	0.104269	6.71841	79
CHD3	0.0252133	-19.8794	90
CHD4	0.889822	14.1095	97
CHD8	0.75209	-53.8614	57
CHDH	0.746976	14.3372	97
CHEK2	0.703464	7.69051	72
CHERP	0.883232	14.2749	97
CHGA	0.707511	4.56372	97
CHGB	0.697664	10.4764	37
CHI3L1	0.205271	1.53497	62
CHID1	0.982341	11.3264	97
CHKB	0.000619426	-9.77976	87
CHL1	0.166132	0.0913348	97
CHM	0.90756	12.4403	73
CHMP1A	0.567374	13.3842	97
CHMP1B	0.798387	-2.61404	97
CHMP2A	1.07708	12.4257	97
CHMP2B	0.123337	1.44826	97
CHMP3	0.965193	5.35178	97
CHMP4A	0.817007	10.2732	97
CHMP4B	0.940054	11.1356	97
CHMP4C	0.58718	12.5388	65
CHMP5	0.436053	4.98852	97
CHMP6	0.340878	10.8146	97
CHMP7	0.40564	13.4475	97
CHORDC1	0.470316	14.0834	97
CHP1	0.118698	9.15733	97
CHP2	0.211655	3.56582	54
CHPF2	0.140062	9.19255	55
CHRAC1	0.455817	13.4256	79
CHST5	0.852925	7.20369	61
CHTF18	0.646	9.67184	50
CHTOP	0.504961	8.38516	97
CHUK	0.546711	4.88317	97
CIAO1	0.641989	6.32616	97
CIAPIN1	0.901447	13.4905	97
CIB1	0.707367	1.81836	97
CILP	0.37254	3.11204	97
CIR1	0.119471	6.35552	44
CIRBP	0.885525	12.7569	97
CISD1	0.755469	14.0772	97
CISD2	0.53464	11.6057	97
CISD3	0.196105	8.48118	97
CIZ1	0.84545	5.56623	73
CKAP4	0.574165	13.0108	97
CKAP5	0.166752	3.00555	97
CKB	1.28918	2.38771	97
CKMT1A	0.94545	13.5254	97
CKMT2	1.31804	-10.6273	86
CLASP1	0.474721	9.31831	97
CLASP2	0.919683	-18.5898	97
CLASRP	0.396999	6.40584	51
CLC	1.16145	10.0338	97
CLCA1	1.01797	-2.75644	97
CLCA4	1.03373	12.2367	86
CLCC1	0.160503	-4.17428	97
CLCN3	0.839172	9.38929	88
CLCN7	0.171067	4.26739	36
CLDN3	1.01114	11.4553	97
CLDN4	0.499687	12.0017	71
CLDN7	0.584167	6.82134	97
CLEC11A	1.22667	9.45999	51
CLEC16A	0.738359	12.7744	56
CLEC3B	1.53864	-0.789739	97
CLGN	2.15854	-6.95548	55
CLIC1	0.657323	12.1195	97
CLIC2	0.726814	14.3145	97
CLIC3	1.02302	5.39384	31
CLIC4	1.05657	10.8651	97
CLIC5	1.04186	11.4508	97
CLIC6	0.586778	14.0735	95
CLINT1	0.75483	13.7697	97
CLIP1	0.631036	11.5399	97
CLIP2	1.20815	12.0401	97
CLMN	0.769435	9.92851	97
CLN5	0.797788	7.67613	97
CLN6	1.02424	11.8445	61
CLNS1A	0.0580434	4.83509	94
CLP 1	0.15851	5.26513	88
CLPB	0.205835	6.11608	97
CLPP	0.709237	13.7809	97
CLPTM1	0.443596	12.1773	97
CLPTM1L	0.631567	13.7726	97
CLPX	0.840829	13.2089	97
CLRN3	0.281333	3.45182	71
CLSTN1	0.680307	8.02737	73
CLTA	9.36831	-49.3072	97
CLTB	0.613173	14.4556	97
CLTC	0.823373	13.1722	97
CLTCL1	1.02479	12.1778	92
CLU	0.531898	9.08269	97
CLUH	1.2423	-0.660344	97
CLYBL	0.504395	-5.2414	97
CMA1	1.18568	7.86373	97
CMAS	0.538981	10.1279	97
CMBL	0.852683	13.8238	97
CMC1	1.09227	10.6914	93
CMC2	0.213093	9.01552	97
CMC4	0.941995	10.9818	59
CMIP	0.416894	9.05995	73
CMPK1	0.808695	13.7016	97
CMPK2	1.30107	12.7591	96
CMSS1	0.698525	13.1145	72
CMTM4	0.73304	12.1865	88
CMTM6	0.536764	12.1877	61
CMTR1	0.129356	-7.80674	97
CNBP	0.769155	-7.50189	97
CNDP2	1.09022	5.16312	97
CNIH4	0.86014	14.8523	97
CNN1	1.27562	4.37554	97
CNN2	0.798259	7.43726	97
CNN3	0.985897	12.9683	97
CNNM3	0.168157	-2.28693	87
CNNM4	0.826343	11.1661	97
CNOT1	0.107572	7.9679	97
CNOT10	0.217523	9.12613	97
CNOT11	0.736449	7.02033	97
CNOT2	0.192596	8.82996	89
CNOT3	0.000448402	1.14588	97
CNOT4	0.370889	-3.62146	65
CNOT7	0.0753285	5.60918	70
CNOT9	0.633297	2.17568	97
CNP	0.682641	9.64493	97
CNPY2	0.965414	12.5836	97
CNPY3	0.755388	11.8035	97
CNPY4	0.79154	10.551	63
CNRIP1	5.08554	-11.542	72
CNTN1	0.901588	5.48477	49
COA3	1.02676	12.0372	97
COA4	0.751024	6.39723	90
COA5	0.683349	14.0906	95
COA6	0.497951	13.6247	97
COA7	0.621252	13.8689	97
COASY	0.131263	6.3139	97
COBL	0.886567	12.5343	60
COBLL1	0.593651	3.76484	94
COG1	0.73002	13.9821	97
COG2	0.926052	12.6415	97
COG3	0.906908	13.5965	97
COG4	1.0603	10.2815	97
COG5	0.670909	14.5681	97
COG6	1.08757	9.17343	97
COG7	0.598363	12.9768	97
COG8	0.249313	-0.72261	97
COIL	0.729264	12.624	97
COL10A1	1.2099	7.99459	93
COL11A1	0.918008	13.3832	93
COL12A1	0.398864	9.9668	97
COL14A1	1.35365	5.31277	97
COL15A1	0.864325	10.4118	97
COL16A1	1.12227	11.5743	97
COL17A1	0.50589	11.8274	73
COL18A1	1.1689	10.0227	97
COL1A1	1.51733	-8.55316	97
COL1A2	1.56377	-7.82586	97
COL21A1	0.784043	12.5626	90
COL28A1	0.819501	5.24294	97
COL2A1	0.935933	12.2161	65
COL3A1	1.46598	-2.10764	97
COL4A1	1.06197	12.2442	97
COL4A2	1.0269	11.6925	97
COL4A3BP	0.866776	13.5574	97
COL4A5	0.81546	2.44068	37
COL5A1	0.85612	13.0982	97
COL5A2	1.14461	10.3153	97
COL5A3	1.01191	10.3548	97
COL6A1	1.58436	1.90525	97
COL6A2	1.30864	7.12393	97
COL6A3	1.43196	4.98349	97
COL7A1	0.56868	4.93184	91
COL8A1	1.30006	7.52424	90
COLEC12	1.29566	7.10955	87
COLGALT1	0.271983	8.16367	97
COMMD1	0.424297	6.68052	97
COMMD10	0.489894	9.54904	68
COMMD2	1.07117	-0.0344896	60
COMMD3	0.367848	8.05383	83
COMMD3-BMI1	0.652477	10.9453	77
COMMD4	0.215186	5.38307	97
COMMD5	0.369812	8.92222	88
COMMD6	1.09426	4.59331	97
COMMD7	0.0182772	-9.13482	86
COMMD8	0.000242197	-8.35048	97
COMMD9	0.744989	-21.9978	97
COMP	0.559263	13.7423	95
COMT	0.965806	3.83172	97
COMTD1	0.136085	-16.5065	97
COPA	0.693683	13.0125	97
COPB1	0.855258	13.1453	97
COPB2	0.637945	14.3569	97
COPE	0.0882091	5.44628	97
COPG1	0.679298	13.7886	97
COPG2	0.746524	10.4467	97
COPS2	1.0238	12.3339	97
COPS3	0.130172	4.90457	97
COPS4	1.09679	8.29178	97
COPS5	0.529816	14.0558	97
COPS6	0.508787	2.04013	97
COPS7A	0.73044	13.997	97
COPS7B	0.0943227	6.14592	97
COPS8	0.281387	9.13928	97
COPZ1	0.544292	13.7403	97
COPZ2	0.419344	11.2858	97
COQ10B	0.75707	12.6721	79
COQ3	0.515302	13.9775	97
COQ5	1.04408	12.479	97
COQ6	0.301221	10.7129	97
COQ7	0.718862	12.4218	97
COQ8A	0.644123	11.4805	97
COQ8B	0.541464	14.2168	93
COQ9	0.904965	13.5715	97
CORO1A	0.498604	9.21618	97
CORO1B	0.889772	13.3064	97
CORO1C	0.938053	-4.95978	97
CORO2A	0.913735	10.8267	97
CORO2B	0.747158	11.4406	47
CORO7-PAM16	0.47033	14.1027	97
COTL1	1.01913	10.0636	97
COX11	0.354532	5.08634	69
COX15	0.553848	12.0196	97
COX17	1.13887	7.88228	97
COX18	1.07805	9.33515	43
COX19	0.422107	11.4995	76
COX20	0.53955	7.87182	93
COX4I1	0.757719	12.2988	97
COX5A	0.765489	12.8703	97
COX5B	0.407245	11.2197	97
COX6A1	0.73329	12.4004	97
COX6B1	0.6347	10.8963	97
COX6C	0.593587	13.8152	97
COX7A1	0.712422	11.4995	44
COX7A2	0.10377	5.08824	97
COX7A2L	0.941456	10.927	97
COX7B	0.310193	13.8403	97
COX7C	0.750931	12.9414	97
COX8A	0.770217	11.1658	97
CP	1.29793	5.96061	97
CPA1	0.500779	-5.65317	46
CPA3	1.11694	8.06951	97
CPA6	1.44439	8.12065	36
CPB1	0.581628	2.90252	69
CPB2	0.524094	13.5062	97
CPD	0.65466	14.1849	97
CPM	0.555921	14.1209	97
CPN1	0.614967	13.6165	87
CPN2	1.06426	12.8128	97
CPNE1	0.56301	9.24421	97
CPNE2	0.408827	13.5278	91
CPNE3	0.351477	-4.18641	97
CPO	0.702254	9.48034	45
CPOX	0.48034	3.46093	97
CPPED1	1.0305	7.2924	97
CPQ	0.78773	12.824	65
CPS1	1.01223	-5.39681	97
CPSF1	0.439025	7.13207	97
CPSF2	0.00450312	8.66958	97
CPSF3	0.750109	12.9731	97
CPSF4	1.14135	-31.538	97
CPSF6	0.614736	13.6256	97
CPSF7	0.840967	14.0643	97
CPT1A	1.43961	1.29032	97
CPT2	0.879439	12.5675	97
CPTP	1.17048	8.91847	30
CPVL	1.13727	9.53116	97
CPXM2	0.445312	9.82842	36
CPZ	0.887658	-0.131718	47
CR2	1.54706	6.46985	46
CRABP1	0.570735	12.9183	66
CRABP2	0.615281	10.3354	60
CRACR2A	0.0326082	-16.4473	85
CRADD	0.140731	7.73542	97
CRAT	0.325123	-17.718	97
CRBN	0.420391	-30.2039	97
CRCP	0.996285	9.94404	37
CREB1	0.0897424	8.4474	97
CREBBP	0.176968	5.74153	65
CREG1	0.609307	8.95223	42
CRELD1	0.4801	12.2721	97
CRELD2	1.06899	9.43747	97
CRIP1	0.793366	4.25515	97
CRIP2	1.0595	11.4331	97
CRISP3	1.03235	10.2142	68
CRISPLD2	0.0412816	7.15818	41
CRK	1.07288	4.35401	97
CRKL	0.217777	5.91057	97
CRLF3	0.857858	6.79528	97
CRMP1	0.677453	14.1579	97
CRNKL1	0.489819	7.54524	97
CROCC	0.0992714	4.0385	93
CROT	0.838739	13.4237	93
CRP	1.00936	9.56744	92
CRTAC1	0.755515	11.7774	48
CRTAP	0.65714	14.5349	97
CRTC1	0.57814	2.47663	43
CRTC3	0.946376	12.6604	63
CRYAB	1.0548	9.95015	97
CRYL1	0.548119	-0.962849	97
CRYM	0.849254	-0.925428	85
CRYZ	0.0630513	8.04968	97
CRYZL1	0.644628	14.2548	97
CS	0.416148	13.1389	97
CSDE1	0.558058	10.3481	97
CSE1L	1.06036	10.9986	97
CSF1R	1.11882	6.38876	50
CSK	1.20137	10.3582	97
CSNK1A1	0.554616	12.5449	97
CSNK1D	0.738553	9.0089	60
CSNK1G3	0.252892	-1.34285	56
CSNK2A1	0.894687	11.3268	97
CSNK2A2	0.820166	9.09428	97
CSNK2B	0.614704	13.9013	97
CSPG4	0.673261	9.19646	97
CSRP1	1.20756	4.58571	97
CSRP2	0.660045	11.2547	97
CSRP3	1.13576	9.11669	90
CST3	0.239447	3.68914	97
CSTA	1.33536	6.64094	36
CSTB	0.706231	12.8586	97
CSTF1	0.739017	14.3349	97
CSTF2	0.522034	14.2966	97
CSTF2T	0.307367	7.00331	79
CSTF3	0.673899	13.7805	97
CTBP1	1.16065	-9.41022	97
CTBP2	0.545048	14.0245	97
CTBS	0.581846	5.92408	88
CTCF	0.67343	14.5085	97
CTDP1	0.756029	14.2351	89
CTDSP1	0.762622	12.9713	72
CTDSPL2	6.33823	-20.8951	81
CTGF	1.12853	9.50346	35
CTH	0.631599	1.95613	92
CTHRC1	0.913482	12.9012	97
CTIF	1.22824	8.78594	54
CTNNA1	1.01753	12.9089	97
CTNNA2	1.07838	0.756246	36
CTNNAL1	0.694483	10.3674	31
CTNNB1	0.887186	13.8786	97
CTNNBL1	0.927847	5.19804	97
CTNND1	0.203127	-11.1937	97
CTPS1	0.879365	13.1718	97
CTPS2	1.12914	11.1522	97
CTR9	1.02304	-9.8179	97
CTRC	0.435818	7.62993	69
CTSA	0.618484	8.60229	97
CTSB	1.12104	9.72242	97
CTSC	0.925356	13.1326	97
CTSD	0.64658	1.52074	97
CTSE	1.86366	-6.61085	41
CTSG	0.571628	12.2674	97
CTSH	0.713276	13.9267	97
CTSK	0.651172	13.1775	83
CTSL	0.736789	12.9189	97
CTSS	0.751315	11.9344	97
CTSZ	0.96219	1.41693	97
CTTN	0.900155	11.5824	97
CTTNBP2NL	0.0275992	-4.48533	97
CTU2	0.406132	-3.16078	92
CUEDC1	0.473053	10.0696	49
CUL1	1.169	10.3276	97
CUL2	0.762389	10.7603	97
CUL3	0.778902	12.1643	97
CUL4A	0.512545	5.40977	97
CUL4B	0.665566	13.7798	97
CUL5	0.67319	13.7135	97
CUTA	0.915658	13.2521	97
CUTC	0.492976	10.2059	70
CUX1	0.690795	14.1819	97
CWC15	0.707599	1.95115	97
CWC22	0.378356	13.5238	92
CWC25	1.18949	7.47283	74
CWC27	0.228644	-10.0835	83
CWF19L1	0.567323	-11.702	97
CXADR	6.20133	-20.1642	97
CXCL12	0.884471	11.4141	87
CXCL14	1.33507	7.52488	72
CXCL8	4.65079	-13.2873	33
CXXC1	0.599548	7.9992	66
CXorf38	0.469442	13.94	91
CXorf56	0.148651	-29.1114	92
CYB5A	1.00544	11.5299	97
CYB5B	0.809545	6.53249	97
CYB5R1	0.749465	13.796	97
CYB5R2	1.07869	12.1994	92
CYB5R3	0.72633	14.0346	97
CYB5R4	0.560186	9.73842	55
CYBA	0.403898	6.57777	97
CYBB	0.652644	11.0944	97
CYBRD1	0.770627	7.61209	96
CYC1	0.822326	6.97481	97
CYCS	1.1536	11.242	97
CYFIP1	0.765364	13.9351	97
CYFIP2	0.127514	-6.98972	93
CYGB	0.615899	14.4612	97
CYHR1	1.14199	9.62164	53
CYLD	0.236541	3.16176	51
CYP20A1	0.502689	14.1657	97
CYP27A1	0.478722	13.3421	97
CYP2S1	0.613174	6.67663	97
CYP2W1	0.854528	-5.97669	36
CYP3A5	1.37645	-3.1494	40
CYP4F11	1.89493	4.719	46
CYP4F12	0.810484	4.89354	71
CYP4F3	0.448862	3.85253	41
CYP51A1	0.948863	13.1124	97
CYP7B1	0.710984	13.7636	84
CYR61	0.278624	10.7368	80
CYSTM1	1.8443	3.09276	39
CYTH1	0.60668	-7.26917	44
CYTH2	1.19849	8.74288	31
D2HGDH	0.674803	-5.41575	91
DAAM1	0.69575	12.4513	58
DAB2	0.888021	13.5365	97
DAB2IP	0.0314896	3.55911	94
DACH1	0.55526	5.23434	50
DAD1	0.768934	12.3309	97
DAG1	0.860942	3.63788	97
DAGLB	0.246186	-35.0844	75
DAP	0.152926	-5.77075	97
DAP3	0.462127	12.7194	97
DAPK2	1.0558	9.38208	97
DAPK3	0.61153	13.8647	97
DARS	0.65701	8.56797	97
DARS2	0.650108	10.3108	97
DAXX	0.381415	12.8891	79
DAZAP1	0.202474	5.54516	97
DAZAP2	0.103016	4.53831	69
DBI	1.07423	-12.6069	97
DBN1	0.748543	12.1671	97
DBNL	0.889198	13.9707	97
DBR1	0.695189	14.1156	97
DBT	0.575767	10.3624	97
DCAF1	0.835237	13.243	94
DCAF11	0.15349	-10.7434	73
DCAF13	0.0728039	3.58355	97
DCAF7	0.355123	9.72584	97
DCAF8	0.102478	-35.2591	97
DCAKD	0.34419	5.89284	92
DCK	0.822262	13.9223	96
DCLK1	0.641567	13.5247	97
DCN	1.31454	3.23021	97
DCP1A	0.241838	7.75412	97
DCP1B	0.852981	7.98491	86
DCPS	0.674238	14.1946	97
DCTD	0.759213	10.9008	97
DCTN1	0.715184	13.8101	97
DCTN2	0.81672	12.9422	97
DCTN3	0.310587	9.92104	97
DCTN4	0.800606	14.1922	97
DCTN5	0.752071	-7.45434	97
DCTN6	0.53122	14.1792	97
DCTPP1	1.1397	10.6683	97
DCUN1D1	0.0183416	-12.2898	97
DCUN1D3	0.773064	13.5478	75
DCUN1D5	0.562931	13.1682	80
DCXR	0.622538	8.33812	97
DDA1	0.780477	10.534	62
DDAH1	1.03053	12.7372	97
DDAH2	0.955969	12.842	97
DDB1	1.26069	7.98483	97
DDB2	0.75775	9.25406	97
DDC	0.697996	13.4321	92
DDHD2	0.234814	8.76408	72
DDI2	0.684376	12.1527	97
DDOST	1.0208	7.31313	97
DDR1	0.468096	13.2575	85
DDRGK1	1.54723	7.38693	97
DDT	0.621082	8.54794	97
DDX1	0.526395	13.3481	97
DDX10	0.304662	-44.7736	91
DDX17	0.61228	13.3656	97
DDX18	0.562563	9.0643	97
DDX19A	0.494421	11.4883	97
DDX19B	0.469871	13.9743	97
DDX20	0.484781	13.5866	93
DDX21	0.459318	13.818	97
DDX23	0.34529	14.0856	97
DDX24	0.361149	5.29494	97
DDX27	1.24988	5.21287	97
DDX28	0.634061	12.3635	97
DDX31	0.172838	6.1395	69
DDX39A	0.704438	11.4491	97
DDX39B	0.653655	13.8434	97
DDX3X	0.438564	11.8018	97
DDX3Y	2.23025	-26.5153	75
DDX41	0.810751	13.9496	95
DDX42	0.997866	11.9096	97
DDX46	0.1863	10.1052	97
DDX47	0.715943	6.02574	97
DDX49	0.818873	13.1978	87
DDX5	0.180972	8.25487	97
DDX50	0.6013	12.3211	97
DDX51	0.00633039	0.564921	92
DDX52	0.568056	13.0209	97
DDX54	0.388133	-6.03849	97
DDX55	1.18768	8.03269	72
DDX56	0.403066	12.3635	97
DDX58	0.156754	9.35329	97
DDX6	0.776454	12.8139	97
DDX60	0.700591	9.40657	97
DECR1	0.577407	11.0696	97
DECR2	0.785923	11.9922	97
DEF6	0.48562	9.53329	97
DEFA1B	0.696375	13.4342	88
DEFA3	1.05735	11.7907	91
DEFA4	0.403362	14.1489	97
DEFA5	0.401651	4.90226	87
DEFA6	1.53055	0.627724	97
DEGS1	0.767992	10.7883	33
DEK	0.77096	13.7249	97
DENND1A	0.917429	8.42171	50
DENND2D	0.571677	4.96968	97
DENND3	0.792061	12.4873	79
DENND4C	0.688941	-6.49238	97
DENND6A	1.13851	7.91955	48
DENR	0.304936	7.83268	97
DEPTOR	0.67243	13.7481	94
DERA	0.0355239	5.46106	97
DERL1	0.523855	14.3842	97
DERL3	0.885639	11.4322	62
DES	0.823212	12.1563	97
DFFA	0.719691	12.8225	97
DFFB	0.0336965	2.30443	68
DFNA5	0.0517565	-0.670596	66
DGAT1	0.925546	5.17112	95
DGCR14	0.501724	10.1731	37
DGKA	0.534966	12.4555	97
DGKQ	0.636816	10.5233	40
DGUOK	0.188545	2.37821	80
DHCR24	1.32351	6.83603	97
DHCR7	0.825409	6.54064	97
DHFR	0.486819	11.0034	88
DHODH	0.460908	12.8609	97
DHPS	0.161574	9.17001	82
DHRS1	0.856448	11.893	97
DHRS11	0.8916	13.8296	97
DHRS3	1.21281	10.5905	81
DHRS4	0.318659	4.80149	93
DHRS4L2	0.626839	-3.54187	53
DHRS7	0.173922	7.07265	97
DHRS7B	1.00219	13.0052	97
DHRS9	0.69718	13.6971	91
DHTKD1	0.967557	12.3385	92
DHX15	0.710203	14.3252	97
DHX16	0.0888838	-0.0641932	97
DHX29	0.957559	13.2159	97
DHX30	0.626597	11.7944	97
DHX32	0.0435303	-7.09146	71
DHX33	0.772947	11.0345	38
DHX36	0.764486	13.8788	97
DHX37	0.0670393	7.23236	85
DHX38	1.03366	11.1803	97
DHX57	0.715849	11.2551	64
DHX8	0.509829	13.8059	86
DHX9	0.686438	13.5237	97
DIABLO	0.935189	8.29967	97
DIAPH1	0.57861	11.9128	97
DIAPH2	1.05208	9.14385	97
DICER1	0.140827	-0.161562	90
DIDO1	0.609615	9.36418	97
DIEXF	0.136882	5.76484	74
DIMT1	0.603434	14.2387	97
DIP2A	0.517412	7.32286	58
DIP2B	7.99156	-36.0384	97
DIP2C	0.956922	10.0864	67
DIS3	0.215851	5.12763	97
DIS3L2	1.29476	8.246	97
DKC1	0.979322	11.6748	97
DLAT	0.304787	9.76644	97
DLD	0.787497	9.83557	97
DLG1	0.66558	-0.246966	97
DLG3	0.0821829	-6.01031	89
DLG4	10.3611	-52.8625	65
DLGAP4	1.08279	9.25009	97
DLST	0.630888	10.8583	97
DMAP1	0.132765	-0.873398	87
DMBT1	0.827949	12.0514	97
DMD	1.09514	-1.05112	97
DMPK	1.18488	8.55514	58
DMTN	0.677843	10.5458	94
DNAAF5	0.786224	14.3367	97
DNAJA1	0.888165	6.39954	97
DNAJA2	0.578991	13.104	97
DNAJA3	0.673819	8.42738	97
DNAJA4	0.161437	3.58998	97
DNAJB1	0.6034	13.8266	97
DNAJB11	0.421546	12.9319	97
DNAJB12	0.272474	-10.8385	97
DNAJB14	0.784386	9.43127	66
DNAJB2	0.45151	9.90299	94
DNAJB4	1.07365	7.69118	97
DNAJB5	1.14449	3.67122	97
DNAJB6	0.46489	13.9734	97
DNAJC1	0.565622	13.0108	97
DNAJC10	0.0832576	4.12016	97
DNAJC11	0.709357	13.362	97
DNAJC13	0.382782	-1.27516	97
DNAJC15	0.167765	3.6437	49
DNAJC16	1.03315	8.09299	49
DNAJC17	0.730553	14.3387	97
DNAJC19	0.695162	12.6856	97
DNAJC2	0.987971	10.8834	97
DNAJC21	0.572555	12.4678	71
DNAJC25	0.121776	2.9979	71
DNAJC3	0.128515	6.58719	97
DNAJC30	0.734082	10.5814	62
DNAJC5	1.02489	9.506	97
DNAJC7	0.880895	10.6897	97
DNAJC8	0.93161	10.7868	97
DNAJC9	0.847245	14.5553	97
DNASE2	0.613327	12.0892	97
DNM1	0.852344	9.03062	97
DNM1L	0.683892	14.066	97
DNM2	0.599441	13.3377	97
DNM3	0.774673	-35.5782	94
DNMBP	0.265351	-12.9741	93
DNMT1	0.629028	10.9237	97
DNPEP	0.442896	14.0276	97
DNPH1	0.816643	14.2571	97
DNTTIP1	0.639576	14.4859	97
DNTTIP2	0.95282	8.47883	95
DOCK1	0.944241	12.8832	97
DOCK10	0.861466	12.7037	89
DOCK11	0.747451	12.5633	97
DOCK2	0.798795	13.6153	97
DOCK5	0.597217	12.9316	93
DOCK6	0.110151	3.90838	97
DOCK7	0.51507	13.9613	97
DOCK8	0.833464	13.2925	89
DOCK9	0.86249	9.15896	97
DOHH	0.520312	13.369	91
DOK1	0.206971	9.04448	97
DOK2	0.568992	13.731	84
DOK3	0.719519	11.4604	53
DOLPP1	0.943497	9.79799	73
DOPEY2	0.0369999	9.15074	97
DPAGT1	0.466101	11.4794	97
DPCD	1.14806	10.7284	64
DPEP1	0.827013	8.31009	97
DPF2	0.112044	8.33918	97
DPH1	1.024	10.0591	56
DPH2	0.125581	-1.86918	88
DPH5	0.710419	10.2287	36
DPM1	0.152949	6.74779	97
DPM3	1.01162	12.1818	97
DPP3	0.927474	12.0235	97
DPP4	1.08185	-1.17287	91
DPP7	0.117549	9.33114	97
DPP9	0.504628	10.4801	97
DPT	0.954286	12.6698	97
DPY19L1	1.25112	8.9882	56
DPY30	7.91309	-36.0617	97
DPYD	1.46258	3.24914	97
DPYSL2	0.820647	14.1717	97
DPYSL3	1.55377	0.89769	97
DPYSL4	1.65872	2.50811	50
DR1	0.500644	0.688381	97
DRAP1	0.70123	9.55257	97
DRG1	0.520487	13.9927	97
DRG2	1.01386	13.0584	97
DSC2	0.999348	11.8829	97
DSCC1	0.826584	12.0181	64
DSCR3	0.661086	13.8466	86
DSG2	1.17903	10.89	97
DSN1	0.571559	12.2505	54
DSP	0.897958	1.09907	97
DST	0.420254	13.802	97
DSTN	1.25874	1.8302	97
DTD1	0.473753	8.3165	84
DTNA	0.802826	9.83124	97
DTNBP1	0.0880036	-6.50974	93
DTWD2	0.637739	11.212	44
DTX3L	0.349428	2.58299	97
DTYMK	0.649437	11.9305	97
DUOX2	1.06022	10.4602	79
DUS1L	0.894303	11.1894	48
DUS2	0.29173	9.42226	81
DUS3L	7.87029	-34.575	89
DUSP11	0.566864	-2.20081	35
DUSP12	0.391978	6.45104	64
DUSP22	0.704427	11.2659	46
DUSP23	0.106367	4.39137	97
DUSP3	0.773016	0.00609901	97
DUT	0.893872	10.7505	97
DVL2	0.559786	11.986	53
DVL3	0.491444	10.744	49
DYM	5.70979	-30.9489	90
DYNC1H1	0.96857	13.0079	97
DYNC1I1	2.15335	-5.97251	45
DYNC1I2	0.937026	6.05701	97
DYNC1LI1	0.726445	12.3938	97
DYNC1LI2	0.692992	14.1183	97
DYNLL1	0.670655	4.53139	97
DYNLL2	0.0084561	3.85171	97
DYNLRB1	0.883186	2.95483	97
DYNLT1	0.646444	14.117	97
DYNLT3	0.490873	11.7336	74
DYRK1A	0.944023	11.8018	62
DYSF	0.165376	3.26791	97
E2F4	0.459255	5.5144	78
EAPP	0.986538	2.83454	40
EARS2	0.514282	12.6959	97
EBAG9	0.720821	10.1723	59
EBNA1BP2	0.942031	6.06919	97
EBP	1.02916	10.7895	57
ECE1	0.975615	11.3437	97
ECH1	0.121043	5.16733	97
ECHDC1	0.400357	14.178	97
ECHDC2	1.00426	11.1805	51
ECHDC3	0.0457783	4.6497	77
ECHS1	0.438235	14.134	97
ECI1	0.464975	13.7977	97
ECI2	1.10022	10.3184	97
ECM1	1.19927	9.01169	97
ECSIT	0.789447	13.5658	97
ECT2	1.10332	-0.0612862	69
EDC3	0.710223	9.81847	97
EDC4	0.61082	11.1199	97
EDEM3	0.126888	-16.8292	73
EDF1	0.821504	13.7089	97
EEA1	0.819073	13.0864	97
EED	1.29045	7.44859	90
EEF1A1	0.817131	6.58779	97
EEF1A2	1.23057	9.19217	97
EEF1B2	0.578138	14.0386	97
EEF1D	0.878543	14.5427	97
EEF1E1	0.6007	13.0392	97
EEF1G	0.478843	13.2616	97
EEF2	0.514171	12.7422	97
EEF2K	0.497246	12.8788	69
EEFSEC	0.869435	13.2231	97
EEPD1	0.592258	13.8588	97
EFEMP1	0.902147	13.2732	97
EFEMP2	0.775498	14.3269	97
EFHD1	0.670109	10.5955	41
EFHD2	0.736548	10.3288	97
EFL1	0.9745	11.2434	97
EFNA5	0.60368	12.6236	61
EFNB1	0.429086	1.85751	89
EFNB2	0.227965	-13.7825	97
EFR3A	0.456297	13.993	97
EFTUD2	0.018049	5.46751	97
EGFL7	1.25019	8.53992	51
EGFR	0.269622	-10.683	97
EGLN1	0.724882	9.33127	93
EHBP1	1.33088	7.18244	49
EHBP1L1	0.992407	9.55058	97
EHD1	0.936271	11.5446	97
EHD2	1.25915	3.30266	97
EHD3	0.152717	4.51042	94
EHD4	0.208179	-16.9592	97
EHHADH	0.941452	4.51683	97
EHMT1	5.93933	-17.6893	83
EHMT2	1.013	11.1992	57
EI24	0.508208	13.918	86
EIF1	0.792525	6.86912	97
EIF1AD	0.306845	-3.11563	54
EIF1AX	0.558006	10.2854	94
EIF1AY	1.96287	-5.88147	54
EIF1B	0.174142	-10.3798	69
EIF2A	0.709261	12.6178	97
EIF2AK2	0.631095	11.9183	97
EIF2B1	0.151603	6.86081	97
EIF2B2	0.589792	10.3967	97
EIF2B3	0.990249	12.4103	97
EIF2B4	0.146348	-13.6132	97
EIF2B5	0.154766	7.44658	97
EIF2D	0.0263646	8.87534	97
EIF2S1	0.848027	12.8275	97
EIF2S2	0.602565	12.3496	97
EIF2S3	0.796604	10.0901	97
EIF3A	0.843455	13.3584	97
EIF3B	0.789187	13.5424	97
EIF3C	0.722566	14.0303	97
EIF3D	0.610317	11.046	97
EIF3E	0.63917	12.5377	97
EIF3F	1.10459	11.811	97
EIF3G	0.617349	8.16413	97
EIF3H	0.831118	10.5465	97
EIF3I	0.714231	11.2612	97
EIF3J	0.480718	14.285	97
EIF3K	0.319151	14.1675	97
EIF3L	0.837476	13.6218	97
EIF3M	0.106858	-1.07629	97
EIF4A1	1.03159	12.2543	97
EIF4A2	0.595333	2.93667	97
EIF4A3	0.673003	14.4145	97
EIF4B	0.562315	13.8854	97
EIF4E	0.710859	14.0928	97
EIF4E2	0.854413	13.9387	97
EIF4E3	1.76618	4.70243	46
EIF4EBP1	1.00822	10.612	46
EIF4EBP2	0.54898	12.6525	62
EIF4ENIF1	0.0311603	8.72328	73
EIF4G1	0.919566	5.73666	97
EIF4G2	0.629196	9.7092	97
EIF4G3	0.921432	-30.1787	95
EIF4H	0.703142	14.0102	97
EIF5	0.546447	13.953	97
EIF5A	0.811115	6.86448	97
EIF5B	0.0259879	8.32313	97
EIF6	1.01231	11.4231	97
ELAC2	0.623213	12.9041	97
ELANE	0.947102	13.1016	97
ELAVL1	0.500144	13.8952	97
ELF1	0.171634	4.3111	92
ELF3	0.837488	12.7991	65
ELMO1	0.683387	14.2932	97
ELMO2	0.731455	13.7799	97
ELMO3	1.30268	7.84147	97
ELMOD2	0.263765	-4.9902	97
ELMSAN1	0.658173	8.89126	81
ELN	1.49469	0.461442	97
ELOA	0.452479	2.62175	86
ELOB	0.757976	14.1882	97
ELOC	0.111137	7.80243	97
ELOF1	0.641371	-9.17194	85
ELOVL1	0.350604	-3.59506	97
ELP2	0.32312	13.8251	90
ELP3	0.730533	13.4767	92
ELP4	0.253733	9.10666	89
ELP6	0.594534	12.8742	65
EMB	0.872823	10.0684	31
EMC1	0.175321	7.20836	97
EMC10	0.919632	13.125	92
EMC2	0.906831	12.6104	97
EMC3	0.374591	13.4497	87
EMC4	0.994174	9.88918	97
EMC6	2.70844	-26.7601	89
EMC7	0.710329	11.5942	97
EMC8	9.56812	-50.9055	97
EMD	0.947438	13.2543	97
EMG1	0.459996	10.9794	97
EMILIN1	0.838301	11.6225	97
EMILIN2	0.763282	14.3292	97
EMILIN3	0.86939	10.5244	39
EML1	0.982209	5.84326	97
EML2	0.484513	-7.82968	97
EML3	0.226448	7.91555	97
EML4	0.622009	14.081	97
ENAH	0.359433	11.8868	97
ENDOD1	0.848455	9.66433	97
ENDOG	0.0804749	8.21911	97
ENG	0.651878	14.1732	93
ENGASE	0.463782	13.4965	97
ENO1	0.0278435	4.63922	97
ENO2	1.0908	8.05842	97
ENO3	0.84126	-16.3508	97
ENOPH1	0.744334	13.0305	97
ENOSF1	0.612462	14.0112	88
ENPEP	0.860441	11.6871	49
ENPP1	0.548989	3.76936	46
ENPP4	1.06862	4.59394	93
ENSA	0.64261	10.9617	97
ENTPD1	0.854449	12.4069	97
ENTPD2	0.568047	12.1928	69
ENTPD5	1.26522	8.96275	97
ENY2	0.620548	13.4585	91
EOGT	7.06623	-27.4158	97
EP300	1.15495	5.95908	77
EPB41	0.266279	3.25912	97
EPB41L1	1.11564	10.9158	97
EPB41L2	0.730925	13.7728	97
EPB41L3	1.10292	11.2556	97
EPB41L4B	0.65667	14.1534	97
EPB41L5	0.574702	13.9371	97
EPB42	0.521829	8.88381	97
EPCAM	1.01453	12.0289	97
EPHA2	0.681827	-11.5946	87
EPHB2	0.821129	12.2183	97
EPHB3	0.994261	6.16203	94
EPHB4	0.171443	7.78612	92
EPHX1	0.0827789	9.13876	97
EPHX2	0.440309	2.82716	97
EPM2A	1.33837	4.85922	73
EPM2AIP1	0.751715	-0.194202	61
EPN1	0.481424	14.2701	97
EPN2	0.664374	11.9177	55
EPN3	0.748827	11.0668	38
EPPK1	0.872667	7.79032	97
EPRS	0.306234	-4.34197	97
EPS15	0.474272	9.2783	97
EPS15L1	0.6293	8.21948	97
EPS8	0.68543	6.90833	97
EPS8L1	0.671416	9.79983	83
[truncated: 5,134 more rows]

## Sheet: CPTAC_GBM_T
	BI_mean	bic_diff_mean	N
A1BG	0.748665	12.8088	99
A2M	1.09564	9.27466	99
AAAS	0.895487	10.9638	99
AACS	0.99286	11.1657	99
AADAT	0.248247	7.39228	82
AAED1	1.0053	11.0146	80
AAGAB	1.08917	11.9172	99
AAK1	1.07275	7.41011	99
AAMDC	0.418363	7.01303	99
AAMP	0.728376	13.5035	99
AAR2	0.745187	14.356	99
AARS	0.822851	12.8237	99
AARS2	1.16957	10.3793	99
AARSD1	0.432109	13.8536	99
AASDHPPT	0.0749521	8.34822	99
AASS	0.937286	12.2668	99
AATF	1.10047	4.0318	99
AATK	0.734525	14.777	99
ABAT	1.21551	7.95019	99
ABCA1	0.670999	14.0334	99
ABCA2	0.593012	-1.24651	99
ABCA3	0.807078	13.8733	99
ABCA5	0.691692	13.23	99
ABCA8	0.953045	6.75685	99
ABCB1	1.23997	8.97387	99
ABCB10	0.799301	13.476	99
ABCB6	0.613699	13.9294	99
ABCB7	0.670662	10.4278	99
ABCB8	0.633289	13.4483	99
ABCB9	0.507831	7.36079	80
ABCC1	0.587781	6.50131	99
ABCC3	1.09457	2.56013	99
ABCC4	0.643312	13.8023	99
ABCD1	0.597182	4.76989	99
ABCD2	0.908361	12.6191	99
ABCD3	1.12578	10.4239	99
ABCD4	0.600605	14.2461	99
ABCE1	0.760806	13.7786	99
ABCF1	0.846905	12.559	99
ABCF2	0.281706	7.62736	99
ABCF3	0.877346	14.1719	99
ABCG1	0.888597	14.0703	99
ABCG2	1.02388	12.0186	99
ABHD10	0.893259	11.8382	99
ABHD11	0.996555	1.00566	99
ABHD12	0.750466	10.0113	99
ABHD13	0.46402	11.5108	72
ABHD14A-ACY1	0.613512	14.2794	99
ABHD14B	1.04587	10.2476	99
ABHD16A	0.987524	11.0878	99
ABHD17A	0.83236	10.8972	99
ABHD17B	0.531718	1.72166	99
ABHD17C	0.707487	14.1748	99
ABHD2	0.695534	12.171	99
ABHD3	0.856372	12.6979	99
ABHD4	1.08933	11.5793	99
ABHD5	0.742308	12.6176	99
ABHD6	0.789856	9.42331	99
ABI1	0.799946	13.4422	99
ABI2	1.0608	6.15952	99
ABI3	1.01713	7.45001	99
ABI3BP	0.918024	-3.13094	99
ABL1	1.14518	10.3315	99
ABL2	0.729379	14.2615	99
ABLIM1	0.986426	12.8581	99
ABLIM2	1.18448	4.22516	99
ABLIM3	0.543847	14.4283	99
ABR	1.17069	10.4634	99
ABRACL	0.587606	14.2025	99
ABRAXAS1	1.27024	5.5973	99
ABRAXAS2	1.04366	0.748221	99
ABT1	0.877705	11.7692	81
ACAA1	1.06292	11.4185	99
ACAA2	0.83483	14.3281	99
ACACA	0.427718	11.7029	99
ACACB	1.04959	10.7453	44
ACAD10	0.881775	7.08256	99
ACAD11	0.636064	10.9173	99
ACAD8	1.04271	10.5336	99
ACAD9	0.0432233	7.97107	99
ACADL	0.878242	9.52526	81
ACADM	0.766733	8.06931	99
ACADS	0.483176	11.138	99
ACADSB	0.757735	12.3794	99
ACADVL	0.814793	12.5985	99
ACAN	0.658024	8.5743	99
ACAP1	0.739502	9.66367	44
ACAP2	0.460706	12.2524	99
ACAP3	0.901922	4.91804	99
ACAT1	0.548711	11.5279	99
ACAT2	0.392814	13.6267	99
ACBD3	0.707634	9.54431	99
ACBD4	0.828744	12.5843	82
ACBD5	0.628324	2.73428	99
ACBD6	0.259756	6.0128	99
ACBD7	1.05366	11.1552	99
ACD	1.0515	10.2309	81
ACE	1.39176	3.35032	99
ACHE	0.757645	8.2452	99
ACIN1	0.879203	11.8106	99
ACLY	1.06822	3.50947	99
ACO1	1.04591	11.8621	99
ACO2	1.01887	12.7052	99
ACOT1	1.03718	12.1354	99
ACOT11	1.15419	10.9895	99
ACOT13	0.443709	10.2851	99
ACOT7	1.10068	10.9543	99
ACOT8	0.931978	10.5876	99
ACOT9	0.97379	7.58568	99
ACOX1	1.40341	6.00689	99
ACOX2	1.17206	9.5063	99
ACOX3	0.758061	14.1868	99
ACP1	0.615163	13.4395	99
ACP2	0.786992	8.09172	99
ACP5	0.648869	-5.80495	72
ACP6	0.646648	12.3856	99
ACPP	1.27102	2.85443	63
ACSBG1	0.921846	13.4206	99
ACSF2	0.636686	14.0471	99
ACSF3	0.756611	13.7151	99
ACSL1	1.13837	4.84527	99
ACSL3	0.871921	2.18458	99
ACSL4	0.820747	8.95391	99
ACSL5	1.1426	8.49168	99
ACSL6	1.34506	6.09135	99
ACSM5	1.4126	4.4031	62
ACSS1	0.934337	5.40984	99
ACSS2	0.720539	10.5922	99
ACSS3	0.692806	14.215	99
ACTA1	1.1593	4.98843	99
ACTB	0.69758	14.2467	99
ACTBL2	1.399	2.67659	99
ACTG1	1.45844	-5.98041	99
ACTL6A	0.472516	13.6951	99
ACTL6B	0.745735	8.6237	99
ACTN1	0.786976	14.2411	99
ACTN2	0.914115	1.42557	99
ACTN3	1.02555	7.71032	55
ACTN4	0.927425	13.012	99
ACTR10	1.18781	7.22578	99
ACTR1A	0.859897	14.0197	99
ACTR1B	1.17668	8.39755	99
ACTR2	0.436694	0.097882	99
ACTR3	0.907952	7.50751	99
ACTR3B	1.11653	8.56119	99
ACTR5	0.685008	11.206	99
ACTR6	0.724052	13.4886	99
ACTR8	0.698128	12.6218	99
ACVR1	0.879862	11.7548	99
ACVR1B	1.02564	3.40547	91
ACVR2A	0.312246	10.3554	90
ACY3	0.638586	5.64691	99
ACYP1	0.637016	14.6196	99
ACYP2	1.00908	12.5745	99
ADA	0.631869	12.9259	99
ADA2	1.43242	4.29431	99
ADAL	1.17935	10.5094	99
ADAM10	1.07749	-1.18267	99
ADAM11	1.20535	7.35365	99
ADAM12	0.288944	7.76411	61
ADAM15	0.783451	14.1131	99
ADAM17	0.89503	13.4512	99
ADAM22	1.39293	0.355683	99
ADAM23	1.308	6.21975	99
ADAM28	1.21757	7.76702	37
ADAM9	1.02035	12.8433	99
ADAMTS1	0.974669	10.1973	64
ADAMTS4	0.872486	2.54816	99
ADAMTSL2	0.324404	9.30909	90
ADAMTSL4	0.709713	14.1158	99
ADAP1	1.04489	10.3621	99
ADAP2	1.38431	-7.25898	99
ADAR	0.665737	14.363	99
ADARB1	1.08744	11.7861	99
ADAT1	1.05533	11.2967	81
ADAT2	0.770786	9.07469	55
ADAT3	0.462665	8.15924	72
ADCK1	1.09992	10.7643	99
ADCK5	0.375322	0.92542	72
ADCY1	0.976624	11.6167	99
ADCY2	0.81741	12.3173	99
ADCY3	1.18166	9.87012	99
ADCY5	1.0096	9.44455	99
ADCY6	1.05545	12.1179	99
ADCY7	1.24102	7.52932	82
ADCY8	0.883017	7.00961	99
ADCY9	0.870621	12.1764	99
ADCYAP1	0.372577	10.9103	36
ADCYAP1R1	0.737469	12.2184	99
ADD1	0.935726	13.1616	99
ADD2	1.17489	9.72618	99
ADD3	0.781859	12.6436	99
ADGRA1	0.809339	14.0457	99
ADGRB1	1.06013	11.7543	99
ADGRB2	0.644095	11.7074	99
ADGRB3	1.09006	9.78925	99
ADGRE2	0.690655	6.63263	99
ADGRE5	1.00479	12.7787	99
ADGRF5	0.938711	13.1134	99
ADGRG1	1.0105	11.2587	99
ADGRL1	1.08326	10.6283	99
ADGRL2	0.863839	4.52484	99
ADGRL3	0.716838	14.0766	99
ADGRL4	1.06432	10.6126	99
ADH1B	0.666935	4.94607	99
ADH5	1.24718	8.34005	99
ADHFE1	0.500238	7.80136	99
ADI1	0.93509	13.4114	99
ADIPOQ	0.774184	13.9483	99
ADIPOR2	1.02446	-0.13187	36
ADIRF	1.02624	11.644	99
ADK	0.783127	2.84832	99
ADM	1.41789	5.46116	99
ADNP	1.16197	3.77337	99
ADO	0.876654	13.1882	99
ADORA1	0.834894	12.7694	99
ADPGK	0.832018	9.92138	99
ADPRH	0.945623	9.35437	99
ADPRHL1	1.00732	11.7106	99
ADPRHL2	0.639085	13.6908	99
ADRM1	1.33806	5.09745	99
ADSL	0.904684	11.3228	99
ADSS	0.791067	5.56077	99
ADSSL1	0.895285	6.17859	99
AEBP1	1.13375	10.6987	99
AEBP2	0.753674	11.0328	46
AES	1.0131	12.1468	99
AFAP1	0.799474	7.95642	99
AFAP1L1	0.821355	12.1158	99
AFAP1L2	0.68655	-7.20708	99
AFDN	0.767197	12.3685	99
AFF4	0.820214	13.2902	99
AFG1L	0.929236	11.7238	99
AFG3L2	1.02742	9.14552	99
AFM	0.778532	8.3467	99
AFMID	1.35414	6.6027	35
AFTPH	0.96911	8.90164	99
AGA	0.689597	6.82064	99
AGAP1	0.849329	13.406	99
AGAP2	1.22652	4.68725	99
AGAP3	1.21861	5.94518	99
AGBL4	0.553324	8.10578	53
AGFG1	0.484602	12.6432	99
AGFG2	0.373496	12.0819	99
AGGF1	0.342164	9.36216	99
AGK	0.313614	10.7665	99
AGL	0.960171	7.51165	99
AGMAT	1.01121	12.0914	90
AGO1	0.941567	12.4783	99
AGO2	0.820073	10.21	99
AGO3	0.535132	3.12261	99
AGO4	0.02463	8.02739	81
AGPAT1	0.933932	3.64133	99
AGPAT2	1.22719	9.9452	81
AGPAT3	0.474816	13.2627	99
AGPAT4	0.914198	13.2766	99
AGPAT5	1.04799	10.9676	99
AGPS	1.15002	0.0792292	99
AGR2	1.81733	7.75625	36
AGRN	0.855914	13.9819	99
AGT	1.28558	6.399	99
AGTPBP1	0.500583	14.4432	99
AGTRAP	0.818526	13.6795	99
AHCTF1	0.889932	11.6441	99
AHCY	1.35397	0.0821746	99
AHCYL1	0.637235	12.9488	99
AHCYL2	0.159062	7.45916	99
AHDC1	0.939996	13.8234	99
AHNAK	1.05638	11.3076	99
AHNAK2	1.08703	-4.96809	99
AHR	1.24635	8.14004	99
AHSA1	0.593917	11.9221	99
AHSG	1.09344	11.41	99
AHSP	0.958303	7.80572	99
AIDA	1.22642	0.329586	99
AIF1	1.25865	7.31323	99
AIF1L	0.953945	12.9472	99
AIFM1	0.869423	3.06572	99
AIFM2	0.882966	11.6953	99
AIFM3	0.94513	5.75705	99
AIG1	0.527055	13.7273	99
AIMP1	0.922839	13.217	99
AIMP2	0.958442	12.9047	99
AIP	0.60211	14.2345	99
AJAP1	0.923751	10.7397	99
AJM1	0.750895	12.6325	99
AJUBA	1.34849	5.37435	99
AK1	1.15793	7.01559	99
AK2	0.497955	10.29	99
AK3	0.832345	13.3858	99
AK4	0.723286	13.8319	99
AK5	1.23939	5.76594	99
AK6	1.05332	9.48942	99
AKAP1	1.03501	11.5466	99
AKAP10	0.121998	6.45619	99
AKAP11	0.818089	13.0498	99
AKAP12	0.850897	13.7552	99
AKAP13	0.841525	12.0275	99
AKAP17A	1.42425	-8.01863	99
AKAP5	1.02325	6.01589	99
AKAP6	0.241957	3.4561	99
AKAP7	0.969519	12.1406	99
AKAP8	0.786964	13.3227	99
AKAP8L	0.451823	14.0346	99
AKAP9	0.77231	2.18618	99
AKIRIN2	0.357731	10.0889	35
AKR1A1	0.808523	13.3821	99
AKR1B1	0.71757	13.8024	99
AKR1B10	0.594025	0.0168048	99
AKR1C1	1.01923	-3.51301	80
AKR1C2	0.457783	9.71643	81
AKR1C3	0.667612	12.4524	99
AKR1D1	0.575704	7.27492	72
AKR7A2	1.20552	11.1668	99
AKR7A3	0.686766	13.4307	99
AKT1	1.10285	10.7974	99
AKT1S1	0.657792	14.4113	99
AKT2	0.763153	5.02555	99
AKT3	0.614108	12.1805	99
AKTIP	0.54117	12.9741	99
ALAD	1.28249	-9.74085	99
ALAS1	0.542171	12.1058	99
ALB	0.928224	13.2125	99
ALCAM	0.49737	14.2476	99
ALDH16A1	0.980101	13.1556	99
ALDH18A1	1.22592	0.935299	99
ALDH1A1	1.27453	3.37035	99
ALDH1A2	0.832159	8.87054	89
ALDH1A3	1.17731	-37.2365	99
ALDH1B1	0.948159	12.1307	99
ALDH1L1	0.646236	12.9142	99
ALDH1L2	0.564448	10.8873	99
ALDH2	1.05796	10.1687	99
ALDH3A1	0.904904	-1.65177	72
ALDH3A2	0.749259	12.0752	99
ALDH3B1	1.17713	9.55814	99
ALDH4A1	0.7232	13.7088	99
ALDH5A1	0.837507	13.9487	99
ALDH6A1	0.908259	10.9764	99
ALDH7A1	0.785712	13.0638	99
ALDH9A1	0.959234	12.1479	99
ALDOA	0.928232	6.97093	99
ALDOB	0.994381	1.41768	99
ALDOC	0.92043	13.5046	99
ALG1	0.691187	8.1762	99
ALG11	1.19695	7.96044	99
ALG12	0.66219	14.221	99
ALG13	0.960031	12.1569	99
ALG14	0.717814	14.1603	90
ALG2	1.00993	12.8168	99
ALG5	0.881318	11.8615	99
ALG6	0.621333	13.264	99
ALG8	1.3592	5.63818	99
ALG9	0.823172	13.8993	99
ALKBH1	0.927667	13.1858	90
ALKBH2	0.871603	12.7597	90
ALKBH3	0.548151	9.66981	90
ALKBH4	0.777058	13.9257	99
ALKBH5	1.05535	5.05137	99
ALKBH6	0.569256	9.43769	64
ALKBH7	0.544591	11.0405	81
ALKBH8	0.852305	9.97565	99
ALMS1	0.814751	9.85825	90
ALOX12	1.20249	-5.76027	53
ALOX15B	0.764675	4.85131	53
ALOX5	1.22871	-0.627634	99
ALOX5AP	0.750872	13.6541	99
ALPL	1.2087	0.445209	99
ALS2	1.03761	11.1067	99
ALYREF	1.02391	11.1253	99
AMACR	1.13524	10.748	99
AMBP	0.659004	13.6259	99
AMBRA1	0.68641	11.0771	99
AMD 1.00	0.857959	7.4184	90
AMDHD2	1.16718	10.5362	99
AMER2	0.616258	12.747	99
AMFR	0.892518	8.85219	99
AMIGO1	0.907564	11.8377	99
AMN1	0.878727	13.6092	99
AMOT	0.759954	13.86	99
AMOTL1	0.604601	5.41317	99
AMOTL2	1.03148	3.55144	99
AMPD2	0.992782	11.8065	99
AMPD3	1.09661	8.02502	99
AMPH	1.48332	1.19747	99
AMT	1.20212	9.77287	99
AMZ2	1.10001	11.24	99
ANAPC1	0.659216	10.4619	99
ANAPC10	0.717979	9.8912	99
ANAPC11	1.05545	12.4909	90
ANAPC13	1.57667	3.25871	73
ANAPC16	0.827631	9.89004	63
ANAPC2	1.05332	11.8547	99
ANAPC4	0.840259	11.423	99
ANAPC5	0.554602	11.9884	99
ANAPC7	0.906582	12.8307	99
ANG	0.709797	13.53	99
ANGEL1	1.24091	-4.41942	53
ANGEL2	0.936829	2.96345	99
ANGPT2	0.847086	14.4958	99
ANGPTL1	1.65352	1.25474	54
ANGPTL2	0.966063	5.54273	99
ANGPTL4	1.43328	-5.71051	99
ANK1	0.943151	3.19984	99
ANK2	0.954146	11.5932	99
ANK3	1.15703	0.112253	99
ANKFY1	0.518951	12.4872	99
ANKH	1.18859	6.21143	46
ANKHD1	0.677862	13.1484	72
ANKHD1-EIF4EBP3	0.623119	12.2054	90
ANKIB1	0.891116	12.4692	99
ANKLE2	0.116564	9.25053	99
ANKMY2	1.07489	11.3213	99
ANKRD10	0.834801	0.0865719	99
ANKRD11	1.18199	9.59743	99
ANKRD12	0.523215	4.28439	72
ANKRD13A	1.04682	10.2216	99
ANKRD13D	0.676161	7.45892	99
ANKRD16	0.781586	13.9723	99
ANKRD17	0.935745	14.0234	99
ANKRD22	0.578216	12.8365	99
ANKRD24	1.05414	10.4789	99
ANKRD27	0.5058	12.2032	99
ANKRD28	0.913357	8.27474	99
ANKRD29	1.05344	12.5226	99
ANKRD34A	0.123609	5.16327	80
ANKRD35	0.7137	12.3156	99
ANKRD39	0.828331	12.2873	99
ANKRD40	0.918388	13.0258	99
ANKRD44	0.707777	14.4716	99
ANKRD45	0.544255	8.22369	99
ANKRD46	1.1257	10.6887	99
ANKRD49	0.995171	12.8466	90
ANKRD50	0.416382	11.6699	99
ANKRD52	0.768593	10.4154	99
ANKRD54	0.97396	13.249	99
ANKRD63	1.04813	11.0432	52
ANKS1A	1.07988	11.0617	99
ANKS1B	0.810951	0.353068	99
ANKS6	0.448084	12.61	78
ANKZF1	0.883819	13.5513	99
ANLN	0.938881	-14.7907	99
ANO10	1.12376	11.1619	99
ANO6	1.17384	8.61972	99
ANO8	0.888512	13.5649	99
ANOS1	1.0974	11.7832	99
ANP32A	0.949765	8.91713	99
ANP32B	0.809307	10.8249	99
ANP32E	1.04975	10.6842	99
ANPEP	1.38925	-3.60931	99
ANTXR1	0.709719	12.814	99
ANTXR2	1.09347	11.3813	99
ANXA1	0.658372	0.742304	99
ANXA11	0.924812	13.6205	99
ANXA13	0.980109	4.99099	35
ANXA2	0.650675	6.83332	99
ANXA3	1.11133	-15.0335	99
ANXA4	1.13985	9.92434	99
ANXA5	0.594755	12.9793	99
ANXA6	0.718155	14.6312	99
ANXA7	1.79488	-4.72641	99
AOAH	1.2116	6.43829	99
AOC3	1.01828	9.54461	82
AOX1	1.48383	3.36072	81
AP1AR	0.653088	11.5522	70
AP1B1	0.816602	1.49753	99
AP1G1	0.926991	11.7632	99
AP1G2	1.06913	4.95558	99
AP1M1	0.37491	12.9303	99
AP1S1	0.137877	-5.6472	99
AP1S2	0.751278	9.03191	99
AP2A1	1.11849	7.29069	99
AP2A2	0.905557	7.12643	99
AP2B1	0.970958	5.93585	99
AP2M1	0.917025	6.16508	99
AP2S1	0.83116	6.53757	99
AP3B1	0.824794	12.323	99
AP3B2	1.22626	9.43553	99
AP3D1	0.764216	12.2746	99
AP3M1	0.873041	12.5936	99
AP3M2	0.891595	13.0129	99
AP3S1	0.806937	12.4627	99
AP3S2	0.68522	6.78951	99
AP4B1	1.03807	12.2262	99
AP4E1	0.852385	10.1951	99
AP4M1	0.951651	5.89996	99
AP4S1	0.464838	11.4274	91
AP5B1	0.837022	12.0474	99
AP5M1	0.96814	11.989	99
AP5S1	0.595115	13.6043	99
AP5Z1	0.991132	12.0228	99
APAF1	0.604567	5.54447	99
APBA1	1.49856	1.42808	99
APBA2	0.68726	13.6363	99
APBA3	0.885921	2.56865	99
APBB1	1.22933	8.66576	99
APBB1IP	1.10449	9.41719	99
APBB2	0.898066	6.69784	99
APC	1.06035	11.8193	99
APC2	0.690087	2.89301	99
APCS	0.72076	9.71458	99
APEH	0.567033	-2.07771	99
APEX1	1.39686	3.86277	99
APH1A	0.448748	11.2372	81
APH1B	0.644356	13.7449	99
API5	0.465514	13.6683	99
APIP	1.24303	7.5365	99
APLF	0.546399	4.14502	99
APLNR	0.790069	14.0871	99
APLP1	0.460214	4.14671	99
APLP2	1.1009	10.0234	99
APMAP	0.880306	11.8703	99
APOA1	0.818589	9.87153	99
APOA2	0.66745	12.3323	99
APOA4	1.21564	7.949	99
APOB	0.924167	7.45381	99
APOBEC3B	1.09927	10.0713	45
APOBEC3C	0.677379	13.966	99
APOBEC3G	0.7357	11.2212	99
APOBR	1.00063	-7.45388	99
APOC1	0.859163	12.2736	99
APOC2	1.07105	5.25546	99
APOC3	0.667734	12.9591	99
APOC4	1.2117	6.16855	99
APOD	0.837285	3.80491	99
APOE	0.972713	7.9532	99
APOF	0.817642	5.35722	99
APOH	0.733492	14.4678	99
APOL1	1.31423	6.52386	99
APOL2	0.484907	10.7034	99
APOL3	0.907443	10.2129	99
APOM	0.917812	11.7247	99
APOO	1.06814	10.3889	99
APOOL	0.672685	13.3131	99
APP	0.518434	12.7349	99
APPBP2	0.739662	9.75824	90
APPL1	1.97451	-3.46641	99
APPL2	0.761522	12.7302	99
APRT	0.541939	14.074	99
APTX	0.93754	12.3056	99
AQP1	0.784242	12.123	99
AQP4	0.998204	11.99	99
AQR	0.879274	12.1154	99
ARAF	0.745229	13.237	99
ARAP1	0.930299	12.7208	99
ARAP2	0.849219	11.4099	99
ARAP3	1.20186	4.70516	99
ARC	0.885854	11.7368	72
ARCN1	1.04367	12.0282	99
ARF1	1.34276	7.76758	55
ARF3	0.560622	13.347	80
ARF4	0.719004	14.5295	99
ARF5	0.723931	14.4768	99
ARF6	0.930536	13.6784	99
ARFGAP1	0.811339	13.9236	99
ARFGAP2	0.775266	13.8007	99
ARFGAP3	0.75671	13.7443	99
ARFGEF1	0.599844	12.5208	99
ARFGEF2	1.25535	9.57585	99
ARFGEF3	0.947965	12.8812	99
ARFIP1	0.849207	11.9311	99
ARFIP2	0.753636	13.1556	99
ARFRP1	1.03212	11.5239	99
ARG1	1.31966	-3.30204	99
ARG2	0.947799	-4.60959	89
ARGLU1	0.817323	10.3745	99
ARHGAP1	1.4676	6.19143	99
ARHGAP10	1.05683	11.3295	99
ARHGAP12	0.391388	14.2143	99
ARHGAP15	1.00312	10.5125	99
ARHGAP17	0.967275	13.0381	99
ARHGAP18	1.20532	7.97944	99
ARHGAP21	0.73189	14.0902	99
ARHGAP22	0.671299	5.72649	99
ARHGAP23	1.04833	12.1865	99
ARHGAP24	0.9658	6.16218	99
ARHGAP25	0.98293	12.7157	99
ARHGAP26	1.09616	12.0813	99
ARHGAP27	1.07175	9.56076	99
ARHGAP29	1.06325	11.1235	99
ARHGAP30	1.17659	5.18264	99
ARHGAP31	0.518662	12.4907	99
ARHGAP32	0.67137	14.0824	99
ARHGAP33	0.369903	11.0772	99
ARHGAP35	1.26598	7.77177	99
ARHGAP39	0.758306	14.2047	99
ARHGAP4	1.30109	2.94453	99
ARHGAP42	0.812035	11.444	99
ARHGAP44	1.27418	7.39196	99
ARHGAP45	1.42461	-0.283951	99
ARHGAP5	0.789284	10.1806	99
ARHGAP6	0.780988	14.0971	99
ARHGAP9	1.13801	4.08011	99
ARHGDIA	1.08654	11.2348	99
ARHGDIB	1.48935	1.65534	99
ARHGEF1	1.24012	9.66685	99
ARHGEF10	0.824724	12.9645	99
ARHGEF10L	0.760803	-5.68646	99
ARHGEF11	0.136421	0.119143	99
ARHGEF12	0.647339	14.2258	99
ARHGEF17	0.897466	12.8532	99
ARHGEF18	0.858715	13.8619	99
ARHGEF2	0.903967	2.48532	99
ARHGEF25	0.45915	-6.34518	80
ARHGEF26	0.6534	14.2901	99
ARHGEF3	0.763155	12.3559	99
ARHGEF37	1.10489	10.9236	99
ARHGEF4	0.949545	11.7868	99
ARHGEF40	0.888854	12.0784	99
ARHGEF6	0.503186	12.4517	99
ARHGEF7	1.38123	4.47199	99
ARHGEF9	0.699454	14.5768	99
ARID1A	0.775581	11.9242	99
ARID1B	0.74997	6.3274	99
ARID2	1.34721	0.210479	99
ARID4A	0.818	5.74252	99
ARID4B	1.0614	-4.47709	99
ARID5B	0.60294	12.2777	64
ARIH1	1.10437	0.254517	99
ARIH2	1.21468	6.93375	99
ARL 1.00	0.450984	6.97595	99
ARL 10.00	0.828831	12.2541	99
ARL13B	0.726349	13.0405	90
ARL14EP	0.708417	11.8061	99
ARL 15.00	0.461021	14.3566	99
ARL 2.00	0.743553	14.3812	99
ARL2BP	0.982154	11.7265	99
ARL 3.00	1.01243	3.05404	99
ARL4A	0.669254	10.0058	62
ARL4C	0.455493	12.3573	99
ARL5A	1.16273	9.79904	55
ARL5B	0.640435	11.6693	45
ARL 6.00	0.565052	13.7882	99
ARL6IP1	0.702999	8.58469	99
ARL6IP4	0.763136	13.9202	99
ARL6IP5	0.723276	14.5128	99
ARL6IP6	0.778884	13.9443	99
ARL8A	0.972284	13.2986	99
ARL8B	0.617056	11.7857	99
ARMC1	0.855895	12.8012	99
ARMC10	1.18567	6.94299	99
ARMC5	0.67561	14.1975	99
ARMC6	1.06154	5.33498	99
ARMC7	0.938501	10.5915	53
ARMC8	0.654818	13.911	99
ARMC9	0.638658	14.6655	99
ARMCX1	0.659522	4.56167	99
ARMCX2	0.67812	2.85384	99
ARMCX3	0.902043	-0.166022	99
ARMCX4	0.751642	13.9433	99
ARMCX5	0.635211	13.3912	99
ARMCX6	0.688557	12.232	53
ARMH3	1.34455	0.436135	99
ARMT1	0.719126	13.8994	99
ARNT	0.793663	9.28235	99
ARNT2	1.05212	11.9682	99
ARNTL	0.74335	13.5609	99
ARPC1A	0.749282	0.76942	99
ARPC1B	1.37012	-0.0113609	99
ARPC2	0.837853	6.85431	99
ARPC3	0.920852	11.6541	99
ARPC4	0.609362	7.2775	99
ARPC5	0.578295	14.2038	99
ARPC5L	0.840338	13.873	99
ARPIN	0.817963	13.2527	72
ARPP19	1.07188	-1.28771	99
ARPP21	1.1681	10.5704	99
ARR3	1.00929	11.2275	99
ARRB1	1.25609	9.68371	99
ARRB2	0.526597	7.8016	99
ARRDC1	0.820155	11.9372	99
ARSA	1.01196	11.8833	99
ARSB	0.721446	13.7927	99
ARSD	0.601683	14.4058	99
ARSE	0.874205	8.12584	36
ARSF	1.08758	1.84593	99
ARSK	0.964808	6.57533	81
ART3	0.721626	7.74638	99
ARV1	0.601692	13.3465	81
ARVCF	1.14096	9.7188	99
AS3MT	0.141117	9.18812	99
ASAH1	1.27187	6.69303	99
ASAP1	0.206805	1.89156	99
ASAP2	0.59186	-2.69307	99
ASAP3	1.20659	7.76114	99
ASB1	0.561824	6.7339	99
ASB13	1.19279	3.79469	90
ASB3	0.670508	13.5072	80
ASB6	0.862689	13.6749	99
ASCC1	1.18436	10.2117	99
ASCC2	0.867185	14.5409	99
ASCC3	1.08768	12.0856	99
ASCL1	0.286195	7.7016	46
ASDURF	0.788116	13.0506	99
ASF1A	0.829662	6.63032	99
ASF1B	0.714459	11.3369	72
ASH2L	0.262908	9.41763	99
ASIC1	0.596014	11.896	99
ASIC4	1.39285	5.04456	82
ASL	0.732738	14.2859	99
ASMTL	0.732725	13.2637	99
ASNA1	0.714326	11.6076	99
ASNS	0.888394	1.78291	99
ASNSD1	1.01309	8.92708	81
ASPA	0.700619	5.47005	99
ASPH	1.04728	10.2968	99
ASPHD1	0.747427	14.1801	99
ASPHD2	1.29555	7.75351	89
ASPN	0.828158	-4.51253	99
ASPRV1	0.785654	7.12555	36
ASPSCR1	0.896434	12.4019	99
ASRGL1	1.65547	-4.50593	99
ASS1	0.685447	14.4483	99
ASTN1	1.04131	11.9418	99
ASTN2	0.882769	13.1296	99
ASXL2	0.552503	12.6666	73
ATAD1	0.346963	8.76767	99
ATAD2	1.03417	9.05433	99
ATAD2B	0.76141	9.18511	90
ATAD3A	0.989593	12.9635	99
ATAD3B	0.751363	5.85061	54
ATAT1	0.657326	14.0277	99
ATCAY	1.31148	6.67951	99
ATE1	1.08004	-2.4979	99
ATF1	0.594921	13.6416	99
ATF2	0.224873	6.84575	99
ATF3	1.33682	5.35563	35
ATF6	0.94238	12.2101	99
ATF6B	3.2886	-0.172374	37
ATF7	0.498712	11.2445	99
ATF7IP	0.894276	12.3746	99
ATG10	0.61641	10.8963	36
ATG101	1.28243	3.39847	99
ATG12	0.783122	13.9364	99
ATG13	0.0445545	6.83842	99
ATG14	0.37362	-0.435095	99
ATG16L1	0.8294	11.1278	99
ATG2A	0.795857	10.9554	99
ATG2B	0.606122	11.1903	99
ATG3	1.10726	11.7822	99
ATG4A	0.916861	13.0552	99
ATG4B	0.773249	13.9183	99
ATG4C	0.624233	5.37999	99
ATG5	0.66063	14.3017	99
ATG7	0.748152	14.0994	99
ATG9A	0.749488	11.3774	99
ATIC	0.987859	12.7224	99
ATL1	1.27254	5.01656	99
ATL2	0.548368	7.57594	99
ATL3	0.911469	13.5801	99
ATM	0.562369	14.0028	99
ATN1	1.02498	12.579	99
ATOX1	1.29493	9.01231	99
ATP11A	0.85287	12.4204	99
ATP11B	0.734152	9.04656	99
ATP11C	0.787562	12.7511	99
ATP12A	1.17827	7.77473	99
ATP13A1	1.0643	9.88172	99
ATP13A2	0.268586	8.41887	99
ATP13A3	1.03824	11.7413	99
ATP13A4	0.70117	12.052	90
ATP1A1	0.795412	14.1223	99
ATP1A2	1.06226	10.546	99
ATP1A3	1.60058	-2.99825	99
ATP1B1	1.59231	-1.59158	99
ATP1B2	0.883496	13.8113	99
ATP1B3	0.985885	9.93112	99
ATP23	0.822437	-1.97156	58
ATP2A2	1.02243	10.5585	99
ATP2A3	0.659216	6.93209	99
ATP2B1	0.69882	14.253	99
ATP2B2	1.53374	0.319837	99
ATP2B3	1.15587	7.12674	99
ATP2B4	0.600953	12.098	99
ATP2C1	0.197804	9.95271	99
ATP4A	1.39915	7.98459	77
ATP5F1A	0.809866	12.4116	99
ATP5F1B	1.29924	8.12621	99
ATP5F1C	1.02744	12.2428	99
ATP5F1D	0.950127	12.8353	99
ATP5F1E	0.520347	8.23445	99
ATP5IF1	0.914762	13.1041	99
ATP5MC1	0.0952593	2.90747	70
ATP5MD	0.686868	11.4346	99
ATP5ME	0.979743	10.5862	99
ATP5MF	1.48113	5.21186	44
ATP5MF-PTCD1	0.150926	8.20758	99
ATP5MG	0.663207	6.07818	99
ATP5MPL	0.846007	13.6198	99
ATP5PB	0.861044	13.2851	99
ATP5PD	0.880302	13.5115	99
ATP5PF	0.978367	11.9607	99
ATP5PO	0.882868	11.1118	99
ATP5S	0.381283	9.59335	99
ATP6AP1	0.660234	1.68965	99
ATP6AP2	0.61201	12.3021	99
ATP6V0A1	1.14799	-1.92768	99
ATP6V0A2	0.845285	10.977	99
ATP6V0C	0.73633	7.0371	99
ATP6V0D1	0.88556	12.0899	99
ATP6V0D2	0.781216	13.7922	99
ATP6V1A	1.04372	10.0024	99
ATP6V1B2	0.963274	9.06982	99
ATP6V1C1	0.944803	11.4997	99
ATP6V1D	1.0109	9.64404	99
ATP6V1E1	1.64018	-1.7622	99
ATP6V1F	1.21184	5.70079	99
ATP6V1G1	0.77189	14.1893	99
ATP6V1G2	1.37245	4.05292	99
ATP6V1H	1.26186	-4.28097	99
ATP7A	0.511207	8.88216	99
ATP8A1	1.30645	-0.491118	99
ATP8A2	1.21249	2.08893	99
ATP9A	1.26806	8.76801	99
ATP9B	1.04248	12.9286	99
ATPAF1	0.547721	12.5671	99
ATPAF2	0.72891	-5.15625	99
ATR	0.859073	13.6518	99
ATRAID	0.916682	13.6338	99
ATRIP	0.662335	13.5339	99
ATRN	1.20797	1.67447	99
ATRNL1	0.606621	13.4301	99
ATRX	0.489182	9.06327	99
ATXN1	1.1016	9.29668	99
ATXN10	1.37046	5.54033	99
ATXN1L	1.50059	2.67891	99
ATXN2	0.672194	13.1255	99
ATXN2L	0.857565	12.9206	99
ATXN3	0.576585	14.1262	99
ATXN7	0.638283	14.3707	99
ATXN7L3	0.899997	12.9898	71
ATXN7L3B	0.802799	5.47945	99
AUH	1.25788	7.17901	99
AUP1	1.04691	12.2955	99
AURKA	0.46962	11.2533	64
AURKAIP1	0.970779	10.0781	90
AURKB	0.663974	3.90479	46
AUTS2	0.534951	11.5848	99
AVEN	0.883898	10.7481	99
AVL9	1.03406	4.8606	99
AXIN1	0.637227	13.0126	71
AXL	0.578166	8.92643	99
AZGP1	0.964682	12.4748	99
AZI2	0.975243	12.7066	99
AZU1	0.923502	0.570121	99
B2M	0.55832	14.368	99
B3GALNT1	0.5765	9.56835	36
B3GALT6	0.0599487	7.05905	99
B3GAT1	1.35066	8.63909	35
B3GAT3	0.622115	14.3534	99
B3GLCT	0.91332	9.55742	99
B3GNT2	1.03759	5.37026	46
B3GNT9	0.790895	13.4991	82
B3GNTL1	0.592345	13.6634	99
B4GALNT1	0.831479	5.95737	91
B4GALT1	1.26069	-9.06334	99
B4GALT3	0.647504	10.9067	64
B4GALT4	1.43093	3.64427	99
B4GALT5	0.95159	6.9838	91
B4GALT7	0.96916	11.757	99
B4GAT1	0.563346	13.6748	99
B9D1	0.520252	13.5788	81
B9D2	0.886267	-2.94084	99
BAALC	1.07417	10.3621	99
BABAM1	0.606804	14.4942	99
BABAM2	0.577895	14.2779	99
BACE1	0.885244	12.0187	99
BACH1	1.06279	5.75087	99
BAD	0.798711	13.5197	99
BAG1	0.813907	9.52264	99
BAG2	0.870436	13.8786	99
BAG3	0.956339	13.1851	99
BAG4	0.770895	14.0217	99
BAG5	0.929882	13.1326	99
BAG6	1.05896	11.8973	99
BAHD1	0.618403	12.728	71
BAIAP2	1.05293	4.7108	99
BAIAP2L1	0.74969	6.87379	36
BAIAP3	0.92102	9.84624	99
BAK1	1.6687	-1.74054	81
BANF1	0.83345	13.642	99
BANP	1.03866	6.38118	99
BAP1	1.02295	10.0388	90
BARD1	0.0890396	6.09954	82
BASP1	1.30908	7.48247	99
BAX	0.687359	13.9118	99
BAZ1A	0.791092	5.44825	99
BAZ1B	0.510327	5.18515	99
BAZ2A	0.655004	14.4089	99
BAZ2B	0.671441	7.6688	99
BBIP1	0.581863	9.78502	99
BBOX1	0.635355	12.1714	99
BBS1	0.628532	14.1573	99
BBS2	0.588349	14.5024	99
BBS4	0.809863	14.3518	99
BBS5	0.857011	14.1766	99
BBS7	0.77476	14.4673	99
BBS9	0.415245	14.0522	99
BBX	0.483427	14.3934	99
BCAM	0.552706	9.22471	99
BCAN	0.727229	9.92951	99
BCAP29	0.301291	10.5715	99
BCAP31	0.110291	4.56364	99
BCAR1	0.191529	4.41302	99
BCAR3	0.611104	12.8131	99
BCAS1	1.1138	8.63079	99
BCAS2	0.529638	14.3291	99
BCAS3	0.726463	12.6219	99
BCAT1	1.4245	3.80866	99
BCAT2	1.09655	0.344094	99
BCCIP	0.578167	12.6209	99
BCDIN3D	1.27619	8.84306	72
BCHE	0.605622	13.1804	99
BCKDHA	0.881598	1.18204	99
BCKDHB	0.716677	12.3198	99
BCKDK	1.045	11.0644	99
BCL10	0.887657	12.7693	99
BCL11A	0.510238	12.4389	90
BCL11B	0.775149	5.78988	37
BCL2	0.711709	11.7926	99
BCL2L1	0.595644	8.84122	99
BCL2L13	1.11528	9.07284	99
BCL3	0.878924	7.72573	89
BCL6	1.18511	9.91552	81
BCL7A	1.03672	3.94503	99
BCL7B	0.458373	10.1655	99
BCL7C	0.80253	14.6189	99
BCL9	1.09185	11.0565	99
BCL9L	0.625538	14.2104	99
BCLAF1	0.58145	14.117	99
BCLAF3	0.992646	10.4912	99
BCO1	1.06671	11.5266	71
BCR	0.765437	13.2154	99
BCS1L	0.533761	5.25302	99
BDH1	1.058	11.8776	99
BDH2	0.706836	14.4662	99
BDNF	1.14421	-1.68673	99
BECN1	0.796827	14.124	99
BEGAIN	0.74892	13.1456	90
BEND3	0.945671	11.79	81
BEND5	0.807217	10.2744	81
BET1	1.05712	10.7457	99
BET1L	0.624959	13.4852	81
BEX4	1.09457	11.3193	90
BGN	0.972009	11.1492	99
BHLHB9	1.04031	1.67401	45
BHLHE41	1.25787	7.2081	72
BHMT	0.626879	6.1502	45
BICC1	0.756979	13.9303	99
BICD1	0.715881	8.52206	99
BICD2	1.06231	11.905	99
BICRA	0.8498	6.4293	90
BICRAL	0.472308	13.8357	90
BID	0.918935	13.4989	99
BIN1	0.666003	7.75137	99
BIN2	1.3376	4.19758	99
BIN3	1.11544	8.13044	99
BIRC2	1.21054	8.77288	99
BIRC6	1.1368	9.41986	99
BLM	0.641857	11.618	99
BLMH	0.0105125	8.25116	99
BLNK	0.734854	10.6353	99
BLOC1S1	0.99079	11.9403	99
BLOC1S2	1.29643	6.50071	99
BLOC1S3	0.902346	13.4607	99
BLOC1S4	1.13808	0.76942	99
BLOC1S5	1.08996	11.7469	99
BLOC1S6	0.95274	14.1048	99
BLVRA	0.349125	2.74316	99
BLVRB	0.857767	-0.738489	99
BLZF1	0.945121	12.6858	72
BMP1	1.44734	-1.32873	99
BMP2K	1.00388	12.8111	99
BMP7	0.700694	10.7133	99
BMPER	0.176534	2.52844	71
BMPR1A	1.11422	9.16152	81
BMPR1B	0.707097	12.3041	54
BMPR2	0.8426	13.0388	99
BMS1	1.01133	12.3899	99
BMT2	0.348437	10.883	37
BNIP1	0.999036	12.8352	99
BNIP2	1.07171	13.1325	99
BNIP3	1.00833	12.4856	99
BNIP3L	0.881397	10.7189	91
BOD1	0.827567	13.808	99
BOD1L1	0.60205	11.5391	99
BOLA1	0.883597	12.7468	99
BOLA2	0.951812	11.1606	99
BOLA3	0.739973	13.0675	99
BOP 1.00	0.904747	6.46094	99
BORCS5	0.985866	13.1057	99
BORCS6	1.02836	8.33379	99
BORCS7	1.02987	11.0695	99
BORCS8	0.371636	3.89789	99
BPGM	0.897906	3.24009	99
BPHL	0.634439	12.5836	99
BPI	1.18362	-14.2989	99
BPNT1	1.0558	12.3149	99
BPTF	0.840274	12.2356	99
BRAF	1.63619	0.741477	99
BRAP	0.907203	13.2291	99
BRAT1	0.985757	12.8079	99
BRCC3	0.624056	13.9192	99
BRD1	0.857937	13.8987	99
BRD2	0.727641	12.7681	99
BRD3	0.669381	9.87875	99
BRD4	0.987253	6.27161	99
BRD7	1.11504	9.24115	99
BRD8	1.21952	-4.6579	99
BRD9	0.559031	-0.01477	99
BRF1	0.824135	2.09886	99
BRI3	0.784216	14.4964	99
BRI3BP	0.702552	13.218	99
BRINP1	1.12942	10.2481	99
BRINP2	0.682451	0.0367065	99
BRINP3	1.13918	11.2831	90
BRIX1	1.00699	10.7715	99
BRK1	0.798198	10.3492	99
BRMS1L	0.558431	14.5308	99
BROX	1.19746	9.31765	99
BRPF1	0.841263	12.0425	99
BRPF3	1.38455	3.72842	62
BRSK1	1.22853	3.70205	99
BRSK2	1.18929	10.0222	99
BRWD1	0.734077	14.3719	99
BSCL2	1.28305	6.14236	99
BSDC1	1.0165	11.1735	99
BSG	0.932532	13.314	99
BSN	1.24577	-1.13993	99
BST1	0.651498	7.18627	99
BST2	1.32035	7.58041	99
BTAF1	0.730021	6.18499	99
BTBD1	0.114627	-4.05197	99
BTBD10	0.626691	14.0844	99
BTBD11	0.811665	10.0323	99
BTBD17	1.1655	-6.81106	99
BTBD2	0.6778	1.74072	99
BTBD8	0.766274	13.6961	99
BTBD9	0.93207	-4.30588	99
BTD	1.08488	7.62395	99
BTF3	0.514224	14.239	99
BTF3L4	0.557617	14.4397	99
BTK	1.18202	3.91687	99
BTN2A1	0.878686	9.98596	99
BTN3A1	0.667141	10.2389	99
BTN3A2	0.631951	14.0953	99
BTN3A3	0.562308	11.6831	99
BTRC	0.0418297	6.04431	35
BUB1B	0.192911	6.90283	99
BUB1B-PAK6	0.851829	12.8954	81
BUB3	0.679054	13.9274	99
BUD13	0.810508	7.27769	99
BUD23	1.06488	11.7532	99
BUD31	0.295661	8.91109	99
BYSL	0.846049	12.0471	99
BZW1	1.15171	10.4617	99
BZW2	1.08	9.09273	99
C10orf88	1.53278	5.94101	35
C11orf54	0.857152	14.1832	99
C11orf58	0.760761	8.03778	99
C11orf68	1.02042	7.94378	99
C11orf95	0.985919	6.59512	46
C11orf96	0.894025	13.5338	99
C11orf98	0.951831	11.0029	99
C12orf10	0.462349	10.2236	99
C12orf29	1.07791	11.1855	99
C12orf4	0.769953	13.3953	99
C12orf43	0.884043	8.89019	99
C12orf45	0.686885	12.1744	99
C12orf57	0.870684	13.5823	99
C12orf65	1.00309	8.44879	44
C12orf66	0.175843	7.25149	99
C12orf73	0.722659	9.18637	64
C12orf75	0.507711	12.7402	99
C14orf119	1.36405	6.35868	99
C15orf40	1.17522	10.6263	99
C15orf41	0.261204	6.39935	73
C16orf45	1.13493	9.59406	99
C16orf58	0.85511	14.0728	99
C16orf70	0.77791	7.36116	99
C16orf72	0.818194	9.10982	45
C16orf86	1.21421	7.57781	62
C16orf91	0.482117	13.266	81
C17orf100	0.57911	2.70639	99
C17orf49	0.89147	8.02388	99
C17orf75	0.387856	10.5413	99
C17orf80	0.997434	12.0269	99
C17orf97	1.07037	8.94652	99
C18orf21	1.57499	-1.40426	99
C18orf25	0.638805	14.3217	99
C18orf32	1.08682	8.57703	99
C19orf12	0.642391	14.0455	99
C19orf25	0.697237	8.05427	99
C19orf33	1.06315	3.13378	99
C19orf47	1.08669	11.3541	99
C19orf53	0.525793	8.86256	81
C19orf54	0.154645	11.1259	99
C19orf66	0.807492	13.5721	99
C19orf70	0.885659	4.32956	99
C1D	0.736417	12.8801	81
C1GALT1	0.888055	12.4283	81
C1GALT1C1	0.557725	12.16	81
C1QA	1.18958	6.46374	99
C1QB	1.3334	0.63997	99
C1QBP	0.4593	14.3927	99
C1QC	1.22847	7.77996	99
C1QL1	1.23808	-6.18525	99
C1QL3	1.2429	8.76634	99
C1QTNF1	0.997227	11.152	54
C1QTNF3	0.690888	-0.0346759	99
C1QTNF4	0.751629	12.7619	89
C1QTNF5	1.03185	7.89081	99
C1R	0.903234	13.4274	99
C1RL	0.814865	13.8894	99
C1S	0.689361	13.7252	99
C1orf109	0.821906	13.7967	81
C1orf122	0.757233	4.90118	99
C1orf123	0.821691	13.5677	99
C1orf131	1.74754	5.01079	55
C1orf159	0.779502	10.2813	53
C1orf174	0.644645	14.4985	99
C1orf198	1.16247	9.35891	99
C1orf21	1.03563	8.98406	99
C1orf226	1.02266	11.1791	99
C1orf35	0.908114	9.91195	99
C1orf43	1.08033	10.9689	99
C1orf50	0.478468	11.9896	99
C1orf52	0.781213	14.5493	99
C1orf53	0.543267	5.717	54
C2	1.27831	7.61038	99
C20orf194	0.613537	14.2327	99
C20orf27	0.815295	10.187	99
C21orf2	0.962572	13.0694	99
C21orf91	1.16178	4.89176	35
C2CD2	0.438349	12.7876	99
C2CD2L	1.01528	9.0314	99
C2CD4C	1.23991	8.16056	99
C2CD5	0.819514	10.9551	99
C2orf49	1.05057	10.7375	99
C2orf68	0.969376	8.42601	45
C2orf69	0.822301	13.5613	99
C2orf72	0.687164	14.3682	99
C2orf76	0.753016	13.9385	99
C2orf88	0.743165	12.494	99
C3	0.939792	10.9884	99
C3AR1	1.1692	7.22814	99
C3orf14	0.455204	2.06794	72
C3orf33	0.393483	10.6605	81
C3orf38	0.890473	14.0277	99
C3orf58	0.81678	14.0122	99
C3orf70	1.19412	7.57132	36
C4A	1.0382	11.1595	99
C4B	1.5808	-11.3465	85
C4BPA	0.869886	10.8441	99
C4BPB	0.916727	9.20524	99
C4orf19	0.663843	11.4632	44
C4orf3	0.903599	12.1578	99
C4orf33	1.09242	9.33635	99
C4orf48	1.07059	10.8518	62
C5	1.03647	11.9212	99
C5AR1	1.09124	9.98285	99
C5orf15	0.483361	13.2343	81
C5orf22	0.806467	13.5885	99
C5orf24	1.12472	7.25492	99
C5orf30	0.248032	4.89435	72
C5orf51	1.0574	10.399	99
C6	0.899693	12.1845	99
C6orf106	1.15318	7.72329	99
C6orf120	0.397414	11.8038	61
C6orf136	1.36823	3.34007	99
C6orf203	0.00330331	9.45801	99
C6orf47	0.852369	11.6884	99
C6orf89	0.180814	9.48612	91
C7	1.25219	1.01496	99
C7orf25	0.973804	2.32739	99
C7orf26	1.21992	9.84867	81
C7orf43	1.04552	9.99161	99
C7orf50	0.824553	13.3147	99
C7orf57	0.960261	1.45863	72
C8A	1.04152	8.53695	99
C8B	0.896519	11.2454	99
C8G	0.820957	9.82456	99
C8orf33	1.21397	3.1227	99
C8orf37	1.06537	11.6983	99
C8orf59	0.0583971	5.41756	82
C8orf76	1.33643	7.56128	73
C8orf82	1.02061	11.4551	99
C8orf88	1.32531	9.37678	63
C9	1.12328	12.209	99
C9orf16	1.21552	7.18491	99
C9orf40	0.70343	11.6034	99
C9orf64	0.277819	9.27372	99
C9orf72	0.513734	12.0423	99
C9orf78	0.835267	9.65766	99
C9orf85	0.236157	9.92725	55
CA1	0.996935	10.1413	99
CA10	0.916565	11.395	70
CA11	0.820754	13.48	90
CA12	1.09237	6.93905	99
CA13	1.00626	13.0795	99
CA14	1.0138	9.34395	99
CA2	1.06374	7.50205	99
CA3	1.3858	-5.91335	99
CA4	1.33836	6.13317	99
CA5B	0.902964	5.48928	99
CA8	0.809554	8.54635	99
CA9	0.771279	13.4634	99
CAAP1	1.06021	-0.234579	99
CAB39	0.541757	12.5026	99
CAB39L	0.439102	10.5512	99
CABIN1	1.25819	1.39536	99
CABLES1	0.940311	13.6887	99
CABLES2	0.162787	-1.16537	90
CABP1	0.579574	11.4037	99
CACFD1	0.61339	9.58371	99
CACHD1	0.665936	14.4251	99
CACNA1A	0.915894	8.08068	99
CACNA1B	1.11416	-1.84729	99
CACNA1E	0.753947	10.3248	99
CACNA2D1	1.08982	11.2129	99
CACNA2D2	1.38341	2.49239	99
CACNA2D3	1.33073	2.96761	99
CACNB1	0.865752	11.4584	99
CACNB2	0.422025	8.15499	99
CACNB3	0.652954	13.4087	99
CACNB4	0.841745	12.7243	99
CACNG2	0.877603	12.805	99
CACNG3	1.08742	2.77954	99
CACNG4	0.873648	12.5009	71
CACNG7	0.981687	11.0445	91
CACNG8	0.972627	7.98799	99
CACTIN	0.858872	10.6601	99
CACUL1	1.21471	9.21182	99
CACYBP	0.505401	10.7571	99
CAD	0.999419	8.89012	99
CADM1	0.701099	14.04	99
CADM2	1.21941	8.49992	99
CADM3	1.48392	1.52873	99
CADM4	1.12284	10.8755	99
CADPS	1.14551	10.6	99
CADPS2	0.674469	9.87862	99
CALB1	0.816437	12.2621	99
CALB2	0.537262	12.923	99
CALCOCO1	1.04614	10.4723	99
CALCOCO2	0.49319	8.40224	99
CALCRL	0.98131	12.0704	99
CALD1	0.549451	14.417	99
CALHM2	0.936355	12.123	99
CALHM5	0.714106	12.4224	81
CALM2	1.0308	8.9084	99
CALML3	1.08804	11.4	90
CALML5	1.19012	-16.3786	81
CALR	1.68974	-4.92424	99
CALU	0.664944	13.0507	99
CAMK1	0.931958	13.5589	99
CAMK1D	1.39161	0.842822	99
CAMK1G	1.0461	11.8302	99
CAMK2A	1.63905	-7.80223	99
CAMK2B	1.24111	6.74904	99
CAMK2D	0.982591	13.001	99
CAMK2G	1.06165	8.53446	99
CAMK2N1	0.831814	13.0287	81
CAMK2N2	1.02145	9.28464	37
CAMK4	1.36141	3.36091	99
CAMKK1	1.36771	-2.93329	99
CAMKK2	0.450997	2.21585	99
CAMKMT	0.401517	10.1263	99
CAMKV	1.20249	7.16486	99
CAMLG	0.337266	12.3479	99
CAMP	1.25903	-4.25215	99
CAMSAP1	0.8507	3.98797	99
CAMSAP2	0.970716	12.708	99
CAMSAP3	1.26119	5.06758	99
CAND1	0.274917	-31.803	99
CAND2	0.931183	13.4339	99
CANT1	0.887507	12.2638	99
CANX	0.742176	13.9003	99
CAP1	1.11756	10.0413	99
CAP2	0.507238	4.64223	99
CAPG	0.593733	10.0064	99
CAPN1	0.91246	11.8651	99
CAPN15	0.56281	12.1488	99
CAPN2	0.922222	12.5458	99
CAPN5	0.987874	5.51096	99
CAPN7	1.04473	12.6743	99
CAPNS1	1.00874	12.3432	99
CAPRIN1	0.734053	13.841	99
CAPRIN2	0.898092	2.73761	99
CAPS	1.02458	7.19227	99
CAPZA1	1.11186	10.0038	99
CAPZA2	1.04748	12.0962	99
CAPZB	0.902613	12.2763	99
CARD11	0.719881	12.8468	99
CARD16	0.744442	13.1404	99
CARD19	0.884273	13.4772	99
CARD6	1.01518	10.8341	99
CARD8	1.21945	8.288	99
CARD9	0.864438	11.1009	99
CARHSP1	0.248487	9.87789	99
CARM1	1.216	8.08132	99
CARMIL1	1.37302	4.02655	99
CARMIL2	1.13901	10.5716	99
CARNMT1	0.947043	13.3632	99
CARNS1	0.880762	-7.35709	99
CARS	0.843334	12.3837	99
CARS2	0.132867	8.99707	99
CARTPT	0.926423	1.62297	91
CASC3	0.414563	10.4831	99
CASC4	0.812118	11.574	99
CASK	0.781153	14.1622	99
CASKIN1	1.36057	-4.05889	99
CASKIN2	1.33949	9.99459	99
CASP1	0.804138	14.1099	99
CASP10	1.02438	9.36543	99
CASP2	0.800175	13.7245	99
CASP3	0.963115	12.8903	99
CASP4	0.969231	13.3555	99
CASP6	1.10636	9.97676	99
CASP7	0.764353	13.7786	99
CASP8	0.755707	14.1573	99
CASP9	0.976163	12.2667	99
CAST	1.6117	-1.72885	99
CASTOR1	0.817808	12.5407	99
CASTOR2	0.57706	13.7469	99
CAT	0.964432	3.42558	99
CAV1	1.02457	12.5271	99
CAV2	1.26177	7.35467	99
CAVIN1	1.11496	11.0524	99
CAVIN2	1.12762	4.08938	99
CAVIN3	0.885369	10.7195	99
CBARP	0.804974	14.5793	99
CBFA2T2	0.407668	12.8373	64
CBFB	0.539166	14.3299	99
CBL	0.949936	7.19421	99
CBLB	0.887066	13.0232	99
CBLL1	0.676971	6.3989	99
CBLN2	0.485415	13.1605	70
CBLN4	0.438517	-0.984119	98
CBR1	0.0545803	-0.630408	99
CBR3	0.891485	11.1966	99
CBR4	0.419043	7.89869	99
CBS	0.973679	13.1639	99
CBWD2	0.254469	7.83317	99
CBWD3	1.8086	5.74537	37
CBX1	0.461033	13.4854	99
CBX2	0.735446	8.22253	99
CBX3	0.899547	12.0257	99
CBX4	1.01294	11.3603	99
CBX5	0.969804	5.32113	99
CBX6	0.789419	10.424	90
CBX7	0.276545	9.13178	36
CBX8	0.925273	11.2974	99
CC2D1A	1.0981	6.86703	99
CC2D1B	0.58383	14.333	99
CC2D2A	0.427789	13.9475	99
CCAR1	0.730998	11.7156	99
CCAR2	1.00338	11.377	99
CCDC102A	0.977852	11.1774	99
CCDC102B	1.9394	-5.51315	36
CCDC106	0.070262	2.2927	64
CCDC115	0.855895	7.46701	99
CCDC117	0.537514	11.9995	90
CCDC12	0.817388	12.5378	99
CCDC120	1.22543	9.71144	99
CCDC124	0.466147	12.4141	99
CCDC127	0.346692	9.78847	99
CCDC130	1.1459	8.46572	90
CCDC134	0.943002	12.7471	99
CCDC136	0.967816	12.5456	99
CCDC137	0.685717	8.13743	44
CCDC149	0.621095	13.9033	81
CCDC167	0.987334	9.31567	72
CCDC174	1.11952	11.8289	99
CCDC177	1.34584	-0.153427	99
CCDC186	0.932846	11.8886	89
CCDC22	0.415333	12.6445	99
CCDC25	0.667192	12.7319	99
CCDC28A	1.21267	1.87929	99
CCDC28B	0.703542	12.3943	62
CCDC32	0.471782	12.6789	81
CCDC43	0.860949	11.1574	99
CCDC47	0.938414	8.45389	99
CCDC50	0.61129	14.4048	99
CCDC51	0.376635	5.29046	99
CCDC58	0.223128	4.49404	99
CCDC59	1.02854	10.7226	55
CCDC6	0.800969	12.587	99
CCDC61	0.709313	13.9944	99
CCDC71L	0.835431	11.0298	54
CCDC8	1.36497	4.89844	99
CCDC80	0.982912	12.622	99
CCDC82	0.682708	3.00887	99
CCDC84	0.335505	7.78147	70
CCDC85A	0.656748	13.6529	99
CCDC85B	0.669508	13.4267	81
CCDC85C	0.544151	12.2835	91
CCDC86	0.985971	11.7806	99
CCDC88A	1.0298	10.796	99
CCDC88B	0.884675	11.1161	99
CCDC88C	0.734537	13.6079	99
CCDC9	0.836862	13.4673	99
CCDC90B	0.727454	13.6574	99
CCDC91	0.641527	14.3808	99
CCDC92	1.07343	6.86088	99
CCDC92B	0.651367	11.6128	58
CCDC93	0.32554	9.92831	99
CCDC97	0.804293	13.8707	99
CCDC9B	0.931877	13.0671	99
CCK	0.959435	10.7966	99
CCL14	0.539477	12.1992	89
CCL18	0.811317	-2.64664	80
CCL2	1.03965	10.937	62
CCL20	1.11751	-5.27924	63
CCL5	1.30711	6.09119	99
CCM2	0.532633	8.2293	99
CCNA2	0.696139	12.0864	99
CCNB1	0.598653	7.76766	90
CCNB2	0.519665	5.9188	46
CCND1	0.589203	3.13986	45
CCND2	1.18436	10.0973	82
CCNDBP1	1.22117	8.8067	99
CCNH	1.11505	8.95421	99
CCNK	0.538013	13.0698	99
CCNL1	0.909935	3.13866	99
CCNL2	0.533081	13.7977	82
CCNT1	0.674862	6.93372	99
CCNT2	0.532318	13.528	99
CCNY	0.727433	11.5413	99
CCNYL1	5.95254	-17.7368	81
CCP110	0.754997	6.38671	99
CCPG1	0.93848	13.9357	99
CCR1	1.02318	11.4743	90
CCRL2	1.14947	5.09409	45
CCS	1.08102	11.1245	99
CCSAP	1.0057	1.55816	99
CCSER2	0.710955	3.29568	81
CCT2	0.0262115	2.41947	99
CCT3	0.705772	13.7287	99
CCT4	1.00006	3.43411	99
CCT5	0.85047	13.841	99
CCT6A	0.85967	-56.0194	99
CCT6B	0.743582	11.3445	64
CCT7	0.673441	13.5765	99
CCT8	0.596182	14.4596	99
CCZ1	0.880431	14.1377	99
CD109	1.07026	9.44297	99
CD14	1.00203	12.6262	99
CD151	0.875123	13.9201	99
CD163	0.991176	11.5477	99
CD164	1.28652	1.63696	63
CD177	0.925927	-4.67298	90
CD180	1.09906	4.44876	99
CD2	0.157742	7.8365	45
CD200	0.937939	12.7937	99
CD248	0.814778	13.0842	99
CD274	1.13729	8.60494	99
CD276	0.912681	12.3725	99
CD2AP	1.24328	5.79992	99
CD2BP2	1.06667	11.0035	99
CD300A	1.09796	6.82421	99
CD300LF	1.27789	4.46303	53
CD320	0.726523	13.5171	99
CD33	1.28298	1.33736	99
CD34	0.993156	0.969223	99
CD36	1.06985	-3.21361	99
CD37	1.0032	3.13899	36
CD38	0.893612	11.7153	99
CD3EAP	1.16757	8.36235	99
CD4	1.07776	4.55	99
CD40	0.833545	6.42538	99
CD44	0.923915	12.1319	99
CD46	0.96603	12.9209	99
CD47	0.593987	12.9906	99
CD48	1.09195	9.82839	90
CD53	1.12351	12.0761	99
CD55	0.881328	13.3256	99
CD58	1.14765	5.95178	99
CD59	1.12571	11.1705	99
CD5L	0.819799	5.97905	99
CD63	0.723916	14.3063	99
CD68	1.11812	4.75504	91
CD74	0.923757	13.5417	99
CD81	0.800352	12.2686	99
CD82	0.744419	10.5032	99
CD84	1.06539	10.5385	99
CD8A	0.708308	1.59161	46
CD9	0.544503	13.3846	99
CD93	0.887264	13.5546	99
CD99	0.56487	13.5668	99
CD99L2	0.904476	10.3484	99
CDA	1.20554	-6.56994	99
CDADC1	0.470245	12.1438	82
CDAN1	0.638448	14.1989	99
CDC123	0.962303	12.0464	99
CDC16	0.972599	12.6392	99
CDC20	0.62301	12.8449	69
CDC23	1.03787	12.3639	99
CDC26	0.912307	11.148	99
CDC27	1.00307	12.41	99
CDC34	1.05866	12.3482	99
CDC37	0.645279	14.3289	99
CDC37L1	0.743816	15.0621	99
CDC40	0.846814	10.3287	99
CDC42	0.983408	13.2693	99
CDC42BPA	0.797923	9.77253	99
CDC42BPB	0.941934	3.66239	99
CDC42EP1	0.772299	13.9088	99
CDC42EP2	1.02742	2.09188	99
CDC42EP3	0.907298	10.9595	44
CDC42EP4	0.763089	12.6222	99
CDC42EP5	1.3089	-5.93469	81
CDC42SE1	0.857712	12.0085	90
CDC42SE2	0.810051	13.7965	99
CDC5L	0.819414	13.4555	99
CDC73	0.839096	13.465	99
CDCA3	0.0207296	5.76217	36
CDCA5	1.52164	4.29642	37
CDCA7	1.19073	11.1353	62
CDCA7L	1.35847	3.89585	99
CDCA8	0.686451	3.24156	46
CDCP1	0.657304	7.18049	81
CDH1	0.907532	5.54958	99
CDH10	0.856886	10.5479	99
CDH11	0.635101	13.887	99
CDH13	1.37013	4.95185	99
CDH18	0.00549226	6.14845	99
CDH2	0.742076	12.8624	99
CDH20	0.848608	11.2646	99
CDH4	1.03537	11.7174	99
CDH5	1.00793	12.1103	99
CDH6	0.81112	13.561	99
CDH8	0.472591	13.04	80
CDH9	1.498	4.65109	81
CDIP1	0.885076	13.7851	99
CDIPT	0.0433067	6.80758	99
CDK1	0.499856	12.1979	99
CDK11A	1.15787	3.01802	90
CDK11B	0.688361	14.4293	99
CDK12	0.994644	12.3497	99
CDK13	1.1526	7.40614	99
CDK14	1.12921	11.0417	99
CDK16	1.14588	12.6266	99
CDK17	0.758372	10.2079	99
CDK18	0.639068	6.38575	99
CDK19	0.330699	8.64148	81
CDK2	0.998455	11.5464	99
CDK20	0.55726	9.14568	63
CDK2AP1	0.622926	13.5044	99
CDK3	0.72747	11.8942	99
CDK4	2.83867	-78.3304	99
CDK5	0.690091	9.52389	99
CDK5R2	0.322994	13.0144	72
CDK5RAP1	1.03435	11.3209	54
CDK5RAP2	0.840532	14.0008	99
CDK5RAP3	0.844121	13.8584	99
CDK6	1.50908	1.6993	99
CDK7	0.848681	11.1436	99
CDK8	1.11538	11.2225	64
CDK9	1.0792	1.98252	99
CDKAL1	0.935733	11.226	99
CDKL5	1.07274	10.6636	99
CDKN1A	1.10363	11.3728	90
CDKN1B	0.914449	13.3532	99
CDKN1C	0.861968	8.9392	63
CDKN2A	1.75338	-27.1212	99
CDKN2AIP	0.507862	9.12657	99
CDKN2AIPNL	0.758948	14.1428	99
CDKN2C	1.34547	0.408258	99
CDKN2D	0.690413	6.07987	81
CDO1	0.701472	14.2976	99
CDPF1	0.53355	13.8059	90
CDR2	0.0294618	-2.08192	90
CDR2L	0.482765	1.45578	99
CDS1	0.400225	-1.122	99
CDS2	0.81772	12.5635	99
CDV3	0.541158	11.2905	99
CDYL	0.984873	9.3775	99
CDYL2	0.431552	11.3734	71
CEACAM8	1.31717	-5.73888	90
CEBPA	0.696873	9.2138	62
CEBPB	0.606801	9.79077	90
CEBPD	0.829191	13.4838	81
CEBPG	0.787548	13.5789	90
CEBPZ	0.972243	12.7517	99
CEBPZOS	0.678614	12.5718	99
CELF1	0.922205	10.0176	99
CELF2	0.848316	13.8171	99
CELF3	0.568161	9.05115	72
CELF4	1.18906	5.43241	99
CELF5	1.45347	4.56612	71
CELF6	1.02502	9.75678	36
CELSR2	0.618844	14.3918	99
CEMIP2	0.930562	9.33282	99
CEND1	1.30428	8.30771	99
CENPB	0.600164	11.4149	99
CENPC	0.26055	7.7937	99
CENPF	0.588998	11.3881	99
CENPH	0.488153	12.674	99
CENPK	0.415613	6.48592	55
CENPL	0.0563789	3.71518	46
CENPM	0.428456	12.2748	55
CENPN	0.37845	12.147	54
CENPU	0.352302	1.04872	63
CENPV	1.45457	2.87018	99
CENPVL1	0.803313	11.2339	99
CEP104	1.10585	11.135	99
CEP112	0.508437	12.9707	99
CEP120	0.661929	12.0601	90
CEP128	0.935731	9.82915	81
CEP131	0.691428	-0.702631	99
CEP135	0.968225	9.47541	99
CEP164	1.37263	6.47864	72
CEP170	0.198549	7.91937	99
CEP170B	1.17681	-2.57475	99
CEP192	0.772672	14.195	99
CEP250	0.848056	12.9644	99
CEP290	0.71592	6.61871	99
CEP350	1.0901	11.6388	99
CEP41	1.11564	8.73121	99
CEP44	0.725008	10.1503	99
CEP55	0.644155	14.5151	99
CEP57	0.633094	6.68553	99
CEP63	1.24679	8.94314	63
CEP68	0.939827	12.8946	99
CEP76	1.18816	9.65861	99
CEP78	1.10097	8.701	99
CEP85	0.626534	9.88471	82
CEP89	1.01693	10.9643	71
CEP97	0.767432	6.27882	99
CEPT1	1.00765	10.2465	99
CERCAM	0.715484	8.78658	81
CERK	0.699418	8.90595	99
CERS1	0.813751	8.24785	99
CERS2	0.787048	9.85764	99
CERS4	0.805935	13.9961	99
CERS5	0.770156	9.58658	90
CERS6	0.632522	13.6211	81
CES1	1.25459	-2.34285	99
CES2	0.16787	4.89791	99
CETN2	0.804229	0.610738	99
CETN3	0.872861	6.21164	99
CETP	1.02158	9.68125	62
CFAP20	1.07632	9.69238	99
CFAP298	0.671623	12.4841	99
CFAP36	0.7717	12.9522	99
CFAP52	0.858632	-5.69559	36
CFAP97	0.814737	13.6962	99
CFB	1.34727	7.08093	99
CFD	0.856946	11.1325	99
CFDP1	0.776422	10.5431	99
CFH	1.00689	5.02923	99
CFHR1	0.732363	13.8419	99
CFHR2	0.978579	11.3817	99
CFHR3	0.835332	12.8637	99
CFHR4	1.31004	4.6858	81
CFHR5	1.02252	-6.70993	99
CFI	1.03014	11.3377	99
CFL1	0.883431	13.795	99
CFL2	0.312369	11.4327	99
CFLAR	0.0797947	7.58316	54
CFP	0.98348	2.58847	99
CGAS	0.74714	12.9592	72
CGGBP1	0.830396	6.8006	99
CGN	0.915934	6.67388	99
CGNL1	0.566376	12.9788	99
CGREF1	0.872902	13.2698	99
CGRRF1	0.862228	13.9212	90
CHAC2	0.765275	13.9426	99
CHADL	1.0279	6.39686	91
CHAF1A	0.646887	11.7627	99
CHAF1B	0.693334	8.15712	99
CHAMP1	0.797363	4.25194	99
CHAT	0.836604	1.37368	80
CHCHD1	0.829675	11.9232	81
CHCHD10	0.132868	9.66507	99
CHCHD2	0.371918	-8.21173	99
CHCHD3	0.336921	10.7432	99
CHCHD4	0.380848	-3.91124	99
CHCHD5	0.569328	8.57297	99
CHCHD6	1.22983	10.0289	99
CHCHD7	0.47481	13.454	99
CHD1	0.588589	8.75546	99
CHD1L	0.94616	13.3276	99
CHD2	1.12957	8.80337	99
CHD3	0.607744	2.64066	99
CHD4	0.836308	7.91477	99
CHD5	4.72068	-8.90444	63
CHD6	0.663746	8.39032	99
CHD7	0.941528	-0.883782	99
CHD8	1.86804	0.00320038	99
CHD9	1.4609	2.5181	99
CHDH	0.756388	13.7607	99
CHEK1	0.654916	12.6134	99
CHEK2	0.796177	13.6775	99
CHERP	1.10993	11.2473	99
CHFR	0.933761	10.2509	90
CHGA	1.57024	-2.76335	99
CHGB	1.52497	-1.70219	99
CHI3L1	0.967228	12.5675	99
CHI3L2	1.36195	-10.7143	99
CHIC1	0.560068	10.8468	80
CHIC2	0.713492	6.96823	72
CHID1	0.684886	12.8932	99
CHIT1	1.16197	-15.9124	99
CHKA	0.675251	12.9982	99
CHKB	0.991211	12.1021	99
CHL1	0.773883	12.1244	99
CHM	0.636051	13.6772	99
CHML	0.653682	8.83842	99
CHMP1A	0.522949	13.7169	99
CHMP1B	0.513598	14.0457	99
CHMP2A	0.988952	9.88797	99
CHMP2B	0.676832	10.6206	99
CHMP3	0.593791	13.6509	99
CHMP4A	0.803124	14.2466	99
CHMP4B	0.965963	13.3128	99
CHMP5	0.997109	10.2286	99
CHMP6	0.514759	10.4014	99
CHMP7	0.0901665	9.73787	99
CHN1	0.899834	10.9714	99
CHN2	0.671298	3.01212	99
CHODL	0.941903	-0.904008	45
CHORDC1	0.857575	12.4617	99
CHP1	0.935482	6.49523	99
CHPF	0.818758	8.39464	99
CHPF2	0.581602	5.13181	99
CHPT1	0.670461	14.3336	99
CHRAC1	0.78063	8.7011	81
CHRD	0.668921	14.0449	90
CHRDL1	0.436903	10.4267	54
CHRM1	0.802075	12.8253	90
CHRM3	1.13031	9.80947	99
CHRM4	1.27516	8.59606	81
CHST1	1.31799	8.74431	36
CHST10	1.04832	10.6893	90
CHST11	0.897974	13.3046	99
CHST12	1.01783	11.3197	54
CHST14	1.02403	12.215	99
CHST2	0.485977	6.75866	63
CHST3	1.10228	11.5834	99
CHST6	0.683489	12.5117	71
CHST7	0.909463	11.8909	90
CHST9	0.807047	9.00227	91
CHSY1	1.1428	12.1088	99
CHTF18	0.0991969	8.61841	72
CHTOP	1.02986	1.8227	99
CHUK	0.759621	14.19	99
CHURC1	0.901233	6.47307	63
CIAO1	0.803705	12.4961	99
CIAO2A	0.731238	13.9817	99
CIAO2B	0.830603	10.0799	99
CIAO3	0.753569	13.7776	99
CIAPIN1	0.67709	12.7589	99
CIB1	0.949683	11.1272	99
CIC	0.759719	11.9725	99
CINP	0.853331	14.1487	99
CIP2A	0.884284	13.0759	99
CIR1	0.888769	11.589	99
CIRBP	1.14482	8.91331	99
CISD1	1.1393	9.26078	99
CISD2	0.571574	14.402	99
CISD3	0.558521	9.83784	99
CIT	0.807833	9.70377	99
CITED1	0.953027	3.4633	55
CIZ1	0.959933	-0.0714386	99
CKAP2	0.919843	2.97131	99
CKAP2L	0.6861	11.1058	72
CKAP4	1.08034	5.2989	99
CKAP5	0.682071	14.7137	99
CKB	1.2292	-1.34836	99
CKM	0.945898	-9.88863	54
CKMT1A	1.34036	2.23241	99
CKMT2	0.23342	4.32697	99
CKS1B	0.476198	2.64697	99
CKS2	0.914005	10.4171	63
CLASP1	0.851153	0.222244	99
CLASP2	0.877779	13.1307	99
CLASRP	0.743341	14.1833	99
CLC	0.806362	1.26476	99
CLCC1	0.591866	9.98297	99
CLCN2	0.62238	13.1756	90
CLCN3	0.416905	13.5411	99
CLCN4	0.327394	9.76594	99
CLCN5	0.791744	-0.94321	55
CLCN6	0.703173	14.4388	99
CLCN7	0.608721	13.6306	99
CLDN10	1.39136	1.53679	99
CLDN11	0.770353	-3.12859	99
CLDN12	0.453368	12.2579	54
CLDN5	1.54405	5.47639	81
CLDND1	0.369742	0.827751	99
CLEC11A	0.713089	9.99562	99
CLEC14A	1.24944	5.9965	90
CLEC16A	0.484034	9.36378	99
CLEC18A	1.50048	5.04648	62
CLEC2L	1.36931	4.62906	99
CLEC3B	1.15575	1.08084	99
CLEC5A	0.813825	14.0319	99
CLGN	1.10613	-6.37576	99
CLIC1	0.634049	3.66528	99
CLIC2	0.746481	2.90774	99
CLIC4	1.08081	12.1595	99
CLIC5	0.679707	10.7591	55
CLIC6	0.81791	-7.78379	99
CLINT1	1.05131	12.5631	99
CLIP1	1.174	8.46516	99
CLIP2	0.987728	12.4612	99
CLIP3	0.932512	10.8824	99
CLIP4	0.970734	11.7587	91
CLK1	0.0708488	5.03565	55
CLK2	0.684483	11.8298	73
CLK3	0.972154	12.3557	90
CLK4	1.08962	8.75683	81
CLMN	3.53823	-17.5724	99
CLN5	0.814623	11.9088	99
CLN6	0.62842	8.60977	99
CLN8	0.8214	11.0104	99
CLNS1A	1.00043	8.1599	99
CLOCK	0.507432	12.843	99
CLP 1	1.22153	7.86014	99
CLPB	1.12727	9.92547	99
CLPP	1.04177	12.0078	99
CLPTM1	0.871359	13.3159	99
CLPTM1L	0.243021	6.39672	99
CLPX	1.05235	7.14952	99
CLSPN	0.753855	10.106	43
CLSTN1	1.15873	5.6252	99
CLSTN2	0.379345	9.63122	90
CLSTN3	0.514273	10.7756	99
CLTA	0.709293	13.8653	99
CLTB	1.06934	10.4185	99
CLTC	0.803671	13.9172	99
CLTCL1	0.261521	-1.46305	99
CLU	0.774193	4.51324	99
CLUAP1	0.663256	10.7585	99
CLUH	0.467277	12.0943	99
CLVS1	1.27312	7.6269	89
CLVS2	1.16144	11.0979	99
CLYBL	0.461567	13.984	99
CMAS	0.633817	14.3086	99
CMBL	0.570534	14.0089	99
CMC1	0.565861	14.1116	99
CMC2	0.15565	4.77196	99
CMC4	0.69256	13.2914	99
CMIP	1.05792	12.6358	99
CMPK1	0.887197	12.2126	99
CMPK2	0.821211	-3.49586	99
CMSS1	0.66251	13.7254	99
CMTM3	0.591373	9.48924	90
CMTM4	1.08761	10.2021	99
CMTM5	0.616522	14.1755	99
CMTR1	0.817974	10.6778	99
CMTR2	0.436925	12.2969	90
CNBP	0.383584	-6.66195	99
CNDP1	1.01834	-4.1374	99
CNDP2	0.778785	14.4124	99
CNEP1R1	0.773149	13.2245	72
CNIH3	0.713628	7.32343	99
CNIH4	0.4455	14.3226	99
CNKSR2	1.00922	5.53131	99
CNKSR3	1.00594	10.7862	81
CNN1	0.937786	7.48448	99
CNN2	1.11142	10.5292	99
CNN3	1.02473	12.7567	99
CNNM1	0.501117	14.0141	90
CNNM2	0.877059	10.9592	99
CNNM3	1.1485	7.96827	99
CNNM4	0.632492	10.5919	99
CNOT1	0.760051	12.5872	99
CNOT10	0.906662	12.1614	99
CNOT11	0.983476	11.8036	99
CNOT2	0.459242	3.5255	99
CNOT3	0.84209	12.1639	99
CNOT4	0.700977	12.536	99
CNOT6	0.752892	12.8186	63
CNOT6L	1.37694	0.894824	99
CNOT7	0.737556	14.4777	99
CNOT8	0.883123	13.9884	99
CNOT9	0.741471	11.6236	99
CNP	0.957895	-4.32441	99
CNPY2	1.0306	9.63903	99
CNPY3	0.934977	12.5698	99
CNPY4	0.999346	10.6478	99
CNR1	1.05558	11.3094	99
CNRIP1	0.923244	9.46325	99
CNST	0.328569	8.42847	99
CNTFR	0.923493	12.492	99
CNTLN	1.06702	11.6466	99
CNTN1	1.37497	2.19175	99
CNTN2	0.623523	0.453767	99
CNTN3	0.93788	11.0186	89
CNTN4	0.836573	13.8005	99
CNTN5	1.16907	6.01805	99
CNTN6	1.07582	9.44982	63
CNTNAP1	1.39417	3.11112	99
CNTNAP2	1.35948	2.58993	99
CNTNAP4	0.923074	3.97279	99
CNTNAP5	1.20671	7.7092	99
CNTRL	0.607878	5.56765	99
CNTROB	0.861565	10.2266	99
COA1	0.998468	10.4159	90
COA3	0.592058	9.14536	99
COA4	1.11084	7.51197	99
COA5	0.821173	7.81868	99
COA6	0.668105	10.7901	99
COA7	0.481905	14.3869	99
COASY	0.844967	10.8175	99
COBL	0.234644	-6.06369	99
COBLL1	0.865878	13.6806	99
COG1	0.82212	10.8974	99
COG2	0.772458	14.4971	99
COG3	0.716851	13.5957	99
COG4	0.614345	5.88498	99
COG5	0.75123	14.1271	99
COG6	0.881996	13.4612	99
COG7	0.568142	13.5017	99
COG8	1.11321	11.3937	99
COIL	0.979526	8.95315	99
COL11A1	0.561402	7.02282	90
COL12A1	1.19321	1.0798	99
COL14A1	0.555876	5.28165	99
COL15A1	0.786437	8.82862	99
COL16A1	0.693017	9.28274	99
COL18A1	0.634742	13.3995	99
COL1A1	1.48987	-20.9337	99
COL1A2	1.39714	-5.95603	99
COL20A1	0.999259	-2.41968	99
COL22A1	0.719029	3.56689	72
COL28A1	1.03112	-21.0494	99
COL3A1	1.12856	-1.46193	99
COL4A1	0.838495	10.7803	99
COL4A2	1.01002	11.6828	99
COL4A3BP	1.10187	7.56168	99
COL5A1	0.971079	7.09639	99
COL5A2	1.12497	10.5223	99
COL5A3	0.565737	11.4368	99
COL6A1	1.01244	8.09172	99
COL6A2	1.06513	8.23683	99
COL6A3	1.31359	5.2379	99
COL7A1	0.99996	9.88285	90
COL8A1	1.25425	-3.93091	81
COL9A2	0.746433	13.0902	99
COL9A3	1.2307	4.46066	54
COLEC10	0.530011	13.1431	72
COLEC11	1.09792	3.85874	72
COLEC12	1.06756	10.8084	99
COLGALT1	0.850926	13.6271	99
COLGALT2	0.884548	12.3957	99
COMMD1	0.652835	13.5306	99
COMMD10	0.984881	12.6714	99
COMMD2	0.48046	0.16901	99
COMMD3	0.741236	14.7012	91
COMMD3-BMI1	0.997194	13.7995	99
COMMD4	0.885057	12.1405	99
COMMD5	0.903191	11.0868	99
COMMD6	1.03234	8.44485	99
COMMD7	0.419765	14.1455	99
COMMD8	0.835008	13.0402	99
COMMD9	0.941835	13.056	99
COMP	0.631645	4.87989	99
COMT	1.06471	8.41597	99
COMTD1	0.740691	8.39286	99
COP 1	0.862244	12.3931	81
COPA	0.978674	10.5875	99
COPB1	1.37747	6.69125	99
COPB2	1.01483	10.7427	99
COPE	1.30724	2.89775	99
COPG1	0.682913	10.7231	99
COPG2	1.27293	4.6931	99
COPRS	1.05699	12.4572	99
COPS2	0.573866	14.2959	99
COPS3	0.393341	10.753	99
COPS4	0.596266	13.746	99
COPS5	0.779472	11.1719	99
COPS6	0.525142	14.352	99
COPS7A	0.978825	12.8585	99
COPS7B	0.518573	13.4352	99
COPS8	0.711578	12.9384	99
COPS9	0.40215	12.8312	72
COPZ1	0.525431	13.3149	99
COPZ2	0.895188	12.7458	99
COQ10A	0.727044	13.326	99
COQ10B	0.955528	10.0943	99
COQ3	1.17734	9.90715	99
COQ5	1.08591	10.644	99
COQ6	0.310621	8.10662	99
COQ7	0.715879	11.8368	99
COQ8A	0.944614	12.6524	99
COQ8B	0.87601	8.61558	99
COQ9	1.4858	2.47538	99
CORO1A	1.13	10.2218	99
CORO1B	1.16391	10.7242	99
CORO1C	0.595831	11.5536	99
CORO2A	0.824452	13.4146	99
CORO2B	0.989735	10.748	99
CORO6	0.812592	10.843	99
CORO7	0.909959	9.4506	99
CORO7-PAM16	0.80016	6.08465	99
COTL1	0.71515	9.16151	99
[truncated: 8,704 more rows]

[truncated: 10 more sheets: CPTAC_HNSCC_N, CPTAC_HNSCC_T, CPTAC_LSCC_N, CPTAC_LSCC_T, CPTAC_LUAD_N, CPTAC_LUAD_T, CPTAC_OV_T, CPTAC_PDAC_N, CPTA_PDAC_T, CPTAC_UCEC_T]
