# Supplementary material for: Bimodality in pan-cancer proteomics reveals new opportunities for biomarker discovery
Source: bioRxiv preprint, doi:10.1101/2025.03.03.641218, version 1 (2025-03-09)
Supplement: Supplemental Table 2 [file 641218_file03.xlsx]

## Sheet: Table of Contents
Table of Contents
Table_S2	Pathway_TABP	Pathway enrichment analysis of 2401 TABPs
	pancancer_TABP	TABPs identified in at least 3 indicaitions.
	TROP2_High_vs_low_protein	Differential analysis using proteomics data between patients with higher TROP2 protein abundance and patients with lower TROP2 proteins abundance in COAD.
	TROP2_High_vs_low_RNA	Differential analysis using RNA-seq data between patients with higher TROP2 protein abundance and patients with lower TROP2 proteins abundance in COAD.
	MOFA	MOFA results in COAD.

## Sheet: pathway_TABP
geneSet	description	link	size	overlap	expect	enrichmentRatio	pValue	FDR
hsa00330	Arginine and proline metabolism	http://www.kegg.jp/kegg-bin/show_pathway?hsa00330+1152+1160+26+2805+29920+383+384+4128+4129+4842+4843+501+5033+79814+84735+8974	50	16	6.77711	2.36089	0.000621547	0.0247719
hsa04512	ECM-receptor interaction	http://www.kegg.jp/kegg-bin/show_pathway?hsa04512+1277+1278+1286+1291+1293+22801+2335+255743+3339+3371+341640+3676+3678+3680+3685+3690+3691+3694+3695+3908+3912+3914+3918+7057+7448+7450+8516+961	89	28	12.0633	2.3211	9.56357e-06	0.00168319
hsa05230	Central carbon metabolism in cancer	http://www.kegg.jp/kegg-bin/show_pathway?hsa05230+160287+1956+2064+208+2260+2475+2539+2744+3091+3099+3845+3945+5159+5163+5594+5605+5894+6510+7157+80201+8140	70	21	9.48795	2.21333	0.000257499	0.0151066
hsa04510	Focal adhesion	http://www.kegg.jp/kegg-bin/show_pathway?hsa04510+106821730+1277+1278+1286+1291+1293+1729+1793+1956+2064+208+22801+2335+2534+2885+3371+340156+3676+3678+3680+3685+3690+3691+3694+3695+3725+3908+3912+3914+3918+4660+5159+5228+54776+5501+5578+5594+5601+56034+5894+5908+6093+673+7057+71+7448+7450+7791+8516+857+87+896+91807	203	53	27.5151	1.92622	1.07295e-06	0.000377679
hsa05206	MicroRNAs in cancer	http://www.kegg.jp/kegg-bin/show_pathway?hsa05206+10014+10297+10642+1591+1956+2064+2146+2475+25+27086+2744+2885+3371+3678+3690+3845+4318+4363+4853+4854+5159+5268+5578+5594+5598+5605+5743+578+5894+6093+6541+6774+7057+7157+7329+8091+8626+8660+995	161	39	21.8223	1.78716	0.00016403	0.0115477
hsa04141	Protein processing in endoplasmic reticulum	http://www.kegg.jp/kegg-bin/show_pathway?hsa04141+10130+10134+10294+10483+10802+10808+10956+11231+201595+2081+23471+26232+29927+29979+30001+3301+3326+3337+4121+4287+5071+51009+55432+5601+5609+56605+57134+578+58505+5886+6048+64215+7321+7322+7326+7327+746+80267+823+8720+9978	170	41	23.0422	1.77935	0.000124829	0.0109849
hsa04142	Lysosome	http://www.kegg.jp/kegg-bin/show_pathway?hsa04142+10239+10717+1176+1201+1211+130340+1509+1510+1522+162+1777+23163+23659+2517+26985+3074+3425+3482+3916+3988+410+427+4864+51172+5476+6609+8546+8907+8943+9516+968	132	31	17.8916	1.73266	0.00128366	0.0451848
hsa05205	Proteoglycans in cancer	http://www.kegg.jp/kegg-bin/show_pathway?hsa05205+1277+1278+1634+1956+2064+208+2260+22808+2335+23365+2475+286+2885+3091+3339+3481+3678+3685+3690+3845+4060+4318+4478+4660+54776+5501+5568+5578+5594+5603+5605+5894+6093+6300+673+6774+7057+7074+71+7157+7448+7481+81029+817+8321+8323+857	202	47	27.3795	1.71661	0.000105347	0.0109849
hsa04810	Regulation of actin cytoskeleton	http://www.kegg.jp/kegg-bin/show_pathway?hsa04810+10297+10458+106821730+10787+1729+1793+1956+208+2260+22801+22808+2335+23365+28964+340156+3676+3678+3680+3685+3690+3691+3694+3695+3845+3984+4478+4660+5159+54434+54776+54961+5501+55845+5594+56034+5605+5894+6093+673+7074+71+727+730+7852+79784+8516+87+8874+89846+91807	229	50	31.0392	1.61087	0.00033721	0.0169569
hsa05165	Human papillomavirus infection	http://www.kegg.jp/kegg-bin/show_pathway?hsa05165+10134+1019+10207+10297+1277+1278+1286+1291+1293+182+1856+1956+208+22801+2335+23352+2475+2885+3134+3371+3516+3676+3678+3680+3685+3690+3691+3694+3695+3845+3908+3912+3914+3918+4853+4854+5159+525+528+534+5519+5523+5528+5529+55534+5568+5584+5594+5605+5743+578+5894+6772+6773+7057+7157+7448+7450+7481+81029+8321+8323+8516+8772+896+9794	331	66	44.8645	1.4711	0.000633373	0.0247719

## Sheet: pancancer_TABP
Original Gene List:
IGF2BP3
NDUFA4L2
EPS8L3
PADI4
UCHL1
TLNRD1
MSANTD2
CRMP1
ERN1
STAP1
RPS12
HABP4
KRT6B
MAGEA4
DDX60
HMGA2
Additional Genes from BIKG using GSEA:
CLDN4
VIM
HSPA5
WBP2
UBE2I
TP53
SYNCRIP
DCAF6
ARMC1
FOXO3
ATRX
CD2AP
TRAF3
KRT17
NTAQ1
CAPZA1
POLR2A
DGUOK
UNC13A
Additional Genes from BIKG using Bio Enrichment:
CLDN4
VIM
DCAF6
UQCRB
UBE2I
ATRX
CCDC85B
UNC13A
TP53
All Additional Genes from BIKG Enrichment:
CLDN4
VIM
HSPA5
WBP2
UBE2I
CCDC85B
TP53
SYNCRIP
DCAF6
ARMC1
FOXO3
UQCRB
ATRX
CD2AP
TRAF3
KRT17
NTAQ1
CAPZA1
POLR2A
DGUOK
UNC13A

## Sheet: TROP2_High_vs_low_protein
	ID	logFC	AveExpr	t	P.Value	adj.P.Val	B
TACSTD2	TACSTD2	2.55972	0.102171	13.9822	1.55e-17	1.02e-13	21.3016
CAPS	CAPS	1.18551	-0.141572	4.41316	6.81e-05	0.188616	1.29446
HMGCS2	HMGCS2	1.06862	-0.969156	3.0413	0.00401684	0.358463	-1.94429
GSTP1	GSTP1	0.96149	-0.465098	2.88596	0.00609746	0.390592	-2.27204
SLC39A4	SLC39A4	0.943442	0.125603	3.86981	0.00036748	0.206054	-0.0473343
S100A9	S100A9	-0.856244	-0.249712	-1.88654	0.0660371	0.527539	-4.0871
KRT80	KRT80	0.852448	-0.109437	2.17937	0.0348698	0.467624	-3.61445
POTEJ	POTEJ	0.827219	-1.11419	2.10313	0.0413875	0.477115	-3.7427
ADIRF	ADIRF	0.825122	-1.13722	2.24881	0.0297412	0.466783	-3.4946
COL17A1	COL17A1	0.816905	-0.14327	3.47041	0.0012015	0.331775	-0.98958
SERPINB5	SERPINB5	0.807668	0.21018	1.73596	0.0897853	0.56527	-4.30832
PIGR	PIGR	-0.807296	-0.816249	-2.14371	0.0377965	0.472351	-3.67489
MPST	MPST	0.798523	-0.319193	3.39897	0.00147637	0.331775	-1.15307
C19orf33	C19orf33	0.796882	-0.471012	2.52315	0.0154385	0.439224	-2.99412
WNT11	WNT11	0.77809	0.0839142	2.40996	0.0203387	0.451368	-3.20568
EPB41L1	EPB41L1	0.778031	0.0223122	3.94069	0.000296235	0.206054	0.124272
GDA	GDA	0.773199	-0.149117	2.35967	0.0229357	0.45588	-3.29742
GUCY2C	GUCY2C	0.770242	-0.0370976	3.26817	0.00214198	0.331775	-1.44793
S100A8	S100A8	-0.767243	-0.240954	-1.67412	0.10142	0.586284	-4.39466
POTEF	POTEF	-0.748899	0.116951	-1.27038	0.210831	0.699025	-4.8901
LDHB	LDHB	-0.743533	-0.293571	-3.128	0.00316705	0.351755	-1.75697
KRT23	KRT23	0.73499	0.0498241	1.59471	0.118155	0.611438	-4.50156
CRIP1	CRIP1	0.73242	-0.224756	2.92558	0.00548765	0.383716	-2.18945
TSTD1	TSTD1	0.728902	-0.0917659	3.96901	0.000271679	0.206054	0.193176
MME	MME	0.719866	-0.28388	2.13437	0.0385977	0.475996	-3.69058
TPPP3	TPPP3	0.716934	-0.75878	2.76358	0.00840371	0.419394	-2.52271
GPX7	GPX7	-0.710343	0.0438125	-3.4831	0.00115807	0.331775	-0.960352
PPL	PPL	0.707391	-0.13531	3.22809	0.00239741	0.331775	-1.53706
EPHA2	EPHA2	0.704838	0.199571	2.95315	0.00509733	0.383716	-2.13155
REEP6	REEP6	0.702956	0.205907	2.11531	0.0402795	0.476854	-3.72245
TMSB4X	TMSB4X	0.695958	-0.856076	1.44598	0.155485	0.65692	-4.6895
SELENBP1	SELENBP1	0.682537	-1.27216	2.18115	0.0347296	0.467624	-3.61143
PHGDH	PHGDH	-0.676629	-0.159344	-2.60916	0.0124627	0.439224	-2.82881
NAPRT	NAPRT	0.673483	0.00506585	4.34009	8.58e-05	0.188616	1.1109
FBLN1	FBLN1	-0.670486	-0.00510488	-2.68899	0.0101813	0.434922	-2.67203
LPAR1	LPAR1	-0.668709	-1.37686	-2.4776	0.0172644	0.451368	-3.08009
PTTG1IP	PTTG1IP	0.666491	0.161812	3.34804	0.00170796	0.331775	-1.2686
EPHX2	EPHX2	0.662677	-0.560656	3.06162	0.00380035	0.354842	-1.90067
GPRC5A	GPRC5A	0.651565	0.104417	1.876	0.0675041	0.527539	-4.10308
ZNF185	ZNF185	0.650144	0.0288927	3.43651	0.0013252	0.331775	-1.06737
CSTB	CSTB	0.649353	-0.0875902	2.833	0.00701176	0.406581	-2.38136
RBP1	RBP1	0.638819	-0.299238	2.05236	0.0462989	0.485283	-3.82611
MUC2	MUC2	-0.634265	-0.84952	-1.31082	0.196929	0.684968	-4.846
TMC4	TMC4	0.630637	0.15177	2.58942	0.0130952	0.439224	-2.86709
GGH	GGH	0.621144	-0.184351	1.85393	0.070668	0.531566	-4.13631
DBI	DBI	0.619164	-0.634939	1.61001	0.114767	0.60282	-4.48132
MT1G	MT1G	0.616958	-1.33404	1.38116	0.174419	0.671057	-4.76629
SLPI	SLPI	0.615392	-0.610917	2.13317	0.0387015	0.475996	-3.69259
LYPLA1	LYPLA1	0.610099	-0.12662	2.63721	0.0116125	0.434922	-2.77409
RBKS	RBKS	0.609005	-0.52351	2.35601	0.0231359	0.45588	-3.30404
TSPAN1	TSPAN1	0.602504	-0.19598	1.93328	0.0598526	0.511337	-4.01534
ACAA2	ACAA2	0.601232	-0.197032	2.8239	0.00718127	0.406581	-2.40003
PLOD2	PLOD2	-0.600376	0.295041	-3.4172	0.00140103	0.331775	-1.11152
CCL21	CCL21	-0.599715	-0.160363	-2.58486	0.0132453	0.439224	-2.8759
CD74	CD74	-0.59899	-0.0718293	-2.80029	0.00763847	0.409834	-2.44824
IYD	IYD	-0.596062	-0.343447	-1.91394	0.0623485	0.519641	-4.04521
DCXR	DCXR	0.593642	0.0145805	3.32816	0.00180741	0.331775	-1.31345
OLFM4	OLFM4	-0.589983	-1.05026	-0.977073	0.334038	0.789641	-5.17141
HIST1H1A	HIST1H1A	-0.587063	0.119343	-2.01753	0.0499555	0.494905	-3.88239
CLIC3	CLIC3	0.586266	0.0753505	2.75101	0.00868147	0.419394	-2.54805
HEBP1	HEBP1	0.582554	-0.27141	3.31124	0.00189636	0.331775	-1.35151
HLA-DPA1	HLA-DPA1	-0.580195	-0.470276	-1.98051	0.0541141	0.507238	-3.94137
DPP7	DPP7	0.579235	-0.153341	3.26281	0.00217458	0.331775	-1.45989
GALC	GALC	0.577003	-0.113051	3.02549	0.00419332	0.360548	-1.97813
HDHD3	HDHD3	0.576653	-0.0242927	3.04731	0.00395166	0.358463	-1.93141
RCN3	RCN3	-0.576023	0.105134	-2.81914	0.00727138	0.406581	-2.40977
APOF	APOF	-0.574788	-0.30233	-1.55883	0.12642	0.628104	-4.54838
CKB	CKB	0.572542	-1.51597	1.78664	0.0810995	0.548252	-4.23559
PCBD1	PCBD1	0.570686	-0.336524	2.16643	0.0359079	0.468222	-3.63647
HDGF	HDGF	0.570397	-0.118966	1.95591	0.0570413	0.507238	-3.98008
TMSB10	TMSB10	0.568103	-0.261998	1.71312	0.0939463	0.57262	-4.34052
NQO1	NQO1	-0.566105	0.0145049	-1.40675	0.166742	0.662134	-4.73636
CTHRC1	CTHRC1	-0.565784	0.306932	-1.83975	0.0727658	0.533608	-4.15748
CD164	CD164	0.564367	-0.215472	2.65823	0.0110104	0.434922	-2.73281
CIB1	CIB1	0.563484	0.114907	2.58936	0.0130969	0.439224	-2.8672
LRRC15	LRRC15	-0.560105	0.160872	-1.83422	0.073598	0.534213	-4.1657
CALB2	CALB2	0.559888	-0.759541	1.54847	0.128893	0.635128	-4.56173
TSPAN6	TSPAN6	0.556052	-0.0317585	2.08062	0.0435053	0.480751	-3.77987
ABHD11	ABHD11	0.55423	0.170163	3.29484	0.00198656	0.331775	-1.3883
MXRA5	MXRA5	-0.553034	0.26618	-2.28539	0.0273189	0.466783	-3.43032
SEC11C	SEC11C	-0.551301	-0.231505	-2.75125	0.00867611	0.419394	-2.54757
ADAMDEC1	ADAMDEC1	-0.55002	-0.60616	-2.1155	0.0402619	0.476854	-3.72213
LGALS3BP	LGALS3BP	0.549264	-0.0862829	2.22329	0.0315421	0.466783	-3.53898
CA13	CA13	0.547807	0.144313	2.62697	0.0119164	0.434922	-2.79411
SERPINH1	SERPINH1	-0.546998	0.349037	-3.14305	0.003038	0.351755	-1.72414
SLC2A1	SLC2A1	0.546161	0.039639	1.84242	0.0723672	0.533608	-4.15351
RPS4Y2	RPS4Y2	-0.544223	-0.521295	-1.25098	0.217756	0.70614	-4.91081
DMBT1	DMBT1	-0.543091	-0.854324	-1.2748	0.209276	0.697377	-4.88534
NEU1	NEU1	0.54187	-0.228356	3.24848	0.00226406	0.331775	-1.49179
ZCCHC3	ZCCHC3	0.541095	0.0866002	2.40268	0.0206973	0.451368	-3.21905
CLDN3	CLDN3	0.538753	-0.158968	2.42339	0.0196914	0.451368	-3.18094
KRT19	KRT19	0.538354	0.145488	2.29439	0.0267508	0.465828	-3.41439
RPL22L1	RPL22L1	-0.537214	-0.341822	-1.21341	0.231645	0.71823	-4.95008
HLA-C	HLA-C	-0.537167	-0.105815	-1.97245	0.0550587	0.507238	-3.9541
TSTA3	TSTA3	0.536481	0.022839	2.26188	0.0288545	0.466783	-3.47172
RAB25	RAB25	0.53612	0.0136756	2.70624	0.0097417	0.434296	-2.63773
WDR26	WDR26	0.532594	-0.0762829	2.47194	0.0175043	0.451368	-3.09068
NNMT	NNMT	-0.532505	0.20528	-2.4548	0.01825	0.451368	-3.1227
GZMA	GZMA	-0.531223	-0.653708	-2.19017	0.0340242	0.467624	-3.596
IFI16	IFI16	-0.524562	0.00895854	-3.20964	0.00252443	0.334234	-1.57787
ORM1	ORM1	0.524295	-0.911095	1.20466	0.234971	0.72032	-4.95907
AOC1	AOC1	0.521892	-0.427663	3.06472	0.0037683	0.354842	-1.894
HEBP2	HEBP2	0.520957	-0.311378	2.15762	0.0366301	0.470272	-3.6514
MFAP2	MFAP2	-0.520866	0.124085	-1.96795	0.0555918	0.507238	-3.96118
PRSS1	PRSS1	-0.520834	-0.248051	-2.73299	0.00909465	0.42195	-2.58426
BAIAP2	BAIAP2	0.520818	0.291841	2.29422	0.0267616	0.465828	-3.4147
H2AFX	H2AFX	-0.520576	-0.0720415	-1.88505	0.0662429	0.527539	-4.08936
THY1	THY1	-0.517053	0.155776	-3.46972	0.00120389	0.331775	-0.991156
MYO1A	MYO1A	0.516759	-0.456046	2.62649	0.011931	0.434922	-2.79505
PARP14	PARP14	-0.514973	0.0115854	-3.95799	0.000280989	0.206054	0.166345
SSBP1	SSBP1	0.514753	0.23692	2.56694	0.0138508	0.439224	-2.91043
FDFT1	FDFT1	-0.51368	-0.143968	-2.3162	0.0254172	0.464715	-3.37558
POTEI	POTEI	-0.512867	-1.02782	-2.01289	0.0504614	0.495188	-3.88984
EEF1A2	EEF1A2	0.510282	-0.183046	1.75085	0.0871555	0.558708	-4.28713
SYTL1	SYTL1	0.509029	-0.172317	2.54463	0.0146401	0.439224	-2.9532
LAMC2	LAMC2	0.508546	0.18512	2.28549	0.0273128	0.466783	-3.43015
CD9	CD9	0.50817	-0.248932	2.65695	0.0110462	0.434922	-2.73533
KRT9	KRT9	-0.506281	-1.73963	-1.4081	0.166342	0.662134	-4.73475
IGLL5	IGLL5	-0.504795	-0.73268	-2.0815	0.0434208	0.480751	-3.77842
NMNAT3	NMNAT3	0.504166	-0.0667951	1.82939	0.0743326	0.536143	-4.17287
IGF2BP2	IGF2BP2	-0.503607	0.256193	-2.99565	0.00454625	0.370909	-2.04168
CYP2S1	CYP2S1	0.501631	0.233261	2.66698	0.0107686	0.434922	-2.71558
RPIA	RPIA	0.50138	-0.000509756	2.25343	0.0294248	0.466783	-3.48652
TMEM70	TMEM70	0.498813	0.12559	2.21257	0.0323279	0.466783	-3.55752
ST6GAL1	ST6GAL1	-0.498081	0.0121105	-2.19782	0.0334359	0.466783	-3.58289
NUBPL	NUBPL	0.497025	-0.133144	2.17031	0.035594	0.467912	-3.62988
GBP5	GBP5	-0.495546	0.00453463	-1.7804	0.0821295	0.550701	-4.24464
ELANE	ELANE	-0.494726	-0.158317	-1.13051	0.264575	0.740548	-5.03281
CYP7B1	CYP7B1	-0.493942	0.0608417	-2.52043	0.0155422	0.439224	-2.99927
CTSK	CTSK	-0.493326	0.240665	-2.86947	0.00636959	0.400253	-2.30623
GOLIM4	GOLIM4	-0.493313	-0.0210195	-3.24149	0.00230893	0.331775	-1.50731
RNASET2	RNASET2	0.492914	-0.469802	1.87502	0.0676428	0.527539	-4.10457
CRTAP	CRTAP	-0.492394	0.287085	-3.08853	0.0035304	0.352933	-1.84261
CTSZ	CTSZ	0.491946	-0.558024	1.52965	0.13348	0.641307	-4.58577
MRC2	MRC2	-0.491521	0.0414707	-2.56584	0.0138888	0.439224	-2.91255
C21orf33	C21orf33	0.491377	-0.439702	1.8822	0.0666375	0.527539	-4.09368
HELLS	HELLS	-0.48873	0.244459	-2.78536	0.0079416	0.415559	-2.47861
AMY2A	AMY2A	-0.488581	-1.1556	-1.22386	0.227718	0.715308	-4.93927
AHCY	AHCY	0.487753	-0.151163	2.18237	0.0346329	0.467624	-3.60933
MMP2	MMP2	-0.487391	0.129959	-2.53261	0.0150822	0.439224	-2.97613
ACY1	ACY1	0.487191	-0.000246341	2.41272	0.0202039	0.451368	-3.2006
KRT8	KRT8	0.487152	0.215695	2.17416	0.0352849	0.467912	-3.62334
GGCT	GGCT	0.48697	-0.0329634	2.3199	0.0251973	0.464715	-3.36898
ESPN	ESPN	0.486915	-0.322154	2.19528	0.0336304	0.466783	-3.58725
AGR3	AGR3	0.484427	-0.562756	1.49626	0.141945	0.647376	-4.62779
CD48	CD48	-0.483274	-0.636172	-2.53875	0.0148546	0.439224	-2.96441
DGAT1	DGAT1	0.481759	-0.0984512	2.47215	0.0174953	0.451368	-3.09029
SULT2B1	SULT2B1	0.481482	0.139305	2.3712	0.0223153	0.45588	-3.27651
NENF	NENF	0.481297	-0.0440463	2.80956	0.00745589	0.409834	-2.42935
NIPSNAP1	NIPSNAP1	0.478236	0.156632	3.27905	0.00207719	0.331775	-1.42362
GBP1	GBP1	-0.477931	0.0130195	-1.71614	0.0933865	0.57131	-4.33628
GYPC	GYPC	-0.477817	-0.62989	-2.58439	0.0132607	0.439224	-2.8768
TST	TST	0.477811	-0.190115	3.32505	0.00182345	0.331775	-1.32045
HTRA1	HTRA1	-0.477302	-0.125805	-1.58619	0.120078	0.617116	-4.51277
MBOAT2	MBOAT2	0.476007	-0.0341452	2.26984	0.0283262	0.466783	-3.45774
GGT1	GGT1	0.475848	-0.0323233	1.96232	0.0562656	0.507238	-3.97003
KHK	KHK	0.475736	-0.260276	2.32114	0.0251238	0.464715	-3.36676
METTL17	METTL17	0.475591	0.0156067	2.24551	0.029969	0.466783	-3.50037
GBA2	GBA2	-0.475354	-0.327053	-2.79654	0.0077137	0.410444	-2.45589
CORO2B	CORO2B	0.475324	-0.183329	2.6396	0.0115424	0.434922	-2.7694
ASL	ASL	0.475038	-0.0530171	3.06291	0.00378692	0.354842	-1.89788
FABP5	FABP5	0.474249	-0.40989	2.59281	0.0129843	0.439224	-2.86052
USP6NL	USP6NL	0.47396	0.0538591	3.17372	0.00279028	0.347363	-1.65698
DNAJC3	DNAJC3	-0.473934	0.149022	-3.32328	0.00183263	0.331775	-1.32443
HLA-DQB1	HLA-DQB1	-0.473542	-0.0752951	-1.37858	0.175206	0.671057	-4.76927
NAA16	NAA16	0.472837	-0.346396	1.95296	0.0574011	0.507238	-3.9847
CNN3	CNN3	-0.469744	0.0962293	-2.76792	0.00830965	0.419394	-2.51394
MYH10	MYH10	-0.467368	0.108798	-2.20776	0.0326852	0.466783	-3.5658
RIDA	RIDA	0.467226	-0.0299976	2.35135	0.0233932	0.45588	-3.31246
KCTD14	KCTD14	-0.466413	-0.00464309	-2.35095	0.0234154	0.45588	-3.31319
ISCA2	ISCA2	0.464975	-0.206714	3.49244	0.0011271	0.331775	-0.938823
CD5	CD5	-0.464655	-0.154327	-2.73666	0.00900915	0.42195	-2.57691
CASP1	CASP1	-0.464635	-0.18678	-2.58289	0.0133107	0.439224	-2.87971
PM20D2	PM20D2	0.463636	-0.410529	1.55301	0.127804	0.631649	-4.55589
MTTP	MTTP	-0.461163	-0.45877	-1.17205	0.247676	0.729212	-4.99203
IKBIP	IKBIP	-0.461108	0.2927	-2.89571	0.00594177	0.388133	-2.25178
CLDN7	CLDN7	0.46023	-0.226093	3.09387	0.00347905	0.352933	-1.83106
TUBA3C	TUBA3C	-0.459939	-0.85869	-1.77336	0.0833032	0.553451	-4.25481
CDH17	CDH17	0.459209	-0.241151	1.90565	0.0634451	0.520361	-4.05793
PPP1R13L	PPP1R13L	0.459064	0.284595	3.68008	0.000649379	0.300089	-0.500506
DLD	DLD	0.458458	-0.187032	2.7625	0.00842708	0.419394	-2.52488
TRIM72	TRIM72	-0.458246	-0.0188492	-1.11212	0.27231	0.744807	-5.05042
SRI	SRI	0.456281	-0.347122	2.11477	0.0403281	0.476854	-3.72335
AGMAT	AGMAT	0.45573	0.0291976	2.06897	0.0446388	0.480751	-3.79899
EFEMP1	EFEMP1	-0.455023	0.137873	-1.87551	0.0675731	0.527539	-4.10382
PPOX	PPOX	0.454508	0.0966732	4.19418	0.000135508	0.206054	0.746966
MGP	MGP	-0.454007	-0.625386	-1.50563	0.139526	0.645978	-4.61608
S100A11	S100A11	0.453678	0.381132	3.13792	0.00308148	0.351755	-1.73535
TAP2	TAP2	-0.453665	0.0689244	-2.05813	0.0457162	0.485283	-3.81671
GPX2	GPX2	0.453366	0.0502756	1.66564	0.103109	0.589089	-4.40629
CKAP4	CKAP4	-0.45321	0.19878	-3.20845	0.00253284	0.334234	-1.5805
S100A6	S100A6	0.452923	0.0701659	2.41273	0.0202035	0.451368	-3.20058
FNDC1	FNDC1	-0.452058	-0.0388073	-1.86602	0.0689198	0.528352	-4.11815
ETHE1	ETHE1	0.450777	-0.388715	2.08142	0.0434293	0.480751	-3.77857
ABO	ABO	0.450319	-0.325521	2.09208	0.042416	0.480657	-3.76099
PROM1	PROM1	0.450229	0.0594683	1.47597	0.147291	0.652454	-4.65292
RWDD1	RWDD1	-0.449067	0.187102	-3.34416	0.00172694	0.331775	-1.27736
MYH14	MYH14	0.445706	0.0673878	2.72598	0.00926023	0.42195	-2.59831
MED8	MED8	-0.44521	-0.0113504	-2.31406	0.0255457	0.464715	-3.37941
BST2	BST2	-0.444923	-0.190088	-2.18785	0.0342043	0.467624	-3.59997
THBS2	THBS2	-0.44048	-0.0468439	-1.00791	0.319176	0.779394	-5.14509
MANBAL	MANBAL	-0.439043	-0.0619176	-2.99506	0.00455344	0.370909	-2.04292
SPCS2	SPCS2	-0.438858	0.0318341	-3.00736	0.00440449	0.368569	-2.01677
GUCY1A3	GUCY1A3	-0.437962	-0.250776	-2.93905	0.0052935	0.383716	-2.16119
RCN1	RCN1	-0.437752	0.145305	-2.36189	0.0228151	0.45588	-3.2934
DPEP1	DPEP1	0.43761	-0.383883	0.798042	0.429264	0.843278	-5.30877
CPXM2	CPXM2	-0.437168	-0.167675	-3.09889	0.00343146	0.352933	-1.82021
GCSH	GCSH	0.437026	-0.103405	2.26813	0.0284391	0.466783	-3.46075
CPS1	CPS1	-0.436635	-1.37988	-0.851914	0.399017	0.822292	-5.27024
NCALD	NCALD	-0.436072	-0.53512	-2.4808	0.01713	0.451368	-3.07408
MYEF2	MYEF2	-0.436038	-0.399122	-1.8673	0.0687361	0.528352	-4.11621
SCCPDH	SCCPDH	0.435924	0.0093	2.5694	0.0137663	0.439224	-2.90571
IGFBP5	IGFBP5	-0.434913	-0.163669	-2.47979	0.017172	0.451368	-3.07596
P3H1	P3H1	-0.434585	0.345822	-2.84895	0.00672376	0.406581	-2.34857
MOXD1	MOXD1	-0.434537	-0.095084	-1.94464	0.0584269	0.507238	-3.99769
RAB34	RAB34	-0.434184	-0.296124	-2.87043	0.00635344	0.400253	-2.30424
DDT	DDT	0.433219	-0.5199	1.78886	0.080736	0.548117	-4.23236
ERBB3	ERBB3	0.433118	-0.106279	3.15999	0.00289873	0.347742	-1.68709
AKR1B10	AKR1B10	0.432857	-1.02817	1.62733	0.111028	0.599613	-4.45819
ALDH5A1	ALDH5A1	0.432814	0.068661	1.99552	0.0523935	0.499556	-3.91757
GDPD3	GDPD3	0.432684	-0.444405	1.7011	0.0961994	0.577022	-4.35732
GPX8	GPX8	-0.432365	0.181378	-2.55251	0.0143567	0.439224	-2.93812
ERAP2	ERAP2	-0.432165	-0.241134	-1.46224	0.150999	0.655453	-4.66975
ACSF2	ACSF2	0.431966	-0.3267	1.90622	0.063369	0.520361	-4.05706
SH3BP5L	SH3BP5L	-0.431644	-0.136026	-1.76179	0.085265	0.55508	-4.27146
HLA-DRA	HLA-DRA	-0.430805	-0.0911512	-1.9115	0.0626696	0.519641	-4.04896
ADAP1	ADAP1	0.430371	0.121834	2.89829	0.00590117	0.388133	-2.2464
ABCB1	ABCB1	-0.430177	-0.140363	-1.80434	0.0782371	0.54395	-4.20977
GPA33	GPA33	0.430067	-0.595995	1.35344	0.18304	0.673044	-4.79815
MPO	MPO	-0.429437	-0.106607	-1.1296	0.264954	0.740548	-5.03369
TTI2	TTI2	0.429394	0.0106825	2.31827	0.0252941	0.464715	-3.37189
SORT1	SORT1	-0.429274	0.0244878	-3.04098	0.00402035	0.358463	-1.94498
C1orf116	C1orf116	0.428929	0.278571	2.83009	0.00706557	0.406581	-2.38734
EFNB2	EFNB2	0.427742	-0.0487805	2.5161	0.0157091	0.439224	-3.00749
C8orf82	C8orf82	0.426656	-0.000843902	3.16492	0.00285933	0.347742	-1.67629
CES1	CES1	0.4266	-0.943434	1.47173	0.148428	0.652796	-4.65813
FBLN2	FBLN2	-0.426422	0.102395	-1.45533	0.152893	0.656872	-4.67817
C4BPB	C4BPB	-0.426128	-0.316434	-1.55002	0.128521	0.633766	-4.55974
SI	SI	-0.425906	-1.1138	-1.62967	0.110529	0.599613	-4.45505
BPI	BPI	-0.425722	-0.120951	-0.926063	0.35962	0.802968	-5.21325
VCAM1	VCAM1	-0.425236	-0.180208	-2.92304	0.00552486	0.383716	-2.19475
DECR1	DECR1	0.425176	-0.00307805	2.46034	0.0180057	0.451368	-3.11236
UPP1	UPP1	-0.42487	0.0567951	-2.11981	0.0398764	0.476854	-3.71494
CD2	CD2	-0.423855	-0.107673	-2.40442	0.0206112	0.451368	-3.21586
JPH1	JPH1	-0.423823	0.0271082	-1.43456	0.158699	0.658955	-4.70326
GSS	GSS	0.422852	-0.259698	1.5935	0.118428	0.611892	-4.50316
VCAN	VCAN	-0.422762	0.213183	-1.49364	0.142627	0.647483	-4.63106
TUFM	TUFM	0.422492	0.147761	2.68403	0.010311	0.434922	-2.68187
PRR15	PRR15	0.422288	-0.162146	1.81413	0.0766906	0.540768	-4.1954
UBE2L6	UBE2L6	-0.422214	0.059022	-2.16717	0.0358474	0.468222	-3.63521
TXN	TXN	0.421952	-0.535595	1.0505	0.299401	0.766568	-5.10746
PCK2	PCK2	0.42164	-0.0525293	2.16413	0.0360948	0.46963	-3.64037
CD109	CD109	-0.41972	-0.403924	-2.33159	0.0245126	0.464715	-3.34803
MFAP4	MFAP4	-0.419703	-0.311649	-1.03461	0.306676	0.77113	-5.12167
CLIC6	CLIC6	-0.419591	-0.0752585	-2.10771	0.0409678	0.477115	-3.7351
DOK2	DOK2	-0.418863	-0.124638	-2.89715	0.00591918	0.388133	-2.24879
LPA	LPA	-0.418695	-0.50998	-1.1729	0.247338	0.729212	-4.99118
PCBD2	PCBD2	0.418423	0.0224451	3.22917	0.00239016	0.331775	-1.53466
CLDN4	CLDN4	0.418128	-0.139124	2.2476	0.0298248	0.466783	-3.49672
COPZ2	COPZ2	-0.417066	-0.0378854	-2.04188	0.0473742	0.48946	-3.84313
ACSL5	ACSL5	0.416638	-0.0837366	1.69334	0.0976782	0.579384	-4.36811
ANTXR1	ANTXR1	-0.416545	0.194846	-2.0288	0.0487462	0.491034	-3.86427
YWHAZ	YWHAZ	0.415691	0.0751585	3.9154	0.000319959	0.206054	0.0629267
PARL	PARL	0.41356	-0.180242	2.53632	0.0149444	0.439224	-2.96905
PCOLCE	PCOLCE	-0.41318	0.0175927	-2.14685	0.0375301	0.472351	-3.66959
VILL	VILL	0.412993	-0.170202	2.24542	0.029975	0.466783	-3.50052
GP2	GP2	-0.41269	-0.564026	-1.15789	0.253348	0.734118	-5.00609
GUK1	GUK1	0.412578	-0.143234	1.76142	0.0853288	0.55508	-4.272
PREP	PREP	0.412215	-0.347395	1.75274	0.0868268	0.558708	-4.28443
PPA1	PPA1	0.411545	-0.083539	1.38273	0.17394	0.671057	-4.76446
RBSN	RBSN	-0.411366	-0.255934	-2.91574	0.00563359	0.387192	-2.21003
ANXA13	ANXA13	0.411056	-0.216024	1.30774	0.197963	0.685184	-4.8494
C11orf96	C11orf96	-0.410727	-0.212718	-2.2507	0.0296117	0.466783	-3.4913
AGFG2	AGFG2	0.410638	-0.163454	2.58999	0.0130763	0.439224	-2.86598
ARSA	ARSA	0.40937	-0.489398	1.96162	0.0563498	0.507238	-3.97113
XYLB	XYLB	0.408056	-0.0601163	2.63631	0.0116388	0.434922	-2.77584
IGF2R	IGF2R	-0.408056	0.144383	-3.53791	0.000987235	0.331775	-0.833571
LOXL1	LOXL1	-0.407733	0.0378976	-2.45625	0.0181857	0.451368	-3.11999
MTMR11	MTMR11	0.407435	-0.0119102	1.405	0.167257	0.662134	-4.73841
TSPO	TSPO	0.407378	0.120024	2.52188	0.0154869	0.439224	-2.99653
FIS1	FIS1	0.406577	0.0911268	2.21763	0.0319551	0.466783	-3.54878
CSRP2	CSRP2	-0.406041	0.0475878	-2.75929	0.00849749	0.419394	-2.53136
CST3	CST3	0.405932	-0.34658	1.90863	0.0630482	0.520361	-4.05335
CPD	CPD	-0.405875	0.0340024	-2.28747	0.0271868	0.466783	-3.42665
TATDN1	TATDN1	0.405426	-0.190385	2.15116	0.0371677	0.470272	-3.66232
COX6A1	COX6A1	-0.405336	0.0569488	-2.2051	0.0328846	0.466783	-3.57038
VIM	VIM	-0.405187	-0.151756	-2.44745	0.0185785	0.451368	-3.13638
ALDH1A1	ALDH1A1	0.40491	-1.2568	1.26654	0.212186	0.700606	-4.89422
SDHC	SDHC	0.403884	0.0273732	2.22	0.0317812	0.466783	-3.54467
ESRP1	ESRP1	0.403827	0.0891512	2.93152	0.00540121	0.383716	-2.177
LAMB3	LAMB3	0.403585	0.219673	2.0521	0.0463255	0.485283	-3.82653
PDCD5	PDCD5	0.402495	-0.0994756	2.21911	0.0318463	0.466783	-3.54621
FKBP4	FKBP4	0.402291	0.118239	2.64207	0.0114706	0.434922	-2.76456
ECI1	ECI1	0.4021	-0.250834	2.0308	0.0485343	0.489647	-3.86105
BPNT1	BPNT1	0.401657	-0.177922	2.50383	0.0161902	0.444647	-3.03071
PPP1R18	PPP1R18	-0.400703	-0.011478	-2.37108	0.0223218	0.45588	-3.27673
TAP1	TAP1	-0.400657	0.142063	-1.9229	0.0611802	0.515539	-4.03139
SH3PXD2B	SH3PXD2B	-0.397557	0.151766	-3.34654	0.00171527	0.331775	-1.27199
TPI1	TPI1	0.396481	-0.665349	0.960807	0.342061	0.792674	-5.18499
ARF3	ARF3	0.396467	-0.52406	0.948039	0.348446	0.796118	-5.19549
SFRP4	SFRP4	-0.396159	0.20942	-0.956699	0.344107	0.79302	-5.18838
RFLNA	RFLNA	0.394988	-0.244209	2.17015	0.0356067	0.467912	-3.63015
DAPK3	DAPK3	-0.394353	0.0198659	-4.00597	0.000242594	0.206054	0.283342
CPNE1	CPNE1	0.394172	-0.0156463	1.79486	0.0797598	0.548117	-4.22363
TSPAN15	TSPAN15	0.393641	-0.0661317	2.37428	0.0221522	0.45588	-3.27092
FUCA2	FUCA2	0.392068	-0.132327	2.37022	0.0223677	0.45588	-3.2783
GPD1	GPD1	-0.391711	-0.561163	-1.1615	0.251893	0.732153	-5.00252
DFNA5	DFNA5	-0.39164	-0.0593242	-1.96543	0.055893	0.507238	-3.96515
COL12A1	COL12A1	-0.391418	0.292941	-1.37959	0.174896	0.671057	-4.7681
SOD1	SOD1	0.391075	-0.618029	1.24426	0.220195	0.707425	-4.91792
IGF2BP3	IGF2BP3	-0.390944	0.323127	-1.21829	0.229806	0.716396	-4.94505
FUCA1	FUCA1	0.390896	-1.04976	1.70406	0.0956408	0.57524	-4.35319
POSTN	POSTN	-0.390536	0.0573195	-1.06548	0.292647	0.760056	-5.09387
ACADVL	ACADVL	0.390288	-0.0941707	3.40761	0.00144019	0.331775	-1.13339
CTSC	CTSC	0.390036	-0.321029	1.51489	0.137171	0.644383	-4.60445
PARVB	PARVB	-0.39003	-0.219735	-2.6745	0.0105644	0.434922	-2.70072
SYVN1	SYVN1	-0.390001	-0.00975366	-2.92997	0.00542367	0.383716	-2.18025
NTM	NTM	-0.389998	-0.4865	-1.79102	0.080382	0.548117	-4.22921
ERN2	ERN2	0.389686	-0.0465661	1.89023	0.0655296	0.526632	-4.08149
SDC1	SDC1	0.388977	-0.00953659	2.50882	0.0159929	0.443365	-3.02127
PODXL	PODXL	0.388861	-0.0832902	2.01396	0.050344	0.495188	-3.88812
LDHAL6B	LDHAL6B	-0.3882	-0.122015	-1.08167	0.285473	0.75312	-5.07899
CTSH	CTSH	0.387253	-0.100246	1.6528	0.105709	0.594266	-4.4238
DDX10	DDX10	-0.387054	0.00361301	-1.77355	0.0832726	0.553451	-4.25454
PTGR2	PTGR2	0.387042	-0.180761	2.4156	0.0200645	0.451368	-3.1953
TPPP	TPPP	0.387038	-1.07863	2.30595	0.0260365	0.465552	-3.39386
FBN2	FBN2	-0.386764	-0.0499244	-1.65291	0.105687	0.594266	-4.42365
PRAF2	PRAF2	-0.386377	-0.0195488	-2.84379	0.0068157	0.406581	-2.35919
LYPD8	LYPD8	0.386146	-0.679649	1.09245	0.280761	0.753034	-5.06896
SLC44A4	SLC44A4	0.385621	-0.122997	1.40714	0.166625	0.662134	-4.73589
ANXA6	ANXA6	-0.38519	-0.338798	-2.27437	0.0280295	0.466783	-3.44977
POF1B	POF1B	0.385119	0.0676415	1.56061	0.126001	0.627322	-4.54609
ARMCX2	ARMCX2	-0.384152	-0.281237	-2.54199	0.014736	0.439224	-2.95823
DYNLRB1	DYNLRB1	0.383394	-0.454012	1.5086	0.138767	0.645747	-4.61235
PLEK	PLEK	-0.383172	-0.054161	-1.95704	0.0569034	0.507238	-3.97831
SDHD	SDHD	0.383138	0.0623207	2.17384	0.0353103	0.467912	-3.62388
FKBP10	FKBP10	-0.383089	0.213329	-1.69915	0.0965682	0.577572	-4.36003
MARVELD1	MARVELD1	-0.382975	0.0611549	-1.87912	0.0670675	0.527539	-4.09836
BCAT2	BCAT2	0.382615	-0.141049	3.03202	0.00411956	0.360548	-1.96416
ATP8B1	ATP8B1	0.380844	-0.2758	2.24978	0.0296746	0.466783	-3.49291
BROX	BROX	0.379953	0.126773	2.22402	0.0314896	0.466783	-3.53772
TSPAN7	TSPAN7	0.379594	-0.504871	1.53123	0.133092	0.640608	-4.58377
SLC39A7	SLC39A7	-0.37946	0.115198	-2.688	0.0102069	0.434922	-2.67398
ITGAX	ITGAX	-0.379394	0.143112	-1.83562	0.0733865	0.534213	-4.16362
SPN	SPN	-0.379256	-0.0326931	-2.43585	0.0191076	0.451368	-3.1579
PTP4A1	PTP4A1	-0.378487	-0.333151	-2.19106	0.033955	0.467624	-3.59447
PLCB2	PLCB2	-0.378478	-0.111277	-2.53627	0.0149463	0.439224	-2.96915
SCRIB	SCRIB	0.377728	0.106966	3.83758	0.000405114	0.206054	-0.124963
SDR16C5	SDR16C5	0.377664	0.0793372	1.30389	0.199259	0.685936	-4.85364
IARS2	IARS2	0.377602	0.14212	2.65772	0.0110247	0.434922	-2.73382
CWC25	CWC25	-0.377139	-0.819218	-1.11601	0.270662	0.743324	-5.04672
SPINK1	SPINK1	0.376933	-0.972175	1.015	0.315826	0.77523	-5.13893
SPINT2	SPINT2	0.376855	0.110758	2.46887	0.0176359	0.451368	-3.09643
NUTF2	NUTF2	0.376495	-0.0763829	2.64433	0.0114052	0.434922	-2.76013
BPHL	BPHL	0.376369	0.0691707	1.68503	0.0992819	0.582796	-4.37962
PRSS8	PRSS8	0.376087	0.0761439	2.32533	0.0248768	0.464715	-3.35925
CEP170B	CEP170B	0.375769	-0.0579985	3.43492	0.0013313	0.331775	-1.07101
CDC42BPG	CDC42BPG	0.375078	0.0562957	2.2255	0.0313824	0.466783	-3.53515
MTX1	MTX1	0.37412	0.0871146	3.66346	0.000682227	0.300089	-0.539761
DPYSL3	DPYSL3	-0.37354	-0.468012	-1.421	0.162581	0.662134	-4.71947
NEXN	NEXN	-0.372409	-0.484339	-1.72409	0.0919274	0.566402	-4.3251
HPF1	HPF1	-0.37205	0.0426024	-3.18298	0.00271935	0.347363	-1.63664
TARS2	TARS2	0.371741	0.122861	2.20108	0.0331881	0.466783	-3.57729
LMCD1	LMCD1	-0.371369	0.225727	-2.23311	0.0308385	0.466783	-3.52196
ENTPD1	ENTPD1	-0.371341	-0.145617	-2.53243	0.0150888	0.439224	-2.97646
CTBS	CTBS	0.371257	-0.323197	1.31516	0.195477	0.683859	-4.84118
REXO4	REXO4	0.37118	0.1185	2.25314	0.0294451	0.466783	-3.48704
MNDA	MNDA	-0.370408	0.00978781	-1.22375	0.22776	0.715308	-4.93939
SARS2	SARS2	0.370401	-0.0165488	3.11313	0.00329962	0.351755	-1.78931
GUCY1B3	GUCY1B3	-0.370332	-0.143627	-2.18568	0.0343734	0.467624	-3.60368
PLEKHA6	PLEKHA6	0.370061	0.0385049	2.26926	0.0283645	0.466783	-3.45876
HIBCH	HIBCH	0.369941	-0.16329	2.19526	0.0336321	0.466783	-3.58729
LGALSL	LGALSL	0.369936	-0.205728	2.15336	0.0369837	0.470272	-3.6586
ABHD14B	ABHD14B	0.369857	-0.190524	2.49077	0.0167172	0.450203	-3.05534
SLC25A1	SLC25A1	0.369806	0.0692488	2.80021	0.00764012	0.409834	-2.4484
BSPRY	BSPRY	0.369507	0.0435488	1.85715	0.0701977	0.529707	-4.13147
ECHS1	ECHS1	0.368809	-0.208495	1.85087	0.0711159	0.532209	-4.14088
QKI	QKI	-0.368251	-0.00952927	-2.74982	0.00870823	0.419394	-2.55045
CA9	CA9	-0.367756	-0.20316	-1.20994	0.232959	0.718903	-4.95365
HMGCS1	HMGCS1	-0.3675	-0.182949	-1.51006	0.138395	0.645747	-4.61052
PACSIN3	PACSIN3	0.367056	-0.644805	1.99192	0.0528024	0.502004	-3.9233
ST6GALNAC1	ST6GALNAC1	0.366785	-0.576605	1.32837	0.191115	0.680507	-4.82646
HTRA3	HTRA3	-0.366059	0.259887	-1.61196	0.114342	0.60282	-4.47873
SOAT1	SOAT1	-0.365855	0.0750561	-2.34958	0.0234915	0.45588	-3.31566
FCER1G	FCER1G	-0.365806	0.224451	-1.70526	0.095414	0.574924	-4.35151
LSR	LSR	0.365673	0.0900415	3.4182	0.00139698	0.331775	-1.10922
HINT1	HINT1	0.364612	-0.43232	1.50915	0.138626	0.645747	-4.61166
L2HGDH	L2HGDH	0.364399	0.0628463	2.31724	0.0253556	0.464715	-3.37373
KRT18	KRT18	0.363701	0.29058	1.40542	0.167132	0.662134	-4.73791
COL8A1	COL8A1	-0.363608	0.156358	-1.43588	0.158325	0.658955	-4.70168
COL21A1	COL21A1	0.363235	-1.34628	1.41579	0.164093	0.662134	-4.72566
SYNE3	SYNE3	-0.363222	-0.130902	-3.27662	0.00209148	0.331775	-1.42905
LCP1	LCP1	-0.362678	-0.0617122	-1.94893	0.0578952	0.507238	-3.99098
CYLD	CYLD	-0.362652	-0.104599	-3.07855	0.00362836	0.354842	-1.86418
TMEM165	TMEM165	-0.362573	0.289317	-2.12933	0.0390366	0.47643	-3.69904
GIMAP1-GIMAP5	GIMAP1-GIMAP5	-0.362568	-0.191904	-2.41984	0.0198606	0.451368	-3.18749
CAB39L	CAB39L	0.362545	-0.422095	1.35226	0.183414	0.673044	-4.79949
SPTBN2	SPTBN2	0.361672	-0.355859	1.24686	0.219246	0.706685	-4.91517
LCP2	LCP2	-0.361429	-0.00335366	-2.72488	0.00928666	0.42195	-2.60052
LTBP1	LTBP1	-0.360546	0.302468	-1.50294	0.140218	0.647319	-4.61945
ATRAID	ATRAID	0.36035	0.214573	2.61617	0.0122452	0.439224	-2.81518
TRIM22	TRIM22	-0.35977	-0.0781146	-2.16162	0.0363006	0.46963	-3.64463
MECR	MECR	0.359494	0.171741	2.63141	0.0117839	0.434922	-2.78544
NAIP	NAIP	-0.359457	-0.133419	-2.33996	0.0240327	0.463649	-3.333
MMRN2	MMRN2	-0.35915	-0.25291	-2.57278	0.0136508	0.439224	-2.8992
RPL26L1	RPL26L1	-0.359138	0.110059	-1.81491	0.0765686	0.540768	-4.19425
MTPAP	MTPAP	0.358846	0.152359	2.36327	0.0227403	0.45588	-3.2909
VDAC1	VDAC1	0.358249	0.295946	2.10996	0.0407625	0.477115	-3.73135
SCO2	SCO2	0.358069	0.0679537	3.05988	0.0038184	0.354842	-1.9044
HIST2H2AA4	HIST2H2AA4	0.357579	-0.294741	1.01327	0.316639	0.775783	-5.14043
PPWD1	PPWD1	-0.35755	-0.0771146	-2.26292	0.0287854	0.466783	-3.46991
PTER	PTER	0.357162	-0.451816	1.35143	0.183678	0.673044	-4.80044
SDC2	SDC2	-0.357052	-0.0243784	-2.34719	0.0236249	0.457118	-3.31997
FAM213B	FAM213B	0.356515	-0.2043	2.7826	0.00799879	0.415559	-2.48421
ALOX5AP	ALOX5AP	-0.356458	-0.013678	-1.64261	0.107811	0.594266	-4.43761
GIMAP4	GIMAP4	-0.356378	-0.183351	-1.86496	0.0690718	0.528352	-4.11974
LIMCH1	LIMCH1	-0.356258	-0.0682213	-2.06097	0.0454319	0.484893	-3.81208
CYP3A5	CYP3A5	0.356256	-0.203278	2.00972	0.0508097	0.495188	-3.89492
CXCL14	CXCL14	-0.356106	-0.137769	-1.08687	0.283196	0.75312	-5.07417
CD5L	CD5L	-0.355619	-0.576444	-1.47321	0.14803	0.652796	-4.65631
HBG2	HBG2	-0.355271	-2.94505	-0.799695	0.428316	0.843264	-5.30763
ALKBH5	ALKBH5	-0.354744	-0.203607	-1.76317	0.0850303	0.55508	-4.26949
EPM2AIP1	EPM2AIP1	-0.35465	-0.241139	-2.16743	0.0358265	0.468222	-3.63477
HMGCL	HMGCL	0.353998	-0.0766244	2.39372	0.0211468	0.45588	-3.23546
MUC13	MUC13	0.353782	0.0761	1.49859	0.14134	0.647319	-4.62489
C15orf48	C15orf48	0.353156	-0.839134	1.35655	0.182055	0.672054	-4.7946
CRABP1	CRABP1	0.352182	-1.16346	1.62915	0.110641	0.599613	-4.45576
HLA-DRB3	HLA-DRB3	-0.351332	-0.282701	-1.05339	0.298087	0.766104	-5.10485
HLA-A	HLA-A	-0.351297	0.0571829	-1.78272	0.081745	0.549978	-4.24128
EVI2B	EVI2B	-0.350818	-0.0760683	-1.89453	0.0649429	0.523831	-4.07494
DLST	DLST	0.350357	-0.0495268	3.35823	0.00165902	0.331775	-1.24556
ITGAL	ITGAL	-0.350267	-0.0503668	-2.06728	0.0448056	0.480751	-3.80177
SDCBP	SDCBP	0.349927	0.0434415	1.66759	0.102719	0.588059	-4.40362
C4B	C4B	-0.34976	-0.356183	-1.13535	0.262563	0.739389	-5.02813
CA4	CA4	-0.349627	-1.23865	-1.58612	0.120093	0.617116	-4.51286
CD99	CD99	-0.349265	-0.297737	-2.19749	0.0334612	0.466783	-3.58346
KRTCAP3	KRTCAP3	0.348997	-0.26745	3.25229	0.00223993	0.331775	-1.48331
HINT2	HINT2	0.34838	-0.316795	1.44571	0.155562	0.65692	-4.68984
RAB3A	RAB3A	0.347717	-0.132278	1.90474	0.0635664	0.520361	-4.05932
ITGA11	ITGA11	-0.34766	0.0775177	-1.36894	0.178179	0.671674	-4.7804
GALE	GALE	0.347617	0.065978	2.2818	0.0275487	0.466783	-3.43667
BET1L	BET1L	-0.347398	0.158195	-2.38584	0.0215493	0.45588	-3.24986
RAC2	RAC2	-0.34639	-0.251202	-1.79526	0.0796938	0.548117	-4.22303
UQCR10	UQCR10	0.346157	-0.204878	1.70798	0.0949043	0.573423	-4.34772
BOK	BOK	-0.346152	-0.0802377	-1.8832	0.0664981	0.527539	-4.09216
P3H3	P3H3	-0.345901	0.270105	-1.69798	0.0967915	0.577572	-4.36166
INPP4B	INPP4B	0.345829	-0.114076	2.25601	0.0292501	0.466783	-3.48202
COMT	COMT	0.345636	0.0955683	2.95041	0.00513496	0.383716	-2.13733
STAT1	STAT1	-0.345528	0.140959	-1.54565	0.129571	0.635818	-4.56534
IVD	IVD	0.345389	-0.0785829	2.40454	0.020605	0.451368	-3.21563
TAX1BP1	TAX1BP1	0.345298	0.162208	3.1097	0.00333095	0.351755	-1.79677
BCAS1	BCAS1	0.344812	-0.798666	1.03699	0.305579	0.769941	-5.11955
AKR7A2	AKR7A2	0.344456	-0.257266	2.17951	0.0348591	0.467624	-3.61422
MEIS1	MEIS1	-0.344342	-0.422774	-2.10716	0.0410178	0.477115	-3.73601
MCAT	MCAT	0.344126	0.0987024	3.44384	0.00129746	0.331775	-1.05057
RTKN	RTKN	0.344102	0.269666	3.17522	0.00277872	0.347363	-1.65371
KCNN4	KCNN4	-0.344054	0.114826	-1.29148	0.203487	0.690151	-4.86725
CDK4	CDK4	-0.343705	0.0306683	-3.10668	0.00335868	0.351755	-1.8033
ATP5S	ATP5S	0.343489	0.080978	2.07101	0.0444389	0.480751	-3.79566
PHPT1	PHPT1	0.342932	-0.402632	1.38862	0.172151	0.668541	-4.7576
RMND1	RMND1	0.34273	0.119847	2.44158	0.0188446	0.451368	-3.14728
CFHR2	CFHR2	-0.342366	-0.491782	-1.11966	0.269119	0.742327	-5.04323
PPT1	PPT1	0.342214	0.0346732	2.25228	0.0295033	0.466783	-3.48854
PDCD6	PDCD6	0.342132	0.0949366	3.45154	0.00126893	0.331775	-1.03293
ERAP1	ERAP1	-0.341667	-0.0197439	-2.57912	0.0134366	0.439224	-2.88698
ZCCHC24	ZCCHC24	-0.341186	-0.0366729	-2.97823	0.00476501	0.383409	-2.07861
PLIN2	PLIN2	0.341076	0.198861	1.57029	0.123731	0.623665	-4.53353
KHDRBS3	KHDRBS3	-0.341066	0.0288645	-1.6305	0.110354	0.599613	-4.45394
MDH2	MDH2	0.341066	0.188002	1.99884	0.0520194	0.496706	-3.91228
APRT	APRT	0.34081	0.0514463	2.70974	0.00965472	0.433346	-2.63076
ATRN	ATRN	0.340769	-0.314932	1.26037	0.214383	0.703379	-4.90082
LGALS9	LGALS9	-0.340334	-0.110151	-2.96358	0.00495652	0.383716	-2.10956
SEC24D	SEC24D	-0.340127	0.175654	-2.49834	0.0164099	0.444647	-3.04107
EVL	EVL	-0.339966	-0.210505	-1.84541	0.0719214	0.533608	-4.14904
MTAP	MTAP	0.339839	-0.381651	1.25058	0.217899	0.70614	-4.91123
IGLL1	IGLL1	-0.339358	-0.66572	-1.41651	0.163882	0.662134	-4.7248
ARHGEF6	ARHGEF6	-0.338523	-0.0888756	-2.55683	0.0142035	0.439224	-2.92984
MYO5A	MYO5A	-0.338028	-0.0929159	-2.39562	0.0210508	0.455388	-3.23199
PHF2	PHF2	0.337902	-0.24289	1.34255	0.186513	0.674694	-4.8105
TAPBP	TAPBP	-0.337728	0.0595927	-1.72919	0.0910021	0.565706	-4.3179
KYNU	KYNU	-0.337077	0.0643067	-1.59862	0.117282	0.608356	-4.49641
TPD52L1	TPD52L1	0.336962	0.0357829	1.49748	0.141627	0.647319	-4.62627
ALDH1B1	ALDH1B1	-0.336752	-0.107802	-1.3272	0.191497	0.680798	-4.82777
AUH	AUH	0.336661	-0.197571	2.5443	0.014652	0.439224	-2.95382
UBQLN2	UBQLN2	-0.336618	-0.119607	-3.85128	0.00038868	0.206054	-0.0919912
ORC3	ORC3	0.336421	0.090761	2.52249	0.0154635	0.439224	-2.99536
CTDSPL2	CTDSPL2	-0.336285	-0.00245305	-2.19484	0.0336639	0.466783	-3.588
COL14A1	COL14A1	-0.33619	-0.799385	-1.13581	0.262371	0.739166	-5.02768
NAGA	NAGA	0.335954	-0.363563	1.5019	0.140486	0.647319	-4.62075
EOGT	EOGT	-0.335903	0.0121683	-2.85746	0.00657475	0.405422	-2.33103
ISLR	ISLR	-0.335803	-0.0156878	-1.9477	0.0580479	0.507238	-3.99292
CARD16	CARD16	-0.335596	-0.0558827	-2.20088	0.0332036	0.466783	-3.57764
TBC1D1	TBC1D1	-0.335574	-0.478022	-2.06792	0.0447424	0.480751	-3.80072
GALM	GALM	0.33555	-0.342915	1.76114	0.0853778	0.55508	-4.27241
ERBB2	ERBB2	0.335388	0.027378	2.89918	0.00588737	0.388133	-2.24457
FKBP5	FKBP5	-0.335303	-0.111078	-2.53147	0.0151245	0.439224	-2.97829
C7	C7	-0.335152	-0.510529	-1.26437	0.212956	0.70079	-4.89654
HLA-DMA	HLA-DMA	-0.334331	-0.144404	-2.00665	0.0511477	0.496418	-3.89981
ADGRG1	ADGRG1	0.334191	-0.0340878	1.57462	0.122728	0.622396	-4.5279
CDH11	CDH11	-0.334118	0.104998	-1.95982	0.0565669	0.507238	-3.97395
WIPF1	WIPF1	-0.33387	-0.101229	-2.33327	0.0244157	0.464715	-3.34502
PARD6B	PARD6B	0.333784	0.0327854	2.90318	0.00582508	0.388133	-2.23623
LAMA3	LAMA3	0.333763	0.0723463	1.33385	0.189326	0.680006	-4.82031
CBR4	CBR4	0.333735	-0.0555098	1.95449	0.0572135	0.507238	-3.9823
METTL14	METTL14	0.333557	0.00168078	2.86385	0.00646483	0.402405	-2.31784
PIK3C3	PIK3C3	-0.333526	-0.114954	-2.4206	0.0198243	0.451368	-3.18609
ISG20	ISG20	-0.333521	-0.170824	-1.95165	0.0575616	0.507238	-3.98675
COL15A1	COL15A1	-0.333213	-0.416376	-1.61752	0.113132	0.60282	-4.47131
RPE	RPE	0.333211	-0.142734	2.49992	0.0163464	0.444647	-3.0381
BAIAP2L1	BAIAP2L1	0.333198	0.140388	2.02019	0.0496677	0.492977	-3.87812
SELENOT	SELENOT	-0.332966	0.0156248	-2.51935	0.0155838	0.439224	-3.00133
ALDH1L2	ALDH1L2	-0.332815	-0.119598	-1.86945	0.0684302	0.528352	-4.11297
TUBB4B	TUBB4B	0.332129	-0.0256561	1.96339	0.0561374	0.507238	-3.96836
TGOLN2	TGOLN2	-0.331826	0.0742415	-2.63336	0.0117259	0.434922	-2.78162
PIP5K1C	PIP5K1C	-0.331548	-0.673676	-2.12935	0.0390346	0.47643	-3.699
PSTPIP2	PSTPIP2	-0.331067	0.150796	-1.91539	0.0621574	0.519641	-4.04297
PSAT1	PSAT1	-0.330975	0.146	-1.3661	0.179063	0.671674	-4.78367
HIBADH	HIBADH	0.330813	0.0238049	1.56142	0.125808	0.627322	-4.54503
PYCRL	PYCRL	0.330313	0.0694171	2.3727	0.0222359	0.45588	-3.27379
MISP3	MISP3	0.329749	-0.0815317	1.90659	0.06332	0.520361	-4.05649
ARRDC1	ARRDC1	0.329478	0.0402432	2.09652	0.0419996	0.480146	-3.75364
CYC1	CYC1	0.329315	-0.00444878	2.77294	0.00820211	0.419394	-2.50378
TSPAN9	TSPAN9	-0.32924	-0.0166098	-2.4072	0.0204741	0.451368	-3.21076
EPS8L1	EPS8L1	0.32915	0.261886	1.58459	0.120442	0.618014	-4.51487
FCGR2B	FCGR2B	0.329144	-0.38142	1.71327	0.093918	0.57262	-4.34031
SURF1	SURF1	0.328843	0.0248976	1.79477	0.0797736	0.548117	-4.22375
IMPA1	IMPA1	0.328818	-0.481361	1.35389	0.182897	0.673044	-4.79763
ARHGEF18	ARHGEF18	-0.328636	0.0744854	-2.21	0.0325185	0.466783	-3.56195
GLO1	GLO1	0.3285	-0.585568	1.11448	0.271311	0.744018	-5.04818
PTMS	PTMS	0.32838	-0.473385	1.07094	0.290217	0.758357	-5.08888
ETFA	ETFA	0.328308	-0.0810512	2.5785	0.0134573	0.439224	-2.88818
GDE1	GDE1	-0.328221	-0.0442909	-2.48532	0.0169416	0.451368	-3.06559
LYPLA2	LYPLA2	0.32776	0.10141	3.00665	0.004413	0.368569	-2.01829
ACAN	ACAN	-0.327697	0.0149701	-1.65573	0.105111	0.59377	-4.41981
GPC4	GPC4	-0.327555	-0.264659	-2.44131	0.0188569	0.451368	-3.14778
VSNL1	VSNL1	-0.3274	0.120832	-1.12626	0.266346	0.740874	-5.0369
BCKDHA	BCKDHA	0.327293	0.0933293	2.19378	0.0337459	0.466783	-3.58983
TFF3	TFF3	0.326963	-1.04697	1.19676	0.238005	0.723369	-4.96713
PTRH1	PTRH1	0.326423	0.0226756	2.27999	0.027665	0.466783	-3.43986
EFEMP2	EFEMP2	-0.326002	0.0353854	-1.73788	0.0894431	0.564413	-4.3056
DARS2	DARS2	0.325765	0.151622	2.06342	0.0451882	0.483228	-3.80808
DDAH1	DDAH1	0.325545	-0.395195	1.30493	0.198907	0.685678	-4.85249
UBE2E2	UBE2E2	-0.325289	-0.110628	-1.5395	0.131063	0.639137	-4.57322
TPD52	TPD52	0.324971	-0.0461024	1.85629	0.0703229	0.529707	-4.13276
SCN7A	SCN7A	0.324947	-1.22536	1.26107	0.214131	0.702904	-4.90007
CAPN9	CAPN9	0.324834	-0.493728	1.56773	0.124329	0.62459	-4.53686
ANXA3	ANXA3	0.324495	0.260824	2.00423	0.0514163	0.496418	-3.90368
ARFGEF1	ARFGEF1	0.324232	0.00808537	2.1971	0.0334912	0.466783	-3.58413
ITGB4	ITGB4	0.323627	0.0524683	2.18648	0.0343112	0.467624	-3.60232
BTK	BTK	-0.323611	-0.161032	-1.87276	0.0679612	0.527539	-4.10798
ARHGAP25	ARHGAP25	-0.323582	-0.130671	-2.12058	0.0398084	0.476854	-3.71367
DCTD	DCTD	-0.323342	0.144954	-2.02494	0.0491576	0.492052	-3.87049
HLA-E	HLA-E	-0.323329	-0.0842165	-1.32061	0.193669	0.682236	-4.83513
PSMB10	PSMB10	-0.32322	0.0754585	-1.94471	0.0584175	0.507238	-3.99757
ANXA5	ANXA5	-0.323085	-0.169402	-2.08961	0.0426483	0.480751	-3.76506
STAT2	STAT2	-0.323058	0.0380537	-2.54278	0.0147073	0.439224	-2.95673
SPG20	SPG20	-0.322941	-0.368149	-2.21691	0.0320077	0.466783	-3.55002
ITGB5	ITGB5	-0.322723	0.190093	-2.72424	0.00930198	0.42195	-2.60181
GUSB	GUSB	0.32269	-0.0406249	1.47508	0.147529	0.652454	-4.65401
ACE	ACE	0.322643	-0.144938	2.03111	0.0485014	0.489647	-3.86054
TMBIM1	TMBIM1	0.321772	-0.0461467	1.63845	0.108679	0.596062	-4.44323
CCDC80	CCDC80	-0.321671	-0.0461929	-1.31168	0.196639	0.684968	-4.84504
NEFL	NEFL	-0.32159	-0.532195	-2.0014	0.0517327	0.496418	-3.9082
TFDP1	TFDP1	-0.3215	0.0388037	-1.54316	0.130175	0.636216	-4.56854
SLC30A7	SLC30A7	-0.321428	0.0961361	-3.02423	0.00420767	0.360548	-1.98081
TMEM68	TMEM68	0.321373	0.0378478	2.26191	0.0288523	0.466783	-3.47167
IGFBP2	IGFBP2	0.320991	-0.499307	0.930595	0.357297	0.80049	-5.20962
GREM1	GREM1	-0.320683	0.1281	-1.23518	0.223519	0.711482	-4.92746
CYR61	CYR61	-0.320481	0.11396	-1.23031	0.225319	0.713728	-4.93256
FOXP1	FOXP1	-0.320373	-0.101103	-2.31079	0.0257426	0.464715	-3.38524
NUCKS1	NUCKS1	0.320324	-0.325698	1.01782	0.314499	0.77523	-5.13647
CPM	CPM	-0.320271	-0.290588	-2.42587	0.0195737	0.451368	-3.17635
CYBB	CYBB	-0.32026	0.109437	-1.50818	0.138875	0.645747	-4.61289
DHCR7	DHCR7	-0.320208	0.182085	-1.64841	0.10661	0.594266	-4.42976
FDX1L	FDX1L	0.320153	-0.0998756	2.74315	0.00885966	0.42195	-2.56388
GPX3	GPX3	-0.319866	-0.296193	-1.42641	0.161023	0.661221	-4.71302
SPR	SPR	0.319381	0.0110049	2.21337	0.0322687	0.466783	-3.55614
SYNE1	SYNE1	-0.319302	-0.2869	-2.23974	0.0303707	0.466783	-3.51042
DPAGT1	DPAGT1	-0.319281	0.0688951	-2.38899	0.0213874	0.45588	-3.2441
CFDP1	CFDP1	0.318836	-0.242267	1.42578	0.161204	0.661221	-4.71377
MUC4	MUC4	-0.318795	-0.544795	-0.88854	0.37923	0.814388	-5.24266
ALDH6A1	ALDH6A1	0.318706	-0.244168	1.8939	0.0650278	0.523875	-4.07589
LPXN	LPXN	-0.318641	-0.224527	-2.01035	0.0507396	0.495188	-3.8939
KIAA0319L	KIAA0319L	-0.318354	0.0995618	-2.72278	0.00933688	0.42195	-2.60472
TRAPPC12	TRAPPC12	-0.317985	-0.24959	-1.53149	0.133027	0.640608	-4.58343
BRI3BP	BRI3BP	-0.317942	-0.0207171	-2.11228	0.0405524	0.477115	-3.72749
C14orf2	C14orf2	0.317648	-0.0813537	1.36132	0.180556	0.672054	-4.78915
FMNL1	FMNL1	-0.317589	-0.0172366	-1.87041	0.0682936	0.528352	-4.11152
ICAM3	ICAM3	-0.31751	-0.0329537	-1.64418	0.107486	0.594266	-4.43549
HIST3H2BB	HIST3H2BB	0.317448	0.0767805	1.01613	0.315291	0.77523	-5.13794
PECAM1	PECAM1	-0.317331	-0.0541049	-3.22568	0.00241364	0.331775	-1.54239
AEBP1	AEBP1	-0.317307	0.11541	-1.16721	0.249606	0.730449	-4.99686
SPCS1	SPCS1	-0.317284	-0.0891195	-2.35012	0.0234618	0.45588	-3.31469
PALM	PALM	-0.317037	-0.634334	-1.42063	0.162687	0.662134	-4.7199
MGME1	MGME1	0.316334	-0.0382456	1.81436	0.0766551	0.540768	-4.19506
TCIRG1	TCIRG1	-0.31627	0.038278	-1.78743	0.0809693	0.548252	-4.23443
ETFB	ETFB	0.316148	-0.145983	2.23013	0.0310505	0.466783	-3.52713
PLAU	PLAU	-0.31614	0.0959453	-1.31862	0.194329	0.682737	-4.83734
CAV2	CAV2	-0.316082	-0.696424	-1.38755	0.172475	0.668617	-4.75885
FNDC3B	FNDC3B	-0.3158	0.166878	-2.64869	0.0112801	0.434922	-2.75158
ADAMTS16	ADAMTS16	-0.31564	-0.0202336	-1.02401	0.311599	0.774754	-5.13104
SDHB	SDHB	0.315482	-0.0986073	2.41229	0.020225	0.451368	-3.2014
MMP12	MMP12	-0.315434	-0.0736728	-1.2945	0.202451	0.689254	-4.86394
CRBN	CRBN	-0.314902	-0.189478	-2.05181	0.0463548	0.485283	-3.827
HIGD1A	HIGD1A	0.314506	-0.24179	1.43082	0.159763	0.66032	-4.70775
C1orf35	C1orf35	0.314309	0.246685	2.4065	0.0205082	0.451368	-3.21203
BCAT1	BCAT1	-0.314247	-0.127605	-1.77179	0.083568	0.553451	-4.25708
SLC25A24	SLC25A24	0.314182	0.115551	2.07959	0.0436045	0.480751	-3.78156
CHMP4C	CHMP4C	0.314125	-0.1994	2.19461	0.0336819	0.466783	-3.5884
PDLIM5	PDLIM5	-0.314113	0.073939	-2.41835	0.0199319	0.451368	-3.19023
MZB1	MZB1	-0.314085	-0.564305	-0.991566	0.326997	0.786301	-5.15914
CPPED1	CPPED1	0.313572	-0.488961	1.15199	0.255738	0.735648	-5.0119
PHLDB2	PHLDB2	-0.313208	-0.201095	-1.95669	0.0569465	0.507238	-3.97886
FAM118B	FAM118B	-0.313149	0.038231	-2.52864	0.0152306	0.439224	-2.98367
NRAS	NRAS	0.313122	-0.0496567	1.74199	0.0887126	0.563194	-4.29976
CALML4	CALML4	0.312993	-0.202854	1.5454	0.129632	0.635818	-4.56567
FAM26E	FAM26E	-0.312979	0.0681823	-2.16232	0.0362429	0.46963	-3.64344
F12	F12	-0.312847	-0.239305	-1.6605	0.104143	0.590342	-4.41331
EPS8L3	EPS8L3	0.312825	0.0645439	1.62379	0.111784	0.599613	-4.46294
TTC39B	TTC39B	-0.312411	-0.0343	-1.85692	0.0702314	0.529707	-4.13182
DEFA1B	DEFA1B	-0.31201	-0.407271	-0.730785	0.468903	0.855166	-5.35346
MCM3AP	MCM3AP	-0.311943	0.125823	-1.8044	0.0782274	0.54395	-4.20968
SERPINF1	SERPINF1	-0.31167	-0.0416341	-1.35773	0.181685	0.672054	-4.79326
MXRA8	MXRA8	-0.311496	-0.107582	-2.43441	0.0191742	0.451368	-3.16056
LIMD2	LIMD2	-0.311429	-0.0410009	-1.36261	0.180152	0.672054	-4.78767
PODN	PODN	-0.311313	-0.350802	-2.54929	0.0144718	0.439224	-2.94428
GK	GK	-0.310967	0.0937951	-2.43166	0.019302	0.451368	-3.16565
PALM2-AKAP2	PALM2-AKAP2	-0.310866	-0.123817	-2.75837	0.00851777	0.419394	-2.53322
PTMA	PTMA	0.310557	-0.11272	1.1895	0.240818	0.725441	-4.9745
HIST1H1D	HIST1H1D	-0.31009	0.0630439	-1.12974	0.264896	0.740548	-5.03355
GAA	GAA	0.309441	-0.323293	1.34764	0.184884	0.673586	-4.80474
CLASRP	CLASRP	-0.308666	0.00791276	-1.78386	0.0815574	0.549796	-4.23963
B4GALT1	B4GALT1	-0.308643	0.183959	-2.24809	0.0297911	0.466783	-3.49587
ARF5	ARF5	0.308487	-0.0601927	2.30334	0.0261962	0.465739	-3.3985
NEBL	NEBL	0.308484	0.212232	1.39564	0.170042	0.664598	-4.74941
ENGASE	ENGASE	0.308308	-0.0248195	1.64997	0.106289	0.594266	-4.42764
DOCK2	DOCK2	-0.308307	-0.172693	-2.18329	0.0345607	0.467624	-3.60776
BCL2L13	BCL2L13	0.30783	-0.0549244	2.89202	0.00600024	0.388133	-2.25945
PRKG1	PRKG1	-0.307784	-0.434078	-1.74713	0.0878064	0.560839	-4.29244
SLC30A9	SLC30A9	0.307753	0.0945705	2.35407	0.0232431	0.45588	-3.30756
COLGALT1	COLGALT1	-0.307506	0.199005	-2.46726	0.0177053	0.451368	-3.09945
LIMS1	LIMS1	-0.307425	-0.243159	-2.44963	0.0184805	0.451368	-3.13232
C3	C3	-0.307362	-0.512685	-1.38771	0.172427	0.668617	-4.75866
PDXK	PDXK	0.307256	-0.117254	1.49886	0.141271	0.647319	-4.62455
PSMB9	PSMB9	-0.306474	0.106544	-1.78373	0.0815778	0.549796	-4.23981
DYNLL2	DYNLL2	0.306264	-0.329924	2.0255	0.049098	0.492052	-3.86959
GIMAP8	GIMAP8	-0.306009	-0.17212	-2.00118	0.0517566	0.496418	-3.90855
KIAA1462	KIAA1462	-0.305973	-0.212303	-1.46596	0.149987	0.654193	-4.6652
SLC25A13	SLC25A13	0.305801	0.142771	1.87369	0.0678303	0.527539	-4.10658
MTMR6	MTMR6	-0.30572	-0.082178	-2.29718	0.0265771	0.465828	-3.40945
FGA	FGA	-0.305559	-0.588293	-0.672901	0.504637	0.873429	-5.38886
GTPBP6	GTPBP6	0.30554	0.0221393	2.23171	0.0309378	0.466783	-3.52439
NIT1	NIT1	0.30549	-0.352298	1.75481	0.086468	0.557192	-4.28148
TBRG4	TBRG4	0.304808	0.205612	1.82613	0.0748309	0.538191	-4.17769
CLGN	CLGN	-0.304672	0.178408	-1.35035	0.184021	0.673044	-4.80167
PAFAH1B3	PAFAH1B3	0.304475	-0.184339	1.33073	0.190342	0.680321	-4.82381
HEXA	HEXA	0.304178	-0.263729	1.4414	0.156769	0.658647	-4.69504
ACADSB	ACADSB	0.304101	-0.0697805	2.08861	0.0427432	0.480751	-3.76672
CCDC124	CCDC124	-0.304098	0.0034561	-2.66332	0.0108692	0.434922	-2.7228
NOL4L	NOL4L	0.303794	-0.174184	2.316	0.0254291	0.464715	-3.37593
NEK3	NEK3	-0.303423	-0.0236268	-1.52715	0.134101	0.641307	-4.58895
HIST3H3	HIST3H3	0.303405	-0.320474	1.188	0.241402	0.725441	-4.97602
CTSE	CTSE	0.303174	-0.0853802	0.692846	0.492159	0.867372	-5.37698
PDLIM4	PDLIM4	-0.302788	-0.4329	-1.56773	0.124329	0.62459	-4.53686
KCNAB2	KCNAB2	-0.302741	0.00334146	-2.50004	0.0163415	0.444647	-3.03786
HABP2	HABP2	-0.302463	-0.250376	-1.02649	0.31044	0.774754	-5.12885
EML2	EML2	0.30219	-0.062078	2.42197	0.0197587	0.451368	-3.18355
EEPD1	EEPD1	0.302042	0.119671	1.49516	0.142229	0.647394	-4.62916
RFTN1	RFTN1	-0.30194	0.0405049	-2.28526	0.0273272	0.466783	-3.43055
IMPA2	IMPA2	0.301783	-0.265427	1.06273	0.293882	0.761678	-5.09638
GIMAP1	GIMAP1	-0.301666	-0.102473	-1.98164	0.0539833	0.507238	-3.93959
OGFOD2	OGFOD2	-0.301516	-0.306115	-0.96319	0.340877	0.792674	-5.18301
AKR1C3	AKR1C3	0.301432	-0.404041	1.11598	0.270675	0.743324	-5.04675
UQCRH	UQCRH	0.301374	0.0719366	2.36629	0.0225779	0.45588	-3.28543
GALNT6	GALNT6	0.300898	0.31582	1.40049	0.168594	0.662134	-4.74372
RNASE1	RNASE1	0.300241	-0.808512	1.70812	0.0948779	0.573423	-4.34752
NOP10	NOP10	0.300129	-0.0117805	2.12838	0.0391191	0.47643	-3.70061
HSD17B8	HSD17B8	0.30004	-0.1513	2.11028	0.0407333	0.477115	-3.73081
CDKN2C	CDKN2C	-0.299976	-0.466996	-2.0737	0.0441762	0.480751	-3.79125
PGM2	PGM2	0.299899	-0.198512	1.42027	0.162792	0.662134	-4.72033
PPP1CC	PPP1CC	0.299862	-0.098261	2.39731	0.0209656	0.455036	-3.22889
HSPA13	HSPA13	-0.299635	0.0579951	-2.59211	0.0130072	0.439224	-2.86188
SSC5D	SSC5D	-0.299504	-0.420907	-2.07264	0.0442789	0.480751	-3.79298
KIAA1211	KIAA1211	-0.299492	-0.209495	-1.79396	0.0799048	0.548117	-4.22493
CALM2	CALM2	0.299442	-0.419844	1.26483	0.212794	0.700606	-4.89605
TIMM9	TIMM9	0.299141	0.142768	2.06722	0.0448109	0.480751	-3.80185
GTPBP3	GTPBP3	0.29878	-0.0540117	1.92953	0.0603287	0.512008	-4.02114
TMEM199	TMEM199	-0.298581	0.0602018	-1.66736	0.102763	0.588059	-4.40393
CDH2	CDH2	0.298424	-0.451912	1.47236	0.148258	0.652796	-4.65735
ITGA1	ITGA1	-0.298274	-0.466534	-2.24313	0.0301338	0.466783	-3.50451
HDGFRP3	HDGFRP3	-0.298251	-0.495707	-1.20201	0.235987	0.721209	-4.96178
CELF2	CELF2	-0.298084	-0.0633488	-2.29831	0.0265064	0.465828	-3.40743
AKAP5	AKAP5	0.298018	-0.292344	1.86372	0.0692495	0.528416	-4.12161
SH3BGRL2	SH3BGRL2	0.297801	-0.158185	1.67846	0.100565	0.58487	-4.38869
ITGB2	ITGB2	-0.297577	0.1164	-1.36723	0.178711	0.671674	-4.78237
NUDCD1	NUDCD1	0.297381	0.211676	2.41571	0.0200594	0.451368	-3.19511
SH3KBP1	SH3KBP1	-0.296973	-0.0787829	-1.70942	0.0946353	0.573423	-4.3457
CDH13	CDH13	-0.296842	-0.167429	-2.21248	0.0323339	0.466783	-3.55766
SHBG	SHBG	-0.296789	-0.255383	-1.78684	0.0810659	0.548252	-4.23529
TTLL12	TTLL12	0.29662	0.0791805	2.45653	0.0181732	0.451368	-3.11946
CCDC28A	CCDC28A	0.296485	-0.185315	2.94242	0.00524598	0.383716	-2.15412
HCLS1	HCLS1	-0.296382	-0.0902	-1.71288	0.0939902	0.57262	-4.34085
TMEM119	TMEM119	-0.296212	-0.0713493	-2.12044	0.0398208	0.476854	-3.7139
CGN	CGN	0.295985	0.00483171	2.09394	0.042241	0.480146	-3.75791
CLMN	CLMN	0.295943	-0.193224	1.84571	0.0718769	0.533608	-4.14859
ITLN1	ITLN1	0.295869	-1.588	0.829157	0.411628	0.831575	-5.28681
FANCI	FANCI	-0.295724	0.0865218	-1.2555	0.216126	0.705577	-4.90601
IPO8	IPO8	-0.295513	0.0370624	-2.43339	0.0192217	0.451368	-3.16245
PACS2	PACS2	0.29536	-0.171964	2.43502	0.0191461	0.451368	-3.15944
PADI4	PADI4	-0.295244	-0.0675659	-0.809144	0.42292	0.837575	-5.30103
COA6	COA6	0.29488	-0.0598171	1.6792	0.10042	0.58487	-4.38766
AMACR	AMACR	0.294838	-0.0511951	0.76187	0.450327	0.85097	-5.33328
STX11	STX11	-0.294806	-0.167072	-1.89937	0.0642864	0.522366	-4.06753
NCAPD3	NCAPD3	-0.294723	-0.059421	-2.02042	0.0496432	0.492977	-3.87776
HMGA1	HMGA1	0.294573	0.241334	1.74069	0.0889434	0.563194	-4.30161
SERPINB9	SERPINB9	-0.294559	0.0509	-2.01625	0.0500948	0.495188	-3.88445
MGAT5	MGAT5	-0.294159	0.301032	-1.76106	0.0853905	0.55508	-4.27252
ARG1	ARG1	-0.293797	-0.0154732	-0.892514	0.377121	0.814388	-5.2396
CRAT	CRAT	0.293676	-0.063322	1.15835	0.25316	0.734118	-5.00563
ABCC3	ABCC3	0.293246	-0.25432	2.04328	0.0472289	0.48946	-3.84085
ATL3	ATL3	-0.293216	-0.200593	-2.82069	0.00724186	0.406581	-2.40659
RPP25	RPP25	0.293148	0.0788683	1.3915	0.171284	0.667218	-4.75425
PLS3	PLS3	-0.293057	0.273305	-1.5764	0.122317	0.622317	-4.52558
ADPRH	ADPRH	-0.293013	-0.0919293	-1.8779	0.0672377	0.527539	-4.1002
TTC19	TTC19	-0.292963	0.0316537	-2.10643	0.041085	0.477115	-3.73723
SULF1	SULF1	-0.292961	0.277941	-1.27912	0.207766	0.696595	-4.88068
PLGRKT	PLGRKT	0.292959	0.109205	1.45193	0.153833	0.65692	-4.68231
ALCAM	ALCAM	0.292515	-0.110527	1.30118	0.200177	0.686828	-4.85662
RRS1	RRS1	0.292507	0.373868	2.38113	0.0217931	0.45588	-3.25845
ABRACL	ABRACL	0.292398	0.187454	1.66505	0.103228	0.589089	-4.4071
TXN2	TXN2	0.292371	-0.232537	1.43131	0.159622	0.66032	-4.70715
MSMO1	MSMO1	-0.292295	0.32043	-1.91118	0.0627114	0.519641	-4.04944
TOMM6	TOMM6	0.29179	0.0246171	2.0712	0.04442	0.480751	-3.79534
NRP1	NRP1	-0.291787	-0.0972415	-2.03388	0.0482085	0.489647	-3.85606
GBP4	GBP4	-0.291526	-0.0152834	-2.07289	0.0442551	0.480751	-3.79258
SH2D4A	SH2D4A	0.291478	-0.0120732	1.78968	0.0806018	0.548117	-4.23117
PPIB	PPIB	-0.291418	0.102471	-2.38948	0.0213624	0.45588	-3.24321
DBT	DBT	0.291206	-0.0700049	1.92615	0.0607619	0.512669	-4.02637
PTPRC	PTPRC	-0.291076	-0.0827634	-1.61117	0.114512	0.60282	-4.47977
MACROD1	MACROD1	0.29056	0.183444	1.51471	0.137217	0.644383	-4.60468
HPRT1	HPRT1	0.290344	-0.18261	1.11141	0.272611	0.744807	-5.05109
STOM	STOM	-0.29015	-0.269263	-1.80926	0.0774568	0.542377	-4.20256
PIN4	PIN4	0.290109	0.210351	1.47579	0.147338	0.652454	-4.65314
MPZ	MPZ	-0.289742	-1.02675	-1.14092	0.260263	0.737003	-5.02272
AAK1	AAK1	-0.289584	-0.029461	-3.53807	0.000986777	0.331775	-0.833202
RASSF2	RASSF2	-0.289557	-0.0378346	-1.81022	0.0773052	0.542377	-4.20115
CD93	CD93	-0.289463	0.00924065	-1.86564	0.0689737	0.528352	-4.11871
SAA2-SAA4	SAA2-SAA4	-0.289108	-0.705566	-1.16932	0.248763	0.730291	-4.99476
HSPE1	HSPE1	0.289006	0.118812	1.52039	0.135786	0.644108	-4.5975
NIT2	NIT2	0.288991	-0.11901	1.72403	0.0919395	0.566402	-4.32519
ADAMTSL4	ADAMTSL4	-0.288901	-0.449483	-1.81693	0.0762534	0.540768	-4.19128
MBNL2	MBNL2	0.288805	0.30155	1.8699	0.0683669	0.528352	-4.1123
KRT1	KRT1	0.288701	-0.458583	1.12966	0.264927	0.740548	-5.03363
PRDX4	PRDX4	-0.288617	0.0211951	-2.51571	0.015724	0.439224	-3.00822
IL4I1	IL4I1	-0.288508	0.0405439	-1.26535	0.212608	0.700606	-4.89549
ABCA8	ABCA8	0.288365	-1.04973	1.27881	0.207873	0.696595	-4.88101
SPRYD4	SPRYD4	0.288362	-0.113085	1.74363	0.0884221	0.563194	-4.29742
SLC1A4	SLC1A4	-0.28798	0.139654	-1.53395	0.132421	0.640081	-4.5803
TIMP1	TIMP1	0.287629	0.198776	1.45524	0.152918	0.656872	-4.67828
EPN3	EPN3	0.287562	-0.286681	2.25241	0.0294945	0.466783	-3.48831
GGT5	GGT5	-0.287475	-0.0472293	-1.87617	0.0674797	0.527539	-4.10281
COMMD9	COMMD9	-0.287263	-0.163417	-2.42688	0.0195262	0.451368	-3.17449
FGF2	FGF2	-0.287136	-0.79225	-1.25722	0.215509	0.705322	-4.90418
HAT1	HAT1	-0.287049	0.150705	-2.07981	0.0435833	0.480751	-3.7812
PLOD1	PLOD1	-0.286301	0.16601	-2.02695	0.0489426	0.492052	-3.86724
TMEM109	TMEM109	-0.2862	-0.0167463	-2.18342	0.034551	0.467624	-3.60755
PPIC	PPIC	-0.286167	0.179661	-1.73338	0.0902478	0.565706	-4.31198
SFRP2	SFRP2	-0.286082	-0.250983	-0.749573	0.457623	0.852318	-5.34136
FGGY	FGGY	0.285956	-0.162167	2.12552	0.0393704	0.476854	-3.7054
FABP3	FABP3	0.285826	-0.615195	0.946533	0.349204	0.796974	-5.19672
LSM7	LSM7	0.285767	0.111073	1.91544	0.0621508	0.519641	-4.04289
HDHD5	HDHD5	0.285736	0.0885976	2.51638	0.0156982	0.439224	-3.00696
SFN	SFN	0.285648	0.129844	2.32634	0.0248181	0.464715	-3.35745
VWF	VWF	-0.285459	-0.25598	-2.22175	0.031654	0.466783	-3.54164
TXNDC5	TXNDC5	-0.285348	-0.149178	-1.76819	0.0841766	0.553736	-4.26228
ENAH	ENAH	-0.285289	-0.125002	-2.46263	0.0179058	0.451368	-3.10809
FBP2	FBP2	-0.284795	0.0739749	-1.0827	0.285022	0.75312	-5.07804
PDP1	PDP1	0.284598	0.0776195	1.78256	0.0817715	0.549978	-4.24151
MORC2	MORC2	0.284534	0.19048	2.80529	0.00753955	0.409834	-2.43806
HLA-DQA1	HLA-DQA1	-0.284495	-0.0859276	-1.02264	0.312241	0.774754	-5.13224
APBB1IP	APBB1IP	-0.284388	-0.0977829	-1.75826	0.085872	0.556019	-4.27653
SPARC	SPARC	-0.284132	0.143317	-1.37137	0.177428	0.671674	-4.77761
ACOT11	ACOT11	0.284101	-0.125171	2.17405	0.0352937	0.467912	-3.62352
TXNRD2	TXNRD2	0.283931	-0.0440049	2.3102	0.0257783	0.464715	-3.38629
HVCN1	HVCN1	-0.283895	-0.21709	-1.58929	0.119374	0.615337	-4.50869
RAP1GAP2	RAP1GAP2	0.283702	-0.0924786	2.19782	0.0334363	0.466783	-3.5829
PLPP3	PLPP3	-0.283687	-0.395141	-1.9379	0.0592682	0.50852	-4.00816
STARD10	STARD10	0.283411	-0.181866	1.43011	0.159965	0.66032	-4.70859
FN1	FN1	-0.283249	-0.0605829	-0.972803	0.336132	0.791249	-5.175
MRVI1	MRVI1	-0.283141	-0.436412	-1.82471	0.0750479	0.53881	-4.17978
MTX2	MTX2	0.28312	0.0291171	2.23882	0.0304353	0.466783	-3.51203
RBM38	RBM38	0.282926	-0.0963254	1.07054	0.290392	0.758371	-5.08924
HSD17B4	HSD17B4	-0.282733	0.0673366	-1.65449	0.105363	0.594266	-4.4215
SPECC1	SPECC1	-0.282712	0.0261788	-2.70027	0.00989172	0.434922	-2.64961
MARCKSL1	MARCKSL1	0.28207	0.0796146	1.40413	0.167514	0.662134	-4.73943
ARHGAP15	ARHGAP15	-0.281926	-0.079233	-1.91126	0.0627015	0.519641	-4.04933
OAF	OAF	-0.28173	-0.23212	-1.76894	0.0840494	0.553451	-4.26119
S100A14	S100A14	0.281667	-0.147327	0.958576	0.343171	0.792674	-5.18683
TIMM8B	TIMM8B	-0.281358	0.00210732	-1.59976	0.117029	0.608356	-4.4949
PKP3	PKP3	0.281345	0.22908	2.07238	0.0443044	0.480751	-3.79341
IFI30	IFI30	0.281212	-0.128927	0.999734	0.323073	0.784726	-5.15214
PAAF1	PAAF1	-0.281083	0.0609043	-2.29315	0.0268285	0.465828	-3.41659
RAP1GAP	RAP1GAP	-0.281068	-0.0413509	-1.27744	0.208351	0.697109	-4.88249
CES2	CES2	0.280953	-0.576559	1.07415	0.28879	0.757028	-5.08593
MMP11	MMP11	-0.280826	0.167685	-1.4173	0.163654	0.662134	-4.72387
EPPK1	EPPK1	0.280654	-0.0457024	1.83148	0.0740138	0.535761	-4.16977
ALDOB	ALDOB	0.280444	-0.792439	0.784987	0.436796	0.847332	-5.31775
SH3D19	SH3D19	-0.280328	-0.183307	-2.03661	0.0479223	0.48946	-3.85165
ICMT	ICMT	-0.279881	-0.00715667	-2.04136	0.0474279	0.48946	-3.84397
AKR7A3	AKR7A3	0.279684	-0.0677341	1.33053	0.190408	0.680321	-4.82404
ASPN	ASPN	-0.279273	-0.784476	-0.829522	0.411424	0.831575	-5.28655
SAMHD1	SAMHD1	-0.279076	-0.0892293	-1.93272	0.0599229	0.511337	-4.0162
HSPB7	HSPB7	-0.278648	-1.35241	-0.743345	0.461345	0.852972	-5.34541
OPLAH	OPLAH	0.278222	-0.0826268	2.82224	0.00721254	0.406581	-2.40342
BCL2L1	BCL2L1	0.278176	0.0643317	1.90365	0.0637117	0.520904	-4.06099
DYM	DYM	-0.278024	0.0281046	-2.03332	0.0482679	0.489647	-3.85697
MIF	MIF	0.277716	-0.109554	1.38658	0.17277	0.66906	-4.75999
GULP1	GULP1	-0.277699	-0.0614954	-1.67947	0.100366	0.58487	-4.38729
CDH1	CDH1	0.277552	-0.0221146	2.14367	0.0377995	0.472351	-3.67495
RAB11FIP1	RAB11FIP1	0.277543	0.0392146	1.48535	0.1448	0.650349	-4.64134
ECH1	ECH1	0.277436	-0.178902	1.21565	0.230798	0.717034	-4.94777
TSPAN8	TSPAN8	0.277371	-0.108329	1.19635	0.238164	0.723369	-4.96755
PADI2	PADI2	0.277175	-0.64111	1.3262	0.191827	0.680798	-4.82889
KIAA1191	KIAA1191	-0.277166	-0.0996332	-2.32798	0.0247224	0.464715	-3.35452
CTDSP1	CTDSP1	0.277046	-0.141069	2.60161	0.0127014	0.439224	-2.84349
PCSK1N	PCSK1N	0.277011	-1.2621	0.88716	0.379964	0.814388	-5.24372
FBLN5	FBLN5	-0.276937	0.10559	-1.0837	0.284582	0.75312	-5.07711
UAP1L1	UAP1L1	-0.276825	-0.145041	-1.23324	0.224234	0.712668	-4.92949
GON7	GON7	0.276738	-0.0118463	2.15035	0.0372355	0.470272	-3.66369
TNFAIP2	TNFAIP2	-0.276731	-0.143071	-2.37684	0.0220176	0.45588	-3.26627
PDLIM3	PDLIM3	-0.276602	-0.886227	-1.18702	0.241784	0.725441	-4.97701
SCG2	SCG2	0.276569	-1.17686	1.14754	0.257551	0.735648	-5.01626
ADI1	ADI1	0.276499	-0.0806927	1.38937	0.171926	0.66806	-4.75673
FAM83H	FAM83H	0.276402	0.0769829	2.53791	0.0148857	0.439224	-2.96602
POLG2	POLG2	0.276302	0.157401	2.51435	0.0157769	0.439224	-3.01081
PLXDC2	PLXDC2	-0.276029	0.0469187	-1.79149	0.0803062	0.548117	-4.22853
KLK1	KLK1	-0.275934	-0.477707	-1.29875	0.201001	0.687508	-4.85929
TBCEL	TBCEL	-0.275863	-0.261915	-2.41208	0.0202351	0.451368	-3.20178
ELOB	ELOB	0.27586	-0.046939	1.80633	0.0779198	0.543462	-4.20685
LIPA	LIPA	0.275758	-0.249637	1.40049	0.168593	0.662134	-4.74371
RING1	RING1	-0.275706	0.0348854	-1.94987	0.0577799	0.507238	-3.98952
CEACAM6	CEACAM6	0.275668	0.0681349	1.2724	0.210119	0.698772	-4.88793
EZR	EZR	0.275513	0.0254878	1.57654	0.122285	0.622317	-4.52539
TBC1D17	TBC1D17	0.275029	-0.0136122	2.45101	0.0184187	0.451368	-3.12976
THNSL1	THNSL1	0.274428	0.0316122	2.00045	0.0518387	0.496418	-3.90971
PEPD	PEPD	0.274395	-0.317773	1.15793	0.25333	0.734118	-5.00605
APOD	APOD	0.274183	-0.346663	1.10392	0.275812	0.746912	-5.05819
ASNS	ASNS	-0.27409	0.22999	-1.15154	0.255919	0.735648	-5.01234
BCKDK	BCKDK	0.273663	0.0904317	1.96279	0.0562095	0.507238	-3.9693
COQ5	COQ5	0.27365	-0.140402	2.00236	0.0516249	0.496418	-3.90667
S100A12	S100A12	-0.273547	-0.134278	-0.652209	0.517763	0.875724	-5.40082
P4HA2	P4HA2	-0.273352	0.165415	-1.63902	0.10856	0.595907	-4.44247
LAD1	LAD1	0.273304	0.290134	1.66276	0.103687	0.589763	-4.41022
TCEA3	TCEA3	0.273268	-0.268227	1.05418	0.297732	0.766104	-5.10414
RPS6KA1	RPS6KA1	0.273109	-0.0172805	2.4132	0.0201807	0.451368	-3.19972
CHEK2	CHEK2	0.273002	0.0534894	2.6711	0.0106563	0.434922	-2.70744
SARM1	SARM1	-0.272881	-0.202898	-1.8619	0.0695107	0.528416	-4.12434
RNPEP	RNPEP	0.272037	0.039078	2.13272	0.0387405	0.475996	-3.69334
IBA57	IBA57	0.271994	0.0352122	2.09149	0.0424709	0.480657	-3.76196
LYPLAL1	LYPLAL1	0.27197	0.123241	1.59298	0.118545	0.612016	-4.50385
GTF2I	GTF2I	0.271885	0.239741	2.28765	0.0271755	0.466783	-3.42633
GPC6	GPC6	-0.271843	-0.144263	-1.46234	0.150973	0.655453	-4.66964
TPD52L2	TPD52L2	0.271823	0.0265902	2.33037	0.0245832	0.464715	-3.35022
GLUD1	GLUD1	0.27179	0.0387268	2.09538	0.0421064	0.480146	-3.75554
GNAS	GNAS	0.271707	-0.151198	2.35811	0.0230208	0.45588	-3.30024
UGT2A3	UGT2A3	-0.271622	-1.23678	-1.00968	0.318338	0.778296	-5.14355
ARMC10	ARMC10	0.271614	0.183898	1.84179	0.0724607	0.533608	-4.15444
CPSF4	CPSF4	-0.271526	0.109778	-1.88751	0.0659023	0.527539	-4.08561
SLC35F6	SLC35F6	0.27146	0.201751	1.84055	0.0726464	0.533608	-4.15629
ATP11B	ATP11B	-0.271207	-0.565771	-1.30011	0.200539	0.686852	-4.8578
DGUOK	DGUOK	0.270774	-0.0854302	1.64279	0.107773	0.594266	-4.43737
CORO1A	CORO1A	-0.270666	-0.0226707	-1.77978	0.0822314	0.550825	-4.24553
CALD1	CALD1	-0.270443	-0.893678	-1.12911	0.265156	0.740548	-5.03416
CCNT1	CCNT1	-0.270298	0.0648363	-2.15589	0.0367732	0.470272	-3.65433
CMPK1	CMPK1	0.270174	0.0202439	1.64714	0.106872	0.594266	-4.43148
CD59	CD59	-0.270035	-0.345163	-2.11741	0.0400909	0.476854	-3.71895
GNL3L	GNL3L	-0.270022	0.160449	-2.63517	0.0116725	0.434922	-2.77809
SLC7A1	SLC7A1	-0.269851	0.174759	-1.53433	0.132328	0.640081	-4.57982
ABAT	ABAT	0.269842	-0.239298	0.758949	0.452054	0.85097	-5.33521
HCCS	HCCS	-0.269283	0.103083	-2.30799	0.0259121	0.464925	-3.39022
CD300A	CD300A	-0.269152	-0.134218	-2.12984	0.0389917	0.47643	-3.69818
SDHA	SDHA	0.269128	-0.0975293	2.32136	0.0251107	0.464715	-3.36636
MRPS33	MRPS33	0.269094	0.0769195	1.69684	0.0970092	0.577572	-4.36325
COQ8A	COQ8A	0.268863	0.0543	1.81452	0.0766291	0.540768	-4.19482
PYY	PYY	-0.268625	-2.44934	-0.780183	0.439588	0.847653	-5.32101
ASAH1	ASAH1	0.268569	-0.0717927	1.38012	0.174735	0.671057	-4.76749
NCAPH	NCAPH	-0.26856	0.0717885	-1.40162	0.168257	0.662134	-4.74238
DNPEP	DNPEP	0.268437	-0.0821341	1.77911	0.0823437	0.550891	-4.24651
NID2	NID2	-0.268417	-0.187293	-1.73761	0.0894899	0.564413	-4.30597
CENPV	CENPV	0.268377	0.0491683	1.91211	0.0625883	0.519641	-4.04801
OMA1	OMA1	0.26778	-0.0112549	1.57328	0.123038	0.622396	-4.52964
TMX2	TMX2	-0.267686	0.0978146	-1.86187	0.0695158	0.528416	-4.12439
QPRT	QPRT	0.267455	-0.0788122	0.794986	0.43102	0.844836	-5.31089
ICAM1	ICAM1	-0.267436	0.102741	-1.34087	0.187056	0.67516	-4.8124
HSPA1A	HSPA1A	0.267103	-0.362849	1.86242	0.0694366	0.528416	-4.12357
PLEKHO2	PLEKHO2	-0.267085	-0.103266	-1.82085	0.0756441	0.54039	-4.18549
ELMO3	ELMO3	0.267058	-0.0295463	2.11702	0.040126	0.476854	-3.7196
PITHD1	PITHD1	0.266971	-0.274534	1.49348	0.142667	0.647483	-4.63125
KRT5	KRT5	0.266874	-0.121136	1.49007	0.143557	0.649028	-4.63548
GALK2	GALK2	0.266739	0.0833805	2.21922	0.0318383	0.466783	-3.54602
CD38	CD38	-0.266474	-0.189576	-1.16359	0.251054	0.73165	-5.00045
RELL1	RELL1	-0.266458	-0.209292	-1.8967	0.0646477	0.52339	-4.07162
JTB	JTB	0.266226	-0.159189	1.19405	0.23905	0.723369	-4.96988
CDC16	CDC16	0.26571	0.0592829	2.20122	0.0331778	0.466783	-3.57706
DNAJC1	DNAJC1	-0.265694	0.0149268	-1.76444	0.0848129	0.55508	-4.26766
JUP	JUP	0.265658	0.0900463	2.23038	0.0310327	0.466783	-3.52669
PLA2G1B	PLA2G1B	-0.265329	-0.867598	-0.725984	0.471811	0.856634	-5.35651
LLGL2	LLGL2	0.26514	-0.0249829	2.37662	0.0220288	0.45588	-3.26666
VTN	VTN	-0.265103	-0.361868	-0.771127	0.444879	0.850569	-5.32711
SRA1	SRA1	-0.264963	0.0370905	-2.11824	0.0400169	0.476854	-3.71757
MTPN	MTPN	0.264812	-0.0991268	1.37888	0.175114	0.671057	-4.76892
HIST1H2AB	HIST1H2AB	-0.264775	-0.0895683	-0.587018	0.560284	0.892971	-5.43612
ENTPD2	ENTPD2	0.264522	-0.0228761	1.83519	0.0734523	0.534213	-4.16427
DDR1	DDR1	0.264425	0.00447628	2.13576	0.0384772	0.475996	-3.68824
COL10A1	COL10A1	-0.264407	-0.311556	-0.878311	0.384692	0.816818	-5.25047
DDX58	DDX58	-0.26389	-0.0113707	-1.76976	0.0839095	0.553451	-4.26
NDRG1	NDRG1	0.263889	-0.131873	1.99968	0.0519246	0.49652	-3.91094
FAH	FAH	0.263811	-0.306112	1.6159	0.113483	0.60282	-4.47347
COQ9	COQ9	0.263707	-0.164376	1.60097	0.11676	0.608317	-4.4933
PAPSS2	PAPSS2	-0.263594	-0.381712	-1.36446	0.179575	0.671674	-4.78555
FEN1	FEN1	-0.26352	0.251785	-1.83624	0.0732935	0.534213	-4.1627
SNX18	SNX18	-0.263354	-0.0935	-1.87901	0.067082	0.527539	-4.09852
NUP210	NUP210	-0.263171	0.154946	-1.63538	0.109323	0.598104	-4.44737
CASP4	CASP4	-0.263072	-0.0745148	-1.60808	0.115191	0.603678	-4.48388
FAM98C	FAM98C	0.262909	-0.0533976	3.11947	0.00324243	0.351755	-1.77552
VNN2	VNN2	-0.262813	-0.0953998	-0.727833	0.470689	0.855463	-5.35534
FILIP1L	FILIP1L	-0.26262	0.067661	-1.75965	0.0856334	0.555565	-4.27455
TRMT5	TRMT5	0.262594	0.215349	2.11105	0.0406643	0.477115	-3.72955
JPH2	JPH2	-0.262472	-0.855949	-1.24229	0.220911	0.708248	-4.91999
TRIM21	TRIM21	-0.262381	-0.0567707	-2.67038	0.0106759	0.434922	-2.70887
TYMP	TYMP	-0.262168	0.103863	-1.20855	0.23349	0.718903	-4.95509
VWA8	VWA8	0.262126	-0.0599415	2.02002	0.0496862	0.492977	-3.8784
AP1S2	AP1S2	-0.262081	-0.0581546	-2.5968	0.0128554	0.439224	-2.85281
FAM3C	FAM3C	0.261915	0.167712	1.92732	0.060612	0.512669	-4.02457
ZNF687	ZNF687	0.261908	0.130869	2.68915	0.010177	0.434922	-2.67171
CACNA2D1	CACNA2D1	-0.261651	-0.719929	-1.29993	0.200601	0.686852	-4.85799
MSN	MSN	-0.261637	-0.300573	-1.42955	0.160126	0.66032	-4.70927
CAPG	CAPG	0.261587	0.132634	1.35923	0.181212	0.672054	-4.79154
PISD	PISD	0.261568	0.111305	2.37736	0.0219902	0.45588	-3.26532
CHMP4B	CHMP4B	0.261418	-0.015178	1.83472	0.0735224	0.534213	-4.16496
CXCL12	CXCL12	-0.26134	-0.885385	-1.07041	0.290452	0.758371	-5.08937
ST6GALNAC6	ST6GALNAC6	0.261234	-0.685233	1.17111	0.248052	0.729275	-4.99298
ACP1	ACP1	0.26078	-0.134846	1.34254	0.186517	0.674694	-4.81051
NHP2	NHP2	0.260727	0.194261	1.85036	0.0711912	0.532209	-4.14165
STX6	STX6	0.260685	0.027961	1.70672	0.0951395	0.573794	-4.34947
ARAP1	ARAP1	-0.260566	0.0783244	-2.23898	0.030424	0.466783	-3.51175
GIMAP7	GIMAP7	-0.260553	-0.279165	-1.44888	0.154678	0.65692	-4.686
WARS	WARS	-0.260347	-0.0335805	-0.995951	0.324887	0.785924	-5.15539
JAGN1	JAGN1	0.260295	-0.12029	1.03082	0.308431	0.772845	-5.12503
SELENOM	SELENOM	-0.260259	-0.361849	-1.36578	0.179163	0.671674	-4.78404
PLAC9	PLAC9	-0.260043	-0.497773	-1.06506	0.292836	0.760056	-5.09426
RBM4	RBM4	-0.260005	0.0263195	-2.17331	0.035353	0.467912	-3.62478
PXDN	PXDN	-0.259942	-0.0597854	-1.74957	0.0873802	0.559199	-4.28897
CTH	CTH	0.259922	-0.191666	1.6903	0.0982618	0.579384	-4.37233
AASS	AASS	-0.259794	-0.127071	-2.01233	0.0505224	0.495188	-3.89073
DNAJC11	DNAJC11	0.259717	0.036861	1.84727	0.0716466	0.533608	-4.14627
MGAT1	MGAT1	-0.259494	0.0688098	-2.60665	0.0125416	0.439224	-2.83369
TMED4	TMED4	0.259404	0.181783	2.47292	0.0174624	0.451368	-3.08884
SLC25A10	SLC25A10	0.259358	0.138885	2.03878	0.0476957	0.48946	-3.84814
ZAK	ZAK	-0.259342	-0.303476	-1.98535	0.0535542	0.506233	-3.93371
CBL	CBL	-0.259308	-0.109524	-2.31502	0.0254882	0.464715	-3.3777
CHD3	CHD3	0.258989	0.195551	1.94592	0.0582676	0.507238	-3.99568
HLA-DPB1	HLA-DPB1	-0.258712	-0.199134	-1.27181	0.210327	0.698855	-4.88856
CR2	CR2	-0.258708	-0.875798	-1.01807	0.314381	0.77523	-5.13625
EPB41L2	EPB41L2	-0.258555	-0.11209	-1.73791	0.0894366	0.564413	-4.30555
PRIM1	PRIM1	-0.25845	0.0408162	-1.77678	0.0827317	0.552482	-4.24988
TMEM63A	TMEM63A	0.25845	0.280161	1.65141	0.105994	0.594266	-4.42569
ASPSCR1	ASPSCR1	0.25837	0.0930561	2.73238	0.00910911	0.42195	-2.5855
ARSB	ARSB	-0.257669	-0.0279146	-1.89841	0.0644159	0.522775	-4.069
CLIC4	CLIC4	-0.257496	-0.177583	-1.69117	0.0980938	0.579384	-4.37112
NSMCE1	NSMCE1	-0.257367	-0.0412969	-2.24287	0.0301518	0.466783	-3.50496
MOV10	MOV10	-0.257177	0.0931122	-2.13623	0.0384372	0.475996	-3.68746
PNPO	PNPO	0.256959	-0.0775537	1.51501	0.137141	0.644383	-4.6043
SRPRB	SRPRB	-0.256778	0.186412	-2.75118	0.00867766	0.419394	-2.54771
CRIP2	CRIP2	-0.256722	-0.375154	-1.56255	0.125543	0.627048	-4.54357
KLF5	KLF5	0.256655	0.0388569	2.14572	0.037626	0.472351	-3.6715
GALNT10	GALNT10	-0.256604	0.0839429	-1.67221	0.101798	0.586284	-4.39727
SULT1A4	SULT1A4	0.256577	-0.520944	1.15984	0.252562	0.733452	-5.00416
KCTD10	KCTD10	-0.256572	-0.214058	-2.52171	0.0154934	0.439224	-2.99685
PML	PML	-0.256429	0.174073	-2.05887	0.0456422	0.485283	-3.8155
FBLIM1	FBLIM1	-0.256365	-0.0392439	-2.17187	0.0354682	0.467912	-3.62723
ENG	ENG	-0.256288	0.145294	-2.45074	0.0184305	0.451368	-3.13025
ITLN2	ITLN2	0.255972	-0.994983	0.880407	0.383569	0.816818	-5.24888
COL5A3	COL5A3	-0.255661	-0.732349	-0.96249	0.341225	0.792674	-5.18359
C1QBP	C1QBP	0.255343	0.230241	1.84684	0.0717096	0.533608	-4.1469
LACTB2	LACTB2	0.255327	0.0758317	1.12001	0.268974	0.742237	-5.0429
SCO1	SCO1	0.255207	0.14108	2.01141	0.0506237	0.495188	-3.89221
AKAP12	AKAP12	-0.255188	-0.607051	-1.14141	0.260063	0.737003	-5.02224
KDELC2	KDELC2	-0.255133	-0.041861	-2.20458	0.0329239	0.466783	-3.57128
LEFTY1	LEFTY1	0.25512	0.0768505	0.788097	0.434995	0.847312	-5.31562
HEXB	HEXB	0.255024	-0.0062878	1.35641	0.182099	0.672054	-4.79476
EMILIN1	EMILIN1	-0.254949	-0.241749	-1.43092	0.159734	0.66032	-4.70763
VAV1	VAV1	-0.254854	-0.0839341	-2.02173	0.0495023	0.492977	-3.87565
PRDX3	PRDX3	0.254734	-0.021239	1.64772	0.106752	0.594266	-4.43069
SEC11A	SEC11A	-0.254678	0.0878951	-1.95232	0.057479	0.507238	-3.98569
MBP	MBP	-0.254406	-0.266639	-1.06933	0.290929	0.758415	-5.09035
LUZP1	LUZP1	-0.254136	0.098561	-3.83687	0.000405987	0.206054	-0.126678
FLNA	FLNA	-0.254073	-1.25037	-0.889929	0.378492	0.814388	-5.24159
SEC23A	SEC23A	-0.253967	0.0516512	-2.81321	0.00738507	0.409468	-2.42189
HNMT	HNMT	0.253898	-0.165576	1.43997	0.157171	0.658647	-4.69676
APOL2	APOL2	-0.253842	0.10101	-1.16525	0.250387	0.731026	-4.9988
MYO1G	MYO1G	-0.253772	-0.116656	-1.56832	0.12419	0.62459	-4.53609
RAD23B	RAD23B	0.253457	-0.0244756	2.42257	0.0197304	0.451368	-3.18245
CRYL1	CRYL1	0.253343	-0.120876	1.42263	0.16211	0.662072	-4.71752
NUCB2	NUCB2	-0.253258	-0.108224	-1.3517	0.183593	0.673044	-4.80013
CDH5	CDH5	-0.253189	-0.306337	-1.61062	0.114633	0.60282	-4.4805
NCF2	NCF2	-0.252895	0.0524927	-1.1756	0.246269	0.729212	-4.98848
ENTPD5	ENTPD5	0.252893	-0.664546	1.14933	0.25682	0.735648	-5.01451
EXOC8	EXOC8	0.252816	0.0457024	2.82432	0.00717328	0.406581	-2.39916
EIF6	EIF6	0.25272	0.069922	1.63963	0.108433	0.595907	-4.44164
SSR2	SSR2	0.252591	-0.0674	0.97032	0.337353	0.792421	-5.17708
GPATCH1	GPATCH1	-0.252364	-0.508837	-1.30949	0.197372	0.684968	-4.84746
DKC1	DKC1	0.252285	0.242361	2.35777	0.0230398	0.45588	-3.30087
MYO1F	MYO1F	-0.252243	-0.0109829	-1.6873	0.0988418	0.580729	-4.37649
CTNNB1	CTNNB1	0.252182	0.10362	1.68116	0.100036	0.58487	-4.38496
DCLK1	DCLK1	-0.252162	-0.670968	-1.50613	0.1394	0.645978	-4.61546
DIAPH2	DIAPH2	0.252128	0.0303951	2.40378	0.0206426	0.451368	-3.21702
CPVL	CPVL	0.251965	-0.374078	1.50743	0.139067	0.645747	-4.61383
MTMR9	MTMR9	-0.251918	-0.320086	-2.04464	0.0470888	0.48946	-3.83865
FGG	FGG	-0.251773	-0.575939	-0.541941	0.590677	0.906527	-5.45839
MAN2A1	MAN2A1	-0.251754	0.0485463	-1.956	0.0570303	0.507238	-3.97994
DSG2	DSG2	0.251604	0.149071	2.07112	0.0444278	0.480751	-3.79547
RDH10	RDH10	0.251535	0.136646	1.46512	0.150217	0.654212	-4.66624
PRKACA	PRKACA	-0.250965	-0.177602	-2.2063	0.0327949	0.466783	-3.56832
TMEM168	TMEM168	-0.25089	0.0485482	-2.0563	0.0459009	0.485283	-3.8197
LAMA4	LAMA4	-0.250844	-0.484663	-1.62375	0.111793	0.599613	-4.463
KHNYN	KHNYN	0.250832	0.015062	2.20129	0.0331726	0.466783	-3.57694
CRYM	CRYM	0.250664	-0.361901	1.10794	0.274093	0.745714	-5.05439
ALDH7A1	ALDH7A1	0.250599	-0.136378	1.46691	0.149731	0.653821	-4.66405
ITPK1	ITPK1	0.250593	-0.0623073	2.40206	0.0207282	0.451368	-3.22018
PACS1	PACS1	-0.250418	-0.0843293	-2.97142	0.0048532	0.383716	-2.09301
GSTK1	GSTK1	0.250365	0.114871	1.32458	0.192358	0.680798	-4.83069
SSPN	SSPN	-0.250142	-0.308953	-2.09712	0.0419438	0.480146	-3.75265
NOL10	NOL10	0.249897	0.230859	2.3133	0.0255914	0.464715	-3.38077
PSPH	PSPH	-0.249851	0.085072	-1.49316	0.142751	0.647483	-4.63165
RBM28	RBM28	0.24981	0.325471	1.83429	0.0735875	0.534213	-4.1656
ARHGEF17	ARHGEF17	-0.249771	-0.23439	-1.62254	0.112053	0.599613	-4.46462
CD34	CD34	-0.249744	-1.02122	-0.967971	0.338512	0.792421	-5.17904
COMMD2	COMMD2	-0.249733	-0.0132195	-2.73197	0.00911867	0.42195	-2.58632
TSN	TSN	0.249711	0.160415	2.22717	0.0312625	0.466783	-3.53226
HSPA12B	HSPA12B	-0.249612	-0.401514	-2.05421	0.0461112	0.485283	-3.82309
PARVG	PARVG	-0.249177	-0.0928509	-1.5053	0.139613	0.645978	-4.6165
IFIT5	IFIT5	-0.249158	-0.0404244	-1.66835	0.102566	0.588059	-4.40257
DST	DST	-0.248875	-0.166756	-2.62699	0.0119159	0.434922	-2.79407
VPS37C	VPS37C	-0.248781	-0.0683685	-1.97192	0.0551213	0.507238	-3.95493
NUDT5	NUDT5	0.248732	-0.191288	0.963921	0.340515	0.792674	-5.18241
PHB	PHB	0.24871	0.140029	2.15861	0.0365486	0.470272	-3.64973
PPP1R14A	PPP1R14A	-0.248652	-1.43449	-0.947997	0.348467	0.796118	-5.19552
ELMO2	ELMO2	-0.248301	-0.0958927	-2.07803	0.0437558	0.480751	-3.78414
UBXN4	UBXN4	-0.248048	0.162554	-2.23415	0.0307641	0.466783	-3.52014
MMP14	MMP14	-0.24804	0.249659	-1.65071	0.106139	0.594266	-4.42665
HBG1	HBG1	0.247775	-1.08149	0.712104	0.480275	0.862175	-5.3652
AP1M1	AP1M1	-0.247523	0.040122	-2.53339	0.0150529	0.439224	-2.97463
MPDU1	MPDU1	-0.247511	-0.142532	-1.17968	0.244659	0.728056	-4.98439
ACSL1	ACSL1	-0.247455	-0.117276	-1.3224	0.193077	0.680877	-4.83313
APOE	APOE	-0.247401	-0.380173	-1.01542	0.315627	0.77523	-5.13856
TMEM186	TMEM186	0.247345	0.0845281	1.78967	0.0806033	0.548117	-4.23118
NOM1	NOM1	0.247242	0.19852	1.6716	0.10192	0.586284	-4.39812
SMIM12	SMIM12	-0.247233	0.00776135	-1.6741	0.101424	0.586284	-4.39468
DDX5	DDX5	-0.24721	0.308978	-2.05127	0.0464101	0.485283	-3.82788
MAP2K3	MAP2K3	-0.246968	0.087622	-2.44027	0.0189043	0.451368	-3.1497
DIABLO	DIABLO	0.246633	0.0667171	1.87857	0.0671436	0.527539	-4.09918
RHOC	RHOC	0.246586	-0.0963463	1.4038	0.167613	0.662134	-4.73983
FARP1	FARP1	-0.246443	-0.167132	-1.81772	0.0761308	0.540768	-4.19012
ANKLE2	ANKLE2	-0.246406	-0.0122434	-1.67905	0.10045	0.58487	-4.38788
VAMP7	VAMP7	-0.245518	0.0238683	-1.32287	0.192923	0.680877	-4.83261
TBXAS1	TBXAS1	-0.24545	0.0849927	-1.84344	0.072215	0.533608	-4.15198
NUDT2	NUDT2	-0.245448	-0.106276	-2.07044	0.0444941	0.480751	-3.79658
CFH	CFH	-0.245434	-0.405498	-1.20888	0.233361	0.718903	-4.95474
COMMD8	COMMD8	-0.245401	-0.0506341	-1.53748	0.131555	0.639749	-4.57579
OASL	OASL	-0.245381	0.0547117	-1.88381	0.0664138	0.527539	-4.09124
ATPIF1	ATPIF1	0.245003	0.0196561	1.35095	0.18383	0.673044	-4.80098
MTMR12	MTMR12	-0.244856	-0.245749	-1.95173	0.0575517	0.507238	-3.98662
RDX	RDX	-0.24472	-0.32961	-1.82148	0.0755464	0.54039	-4.18456
ITPR2	ITPR2	-0.244668	0.132883	-1.72821	0.0911785	0.565706	-4.31928
ATP6AP2	ATP6AP2	0.244648	0.0452439	1.5816	0.121124	0.619516	-4.51878
LAP3	LAP3	-0.24461	-0.0493073	-1.08445	0.284253	0.75312	-5.07641
2024-09-01	2024-09-01	-0.244598	-0.308684	-1.54757	0.129108	0.63524	-4.56288
TSPAN31	TSPAN31	-0.244507	-0.238055	-2.26622	0.0285657	0.466783	-3.46411
NUDT16	NUDT16	-0.244366	-0.140498	-2.63517	0.0116723	0.434922	-2.77807
RAB3D	RAB3D	0.24434	0.0276293	1.24588	0.219602	0.707142	-4.9162
APOB	APOB	-0.244059	-0.425515	-1.11799	0.269826	0.742724	-5.04483
ATP9A	ATP9A	0.243951	-0.125412	1.78424	0.0814938	0.549796	-4.23907
RECQL	RECQL	-0.243936	0.185	-2.25787	0.0291243	0.466783	-3.47876
LTF	LTF	-0.243887	-0.147205	-0.572301	0.57012	0.896092	-5.44358
TBCB	TBCB	0.243479	-0.196588	1.41575	0.164105	0.662134	-4.72571
MCRIP1	MCRIP1	-0.243386	0.130749	-1.69649	0.0970753	0.577572	-4.36374
NFKBIB	NFKBIB	-0.243329	0.0206221	-2.51457	0.0157684	0.439224	-3.01039
LMAN1	LMAN1	-0.243266	0.138722	-1.4612	0.151283	0.656255	-4.67102
SUMO2	SUMO2	0.243239	0.069022	1.50173	0.140529	0.647319	-4.62096
SDF2	SDF2	-0.243134	0.0890073	-1.83907	0.0728677	0.533608	-4.15849
CEACAM1	CEACAM1	0.242964	-0.279941	1.26231	0.213692	0.701813	-4.89876
ITGAV	ITGAV	-0.242914	-0.0562756	-2.03674	0.0479085	0.48946	-3.85144
SWAP70	SWAP70	-0.2427	0.0170463	-2.69431	0.0100438	0.434922	-2.66147
AKR1C2	AKR1C2	-0.242658	-0.757941	-0.743809	0.461067	0.852972	-5.34511
MICAL1	MICAL1	-0.242259	0.0411244	-2.20019	0.0332561	0.466783	-3.57883
FBN1	FBN1	-0.242235	-0.358883	-0.909966	0.36795	0.807898	-5.22601
FABP6	FABP6	-0.241849	-1.94387	-0.528281	0.60004	0.908793	-5.4648
SLC15A4	SLC15A4	-0.241755	0.0639407	-1.78959	0.0806155	0.548117	-4.23129
NCF1	NCF1	-0.241723	-0.0526049	-1.04425	0.302247	0.768816	-5.11307
COQ6	COQ6	0.24157	-0.0476756	2.1111	0.0406595	0.477115	-3.72946
RPL39	RPL39	0.241497	0.0597366	1.5782	0.121902	0.622317	-4.52322
TRAPPC2L	TRAPPC2L	0.241426	-0.0916634	2.19542	0.03362	0.466783	-3.58702
FAM114A2	FAM114A2	-0.241216	-0.0607341	-2.6505	0.0112283	0.434922	-2.74801
MTIF2	MTIF2	0.241099	0.0968585	1.86058	0.069702	0.529222	-4.12633
SGCD	SGCD	-0.241034	-0.484254	-1.20544	0.234675	0.72032	-4.95827
LTV1	LTV1	-0.240816	0.165122	-1.93802	0.0592536	0.50852	-4.00798
PDXP	PDXP	0.240742	-0.214007	1.94656	0.0581882	0.507238	-3.99468
IFITM1	IFITM1	0.240606	-0.117934	1.02221	0.312438	0.774754	-5.13261
EPS8L2	EPS8L2	0.240487	0.0348585	2.20283	0.0330555	0.466783	-3.57428
ARHGAP4	ARHGAP4	-0.24011	0.0214805	-1.88478	0.0662794	0.527539	-4.08976
GALNT2	GALNT2	-0.240013	0.177583	-2.37409	0.0221623	0.45588	-3.27126
HINT3	HINT3	0.240009	-0.0707463	2.13493	0.038549	0.475996	-3.68964
PTGES2	PTGES2	0.239885	0.0542171	2.11508	0.0403	0.476854	-3.72283
H2AFY	H2AFY	0.239697	0.21992	2.01573	0.0501516	0.495188	-3.88529
2024-09-05	2024-09-05	-0.23966	-0.270615	-1.63075	0.1103	0.599613	-4.4536
HSDL2	HSDL2	0.239121	-0.0652976	1.48437	0.145059	0.650349	-4.64255
EVPL	EVPL	0.238865	-0.361876	0.760562	0.4511	0.85097	-5.33415
PARVA	PARVA	-0.238858	-0.614685	-1.34865	0.184562	0.673586	-4.80359
PPM1A	PPM1A	0.238576	-0.332461	1.66776	0.102684	0.588059	-4.40338
PYURF	PYURF	0.238476	-0.128839	1.41703	0.163732	0.662134	-4.72419
CD163	CD163	-0.238425	-0.274134	-1.31443	0.195721	0.683985	-4.84199
ENOSF1	ENOSF1	0.238409	-0.3611	1.42676	0.160922	0.661221	-4.7126
GAS7	GAS7	-0.238208	-0.303369	-1.69032	0.0982586	0.579384	-4.3723
HCK	HCK	-0.238106	0.00948293	-1.52058	0.13574	0.644108	-4.59727
H1F0	H1F0	0.237991	-0.274849	1.13354	0.263314	0.74024	-5.02988
TAF8	TAF8	-0.237989	-0.238989	-1.08405	0.284429	0.75312	-5.07678
PSAP	PSAP	0.237886	-0.114578	1.04728	0.300864	0.768063	-5.11035
CEP170	CEP170	-0.237842	0.026222	-1.91785	0.0618365	0.519641	-4.03919
EPCAM	EPCAM	0.2378	-0.036522	1.61399	0.113899	0.60282	-4.47602
DUSP23	DUSP23	0.237733	0.129363	1.70724	0.095042	0.57373	-4.34874
DHRS1	DHRS1	0.237337	-0.156683	1.31723	0.194789	0.683264	-4.83889
IFIH1	IFIH1	-0.237196	0.0255823	-1.66963	0.102311	0.588019	-4.40082
SORBS2	SORBS2	-0.236935	-1.13152	-0.919146	0.363184	0.806289	-5.21876
PIGS	PIGS	-0.236714	0.0280854	-1.95743	0.0568563	0.507238	-3.9777
LGALS3	LGALS3	0.236618	-0.2009	1.14116	0.260166	0.737003	-5.02249
GCNT3	GCNT3	-0.236543	-0.323437	-0.9379	0.353572	0.797526	-5.20373
MPC2	MPC2	-0.236416	-0.19258	-1.49614	0.141975	0.647376	-4.62794
ZFYVE21	ZFYVE21	0.236389	-0.251298	1.93285	0.0599071	0.511337	-4.01601
OSBPL3	OSBPL3	0.23621	0.229085	2.11644	0.0401779	0.476854	-3.72057
SULT1B1	SULT1B1	0.236173	-0.656141	0.83214	0.409961	0.830751	-5.28467
L3HYPDH	L3HYPDH	-0.236123	-0.199154	-1.30922	0.197464	0.684968	-4.84776
GOSR1	GOSR1	-0.236117	0.11332	-1.68228	0.0998173	0.58487	-4.38342
DNAJB5	DNAJB5	-0.23611	-1.14694	-1.08314	0.284828	0.75312	-5.07763
FRK	FRK	-0.236075	-0.0309587	-2.34958	0.0234918	0.45588	-3.31567
NAXE	NAXE	0.236021	-0.023278	1.62099	0.112384	0.600415	-4.46668
GOLGA1	GOLGA1	-0.236014	-0.161557	-1.0152	0.315731	0.77523	-5.13875
B4GALNT2	B4GALNT2	0.235969	-0.401195	1.20722	0.233996	0.719098	-4.95645
TRIM28	TRIM28	0.235934	0.276112	2.04573	0.0469761	0.48946	-3.83687
C14orf1	C14orf1	-0.235807	-0.0386233	-0.972002	0.336525	0.791477	-5.17567
MKI67	MKI67	-0.23567	0.142527	-1.33929	0.187565	0.675276	-4.81419
HSPD1	HSPD1	0.235555	0.230163	1.73298	0.0903185	0.565706	-4.31254
PELP1	PELP1	0.235399	0.154829	2.14158	0.0379775	0.473678	-3.67846
ARHGEF5	ARHGEF5	0.235383	0.0794431	1.89236	0.0652379	0.524927	-4.07824
PAFAH1B2	PAFAH1B2	0.235166	-0.2771	0.836901	0.407309	0.82792	-5.28122
ATAD3A	ATAD3A	0.235155	0.318754	1.86555	0.0689872	0.528352	-4.11886
TVP23C	TVP23C	-0.235113	-0.213106	-0.85015	0.399985	0.822292	-5.27154
ZNF622	ZNF622	0.235082	0.153466	2.04087	0.047479	0.48946	-3.84477
PALLD	PALLD	-0.235077	-0.741937	-1.18766	0.241534	0.725441	-4.97636
S100A13	S100A13	0.235074	-0.260961	1.71591	0.0934289	0.57131	-4.3366
HBZ	HBZ	-0.234876	-0.461844	-0.760693	0.451022	0.85097	-5.33406
TMLHE	TMLHE	0.234509	-0.0777317	0.886638	0.380242	0.814388	-5.24412
TM9SF4	TM9SF4	0.234488	0.112207	1.71789	0.0930635	0.570663	-4.33382
KCTD12	KCTD12	-0.234348	-0.300783	-1.49909	0.14121	0.647319	-4.62426
FHOD1	FHOD1	-0.234166	-0.0231585	-2.68482	0.0102903	0.434922	-2.68031
IDUA	IDUA	-0.234024	-0.108959	-1.55706	0.126839	0.629237	-4.55066
ACE2	ACE2	0.23384	-0.351176	0.592221	0.556827	0.890653	-5.43344
CTPS1	CTPS1	-0.233834	-0.0817951	-1.72535	0.0916987	0.566402	-4.32332
RGS19	RGS19	-0.233817	-0.00607073	-1.61539	0.113594	0.60282	-4.47415
NOA1	NOA1	-0.233782	0.0430195	-1.67379	0.101486	0.586284	-4.39511
PEF1	PEF1	0.233703	0.0110195	2.30438	0.0261326	0.465739	-3.39665
DOCK10	DOCK10	-0.233661	-0.284141	-1.31247	0.196376	0.684968	-4.84417
GFER	GFER	0.233481	-0.0799732	1.74111	0.0888685	0.563194	-4.30101
GLOD4	GLOD4	0.233463	-0.186393	1.39535	0.170128	0.664598	-4.74975
SEC24A	SEC24A	-0.23346	0.0938902	-2.92382	0.00551337	0.383716	-2.19312
LDHA	LDHA	-0.233399	0.162832	-1.72783	0.0912476	0.565706	-4.31982
MTG1	MTG1	0.233205	0.0713195	1.92634	0.0607379	0.512669	-4.02608
FES	FES	-0.232921	-0.183008	-1.55524	0.127274	0.630432	-4.55302
DPYSL4	DPYSL4	-0.232752	-0.160484	-1.14834	0.257222	0.735648	-5.01547
GGACT	GGACT	0.232745	-0.313574	1.41169	0.165289	0.662134	-4.73051
RALA	RALA	0.232677	0.157554	2.00589	0.0512324	0.496418	-3.90103
GLB1	GLB1	0.232665	-0.165337	1.1461	0.258136	0.735648	-5.01766
SLC12A2	SLC12A2	-0.232663	0.135668	-1.09506	0.279629	0.752445	-5.06651
RBM6	RBM6	-0.232607	-0.165276	-1.51014	0.138376	0.645747	-4.61042
MOB4	MOB4	-0.232529	-0.0109805	-2.10219	0.0414738	0.477115	-3.74425
C6orf47	C6orf47	-0.232523	-0.0712909	-2.03682	0.0479006	0.48946	-3.85131
CNDP2	CNDP2	0.2325	-0.182241	0.853833	0.397964	0.822093	-5.26882
SOX9	SOX9	0.23249	0.142993	1.22971	0.225542	0.713728	-4.93318
RIOX2	RIOX2	0.232406	0.146918	1.55419	0.127523	0.630731	-4.55437
LAPTM4A	LAPTM4A	0.2324	0.0733648	2.12546	0.0393761	0.476854	-3.70551
APAF1	APAF1	-0.232339	-0.0250732	-2.69744	0.00996379	0.434922	-2.65526
ELOVL1	ELOVL1	0.232166	0.140141	1.32402	0.192541	0.680798	-4.83132
PIK3AP1	PIK3AP1	-0.23214	0.129436	-1.68949	0.0984173	0.579646	-4.37344
THEM6	THEM6	0.23207	0.069139	2.00108	0.0517684	0.496418	-3.90871
ACP6	ACP6	0.23195	0.117188	1.54515	0.129693	0.635818	-4.56599
COX20	COX20	0.231872	0.176027	1.82063	0.0756775	0.54039	-4.18581
PLEKHA5	PLEKHA5	0.231849	0.0416	2.16935	0.0356714	0.467912	-3.63151
TCEAL4	TCEAL4	0.231819	0.00181219	1.60829	0.115143	0.603678	-4.48359
MLKL	MLKL	-0.231777	0.146288	-1.83121	0.0740549	0.535761	-4.17017
PPP2CB	PPP2CB	0.231768	-0.307559	1.20899	0.233321	0.718903	-4.95463
C11orf54	C11orf54	0.231698	-0.470671	0.913758	0.365977	0.806895	-5.22302
PKP4	PKP4	0.231617	0.0494466	1.52729	0.134065	0.641307	-4.58877
CAMP	CAMP	-0.23151	-0.136532	-0.527571	0.600529	0.908793	-5.46513
DLG3	DLG3	-0.231442	-0.113562	-1.25462	0.216443	0.705577	-4.90695
PTRF	PTRF	-0.231378	-1.16063	-1.11039	0.273047	0.744807	-5.05206
ARHGEF1	ARHGEF1	0.231275	0.157415	2.30768	0.0259309	0.464925	-3.39077
INTS13	INTS13	-0.231243	0.0589049	-1.19289	0.2395	0.723369	-4.97106
MLYCD	MLYCD	0.231102	-0.081261	2.27118	0.0282384	0.466783	-3.45539
S100A16	S100A16	0.231064	-0.0104317	0.99134	0.327106	0.786301	-5.15933
SRPRA	SRPRA	-0.231041	0.23988	-2.54738	0.0145405	0.439224	-2.94793
MX2	MX2	-0.230751	0.0503317	-1.27853	0.207969	0.696595	-4.88131
TMEM65	TMEM65	0.230664	0.0555249	1.54436	0.129883	0.635818	-4.567
PCYT2	PCYT2	0.230371	-0.0281683	1.93039	0.0602197	0.512008	-4.01982
SH3GLB2	SH3GLB2	0.230359	-0.108815	2.58463	0.0132529	0.439224	-2.87635
ERLEC1	ERLEC1	-0.230306	0.0986512	-2.5619	0.0140255	0.439224	-2.92011
PLEKHF2	PLEKHF2	0.230058	-0.121875	1.9905	0.0529642	0.502817	-3.92555
LGALS4	LGALS4	0.229957	-0.638356	0.790659	0.433514	0.846752	-5.31387
GYPA	GYPA	-0.22952	-0.715973	-1.20085	0.236431	0.721209	-4.96297
TLN1	TLN1	-0.229506	-0.517429	-1.60743	0.115333	0.603942	-4.48474
TMEM30B	TMEM30B	0.229448	-0.252015	1.66004	0.104236	0.590342	-4.41394
SLC25A15	SLC25A15	0.229325	0.265515	1.03992	0.304233	0.769166	-5.11695
ILK	ILK	-0.229228	-0.652868	-1.44931	0.154559	0.65692	-4.68548
RASAL3	RASAL3	-0.228994	-0.230572	-1.6238	0.111782	0.599613	-4.46293
NMT2	NMT2	0.228935	0.00524146	1.88382	0.0664126	0.527539	-4.09122
DCK	DCK	-0.228869	0.0665322	-2.08402	0.0431798	0.480751	-3.77428
INTS7	INTS7	-0.228848	0.0404683	-2.21832	0.0319043	0.466783	-3.54758
PAFAH2	PAFAH2	0.228739	-0.119739	1.41653	0.163877	0.662134	-4.72478
PURB	PURB	0.228733	0.0945098	1.89516	0.0648568	0.523776	-4.07397
QDPR	QDPR	0.228682	-0.421817	1.20009	0.236722	0.721761	-4.96374
C1orf174	C1orf174	0.228628	-0.00713801	2.17811	0.0349696	0.467912	-3.6166
BDH1	BDH1	0.228613	-0.152985	1.02733	0.310053	0.774754	-5.12812
RRM2B	RRM2B	0.228538	0.00542927	1.99302	0.0526773	0.501537	-3.92155
PTGIS	PTGIS	-0.228486	-0.426402	-0.895572	0.375504	0.814076	-5.23724
LIME1	LIME1	0.228395	-0.32731	0.976907	0.334119	0.789641	-5.17155
NUDT4	NUDT4	0.228393	0.0101195	1.3763	0.175906	0.671057	-4.77191
FGB	FGB	-0.228365	-0.588098	-0.482175	0.632145	0.92032	-5.48522
POFUT1	POFUT1	0.228354	0.00901707	1.40651	0.166812	0.662134	-4.73663
TMEM87B	TMEM87B	-0.228277	0.169912	-1.96668	0.0557431	0.507238	-3.96318
GMFG	GMFG	-0.228199	-0.0505268	-1.48089	0.14598	0.652454	-4.64685
BCCIP	BCCIP	-0.227917	0.0355756	-1.41002	0.165778	0.662134	-4.73249
BCKDHB	BCKDHB	0.227872	-0.0339293	1.35978	0.181039	0.672054	-4.79091
RABIF	RABIF	-0.22775	-0.0675106	-1.94049	0.0589434	0.507895	-4.00413
PHYH	PHYH	0.227717	-0.0635415	1.67973	0.100316	0.58487	-4.38694
GNB4	GNB4	-0.227586	-0.404561	-1.65278	0.105713	0.594266	-4.42382
DSP	DSP	0.227584	0.0866512	1.37679	0.175757	0.671057	-4.77135
WDR36	WDR36	0.227576	0.253368	2.26951	0.0283481	0.466783	-3.45832
EXOC4	EXOC4	0.227514	0.010639	2.66951	0.0106996	0.434922	-2.71059
KRT17	KRT17	0.227416	-0.251451	0.559451	0.578778	0.90023	-5.44995
SURF6	SURF6	0.226905	0.281215	1.64	0.108356	0.595907	-4.44114
NCAPD2	NCAPD2	-0.226868	0.16769	-1.30872	0.19763	0.684968	-4.84831
ARF6	ARF6	0.226823	-0.112088	2.2656	0.0286069	0.466783	-3.4652
DOK1	DOK1	-0.226805	-0.0894146	-1.81523	0.0765181	0.540768	-4.19377
DYNC1I1	DYNC1I1	0.226784	-0.91253	0.687846	0.495271	0.867372	-5.37999
NUFIP2	NUFIP2	-0.226748	0.222785	-2.35045	0.0234433	0.45588	-3.31409
COPG1	COPG1	-0.226708	0.0714317	-2.1158	0.040235	0.476854	-3.72163
MRC1	MRC1	-0.226365	-0.328659	-1.15607	0.254081	0.734633	-5.00788
ADA	ADA	0.226313	-0.108615	1.29185	0.203361	0.690151	-4.86685
LUC7L	LUC7L	-0.226236	0.100363	-1.46865	0.149259	0.653386	-4.66191
TCF12	TCF12	-0.226235	0.100706	-1.46773	0.149509	0.653717	-4.66304
PPP1R11	PPP1R11	0.226157	-0.125673	1.52244	0.135273	0.644108	-4.59491
MPP1	MPP1	-0.226087	-0.291298	-1.52544	0.134526	0.642259	-4.59112
BST1	BST1	-0.226075	-0.0493293	-1.23803	0.22247	0.710484	-4.92447
DNAJB1	DNAJB1	0.225986	0.147354	2.06999	0.0445384	0.480751	-3.79732
ELOF1	ELOF1	0.225893	-0.0895068	1.60989	0.114793	0.60282	-4.48147
HYOU1	HYOU1	-0.225672	0.0660122	-2.25158	0.029551	0.466783	-3.48976
ERGIC1	ERGIC1	-0.225594	-0.0187488	-1.86637	0.0688697	0.528352	-4.11762
NCKAP1L	NCKAP1L	-0.22556	-0.10472	-1.66426	0.103385	0.589089	-4.40817
YIF1A	YIF1A	-0.225538	-0.0445927	-1.71814	0.0930174	0.570663	-4.33347
ZFPL1	ZFPL1	-0.225392	0.117105	-1.79457	0.0798062	0.548117	-4.22405
EWSR1	EWSR1	0.225383	0.253724	1.95559	0.0570796	0.507238	-3.98058
SRC	SRC	0.225337	-0.0380732	2.32198	0.0250741	0.464715	-3.36525
CAPN6	CAPN6	-0.225326	0.00621803	-1.1794	0.24477	0.728056	-4.98468
HIST1H1E	HIST1H1E	-0.225292	-0.289251	-0.624727	0.535475	0.883678	-5.41615
ELOA	ELOA	-0.225239	-0.0575257	-1.85847	0.0700075	0.529707	-4.1295
SNRPF	SNRPF	0.225159	0.157144	1.25539	0.216168	0.705577	-4.90613
ATP6V1B2	ATP6V1B2	-0.225156	-0.00952439	-2.59822	0.0128098	0.439224	-2.85006
TUBB1	TUBB1	-0.225147	-0.16482	-2.14986	0.0372768	0.470272	-3.66452
COQ7	COQ7	0.225117	-0.0755122	1.73437	0.0900689	0.565437	-4.31057
SERPINE2	SERPINE2	0.225027	0.103224	0.765383	0.448255	0.85097	-5.33095
SLC33A1	SLC33A1	-0.224959	0.071722	-1.85291	0.0708163	0.531566	-4.13783
AVEN	AVEN	-0.224869	-0.0245702	-1.74228	0.0886613	0.563194	-4.29935
SNU13	SNU13	0.224731	0.268056	2.29414	0.0267666	0.465828	-3.41484
GIT2	GIT2	-0.224163	-0.0976878	-2.82225	0.00721237	0.406581	-2.40341
ARHGAP12	ARHGAP12	0.224088	0.119235	2.17242	0.0354244	0.467912	-3.6263
CYGB	CYGB	-0.224061	-0.217556	-1.91619	0.0620528	0.519641	-4.04174
NFIA	NFIA	-0.224041	-0.187039	-1.67684	0.100884	0.584914	-4.39092
WARS2	WARS2	0.224031	0.0666024	1.69146	0.0980391	0.579384	-4.37072
DBN1	DBN1	-0.224022	-0.0740317	-1.45765	0.152255	0.656872	-4.67535
CCL24	CCL24	0.223866	0.137918	0.868212	0.390134	0.818913	-5.25811
QTRT1	QTRT1	0.223852	-0.0575805	1.72778	0.091258	0.565706	-4.3199
GLG1	GLG1	-0.223733	0.192388	-1.83023	0.0742034	0.536143	-4.17162
KANK3	KANK3	-0.223351	-0.283536	-1.94369	0.0585446	0.507592	-3.99916
FAU	FAU	-0.223137	0.1816	-1.62512	0.111499	0.599613	-4.46115
RAI14	RAI14	-0.223118	0.0101073	-1.54389	0.129997	0.635818	-4.5676
UQCC1	UQCC1	0.22304	0.179698	1.25028	0.218008	0.706144	-4.91155
EXOC2	EXOC2	0.223029	-0.00650488	2.47139	0.0175278	0.451368	-3.09171
ATP5J	ATP5J	0.222763	-0.390863	1.08809	0.28266	0.75312	-5.07302
CISD3	CISD3	0.222637	-0.275888	1.12197	0.268149	0.741822	-5.04102
CTSA	CTSA	0.22214	-0.175822	1.44824	0.154857	0.65692	-4.68678
TACC3	TACC3	-0.222071	0.121636	-1.30648	0.198384	0.685666	-4.85078
A2M	A2M	-0.222017	-0.837829	-0.953161	0.345875	0.793493	-5.19129
ARHGEF16	ARHGEF16	0.22194	0.107812	1.58213	0.121001	0.619516	-4.51808
HAPLN3	HAPLN3	-0.221863	0.0353155	-1.01392	0.316334	0.775783	-5.13987
NT5C2	NT5C2	0.221759	0.0729976	1.98211	0.0539292	0.507238	-3.93885
VSIG4	VSIG4	-0.221731	-0.427941	-0.951486	0.346714	0.794074	-5.19267
SNX5	SNX5	-0.221697	-0.0653902	-2.21736	0.0319747	0.466783	-3.54924
FBXO30	FBXO30	-0.221691	-0.241573	-1.95643	0.056978	0.507238	-3.97927
TMEM2	TMEM2	-0.221662	0.135131	-1.97438	0.0548319	0.507238	-3.95106
NCOA2	NCOA2	0.221568	0.0839345	2.36682	0.0225492	0.45588	-3.28446
KIF2A	KIF2A	-0.221556	0.149022	-1.77077	0.0837406	0.553451	-4.25856
PRKCB	PRKCB	-0.221469	-0.580368	-1.40172	0.168227	0.662134	-4.74227
LAMA2	LAMA2	-0.221468	-0.45548	-1.5734	0.12301	0.622396	-4.52948
POLD2	POLD2	-0.221394	0.144195	-1.87964	0.0669944	0.527539	-4.09757
KRT16	KRT16	0.221362	-0.0960156	1.48245	0.145567	0.651613	-4.64493
PSMB7	PSMB7	0.221331	0.0269317	1.73163	0.0905619	0.565706	-4.31445
JCHAIN	JCHAIN	-0.221275	-1.17152	-0.870603	0.388841	0.817582	-5.25631
TIMM8A	TIMM8A	0.221199	0.153668	1.13042	0.264612	0.740548	-5.0329
CLEC3B	CLEC3B	-0.221116	-0.313022	-0.986904	0.329251	0.787	-5.16311
SGCB	SGCB	-0.221095	-0.498993	-1.10164	0.276792	0.74878	-5.06034
FARSA	FARSA	0.221026	0.153159	1.95008	0.0577537	0.507238	-3.98919
MRPL35	MRPL35	0.221023	0.0534517	1.95385	0.0572915	0.507238	-3.9833
ACSL4	ACSL4	-0.220981	0.165817	-1.45594	0.152726	0.656872	-4.67743
FMN1	FMN1	0.220846	-0.307731	1.32652	0.19172	0.680798	-4.82852
TCP11L1	TCP11L1	-0.220792	-0.102574	-2.36157	0.0228324	0.45588	-3.29398
ARMCX3	ARMCX3	-0.220764	0.121115	-1.36956	0.177986	0.671674	-4.77969
MAVS	MAVS	0.220635	-0.0592585	1.49303	0.142784	0.647483	-4.63181
CCDC50	CCDC50	-0.220615	-0.195146	-2.1841	0.0344971	0.467624	-3.60638
MEST	MEST	0.220546	0.0273044	1.90266	0.0638449	0.521348	-4.06251
TOR1B	TOR1B	-0.220462	-0.0384098	-1.89668	0.0646503	0.52339	-4.07165
SMC6	SMC6	-0.220351	-0.0208634	-1.76416	0.0848604	0.55508	-4.26806
ATG12	ATG12	0.220256	0.0949305	2.07085	0.0444539	0.480751	-3.79591
COL5A1	COL5A1	-0.220132	-0.418934	-0.960157	0.342384	0.792674	-5.18553
GMPR	GMPR	-0.21999	-0.230488	-1.22091	0.228821	0.715578	-4.94233
EI24	EI24	-0.219987	0.0679951	-1.34009	0.187306	0.675276	-4.81328
SNRNP27	SNRNP27	-0.219971	0.105442	-1.87701	0.0673622	0.527539	-4.10155
KANK2	KANK2	-0.219811	-0.766329	-1.18781	0.241474	0.725441	-4.9762
HDLBP	HDLBP	-0.219805	0.132466	-2.3247	0.0249143	0.464715	-3.36039
ACP5	ACP5	0.219559	-0.0983447	1.97289	0.0550063	0.507238	-3.9534
VPS29	VPS29	0.219492	-0.2117	1.01346	0.316552	0.775783	-5.14027
MGLL	MGLL	0.21945	-0.327578	1.53909	0.131163	0.639155	-4.57374
ZFP36L2	ZFP36L2	0.219299	0.176551	1.31681	0.194929	0.68339	-4.83935
TMEM106B	TMEM106B	0.21923	0.0430049	1.01658	0.315083	0.77523	-5.13755
DNPH1	DNPH1	0.219079	-0.185544	1.14368	0.259128	0.736578	-5.02003
STX3	STX3	0.219068	0.0467756	1.03679	0.305671	0.769941	-5.11973
SPAG7	SPAG7	0.219068	-0.0138463	1.97885	0.0543081	0.507238	-3.944
TUBB2B	TUBB2B	0.219035	-1.20773	0.640221	0.525451	0.878593	-5.40759
SYAP1	SYAP1	-0.218987	0.019339	-1.75915	0.085719	0.555573	-4.27526
KIF4A	KIF4A	-0.218954	0.0191445	-1.28729	0.204931	0.691552	-4.87182
ZMPSTE24	ZMPSTE24	-0.218915	0.176105	-2.10651	0.041077	0.477115	-3.73708
SSR1	SSR1	-0.218858	0.220605	-2.10469	0.0412443	0.477115	-3.74011
PUS1	PUS1	0.218676	0.255515	1.96912	0.0554534	0.507238	-3.95935
F11R	F11R	0.21864	0.111088	1.48717	0.144319	0.649977	-4.63908
TFRC	TFRC	-0.218604	0.0633512	-1.10415	0.275714	0.746912	-5.05797
KPNA2	KPNA2	-0.218494	0.289532	-1.12824	0.265521	0.740548	-5.035
IGFBP3	IGFBP3	-0.218393	0.0301195	-0.917331	0.364123	0.806895	-5.2202
HLA-B	HLA-B	-0.218291	0.0105512	-0.956033	0.344439	0.793493	-5.18893
CRMP1	CRMP1	-0.218274	-0.457651	-1.00462	0.32074	0.78174	-5.14793
RAB31	RAB31	-0.218163	0.0821293	-1.26281	0.213513	0.701573	-4.89822
RECQL5	RECQL5	0.217802	0.0788761	2.25092	0.0295962	0.466783	-3.49091
TMEM256	TMEM256	0.217764	-0.115498	1.1775	0.245521	0.728393	-4.98659
MAP7D1	MAP7D1	-0.217707	-0.0681488	-1.90611	0.0633839	0.520361	-4.05723
SLC2A4	SLC2A4	-0.217633	-0.507366	-1.49534	0.142183	0.647394	-4.62893
VDAC3	VDAC3	0.217593	0.185727	1.41565	0.164134	0.662134	-4.72583
GNAI2	GNAI2	-0.217328	-0.161278	-1.68308	0.0996616	0.584504	-4.38232
ZFAND1	ZFAND1	0.217293	-0.0324416	1.96792	0.055596	0.507238	-3.96124
ACACA	ACACA	-0.217209	0.0433293	-1.74839	0.0875857	0.559972	-4.29064
RIOK3	RIOK3	-0.21711	-0.0140695	-1.67854	0.100549	0.58487	-4.38857
BCL2L15	BCL2L15	0.217077	-0.312093	1.10745	0.274302	0.745714	-5.05485
HLA-G	HLA-G	-0.21677	0.0813949	-0.74198	0.462163	0.852972	-5.34629
LTBP4	LTBP4	0.216699	-0.122076	1.45661	0.15254	0.656872	-4.67661
HSPB1	HSPB1	0.216537	-0.887227	0.836247	0.407673	0.828179	-5.2817
STOML2	STOML2	0.21648	0.164573	1.44917	0.154596	0.65692	-4.68564
SSR3	SSR3	-0.216476	0.139412	-1.09954	0.277696	0.74957	-5.06231
RALY	RALY	0.216439	0.192183	1.58453	0.120456	0.618014	-4.51495
RAB11A	RAB11A	0.216433	-0.0986427	1.20176	0.236081	0.721209	-4.96203
EBNA1BP2	EBNA1BP2	0.216405	0.27101	1.77074	0.0837444	0.553451	-4.25859
QTRT2	QTRT2	0.216342	0.0326366	1.73781	0.0894555	0.564413	-4.3057
EXOC5	EXOC5	0.216147	-0.028722	2.15392	0.0369373	0.470272	-3.65766
ZYX	ZYX	-0.216092	-0.32701	-1.27521	0.209132	0.697377	-4.8849
NES	NES	-0.216042	-0.272293	-1.83958	0.0727907	0.533608	-4.15773
MOB3A	MOB3A	-0.215887	-0.179102	-1.66407	0.103423	0.589089	-4.40843
STX4	STX4	0.215806	-0.0107341	1.96298	0.0561863	0.507238	-3.969
NKIRAS2	NKIRAS2	0.21579	0.0946341	1.79677	0.0794503	0.548117	-4.22083
CA12	CA12	0.215783	-0.789527	1.05624	0.296799	0.76507	-5.10227
PMM2	PMM2	0.215695	-0.000880488	1.1496	0.256707	0.735648	-5.01424
PYCR2	PYCR2	0.215545	0.384437	1.15667	0.253841	0.734633	-5.00729
NARFL	NARFL	-0.215458	-0.361439	-1.29274	0.203055	0.690151	-4.86587
DPY30	DPY30	0.215366	-0.00219024	0.866313	0.391162	0.820111	-5.25953
EBAG9	EBAG9	0.215199	0.104921	2.18009	0.0348132	0.467624	-3.61323
SRFBP1	SRFBP1	-0.215183	0.190415	-1.67183	0.101873	0.586284	-4.3978
POP4	POP4	0.214926	0.18813	2.22089	0.0317169	0.466783	-3.54314
FKBP11	FKBP11	-0.214895	0.125634	-1.16265	0.251431	0.731822	-5.00138
TNFSF13	TNFSF13	-0.214891	-0.0387458	-1.69925	0.0965493	0.577572	-4.35989
ABL1	ABL1	-0.214752	-0.253253	-2.00138	0.0517341	0.496418	-3.90822
LARP4	LARP4	-0.214701	0.177681	-1.57428	0.122805	0.622396	-4.52833
AK2	AK2	0.214654	0.12651	1.81178	0.07706	0.542049	-4.19886
RHEB	RHEB	0.21462	-0.0608417	1.22268	0.228157	0.715486	-4.94049
MCAM	MCAM	-0.214482	-0.845044	-1.21078	0.23264	0.718903	-4.95279
TBC1D23	TBC1D23	-0.214447	-0.116605	-2.30118	0.0263293	0.465739	-3.40234
SMC4	SMC4	-0.213986	0.21168	-1.35597	0.18224	0.67212	-4.79527
PON2	PON2	0.213897	0.181434	1.40292	0.167872	0.662134	-4.74086
BCL2L14	BCL2L14	0.213864	0.0942207	1.161	0.252096	0.73242	-5.00302
ABCC1	ABCC1	-0.213569	0.0833659	-2.03329	0.0482712	0.489647	-3.85702
SUCLA2	SUCLA2	0.213546	0.0363634	1.12665	0.266184	0.740734	-5.03653
ATP1B3	ATP1B3	0.213541	-0.065022	1.48563	0.144726	0.650349	-4.64099
ANLN	ANLN	0.213457	0.264589	1.60966	0.114845	0.60282	-4.48179
IER3IP1	IER3IP1	-0.213218	0.0975805	-1.57768	0.122021	0.622317	-4.5239
CRACR2A	CRACR2A	0.213165	-0.13075	1.08811	0.282652	0.75312	-5.07301
ATP12A	ATP12A	-0.21307	0.0750573	-1.5726	0.123196	0.622396	-4.53053
CNIH4	CNIH4	-0.212923	-0.275961	-2.52055	0.0155376	0.439224	-2.99904
MBOAT7	MBOAT7	0.212802	0.0274659	1.87936	0.067033	0.527539	-4.09799
MAP4K4	MAP4K4	-0.212784	-0.0943244	-1.38635	0.17284	0.66906	-4.76026
LSM1	LSM1	0.212766	-0.00708772	1.74607	0.0879927	0.561485	-4.29395
RAB27B	RAB27B	0.212729	-0.0527659	0.776842	0.441536	0.849523	-5.32327
SEC61B	SEC61B	-0.212684	0.122898	-2.03995	0.047574	0.48946	-3.84625
TFAM	TFAM	0.21265	0.135151	1.2714	0.210469	0.698855	-4.889
IL16	IL16	-0.212567	-0.275205	-1.30557	0.198693	0.685678	-4.85179
UGT8	UGT8	-0.212447	0.0275378	-0.940218	0.352396	0.797526	-5.20186
DEFA6	DEFA6	-0.212326	-2.23317	-0.345601	0.73134	0.948384	-5.53489
HK3	HK3	-0.212228	0.12882	-0.870684	0.388797	0.817582	-5.25624
RAP1GDS1	RAP1GDS1	-0.21207	-0.0580488	-2.57465	0.0135871	0.439224	-2.89559
COL4A1	COL4A1	-0.212047	-0.347522	-1.08728	0.283014	0.75312	-5.07378
GCHFR	GCHFR	-0.212023	-0.166238	-0.936312	0.35438	0.797747	-5.20502
OSTF1	OSTF1	-0.212007	-0.00869756	-2.46357	0.0178651	0.451368	-3.10634
FYB	FYB	-0.211859	-0.156581	-1.3248	0.192286	0.680798	-4.83045
TAMM41	TAMM41	0.211847	0.0866768	1.52909	0.13362	0.641307	-4.58649
RPS6KA5	RPS6KA5	0.211696	-0.288171	2.11611	0.0402072	0.476854	-3.72111
FBL	FBL	0.211577	0.281178	2.06038	0.0454909	0.484893	-3.81304
SEL1L	SEL1L	-0.211548	0.0937439	-2.02538	0.0491098	0.492052	-3.86977
TBC1D13	TBC1D13	-0.211372	-0.0205488	-2.25034	0.0296363	0.466783	-3.49193
USP16	USP16	-0.21127	-0.0347171	-1.65089	0.1061	0.594266	-4.42639
UTRN	UTRN	-0.211246	-0.12428	-2.05607	0.0459232	0.485283	-3.82006
BET1	BET1	0.211167	0.0257532	1.21971	0.229271	0.715578	-4.94357
MON1B	MON1B	-0.211104	-0.0424927	-2.55434	0.0142917	0.439224	-2.93462
TAF15	TAF15	-0.211067	0.0619463	-0.876887	0.385457	0.816818	-5.25156
LYRM4	LYRM4	0.211051	0.113236	1.46314	0.150755	0.655256	-4.66866
RBM22	RBM22	-0.21097	0.207193	-2.48053	0.0171413	0.451368	-3.07459
NGLY1	NGLY1	0.210928	-0.0710257	2.01013	0.0507639	0.495188	-3.89425
MCFD2	MCFD2	-0.210901	0.283261	-1.43264	0.159244	0.659568	-4.70556
RSL1D1	RSL1D1	0.210872	0.363195	1.64497	0.107321	0.594266	-4.43442
MCL1	MCL1	-0.210849	-0.0650931	-1.94574	0.0582903	0.507238	-3.99597
VPS26B	VPS26B	-0.210836	-0.0674623	-2.59831	0.0128068	0.439224	-2.84988
2024-09-06	2024-09-06	-0.210801	-0.537139	-1.57593	0.122426	0.622317	-4.52619
NTPCR	NTPCR	0.210758	0.0535951	1.62019	0.112556	0.600846	-4.46775
ITGA5	ITGA5	-0.210573	-0.944539	-0.824964	0.413979	0.831739	-5.28982
TRMT1	TRMT1	-0.210499	0.0717366	-1.16234	0.251557	0.731822	-5.00169
IDI1	IDI1	0.21042	-0.271241	0.90747	0.369253	0.809144	-5.22797
ABCD3	ABCD3	-0.210394	0.0230659	-1.61692	0.113264	0.60282	-4.47212
AHSP	AHSP	0.210392	-1.08697	0.538438	0.593072	0.907681	-5.46005
ARHGDIA	ARHGDIA	0.210292	-0.426463	0.640352	0.525366	0.878593	-5.40751
DPP4	DPP4	-0.210273	-0.234817	-0.719628	0.475676	0.858919	-5.36051
GALNT1	GALNT1	-0.210069	0.0318122	-1.32178	0.193283	0.68124	-4.83383
TMA16	TMA16	-0.209984	0.0937341	-1.91074	0.0627696	0.519641	-4.05012
PFKP	PFKP	-0.209859	-0.138885	-1.48243	0.145571	0.651613	-4.64495
SCYL1	SCYL1	-0.20971	0.0839537	-2.19962	0.0332991	0.466783	-3.5798
SLC35A1	SLC35A1	-0.20917	-0.122082	-1.25243	0.217231	0.70614	-4.90927
C1S	C1S	-0.209072	-0.130144	-1.3699	0.177882	0.671674	-4.7793
C1R	C1R	-0.208925	-0.121715	-1.43633	0.158199	0.658955	-4.70114
CAPN15	CAPN15	0.208877	0.0202011	1.95207	0.0575096	0.507238	-3.98608
CD46	CD46	0.208676	0.209776	1.21978	0.229244	0.715578	-4.9435
CBX3	CBX3	0.208625	0.139271	1.20214	0.235937	0.721209	-4.96165
SPG21	SPG21	-0.208578	0.101893	-1.90628	0.0633615	0.520361	-4.05697
RALGAPA2	RALGAPA2	0.208399	0.0675805	1.54613	0.129456	0.635818	-4.56473
CCDC58	CCDC58	0.208396	0.143983	1.62597	0.111318	0.599613	-4.46002
SERPINA5	SERPINA5	-0.208319	-0.238632	-1.10718	0.274416	0.745714	-5.0551
MED4	MED4	-0.208193	-0.181971	-2.09059	0.0425564	0.480751	-3.76345
PLEKHA1	PLEKHA1	0.208181	-0.00538293	1.5935	0.118426	0.611892	-4.50315
ELMSAN1	ELMSAN1	0.20814	-0.0659534	1.51998	0.13589	0.644109	-4.59803
MCM4	MCM4	-0.208037	0.160593	-1.11571	0.270789	0.743324	-5.04701
SLC9A3R2	SLC9A3R2	0.208031	0.00943415	1.9138	0.062367	0.519641	-4.04542
MMRN1	MMRN1	-0.208002	-0.173701	-1.30742	0.198067	0.685184	-4.84974
FAM208A	FAM208A	-0.207986	0.061197	-1.84265	0.0723331	0.533608	-4.15317
AP1M2	AP1M2	0.207877	0.0699659	1.79286	0.0800839	0.548117	-4.22654
TMEM238	TMEM238	0.207685	-0.154173	1.96199	0.0563057	0.507238	-3.97055
LRPPRC	LRPPRC	0.207627	0.175505	1.5014	0.140614	0.647319	-4.62137
VPS39	VPS39	-0.207568	-0.0419418	-2.07453	0.0440946	0.480751	-3.78988
ACAD9	ACAD9	0.207557	0.113449	2.00161	0.0517092	0.496418	-3.90787
STAT5A	STAT5A	-0.207492	-0.0799659	-1.75757	0.0859906	0.556241	-4.27752
STMN1	STMN1	0.207473	-0.0922634	0.862571	0.393194	0.820459	-5.26233
ELMO1	ELMO1	-0.207346	-0.192524	-1.45558	0.152824	0.656872	-4.67787
EXOC6	EXOC6	0.207311	-0.00372629	1.22003	0.229151	0.715578	-4.94324
HSPB6	HSPB6	0.207263	-1.63472	0.579351	0.565398	0.896092	-5.44003
RAPGEF1	RAPGEF1	-0.20726	-0.0831024	-2.17666	0.035085	0.467912	-3.61907
PPP2R1B	PPP2R1B	-0.207192	0.044522	-1.60682	0.115467	0.604164	-4.48555
NADK	NADK	-0.206786	0.0350049	-1.86938	0.0684396	0.528352	-4.11307
ANKRD13A	ANKRD13A	-0.206774	-0.165071	-2.23031	0.0310376	0.466783	-3.52682
MRPL37	MRPL37	0.206765	0.137278	1.59919	0.117154	0.608356	-4.49565
KIF13B	KIF13B	0.206677	-0.171754	2.01172	0.0505895	0.495188	-3.89171
MAN2B1	MAN2B1	0.206597	-0.199846	1.03099	0.308353	0.772845	-5.12488
LIN7C	LIN7C	0.206583	0.0456537	2.20355	0.0330016	0.466783	-3.57305
RBFOX2	RBFOX2	0.206527	-0.113416	1.72903	0.0910302	0.565706	-4.31812
SRGAP2	SRGAP2	-0.206348	-0.0184556	-1.09201	0.280952	0.75312	-5.06937
EPHB3	EPHB3	-0.206319	0.0356539	-0.904993	0.370549	0.810637	-5.22991
FMOD	FMOD	0.20629	0.0204268	0.93392	0.355599	0.798856	-5.20695
PIP4K2B	PIP4K2B	-0.20616	-0.153217	-2.15298	0.0370159	0.470272	-3.65925
HDAC4	HDAC4	0.206136	-0.122275	1.61154	0.114433	0.60282	-4.47928
C9orf142	C9orf142	0.205963	0.0178927	2.20386	0.0329779	0.466783	-3.57251
S100A4	S100A4	0.205942	-0.185868	0.711602	0.480583	0.862175	-5.36551
CA2	CA2	0.205851	-1.341	0.701602	0.486735	0.865161	-5.37166
RPRD1A	RPRD1A	-0.205766	0.0908537	-1.55485	0.127367	0.630432	-4.55353
FUS	FUS	0.205754	0.297956	1.65119	0.106038	0.594266	-4.42598
CHD1L	CHD1L	0.205712	0.131167	1.64702	0.106897	0.594266	-4.43164
ADH5	ADH5	-0.205705	-0.467783	-1.94065	0.0589243	0.507895	-4.0039
ADAM9	ADAM9	0.20547	0.152744	1.72856	0.0911158	0.565706	-4.31879
DHX8	DHX8	-0.205386	0.124496	-1.83955	0.0727951	0.533608	-4.15777
MPV17	MPV17	0.204999	-0.0165878	1.42677	0.16092	0.661221	-4.71259
MB	MB	0.20484	-0.460098	0.794561	0.431265	0.844836	-5.31118
MVD	MVD	-0.204747	-0.129198	-1.57645	0.122305	0.622317	-4.5255
ARL6	ARL6	-0.204668	-0.312812	-2.03109	0.0485029	0.489647	-3.86057
RSU1	RSU1	-0.204423	-0.695339	-1.23817	0.22242	0.710484	-4.92432
TGFB1I1	TGFB1I1	-0.204393	-0.911807	-0.993909	0.325868	0.786301	-5.15714
TNIK	TNIK	0.204254	-0.0389885	1.02433	0.311451	0.774754	-5.13076
AQP1	AQP1	-0.204218	-0.736166	-0.990325	0.327596	0.786301	-5.1602
SERPINB1	SERPINB1	-0.204064	0.16608	-1.10735	0.274343	0.745714	-5.05494
ANTXR2	ANTXR2	-0.203992	-0.328454	-1.39699	0.169637	0.66386	-4.74783
EVA1B	EVA1B	-0.203922	-0.233748	-1.77094	0.0837109	0.553451	-4.2583
DNAJC7	DNAJC7	-0.203859	0.144232	-1.94514	0.0583636	0.507238	-3.99689
MORF4L2	MORF4L2	0.203811	0.045861	1.80783	0.0776821	0.542377	-4.20465
PIGO	PIGO	0.203752	0.0930073	1.8755	0.0675746	0.527539	-4.10383
HSCB	HSCB	0.203704	-0.0292054	2.02435	0.0492201	0.492052	-3.87143
PPP1R1B	PPP1R1B	0.203691	-0.176434	1.11033	0.273073	0.744807	-5.05212
HMCN2	HMCN2	-0.203654	-0.539495	-1.13116	0.264305	0.740548	-5.03219
TRIM3	TRIM3	-0.203632	-0.214512	-1.7941	0.0798824	0.548117	-4.22473
PPFIBP1	PPFIBP1	-0.20345	0.0840902	-1.85343	0.0707402	0.531566	-4.13705
FABP4	FABP4	-0.203406	-1.51324	-0.407349	0.685787	0.933418	-5.51445
VSIR	VSIR	-0.203405	-0.121969	-1.53271	0.132727	0.640608	-4.58188
HID1	HID1	0.20339	0.0419902	0.887301	0.379889	0.814388	-5.24361
EXOSC2	EXOSC2	-0.203186	0.0317226	-1.29115	0.203599	0.690151	-4.8676
SEC31A	SEC31A	-0.203094	0.118312	-2.93526	0.00534749	0.383716	-2.16915
ITGA2B	ITGA2B	-0.20307	-0.0661344	-0.915028	0.365317	0.806895	-5.22202
MCM2	MCM2	-0.202983	0.168315	-1.13688	0.261931	0.739111	-5.02665
LCN2	LCN2	-0.202964	-0.152256	-0.581144	0.5642	0.895454	-5.43912
RANBP1	RANBP1	0.202842	-0.151205	0.759567	0.451688	0.85097	-5.3348
TRMT61B	TRMT61B	0.202716	-0.145148	1.53774	0.131492	0.639749	-4.57547
RCC1	RCC1	0.202577	0.259446	2.24631	0.0299135	0.466783	-3.49897
PLD1	PLD1	-0.20257	-0.128002	-1.26522	0.212656	0.700606	-4.89564
P4HB	P4HB	-0.202471	0.180193	-1.71125	0.0942938	0.572965	-4.34314
SLC31A1	SLC31A1	-0.202385	-0.0151506	-1.72481	0.091796	0.566402	-4.32408
VIP	VIP	0.202216	-1.05582	1.10942	0.273462	0.744807	-5.05299
PEX5	PEX5	-0.202045	-0.162436	-2.63751	0.0116035	0.434922	-2.77349
CD47	CD47	0.202044	0.0151073	2.33872	0.0241031	0.46365	-3.33522
RASAL1	RASAL1	0.202015	0.0557907	1.1492	0.256871	0.735648	-5.01463
RCC1L	RCC1L	0.202	0.0727634	1.3632	0.179969	0.672054	-4.787
RP2	RP2	-0.202	0.0597585	-2.22844	0.0311717	0.466783	-3.53007
AFDN	AFDN	0.201951	0.0901463	2.10335	0.0413668	0.477115	-3.74233
TRAPPC11	TRAPPC11	-0.201769	-0.0539439	-1.93614	0.05949	0.509759	-4.01089
KYAT3	KYAT3	0.201756	-0.0658017	1.27849	0.207986	0.696595	-4.88136
PRKAR2B	PRKAR2B	-0.201672	-0.506376	-1.40571	0.167047	0.662134	-4.73757
CTBP1	CTBP1	-0.20163	-0.151163	-1.40333	0.16775	0.662134	-4.74037
NFU1	NFU1	0.201618	0.0269732	1.49765	0.141583	0.647319	-4.62606
NHEJ1	NHEJ1	0.201612	-0.0337	1.62985	0.110492	0.599613	-4.45481
CDC27	CDC27	-0.201554	0.0761659	-2.23787	0.0305016	0.466783	-3.51367
FDXR	FDXR	0.201376	0.131995	1.62959	0.110547	0.599613	-4.45516
LOXL2	LOXL2	-0.201376	0.134627	-1.03864	0.304819	0.769166	-5.11808
GANAB	GANAB	-0.201317	0.0946585	-2.9301	0.0054218	0.383716	-2.17998
MCEE	MCEE	0.201304	-0.174071	1.28944	0.20419	0.690894	-4.86947
BAX	BAX	0.201126	0.0792902	2.10508	0.0412081	0.477115	-3.73946
IFRD1	IFRD1	-0.201122	-0.480249	-0.444163	0.659168	0.929315	-5.50068
TMEM147	TMEM147	-0.201013	0.131852	-1.79965	0.0789874	0.547701	-4.21663
HSPA2	HSPA2	-0.200986	-0.947244	-0.871187	0.388526	0.817582	-5.25587
DOCK7	DOCK7	-0.20095	0.0332171	-3.13315	0.00312231	0.351755	-1.74574
SEC61A1	SEC61A1	-0.20093	0.198512	-1.85051	0.0711694	0.532209	-4.14143
CHCHD2	CHCHD2	0.20092	0.241773	1.21651	0.230473	0.717034	-4.94688
VCL	VCL	-0.200825	-0.78448	-1.07767	0.287234	0.755349	-5.08269
C10orf11	C10orf11	-0.200776	-0.217557	-1.17905	0.244907	0.728056	-4.98503
CORO1C	CORO1C	-0.200712	-0.508802	-1.28348	0.206249	0.694656	-4.87595
RAB5C	RAB5C	-0.200564	0.0369707	-1.98394	0.053717	0.507045	-3.93594
RAB2A	RAB2A	0.200548	0.15912	1.85809	0.0700613	0.529707	-4.13006
NBN	NBN	0.200379	0.0886512	1.84958	0.0713054	0.532209	-4.14281
RPRD1B	RPRD1B	0.200288	0.1892	1.50936	0.138575	0.645747	-4.61141
RAB3B	RAB3B	-0.200195	-0.340094	-0.954656	0.345127	0.793493	-5.19006
PROCR	PROCR	-0.200175	-0.317888	-1.26593	0.212403	0.700606	-4.89487
CCDC22	CCDC22	-0.19993	-0.0662463	-2.35986	0.0229253	0.45588	-3.29707
SLAIN2	SLAIN2	-0.199905	-0.133866	-1.6638	0.103479	0.589089	-4.40881
DNAJC15	DNAJC15	-0.199834	0.100766	-1.13382	0.263199	0.740233	-5.02961
VARS2	VARS2	0.199528	0.130593	1.40445	0.16742	0.662134	-4.73906
LTBP3	LTBP3	-0.198857	0.299739	-0.984019	0.330651	0.788733	-5.16555
PPME1	PPME1	-0.198736	0.00452195	-2.23222	0.0309017	0.466783	-3.5235
FEZ2	FEZ2	-0.19865	-0.108245	-2.3013	0.0263219	0.465739	-3.40213
RABEP1	RABEP1	-0.19856	-0.0619488	-2.03772	0.0478066	0.48946	-3.84986
PTK2	PTK2	0.198514	0.0732732	2.49751	0.0164434	0.444647	-3.04265
LPGAT1	LPGAT1	-0.198378	0.157154	-1.33509	0.188924	0.678934	-4.81892
TOMM7	TOMM7	-0.198351	0.222966	-1.32685	0.191613	0.680798	-4.82816
MCRIP2	MCRIP2	-0.198348	0.0109213	-0.842967	0.403946	0.824754	-5.27681
DENND3	DENND3	-0.198325	-0.0120585	-1.64616	0.107075	0.594266	-4.43281
LSM8	LSM8	0.19809	0.0509488	2.15954	0.0364711	0.470272	-3.64814
SERPINA4	SERPINA4	-0.197999	-0.18182	-1.02594	0.310701	0.774754	-5.12934
CEBPZ	CEBPZ	0.197994	0.236468	1.73473	0.0900049	0.565437	-4.31006
FNBP1	FNBP1	-0.197582	-0.469234	-1.35995	0.180985	0.672054	-4.79071
NOC2L	NOC2L	0.19752	0.259949	1.92829	0.0604871	0.512316	-4.02306
PARP9	PARP9	-0.197475	0.0635268	-1.69562	0.0972404	0.578011	-4.36494
GRWD1	GRWD1	0.197437	0.170559	1.43447	0.158724	0.658955	-4.70337
PNPT1	PNPT1	0.197272	0.213632	1.4144	0.164497	0.662134	-4.7273
PIR	PIR	-0.197248	-0.137495	-1.03061	0.308529	0.772845	-5.12522
PPP6R2	PPP6R2	-0.197102	-0.103398	-1.86676	0.0688132	0.528352	-4.11702
CTSL	CTSL	-0.197092	-0.329839	-0.962184	0.341377	0.792674	-5.18385
FARP2	FARP2	0.19709	0.00662927	1.80457	0.0782004	0.54395	-4.20943
SERF2	SERF2	-0.197065	0.0674727	-1.48056	0.146067	0.652454	-4.64726
COPS7A	COPS7A	-0.197062	-0.102451	-1.84386	0.0721515	0.533608	-4.15135
OCLN	OCLN	0.196912	-0.00658781	1.4765	0.14715	0.652454	-4.65227
PDGFRB	PDGFRB	-0.196658	0.021378	-1.42603	0.161134	0.661221	-4.71348
RCL1	RCL1	0.196645	0.299032	2.06502	0.045029	0.482307	-3.80546
ACSL3	ACSL3	-0.196615	0.134078	-1.54757	0.129108	0.63524	-4.56288
RETREG2	RETREG2	0.196612	-0.0719976	1.71169	0.094211	0.572965	-4.34252
SORL1	SORL1	0.196594	-0.116517	1.6921	0.0979162	0.579384	-4.36984
HTT	HTT	-0.196543	0.015522	-2.78374	0.00797502	0.415559	-2.48188
SLC25A5	SLC25A5	0.196442	0.0550902	1.36885	0.178208	0.671674	-4.78051
GOT2	GOT2	0.196266	0.129539	1.19219	0.239771	0.723369	-4.97177
ARRB2	ARRB2	-0.196168	-0.0421268	-1.24439	0.220146	0.707425	-4.91778
TUBAL3	TUBAL3	-0.195878	-0.0863976	-1.29744	0.201449	0.688206	-4.86073
EEF1B2	EEF1B2	-0.195588	0.253632	-2.29923	0.0264497	0.465828	-3.40581
ACO1	ACO1	-0.195538	-0.121207	-2.07162	0.0443793	0.480751	-3.79466
TMTC3	TMTC3	-0.195518	0.046822	-1.73034	0.0907945	0.565706	-4.31628
POLB	POLB	0.195494	0.132241	1.45881	0.151938	0.656872	-4.67394
MINDY1	MINDY1	0.195433	-0.213382	1.3764	0.175877	0.671057	-4.7718
DCTPP1	DCTPP1	0.195327	-0.0501171	1.08438	0.284283	0.75312	-5.07648
MXRA7	MXRA7	-0.195239	-0.646807	-0.898527	0.373945	0.814019	-5.23495
MSR1	MSR1	-0.195204	0.10376	-0.959192	0.342864	0.792674	-5.18632
PGLYRP1	PGLYRP1	-0.195185	0.0467766	-0.837548	0.40695	0.827444	-5.28075
FAM91A1	FAM91A1	0.195047	0.15309	2.4568	0.0181615	0.451368	-3.11897
TP53RK	TP53RK	0.194938	0.0157537	1.71065	0.0944045	0.573027	-4.34397
TCEA1	TCEA1	0.194827	0.114373	1.62401	0.111737	0.599613	-4.46265
MEP1A	MEP1A	-0.19472	-0.61589	-0.893791	0.376445	0.814089	-5.23861
NUDT19	NUDT19	0.194681	0.11091	1.16392	0.250922	0.731587	-5.00012
PTK6	PTK6	0.194677	-0.171597	1.38964	0.171845	0.66806	-4.75642
PCP4	PCP4	0.194615	-0.522752	0.608776	0.545899	0.888106	-5.42474
SMAP2	SMAP2	-0.194593	-0.0941561	-1.36284	0.180081	0.672054	-4.78741
LMF2	LMF2	-0.19414	0.135368	-1.57595	0.122422	0.622317	-4.52616
ITPA	ITPA	0.193938	-0.102322	1.02445	0.311394	0.774754	-5.13065
SIRT2	SIRT2	0.193816	-0.304827	1.14105	0.260211	0.737003	-5.02259
CHMP4A	CHMP4A	0.193815	-0.0847366	1.42178	0.162357	0.662072	-4.71854
EPB41L5	EPB41L5	0.193729	-0.0921585	1.32372	0.192642	0.680798	-4.83166
NPNT	NPNT	0.193718	-0.260617	0.870692	0.388793	0.817582	-5.25624
ACOT8	ACOT8	0.193703	0.0610171	1.16831	0.249167	0.730291	-4.99577
NOLC1	NOLC1	0.193625	0.33	1.41362	0.164726	0.662134	-4.72823
PICALM	PICALM	-0.193546	0.0596049	-2.64946	0.011258	0.434922	-2.75006
HDHD2	HDHD2	0.193463	-0.408273	1.16875	0.248992	0.730291	-4.99533
RAB23	RAB23	-0.193453	-0.53449	-0.940431	0.352288	0.797526	-5.20168
SLC9A3R1	SLC9A3R1	0.193322	-0.303607	1.04776	0.300644	0.768063	-5.10992
PSMB8	PSMB8	-0.193161	0.106627	-1.5024	0.140356	0.647319	-4.62012
GCLM	GCLM	-0.193158	-0.0592756	-2.24755	0.0298281	0.466783	-3.49681
LAMP1	LAMP1	0.192973	0.165176	1.38617	0.172893	0.66906	-4.76046
TRIM29	TRIM29	0.192951	0.116993	0.477059	0.635753	0.921886	-5.48737
GNG7	GNG7	-0.192903	-0.653936	-1.37895	0.175093	0.671057	-4.76884
VAMP8	VAMP8	0.192832	0.15712	1.86206	0.0694887	0.528416	-4.12411
PTN	PTN	-0.192805	-1.03341	-1.18136	0.243998	0.727957	-4.98271
MFGE8	MFGE8	-0.192708	0.00921707	-0.96518	0.339891	0.792674	-5.18136
APEX1	APEX1	0.192682	0.143837	1.89605	0.0647359	0.52344	-4.07261
RPF2	RPF2	0.192664	0.354917	1.3496	0.184258	0.673536	-4.80251
NIPSNAP3A	NIPSNAP3A	0.192441	-0.0893315	0.938518	0.353259	0.797526	-5.20323
RCSD1	RCSD1	-0.192413	-0.407068	-0.977913	0.333627	0.789641	-5.17071
TDRKH	TDRKH	0.192367	0.0612857	1.44816	0.154878	0.65692	-4.68687
PMPCB	PMPCB	0.192287	0.133578	1.50088	0.140749	0.647319	-4.62203
SYPL1	SYPL1	0.192085	-0.0850537	1.75062	0.0871953	0.558708	-4.28745
SET	SET	0.192041	0.0333366	1.04103	0.303724	0.769166	-5.11595
BMS1	BMS1	0.191983	0.247049	2.32138	0.0251095	0.464715	-3.36632
RNF170	RNF170	0.191948	0.0276317	1.26677	0.212106	0.700606	-4.89398
CNOT7	CNOT7	-0.191923	0.0276106	-1.17342	0.247133	0.729212	-4.99067
DYSF	DYSF	-0.191908	-0.302207	-1.53696	0.131683	0.639749	-4.57646
OLA1	OLA1	0.191824	-0.0906829	1.04417	0.302284	0.768816	-5.11314
BRIX1	BRIX1	0.191746	0.237778	1.76945	0.0839627	0.553451	-4.26045
NOP56	NOP56	0.19174	0.293305	1.81219	0.0769951	0.542049	-4.19825
CAPN2	CAPN2	0.191693	-0.0972366	1.82926	0.0743514	0.536143	-4.17305
CHTOP	CHTOP	0.191656	0.146193	1.56045	0.126038	0.627322	-4.54629
NCSTN	NCSTN	0.19159	0.117744	1.54154	0.130567	0.637664	-4.57061
BOLA2	BOLA2	0.191461	0.123956	1.28746	0.20487	0.691552	-4.87162
FAM129B	FAM129B	0.191391	0.0646439	2.45703	0.0181511	0.451368	-3.11853
SMPDL3B	SMPDL3B	0.191373	0.118678	0.928669	0.358283	0.801882	-5.21117
LRRC57	LRRC57	0.191316	-0.0186195	1.90517	0.0635084	0.520361	-4.05866
FHL2	FHL2	-0.191183	0.271983	-1.51684	0.13668	0.644383	-4.60199
HLCS	HLCS	-0.191147	0.116777	-1.72927	0.0909869	0.565706	-4.31778
DOCK11	DOCK11	-0.190995	-0.0480415	-1.36552	0.179244	0.671674	-4.78434
SLC22A18	SLC22A18	0.190817	0.0305366	1.07304	0.28928	0.757409	-5.08694
DIEXF	DIEXF	0.190795	0.185237	1.56726	0.124439	0.62459	-4.53747
MAN1A2	MAN1A2	-0.19078	0.10604	-1.44984	0.15441	0.65692	-4.68483
CKMT2	CKMT2	-0.190738	-0.206614	-0.557889	0.579834	0.901137	-5.45071
ANKRD44	ANKRD44	-0.190611	-0.221663	-1.38231	0.174067	0.671057	-4.76495
ACAD10	ACAD10	0.190576	-0.137276	1.78688	0.081059	0.548252	-4.23523
SDC4	SDC4	0.190572	-0.155139	1.12082	0.268633	0.741989	-5.04213
RAPH1	RAPH1	0.190474	-0.0704573	1.76332	0.0850034	0.55508	-4.26927
GLRX5	GLRX5	0.190418	0.00863659	1.64528	0.107258	0.594266	-4.43401
PF4	PF4	-0.190417	-0.285213	-0.889614	0.378659	0.814388	-5.24183
CHPF2	CHPF2	-0.190357	-0.0619346	-1.44157	0.15672	0.658647	-4.69483
SYN2	SYN2	0.190286	-1.34969	0.620846	0.538002	0.883909	-5.41826
HP	HP	-0.190202	-1.06328	-0.54611	0.587833	0.904959	-5.45641
ADSS	ADSS	0.190098	-0.119124	0.991431	0.327062	0.786301	-5.15925
C4A	C4A	-0.189787	-0.412673	-0.776684	0.441628	0.849523	-5.32338
AGO3	AGO3	-0.189739	-0.1742	-1.84983	0.0712685	0.532209	-4.14244
EXOC1	EXOC1	0.189686	0.0162854	2.19974	0.0332896	0.466783	-3.57959
ITPR1	ITPR1	-0.189627	-0.395554	-1.48609	0.144605	0.650349	-4.64042
OXA1L	OXA1L	0.189596	0.139356	1.59876	0.11725	0.608356	-4.49621
ZNF384	ZNF384	0.189539	-0.0459453	1.44382	0.156089	0.658066	-4.69211
MPP7	MPP7	0.189492	-0.244685	1.27066	0.210732	0.699025	-4.8898
IFIT2	IFIT2	-0.189423	-0.131755	-1.25383	0.216726	0.70614	-4.90778
MRPL15	MRPL15	0.18941	0.14579	1.14657	0.257946	0.735648	-5.01721
ARHGAP1	ARHGAP1	-0.189401	0.0577805	-2.15183	0.0371114	0.470272	-3.66119
LTBP2	LTBP2	-0.189269	0.389278	-0.774327	0.443005	0.849791	-5.32497
RALB	RALB	0.189214	-0.0635122	1.82662	0.0747551	0.538191	-4.17696
LGALS1	LGALS1	-0.189129	-0.915832	-0.542024	0.590621	0.906527	-5.45835
TDRD3	TDRD3	0.189032	-0.0264946	2.15511	0.0368377	0.470272	-3.65564
SPATS2	SPATS2	-0.189009	0.0931103	-1.43764	0.157827	0.658955	-4.69956
GAB1	GAB1	-0.189002	-0.543205	-1.21616	0.230607	0.717034	-4.94725
LEPROT	LEPROT	-0.18892	-0.16574	-1.27714	0.208457	0.697109	-4.88282
TFE3	TFE3	-0.188908	-0.0715005	-1.52037	0.135792	0.644108	-4.59753
RAB11B	RAB11B	0.188904	-0.0565927	2.03792	0.0477861	0.48946	-3.84954
PPFIBP2	PPFIBP2	0.18879	0.0158924	1.7977	0.0793008	0.548117	-4.21948
MMP1	MMP1	-0.188675	-0.100051	-0.600335	0.551457	0.888672	-5.4292
SMC2	SMC2	-0.188531	0.209346	-1.15381	0.254996	0.735648	-5.0101
CILP	CILP	-0.18848	-0.425505	-0.599178	0.552221	0.888672	-5.42981
UBE2D2	UBE2D2	-0.188437	-0.167748	-1.15096	0.256156	0.735648	-5.01291
MCM6	MCM6	-0.188426	0.159498	-1.01345	0.316554	0.775783	-5.14027
PTDSS1	PTDSS1	0.188257	0.159912	1.34119	0.186952	0.675154	-4.81204
GTF2H1	GTF2H1	-0.188198	0.0220646	-1.9757	0.0546758	0.507238	-3.94896
CA3	CA3	-0.188178	-0.188443	-1.14677	0.257864	0.735648	-5.01701
MYDGF	MYDGF	0.188175	-0.227646	0.564081	0.575651	0.897644	-5.44767
FRZB	FRZB	-0.188095	-0.109223	-1.05218	0.298639	0.766104	-5.10595
TAGLN3	TAGLN3	0.188091	-0.455959	0.999798	0.323042	0.784726	-5.15209
SPINT1	SPINT1	0.188036	-0.0330268	1.6292	0.110629	0.599613	-4.45568
IRF2	IRF2	-0.188014	-0.0409881	-1.56366	0.125282	0.627048	-4.54214
PPID	PPID	-0.187795	0.275861	-2.37831	0.0219405	0.45588	-3.26359
IMMT	IMMT	0.18766	0.065978	1.81572	0.0764425	0.540768	-4.19306
EARS2	EARS2	-0.187659	-0.0133902	-1.32399	0.192551	0.680798	-4.83135
NXN	NXN	-0.187607	-0.30202	-1.2531	0.216989	0.70614	-4.90856
BLOC1S3	BLOC1S3	0.187605	-0.17627	1.7649	0.0847349	0.55508	-4.267
TNC	TNC	-0.187603	0.0232	-0.66204	0.511504	0.874454	-5.39518
LRPAP1	LRPAP1	-0.187599	0.202085	-1.71118	0.0943074	0.572965	-4.34324
RPL36	RPL36	0.187489	0.000334146	0.879657	0.383971	0.816818	-5.24945
MUC1	MUC1	0.187456	-0.294307	0.550544	0.584816	0.90432	-5.45428
ITGA3	ITGA3	0.187453	-0.380883	1.37609	0.175972	0.671057	-4.77216
SUCLG1	SUCLG1	0.187307	-0.212424	1.19962	0.236904	0.721982	-4.96422
VWA5A	VWA5A	-0.187223	-0.30532	-1.49806	0.141477	0.647319	-4.62555
FKBP2	FKBP2	-0.186906	-0.133022	-1.5074	0.139073	0.645747	-4.61386
TAPBPL	TAPBPL	-0.186821	-0.048322	-1.17136	0.24795	0.729275	-4.99272
OSGEPL1	OSGEPL1	0.18682	-0.0998284	1.20491	0.234875	0.72032	-4.95881
CMC1	CMC1	-0.186721	0.0674	-1.09898	0.277937	0.74957	-5.06284
ACSF3	ACSF3	0.186659	-0.0200293	1.35365	0.182974	0.673044	-4.79791
TTYH3	TTYH3	0.18656	0.177519	1.33778	0.188052	0.676528	-4.81589
ATP6V0A2	ATP6V0A2	-0.186538	0.0433695	-2.13432	0.0386018	0.475996	-3.69066
RIN3	RIN3	-0.186476	-0.0968053	-1.31467	0.19564	0.683985	-4.84173
FAS	FAS	-0.186476	-0.276902	-1.30363	0.199348	0.685936	-4.85393
POR	POR	0.186365	0.175122	1.63628	0.109134	0.597565	-4.44616
EFNA5	EFNA5	-0.18633	-0.491086	-1.14384	0.259065	0.736578	-5.01988
TMUB1	TMUB1	0.186249	-0.0565366	1.77872	0.0824082	0.550891	-4.24707
LOX	LOX	-0.186222	-0.0922915	-0.92117	0.362139	0.805187	-5.21715
TEFM	TEFM	-0.186221	0.216616	-1.40279	0.167912	0.662134	-4.74102
PCDH7	PCDH7	-0.186168	-0.411309	-1.11908	0.269362	0.742457	-5.04378
PDIA3	PDIA3	-0.186147	0.0371634	-1.56137	0.12582	0.627322	-4.54509
COTL1	COTL1	-0.186135	-0.136168	-1.24512	0.219881	0.707425	-4.91701
PRKACB	PRKACB	0.186079	-0.481788	1.19681	0.237986	0.723369	-4.96708
ARSE	ARSE	-0.186055	-0.257676	-0.657905	0.514132	0.875333	-5.39757
MAPKAPK2	MAPKAPK2	-0.185984	0.0625805	-2.8455	0.00678512	0.406581	-2.35567
STT3A	STT3A	-0.185899	0.20298	-1.93224	0.059984	0.511337	-4.01695
AFTPH	AFTPH	0.185841	-0.0118463	2.41563	0.0200631	0.451368	-3.19525
FAP	FAP	-0.185652	0.349588	-0.645351	0.522154	0.87726	-5.40471
TAGLN	TAGLN	-0.185476	-1.81068	-0.448507	0.656056	0.926907	-5.49897
C21orf59	C21orf59	-0.185398	0.0676445	-1.30331	0.199456	0.685936	-4.85428
FCGBP	FCGBP	0.18526	-1.27993	0.604971	0.548401	0.888672	-5.42676
CDS2	CDS2	-0.184978	-0.172849	-1.35905	0.181269	0.672054	-4.79175
ACLY	ACLY	-0.184963	0.223117	-1.46044	0.151491	0.656727	-4.67195
FAM210B	FAM210B	0.184919	-0.109483	0.921438	0.362001	0.805187	-5.21694
EP300	EP300	0.184909	-0.00864463	2.35409	0.0232415	0.45588	-3.30751
SFSWAP	SFSWAP	0.184898	0.189884	1.60512	0.115841	0.605639	-4.4878
TIMM29	TIMM29	0.184814	0.0504402	2.28711	0.0272093	0.466783	-3.42727
PTPRK	PTPRK	0.184735	0.0281278	1.45696	0.152445	0.656872	-4.67619
MICU2	MICU2	0.184715	0.0030878	2.08318	0.0432597	0.480751	-3.77566
ABCB6	ABCB6	-0.184564	-0.0359215	-1.64099	0.108149	0.595634	-4.43981
SULT1A1	SULT1A1	0.184486	-0.567226	0.91509	0.365285	0.806895	-5.22197
CD44	CD44	-0.184455	-0.100846	-1.43471	0.158655	0.658955	-4.70308
F3	F3	-0.184329	-0.0752724	-0.98352	0.330894	0.789027	-5.16597
HOMER3	HOMER3	-0.184322	0.00105769	-1.24491	0.219958	0.707425	-4.91723
DDX17	DDX17	0.184284	0.234124	2.48735	0.0168575	0.451368	-3.06176
GLMN	GLMN	0.184137	0.05009	1.98822	0.0532249	0.503842	-3.92917
H6PD	H6PD	0.184037	0.085861	1.66381	0.103476	0.589089	-4.40879
EXOC3	EXOC3	0.183727	-0.00904146	2.07843	0.0437173	0.480751	-3.78349
RDH14	RDH14	0.183698	-0.0230293	1.94922	0.0578603	0.507238	-3.99054
PPM1H	PPM1H	0.183581	-0.0382083	0.803415	0.426186	0.841909	-5.30504
SELENOS	SELENOS	-0.183498	0.0271293	-1.67686	0.10088	0.584914	-4.39089
VWA1	VWA1	-0.18349	-0.541544	-0.927926	0.358664	0.801951	-5.21176
TNFAIP8L3	TNFAIP8L3	0.183472	-0.00617499	1.14305	0.25939	0.736578	-5.02065
ZADH2	ZADH2	0.183348	-0.218334	1.43624	0.158224	0.658955	-4.70125
SLFN5	SLFN5	-0.183331	0.0520878	-1.20314	0.235555	0.721209	-4.96063
SHROOM2	SHROOM2	-0.1833	-0.188727	-1.1096	0.273382	0.744807	-5.05281
GK2	GK2	-0.183274	0.152397	-1.96555	0.0558778	0.507238	-3.96495
PEX16	PEX16	-0.183134	0.161001	-1.64367	0.107592	0.594266	-4.43619
DNAJB4	DNAJB4	-0.182977	-0.596822	-1.07346	0.289095	0.757224	-5.08656
TOMM40	TOMM40	0.182943	0.225893	1.72114	0.0924671	0.568591	-4.32925
LAMB1	LAMB1	-0.182922	-0.267054	-1.5991	0.117174	0.608356	-4.49577
AARS	AARS	-0.182839	0.106693	-1.69767	0.0968512	0.577572	-4.3621
LPCAT2	LPCAT2	0.182794	0.221476	1.02434	0.311444	0.774754	-5.13074
C19orf70	C19orf70	0.182475	-0.0312195	1.25283	0.217088	0.70614	-4.90885
CRELD2	CRELD2	-0.182421	-0.177578	-0.89428	0.376187	0.814076	-5.23824
SUMO3	SUMO3	-0.182412	-0.157331	-1.1875	0.241595	0.725441	-4.97652
PLCG2	PLCG2	-0.182395	-0.210754	-1.18	0.244534	0.728056	-4.98407
RPP14	RPP14	-0.182333	0.00771728	-2.25159	0.0295507	0.466783	-3.48975
DFFB	DFFB	0.182282	0.16767	1.87324	0.0678926	0.527539	-4.10724
TMED3	TMED3	0.182211	0.19062	0.935438	0.354825	0.797884	-5.20572
RGL2	RGL2	0.182166	-0.109777	1.2028	0.235684	0.721209	-4.96098
PCIF1	PCIF1	0.182128	0.0185734	1.62461	0.111607	0.599613	-4.46183
PRIM2	PRIM2	-0.182121	0.25805	-0.814974	0.419611	0.835071	-5.29692
FAM234A	FAM234A	0.182052	-0.253978	1.81105	0.0771736	0.54227	-4.19992
SLC5A1	SLC5A1	0.182046	0.0746674	0.830912	0.410647	0.831304	-5.28555
AAGAB	AAGAB	-0.182039	0.116168	-1.37229	0.177141	0.671674	-4.77654
SYNE2	SYNE2	0.182028	-0.0115488	2.05231	0.0463046	0.485283	-3.8262
MTFMT	MTFMT	-0.181805	-0.0643887	-1.29815	0.201206	0.687853	-4.85995
DHRS3	DHRS3	0.181723	0.0509324	1.43779	0.157784	0.658955	-4.69938
PRNP	PRNP	-0.181483	-0.657088	-1.1233	0.267589	0.741308	-5.03975
MBNL1	MBNL1	-0.18147	0.0206463	-1.98186	0.0539582	0.507238	-3.93924
HTATIP2	HTATIP2	0.181388	0.0806732	1.21023	0.232851	0.718903	-4.95336
EIF2B1	EIF2B1	-0.181349	0.103607	-2.05714	0.0458154	0.485283	-3.81832
NAAA	NAAA	0.181302	-0.184493	1.18259	0.243516	0.727679	-4.98147
BANF1	BANF1	0.181269	-0.052478	1.56008	0.126125	0.627322	-4.54677
TUBB6	TUBB6	-0.181254	-0.248178	-1.47273	0.148158	0.652796	-4.6569
ADPGK	ADPGK	-0.181034	0.0721951	-1.53114	0.133112	0.640608	-4.58387
ABCB8	ABCB8	0.181	0.0294317	1.53667	0.131755	0.639749	-4.57684
DPT	DPT	0.181	-0.98049	0.765651	0.448097	0.85097	-5.33077
OAS1	OAS1	0.180976	-0.118583	0.637769	0.527031	0.87892	-5.40895
DTX3L	DTX3L	-0.180951	0.119485	-1.51123	0.138098	0.645747	-4.60905
AQP8	AQP8	-0.180889	-1.55009	-0.665793	0.509125	0.873429	-5.39301
CTRC	CTRC	-0.180853	-1.13262	-0.506551	0.615076	0.915475	-5.47465
ABHD12	ABHD12	0.180846	0.0317854	1.50553	0.139553	0.645978	-4.61621
TRAPPC3	TRAPPC3	-0.180827	-0.032978	-2.39138	0.0212657	0.45588	-3.23974
DCAF13	DCAF13	0.180776	0.251251	1.94019	0.0589809	0.507895	-4.0046
RTN1	RTN1	-0.18065	-0.166388	-1.47505	0.147539	0.652454	-4.65406
CYBA	CYBA	-0.18062	0.102083	-0.8944	0.376124	0.814076	-5.23814
IDH2	IDH2	-0.180575	-0.101263	-1.32623	0.191815	0.680798	-4.82885
FBXO2	FBXO2	0.180491	-0.290923	0.739385	0.46372	0.853086	-5.34796
IRF2BPL	IRF2BPL	-0.180488	-0.140742	-1.43405	0.158845	0.658955	-4.70388
BAG2	BAG2	-0.180449	-0.598617	-1.03432	0.30681	0.771175	-5.12193
ZKSCAN1	ZKSCAN1	0.180371	0.142332	1.04146	0.303524	0.769166	-5.11557
PLBD2	PLBD2	0.180334	-0.109357	0.831074	0.410556	0.831304	-5.28543
GSTT1	GSTT1	0.180241	-0.680076	0.438447	0.663273	0.929699	-5.50289
CCDC127	CCDC127	0.18011	-0.0330985	1.69456	0.0974444	0.578702	-4.36642
CELF1	CELF1	-0.179918	0.197746	-1.78879	0.0807472	0.548117	-4.23246
LPCAT3	LPCAT3	0.17984	0.0105146	1.16533	0.250357	0.731026	-4.99873
DNAJB12	DNAJB12	-0.179743	-0.142046	-1.10511	0.275301	0.746805	-5.05706
RB1	RB1	-0.179731	0.133222	-1.22067	0.22891	0.715578	-4.94258
MET	MET	-0.179607	-0.0324415	-0.990645	0.327441	0.786301	-5.15992
LSS	LSS	-0.179505	0.0115122	-1.27562	0.20899	0.697377	-4.88446
NDUFA6	NDUFA6	-0.179484	-0.253771	-1.08872	0.282386	0.75312	-5.07244
KBTBD11	KBTBD11	0.179481	-0.240005	1.4254	0.161313	0.661221	-4.71422
SPTAN1	SPTAN1	0.17943	-0.00433171	1.66869	0.102499	0.588059	-4.40211
ELF1	ELF1	0.179412	0.00274251	1.14898	0.256962	0.735648	-5.01485
COX17	COX17	0.179381	-0.281327	0.924007	0.360677	0.803696	-5.21489
EIF2B4	EIF2B4	-0.179332	0.059322	-2.50461	0.0161593	0.444647	-3.02924
TRPV2	TRPV2	-0.179193	0.0116024	-1.3602	0.180907	0.672054	-4.79043
MRPS36	MRPS36	0.179118	-0.074322	1.94154	0.0588124	0.507895	-4.0025
MMP8	MMP8	-0.17898	-0.157374	-0.454469	0.651794	0.925545	-5.49661
NME7	NME7	0.178967	-0.0315707	1.97882	0.0543112	0.507238	-3.94404
RRP1	RRP1	0.178793	0.37531	1.54073	0.130765	0.638155	-4.57165
VAMP5	VAMP5	-0.178758	-0.261133	-0.839279	0.405988	0.826414	-5.27949
POLR2K	POLR2K	0.178623	0.0703545	0.966834	0.339073	0.792518	-5.17998
ST5	ST5	-0.178604	-0.22229	-1.65869	0.104509	0.59138	-4.41577
GM2A	GM2A	0.178511	-0.418315	0.760106	0.451369	0.85097	-5.33445
ACO2	ACO2	0.178483	-0.264971	1.24417	0.220226	0.707425	-4.91801
ARL2	ARL2	0.178414	-0.114461	0.935801	0.35464	0.797884	-5.20543
CCDC90B	CCDC90B	0.178411	0.0134976	1.40189	0.168179	0.662134	-4.74207
SIGLEC5	SIGLEC5	-0.178275	-0.202099	-0.493274	0.624347	0.91874	-5.48047
UGT2A2	UGT2A2	-0.178233	-1.01178	-0.688941	0.494588	0.867372	-5.37934
RBL2	RBL2	0.178176	-0.0420891	1.60992	0.114788	0.60282	-4.48144
YES1	YES1	-0.178169	-0.0992634	-1.46568	0.150064	0.654193	-4.66555
NCAPG2	NCAPG2	-0.177913	0.0435536	-1.34863	0.184566	0.673586	-4.80361
MRPL51	MRPL51	0.177902	0.186661	0.990173	0.32767	0.786301	-5.16033
KIF11	KIF11	-0.177831	0.154602	-1.02141	0.312814	0.774754	-5.13332
COLEC12	COLEC12	-0.177804	-1.14515	-0.624424	0.535672	0.883678	-5.41631
FNDC3A	FNDC3A	-0.177612	0.0854463	-2.16305	0.0361832	0.46963	-3.6422
PRDX6	PRDX6	0.177567	-0.4037	1.35235	0.183386	0.673044	-4.79939
PDZD11	PDZD11	0.177505	0.0263488	1.97951	0.0542308	0.507238	-3.94295
GOLGA5	GOLGA5	0.177435	0.123559	1.96944	0.0554154	0.507238	-3.95885
HIGD2A	HIGD2A	0.17742	0.171915	1.12709	0.266002	0.740734	-5.03611
CEBPB	CEBPB	0.177305	0.32285	1.27498	0.209212	0.697377	-4.88515
TELO2	TELO2	-0.17728	0.0854167	-0.978044	0.333564	0.789641	-5.1706
LONP2	LONP2	-0.177085	-0.121593	-1.18771	0.241516	0.725441	-4.97631
MAGT1	MAGT1	-0.177072	0.14238	-2.26055	0.0289437	0.466783	-3.47406
LHPP	LHPP	0.177062	-0.716517	0.665992	0.508999	0.873429	-5.39289
GPD2	GPD2	0.177037	0.157002	1.41025	0.16571	0.662134	-4.73221
RABGAP1	RABGAP1	0.176934	-0.121539	2.07089	0.0444508	0.480751	-3.79586
SF1	SF1	0.176888	0.196385	2.09633	0.042018	0.480146	-3.75397
CFHR1	CFHR1	-0.176872	-0.318732	-0.599639	0.551916	0.888672	-5.42957
THEMIS2	THEMIS2	-0.176818	0.0664488	-1.14772	0.257477	0.735648	-5.01608
NFIC	NFIC	-0.176813	-0.136444	-1.42494	0.161447	0.661221	-4.71478
OGDHL	OGDHL	0.176715	-0.279046	0.751996	0.45618	0.852318	-5.33978
GPKOW	GPKOW	-0.176663	0.063339	-2.20726	0.0327229	0.466783	-3.56666
TMEM167A	TMEM167A	-0.176605	0.138501	-1.5968	0.117689	0.609507	-4.49881
STXBP2	STXBP2	0.176534	0.0995951	1.70162	0.0960999	0.576949	-4.35659
SPINK4	SPINK4	0.176532	-0.728115	0.417194	0.678627	0.933371	-5.51088
XIAP	XIAP	0.17636	-0.0351024	1.84022	0.0726959	0.533608	-4.15678
TIMM22	TIMM22	0.176342	0.0783818	2.03175	0.048434	0.489647	-3.85951
HMGB1	HMGB1	0.176194	0.138227	1.26582	0.212442	0.700606	-4.89499
ARPC1B	ARPC1B	-0.176183	0.18042	-2.00274	0.051583	0.496418	-3.90607
ELMOD2	ELMOD2	-0.17604	0.0496415	-1.72501	0.0917594	0.566402	-4.3238
CDHR5	CDHR5	0.175983	-0.401763	1.04033	0.304042	0.769166	-5.11657
GRK2	GRK2	-0.175969	0.0377976	-2.12818	0.0391369	0.47643	-3.70095
CDC42EP4	CDC42EP4	0.175955	-0.371498	1.61481	0.113722	0.60282	-4.47494
CPT1A	CPT1A	0.175932	-0.239946	1.12334	0.267573	0.741308	-5.03971
PEX19	PEX19	0.175914	0.0082122	1.64656	0.106993	0.594266	-4.43227
PPA2	PPA2	0.175891	-0.0878366	0.914577	0.365551	0.806895	-5.22238
DIMT1	DIMT1	-0.175824	0.252173	-1.3808	0.174529	0.671057	-4.7667
WDR74	WDR74	-0.175714	0.137607	-1.62709	0.111079	0.599613	-4.45852
PDLIM7	PDLIM7	-0.175577	-1.1403	-0.663754	0.510417	0.874055	-5.39419
FAAH	FAAH	-0.175504	-0.109766	-0.950158	0.347381	0.794994	-5.19376
ARL6IP4	ARL6IP4	0.175346	-0.106722	1.56374	0.125262	0.627048	-4.54203
P2RX4	P2RX4	0.175287	-0.169532	1.39791	0.169362	0.66386	-4.74674
MRPL49	MRPL49	0.175273	0.186446	1.14236	0.25967	0.736904	-5.02131
FHL3	FHL3	-0.175218	0.012478	-0.875157	0.386387	0.817582	-5.25287
NOP58	NOP58	0.175214	0.277715	1.78121	0.0819955	0.550362	-4.24347
DTD1	DTD1	-0.175191	-0.115712	-1.02501	0.311132	0.774754	-5.13016
SERPINA7	SERPINA7	-0.175177	-0.574832	-0.963218	0.340863	0.792674	-5.18299
AHCYL2	AHCYL2	0.175141	-0.602551	1.08839	0.28253	0.75312	-5.07275
SUPT16H	SUPT16H	0.175139	0.260317	1.47726	0.146948	0.652454	-4.65134
PSME4	PSME4	-0.175113	0.00665543	-1.74181	0.0887449	0.563194	-4.30002
AIDA	AIDA	-0.175026	-0.101283	-1.49919	0.141185	0.647319	-4.62414
TXNL4A	TXNL4A	-0.174915	-0.0328103	-1.18533	0.242445	0.725795	-4.97871
SSBP3	SSBP3	0.174911	0.167817	1.34779	0.184835	0.673586	-4.80457
C7orf26	C7orf26	-0.174902	-0.0275802	-1.75098	0.0871338	0.558708	-4.28695
ARCN1	ARCN1	-0.174847	0.164666	-1.93971	0.0590414	0.507895	-4.00535
HACD4	HACD4	-0.174842	-0.253984	-1.14438	0.258843	0.736578	-5.01935
APOL3	APOL3	-0.174819	-0.124778	-0.828294	0.412111	0.831739	-5.28743
REPIN1	REPIN1	0.174682	0.0191965	1.34447	0.185898	0.67423	-4.80833
ASAP1	ASAP1	0.174606	0.059389	1.23092	0.225092	0.713675	-4.93192
PLEKHA2	PLEKHA2	0.174531	-0.0432634	1.47333	0.148	0.652796	-4.65617
ABI3	ABI3	-0.174518	-0.0991244	-1.36779	0.178537	0.671674	-4.78173
RBCK1	RBCK1	0.174432	-0.0348266	1.42002	0.162866	0.662134	-4.72064
TMED9	TMED9	-0.174419	0.172132	-1.48818	0.144053	0.649977	-4.63783
GEMIN8	GEMIN8	-0.174359	0.17805	-1.32839	0.191108	0.680507	-4.82644
SNX3	SNX3	-0.174184	0.0285927	-2.21324	0.0322779	0.466783	-3.55635
MINPP1	MINPP1	-0.174105	0.111998	-1.62874	0.110728	0.599613	-4.45631
ISCU	ISCU	0.174064	0.113812	1.27513	0.209159	0.697377	-4.88498
YIPF5	YIPF5	-0.173798	0.0679585	-1.49919	0.141186	0.647319	-4.62414
FAM103A1	FAM103A1	0.17376	0.1571	1.17344	0.247124	0.729212	-4.99064
DHFR	DHFR	-0.173747	0.0583851	-1.03748	0.305355	0.769862	-5.11912
CRLF3	CRLF3	-0.173712	-0.0801976	-1.27623	0.208774	0.697377	-4.8838
ARIH1	ARIH1	-0.173611	-0.0301098	-1.73469	0.0900116	0.565437	-4.31011
ATP6V1G1	ATP6V1G1	-0.17361	0.121034	-1.55217	0.128005	0.63217	-4.55697
LXN	LXN	-0.173607	-0.0573683	-1.12926	0.265094	0.740548	-5.03401
DUS1L	DUS1L	0.173534	-0.00798875	1.96387	0.0560796	0.507238	-3.9676
C6	C6	-0.173527	-0.298676	-0.603379	0.54945	0.888672	-5.4276
PYGM	PYGM	-0.173509	-0.850478	-1.10377	0.275875	0.746912	-5.05833
NADK2	NADK2	0.173416	-0.0592488	1.36826	0.178391	0.671674	-4.78119
ALDH2	ALDH2	0.173396	-0.065778	0.857747	0.395823	0.82127	-5.26592
STAT3	STAT3	-0.173316	0.0305707	-1.87743	0.0673034	0.527539	-4.10091
ARMC6	ARMC6	-0.173224	0.173544	-2.10566	0.0411549	0.477115	-3.7385
ENY2	ENY2	0.173155	0.165131	1.54464	0.129816	0.635818	-4.56664
NOP14	NOP14	0.173148	0.299305	1.51099	0.138158	0.645747	-4.60935
B3GNT7	B3GNT7	-0.173108	-0.643673	-0.908057	0.368946	0.809009	-5.22751
PTPRE	PTPRE	-0.172906	0.103695	-1.17089	0.248139	0.729275	-4.99319
COL28A1	COL28A1	0.172635	-1.18007	0.913769	0.365971	0.806895	-5.22302
OSTC	OSTC	-0.172614	0.154756	-1.18121	0.244059	0.727957	-4.98286
STMN2	STMN2	0.172556	-0.00667805	0.647108	0.521027	0.877196	-5.40372
SLC5A6	SLC5A6	0.172464	0.21689	0.822551	0.415335	0.833189	-5.29154
COX7A2L	COX7A2L	0.172435	-0.124339	0.972781	0.336143	0.791249	-5.17502
MAD2L1	MAD2L1	-0.172253	0.13892	-1.448	0.154923	0.65692	-4.68706
ATIC	ATIC	0.172234	0.0385732	1.19243	0.23968	0.723369	-4.97153
DDX21	DDX21	-0.172213	0.303966	-1.17647	0.245926	0.728939	-4.98761
DPY19L1	DPY19L1	-0.172209	0.11505	-1.79169	0.0802731	0.548117	-4.22824
TMEM57	TMEM57	0.172177	0.157208	1.90001	0.0642013	0.522318	-4.06657
SHOC2	SHOC2	-0.172027	-0.147346	-2.14044	0.038075	0.473998	-3.68038
HAAO	HAAO	0.171936	-0.420083	1.08261	0.285061	0.75312	-5.07812
GAR1	GAR1	0.171899	0.34039	1.36467	0.179508	0.671674	-4.78531
SPTB	SPTB	-0.17186	-0.674088	-0.92544	0.35994	0.803022	-5.21375
RANBP6	RANBP6	0.171847	-0.176046	0.591385	0.557382	0.890892	-5.43387
TM9SF1	TM9SF1	0.17183	0.100322	1.15094	0.256162	0.735648	-5.01292
PITPNA	PITPNA	0.171809	-0.367839	0.637507	0.5272	0.87892	-5.4091
ARF1	ARF1	0.171789	-0.147271	0.590745	0.557806	0.891355	-5.4342
SOWAHC	SOWAHC	0.171784	-0.15232	1.28501	0.205719	0.69358	-4.87429
GPALPP1	GPALPP1	0.171739	-0.0919066	0.897501	0.374486	0.814076	-5.23574
MTERF4	MTERF4	0.171692	0.162458	1.39351	0.170679	0.665569	-4.7519
CBX1	CBX1	0.171691	-0.176659	1.19687	0.237964	0.723369	-4.96702
SYNGR2	SYNGR2	0.171611	0.0828151	1.13942	0.260883	0.738442	-5.02418
POLR2L	POLR2L	-0.171429	0.235132	-1.9468	0.0581583	0.507238	-3.99431
MANF	MANF	-0.171356	0.0494415	-1.31808	0.194506	0.682998	-4.83794
VPS36	VPS36	0.171286	0.00672439	1.6213	0.112317	0.600415	-4.46626
RRP12	RRP12	0.171275	0.296422	1.52362	0.134978	0.643487	-4.59342
RPS29	RPS29	-0.171272	0.185454	-1.19416	0.239009	0.723369	-4.96978
DAP3	DAP3	0.171252	0.113695	1.24087	0.22143	0.708905	-4.92149
PITPNB	PITPNB	0.171079	-0.26998	0.76364	0.449282	0.85097	-5.33211
GSTM4	GSTM4	-0.17083	-0.678577	-0.422152	0.675033	0.932086	-5.50905
RNF214	RNF214	-0.170736	0.00726829	-2.10183	0.0415072	0.477115	-3.74485
SIRPA	SIRPA	-0.170709	0.024492	-0.875569	0.386165	0.817425	-5.25255
FOXK1	FOXK1	0.170642	0.260105	1.4655	0.150113	0.654193	-4.66577
TRAF2	TRAF2	0.170503	0.0536463	1.5156	0.136992	0.644383	-4.60355
PDE3A	PDE3A	-0.170272	-0.431105	-1.19238	0.239699	0.723369	-4.97158
SAAL1	SAAL1	-0.170206	0.100066	-1.14562	0.258335	0.735648	-5.01814
SUSD2	SUSD2	-0.169997	-0.332998	-0.859383	0.39493	0.82119	-5.26471
MRE11	MRE11	0.169925	0.0451756	1.01914	0.31388	0.775112	-5.13531
OSGEP	OSGEP	0.169774	-0.00983206	1.38025	0.174696	0.671057	-4.76734
C16orf62	C16orf62	-0.169666	-0.209578	-1.15037	0.256397	0.735648	-5.01349
C11orf98	C11orf98	-0.169595	0.159478	-1.7599	0.08559	0.555565	-4.27418
FUK	FUK	0.169593	0.0464683	1.58183	0.121071	0.619516	-4.51848
ATP6V1A	ATP6V1A	-0.169569	0.0533024	-1.87342	0.0678683	0.527539	-4.10698
CD14	CD14	-0.169433	-0.160871	-1.07542	0.288227	0.756643	-5.08476
MYO15B	MYO15B	0.169425	-0.195456	0.819238	0.417201	0.83369	-5.2939
APLP2	APLP2	0.169392	-0.0603976	1.30381	0.199286	0.685936	-4.85373
GOSR2	GOSR2	-0.169291	-0.0470707	-1.62473	0.111582	0.599613	-4.46168
WAS	WAS	-0.169208	-0.109624	-1.0737	0.28899	0.757224	-5.08634
SUB1	SUB1	0.169134	-0.198451	0.749106	0.457902	0.852318	-5.34167
DUSP3	DUSP3	-0.16907	-0.330154	-1.48985	0.143616	0.649028	-4.63576
CDK13	CDK13	0.169043	0.026762	1.0393	0.304517	0.769166	-5.1175
RPS27A	RPS27A	-0.16903	0.217493	-1.40154	0.168283	0.662134	-4.74249
PDCD4	PDCD4	0.169008	-0.387276	1.24782	0.218898	0.706685	-4.91415
[truncated: 4,599 more rows]

## Sheet: TROP2_High_vs_low_RNA
gene_id	baseMean	log2FoldChange	lfcSE	stat	pvalue	padj	gene_name
ENSG00000184292.7	1231.84	3.40081	0.541654	6.27858	3.41689e-10	6.63458e-06	TACSTD2
ENSG00000144355.15	14.9512	3.79927	0.642882	5.90975	3.42632e-09	3.32645e-05	DLX1
ENSG00000151650.8	65.295	2.94853	0.564376	5.22441	1.74707e-07	0.00113076	VENTX
ENSG00000130226.17	23.6572	3.51142	0.701983	5.00214	5.66963e-07	0.00275218	DPP6
ENSG00000229847.9	25.5807	3.63035	0.774499	4.68735	2.7676e-06	0.0107477	EMX2OS
ENSG00000141579.7	18.1622	3.07758	0.673853	4.56714	4.94419e-06	0.0120002	ZNF750
ENSG00000185924.7	22.0899	2.71376	0.588905	4.60815	4.06261e-06	0.0120002	RTN4RL1
ENSG00000135925.9	90.5797	2.12666	0.464551	4.57789	4.69688e-06	0.0120002	WNT10A
ENSG00000232810.4	36.1647	-1.68209	0.377671	-4.45385	8.43454e-06	0.0181971	TNF
ENSG00000121769.8	247.275	1.89484	0.436957	4.33645	1.44804e-05	0.0234305	FABP3
ENSG00000211934.3	975.919	-2.96416	0.679295	-4.36359	1.27947e-05	0.0234305	IGHV1-2
ENSG00000105852.11	263.227	2.48467	0.570942	4.35188	1.34972e-05	0.0234305	PON3
ENSG00000260653.6	8.50158	3.32674	0.77248	4.30656	1.65809e-05	0.0247655	AC237221.1
ENSG00000105655.19	164.671	1.50261	0.352006	4.2687	1.96614e-05	0.0272689	ISYNA1
ENSG00000235269.2	19.4927	2.91697	0.688536	4.23648	2.2705e-05	0.0275018	LINC02331
ENSG00000163568.15	120.776	-2.06442	0.488821	-4.22327	2.40784e-05	0.0275018	AIM2
ENSG00000141968.8	237.41	-0.92114	0.216816	-4.24849	2.15219e-05	0.0275018	VAV1
ENSG00000007516.14	93.896	1.86271	0.443719	4.19795	2.69343e-05	0.0290547	BAIAP3
ENSG00000273824.1	11.3674	-2.84182	0.679425	-4.18268	2.88088e-05	0.029441	AC008033.3
ENSG00000262406.3	4297.84	-1.78972	0.431449	-4.14815	3.35168e-05	0.0325398	MMP12
ENSG00000087250.9	19.6267	2.99748	0.735607	4.07483	4.60473e-05	0.0377657	MT3
ENSG00000223648.4	34.004	-2.91183	0.710663	-4.09734	4.17922e-05	0.0377657	IGHV3-64
ENSG00000120057.5	14.5997	3.59295	0.882617	4.0708	4.68523e-05	0.0377657	SFRP5
ENSG00000066405.13	220.853	3.96219	0.975395	4.06214	4.86246e-05	0.0377657	CLDN18
ENSG00000131042.15	243.367	-1.15261	0.282959	-4.07341	4.63305e-05	0.0377657	LILRB2
ENSG00000211899.10	3629.52	-2.03973	0.511479	-3.98791	6.66577e-05	0.0462247	IGHM
ENSG00000198759.12	131.799	-1.28032	0.320681	-3.99251	6.53772e-05	0.0462247	EGFL6
ENSG00000115009.13	1361.04	-1.78914	0.446984	-4.00269	6.26263e-05	0.0462247	CCL20
ENSG00000148408.13	9.90448	3.30815	0.835836	3.95789	7.56143e-05	0.0506277	CACNA1B
ENSG00000164951.16	1566.06	0.994623	0.253473	3.92398	8.70991e-05	0.0563735	PDP1
ENSG00000143412.10	218.657	1.08369	0.280161	3.8681	0.000109688	0.0649609	ANXA9
ENSG00000196549.12	1621.84	2.1137	0.546668	3.86651	0.000110404	0.0649609	MME
ENSG00000129757.14	175.569	1.53795	0.396895	3.87496	0.000106642	0.0649609	CDKN1C
ENSG00000105707.14	51.5216	-2.80139	0.732938	-3.82213	0.000132303	0.0715637	HPN
ENSG00000187595.16	40.3216	1.52136	0.398819	3.81466	0.000136368	0.0715637	ZNF385C
ENSG00000244482.10	82.4466	-1.24337	0.325765	-3.81677	0.000135208	0.0715637	LILRA6
ENSG00000182575.8	110.09	2.05252	0.537345	3.81974	0.00013359	0.0715637	NXPH3
ENSG00000163879.11	173.442	-1.81443	0.477276	-3.80163	0.000143747	0.073451	DNALI1
ENSG00000102678.7	32.5005	2.05647	0.544358	3.77778	0.00015823	0.0787783	FGF9
ENSG00000100321.15	79.0214	1.32823	0.358703	3.70287	0.000213172	0.102757	SYNGR1
ENSG00000113209.9	14.3625	1.99952	0.542118	3.68835	0.000225714	0.102757	PCDHB5
ENSG00000111432.4	91.3896	-2.67347	0.723707	-3.69413	0.000220642	0.102757	FZD10
ENSG00000133063.16	127.629	-2.15123	0.583578	-3.68627	0.000227562	0.102757	CHIT1
ENSG00000105989.10	423.8	-1.00152	0.27239	-3.67678	0.000236201	0.104234	WNT2
ENSG00000181085.15	110.55	1.72799	0.473202	3.65169	0.000260516	0.109966	MAPK15
ENSG00000276566.1	80.1643	-3.23138	0.884342	-3.65399	0.000258192	0.109966	IGKV1D-13
ENSG00000119630.14	186.247	0.87232	0.24204	3.60404	0.000313312	0.118345	PGF
ENSG00000166897.16	18.0332	1.95676	0.540225	3.62212	0.000292198	0.118345	ELFN2
ENSG00000064195.7	53.1874	4.05468	1.12345	3.60914	0.000307213	0.118345	DLX3
ENSG00000164879.7	36.9475	1.73841	0.482751	3.60105	0.000316937	0.118345	CA3
ENSG00000146232.17	486.777	-0.490535	0.135923	-3.60892	0.000307479	0.118345	NFKBIE
ENSG00000143147.14	337.613	0.975262	0.270117	3.61052	0.000305583	0.118345	GPR161
ENSG00000043462.13	736.647	-1.11503	0.311433	-3.58033	0.000343162	0.12572	LCP2
ENSG00000127863.16	226.887	2.0753	0.585963	3.54169	0.000397575	0.133563	TNFRSF19
ENSG00000169908.12	4146	1.15288	0.325414	3.54281	0.000395881	0.133563	TM4SF1
ENSG00000167281.19	10.7299	1.79621	0.506348	3.54738	0.000389081	0.133563	RBFOX3
ENSG00000158816.15	15.0571	-4.4176	1.24764	-3.54077	0.000398963	0.133563	VWA5B1
ENSG00000269028.3	522.387	1.37912	0.387648	3.55765	0.000374186	0.133563	MTRNR2L12
ENSG00000224650.2	470.199	-2.02335	0.576303	-3.51091	0.000446569	0.139855	IGHV3-74
ENSG00000186377.8	180.312	-1.76257	0.50161	-3.51383	0.000441702	0.139855	CYP4X1
ENSG00000101336.17	450.106	-0.932689	0.265468	-3.51337	0.000442458	0.139855	HCK
ENSG00000075461.6	65.4888	3.16313	0.900142	3.51403	0.00044136	0.139855	CACNG4
ENSG00000259803.7	7.25638	2.38783	0.683327	3.49441	0.000475104	0.144142	SLC22A31
ENSG00000186895.4	12.6058	4.40086	1.25888	3.49585	0.000472549	0.144142	FGF3
ENSG00000095739.11	735.692	1.83667	0.526744	3.48684	0.000488759	0.146004	BAMBI
ENSG00000223756.7	25.8194	-0.945017	0.272587	-3.46685	0.000526604	0.154925	TSSC2
ENSG00000170689.10	1972.96	-1.45122	0.420607	-3.4503	0.000559973	0.157616	HOXB9
ENSG00000211655.3	122.66	-2.67565	0.775051	-3.45222	0.000555996	0.157616	IGLV1-36
ENSG00000080007.8	35.3307	-2.48581	0.721289	-3.44635	0.000568218	0.157616	DDX43
ENSG00000160185.15	38.9033	-1.16522	0.337914	-3.44828	0.000564161	0.157616	UBASH3A
ENSG00000198848.13	364.93	1.72282	0.502433	3.42895	0.000605917	0.165705	CES1
ENSG00000173905.9	3858.32	-0.759157	0.222646	-3.4097	0.000650341	0.172982	GOLIM4
ENSG00000198598.6	48.8353	1.55775	0.456395	3.41316	0.000642147	0.172982	MMP17
ENSG00000284977.2	16.2182	-1.17784	0.346099	-3.40319	0.000666046	0.174765	AL160272.1
ENSG00000049249.9	127.733	-1.05709	0.311891	-3.3893	0.000700723	0.179025	TNFRSF9
ENSG00000198185.11	116.427	-2.12803	0.627384	-3.39191	0.000694073	0.179025	ZNF334
ENSG00000251301.7	60.6009	-1.77545	0.526354	-3.37312	0.000743224	0.182673	LINC02384
ENSG00000160224.17	17.1481	2.80721	0.832216	3.37318	0.00074306	0.182673	AIRE
ENSG00000139572.4	53.0834	-1.17152	0.347184	-3.37436	0.000739876	0.182673	GPR84
ENSG00000237686.7	42.3469	-1.33696	0.39724	-3.36564	0.000763676	0.185354	AL109615.3
ENSG00000175895.4	1002.71	0.638136	0.189841	3.36142	0.00077543	0.185883	PLEKHF2
ENSG00000168300.14	2212.3	0.603486	0.179939	3.35384	0.000796994	0.186448	PCMTD1
ENSG00000185015.8	397.622	1.06681	0.318063	3.35408	0.000796284	0.186448	CA13
ENSG00000242076.2	49.1341	-2.12171	0.637031	-3.33062	0.000866524	0.194519	IGKV1-33
ENSG00000271178.1	23.7249	-2.35336	0.706561	-3.33072	0.000866216	0.194519	IGHV3OR16-13
ENSG00000139344.8	27.4273	1.52843	0.459101	3.32919	0.000870998	0.194519	AMDHD1
ENSG00000253522.6	174.386	-1.30971	0.393423	-3.32901	0.000871565	0.194519	MIR3142HG
ENSG00000223350.2	88.8336	-2.07311	0.623498	-3.32496	0.000884318	0.195123	IGLV9-49
ENSG00000104972.15	189.233	-1.08166	0.326718	-3.31068	0.0009307	0.196737	LILRB1
ENSG00000181333.12	258.159	2.81965	0.851796	3.31024	0.000932162	0.196737	HEPHL1
ENSG00000089199.10	51.7367	2.19107	0.661125	3.31416	0.000919201	0.196737	CHGB
ENSG00000135333.14	127.287	1.68568	0.50908	3.31123	0.000928879	0.196737	EPHA7
ENSG00000133067.17	259.365	1.71597	0.519255	3.30468	0.000950847	0.198523	LGR6
ENSG00000182325.11	504.101	0.848021	0.25781	3.28932	0.00100429	0.20745	FBXL6
ENSG00000042832.12	185.619	-1.9523	0.595603	-3.27785	0.00104602	0.211568	TG
ENSG00000123124.14	3074.14	0.659299	0.201072	3.27891	0.00104208	0.211568	WWP1
ENSG00000111962.8	127.452	1.22432	0.374241	3.27148	0.00106986	0.21416	UST
ENSG00000126247.11	5735.16	0.433182	0.132556	3.26791	0.00108344	0.214666	CAPNS1
ENSG00000159713.11	745.22	1.45005	0.444193	3.26445	0.00109677	0.215112	TPPP3
ENSG00000103260.9	341.969	1.1604	0.356113	3.25851	0.00112	0.215318	METRN
ENSG00000147257.15	172.897	1.46156	0.448163	3.26122	0.00110934	0.215318	GPC3
ENSG00000078814.17	81.7162	1.79409	0.552406	3.24777	0.00116314	0.221418	MYH7B
ENSG00000167244.21	6.59395	2.19596	0.676997	3.24368	0.00117996	0.22244	IGF2
ENSG00000002586.20	2565.23	-0.678096	0.210085	-3.22772	0.00124782	0.225323	CD99
ENSG00000168779.20	29.3763	-2.09633	0.648394	-3.23311	0.0012245	0.225323	SHOX2
ENSG00000169248.13	807.019	-1.88069	0.583136	-3.22512	0.00125918	0.225323	CXCL11
ENSG00000164211.13	1117	-0.790283	0.245138	-3.22383	0.00126488	0.225323	STARD4
ENSG00000161509.14	18.5022	1.58255	0.489904	3.23033	0.00123648	0.225323	GRIN2C
ENSG00000104974.12	32.5675	-1.01414	0.314546	-3.22416	0.00126344	0.225323	LILRA1
ENSG00000100385.14	246.881	-1.04001	0.323281	-3.21703	0.00129523	0.228632	IL2RB
ENSG00000161016.18	50790.8	0.58337	0.181646	3.21157	0.00132012	0.230926	RPL8
ENSG00000144843.11	232.651	-0.595379	0.185613	-3.20764	0.00133829	0.232013	ADPRH
ENSG00000267476.1	9.08467	-2.94693	0.919477	-3.20501	0.00135059	0.232074	AC104365.1
ENSG00000185803.12	1270.94	0.669348	0.20948	3.19528	0.00139694	0.233353	SLC52A2
ENSG00000250971.3	25.9487	-3.00865	0.942466	-3.19232	0.00141136	0.233353	AC110772.2
ENSG00000235568.7	216.354	-0.728543	0.228316	-3.19094	0.00141812	0.233353	NFAM1
ENSG00000242445.1	15.7516	0.877376	0.274906	3.19155	0.00141512	0.233353	RPL7AP11
ENSG00000142623.11	130.974	1.99688	0.625314	3.19341	0.00140605	0.233353	PADI1
ENSG00000169245.6	2021.14	-1.83922	0.577014	-3.18747	0.00143522	0.234182	CXCL10
ENSG00000137574.11	1290.66	0.528158	0.165901	3.18358	0.00145467	0.235379	TGS1
ENSG00000276070.5	257.067	-1.50919	0.475039	-3.17698	0.00148819	0.236294	CCL4L2
ENSG00000224848.2	16.991	-1.50291	0.473861	-3.17163	0.00151588	0.236294	AL589843.1
ENSG00000105519.18	155.947	1.15268	0.36292	3.17612	0.00149259	0.236294	CAPS
ENSG00000115289.14	338.187	0.332705	0.10495	3.17011	0.00152379	0.236294	PCGF1
ENSG00000008118.10	12.2967	-1.12655	0.355829	-3.166	0.00154552	0.236294	CAMK1G
ENSG00000204839.9	372.695	1.25417	0.395963	3.16738	0.00153818	0.236294	MROH6
ENSG00000068971.14	346.337	-0.470429	0.148409	-3.1698	0.00152542	0.236294	PPP2R5B
ENSG00000245164.8	47.2789	-1.10731	0.350177	-3.16215	0.00156607	0.237565	LINC00861
ENSG00000260339.1	10.606	-1.10298	0.350545	-3.14646	0.0016526	0.246835	HEXA-AS1
ENSG00000234511.10	15.8335	-1.27116	0.403756	-3.14833	0.00164207	0.246835	C5orf58
ENSG00000241351.3	2412.88	-1.56237	0.497205	-3.14231	0.00167623	0.248452	IGKV3-11
ENSG00000179526.17	967.037	0.469431	0.149549	3.13897	0.00169541	0.249392	SHARPIN
ENSG00000100346.18	11.7262	1.7111	0.546884	3.12881	0.00175515	0.254326	CACNA1I
ENSG00000269220.1	15.0763	-1.2013	0.383785	-3.13014	0.00174722	0.254326	LINC00528
ENSG00000176623.12	1335.05	0.467404	0.149505	3.12635	0.00176992	0.254567	RMDN1
ENSG00000173947.14	73.7833	1.41043	0.453427	3.11059	0.00186713	0.266574	PIFO
ENSG00000204060.7	16.1155	1.33808	0.430993	3.10465	0.00190502	0.269999	FOXO6
ENSG00000259479.6	118.619	-1.22515	0.396953	-3.08639	0.002026	0.283013	SORD2P
ENSG00000111252.11	690.625	-0.585598	0.189634	-3.08805	0.00201474	0.283013	SH2B3
ENSG00000136048.14	833.253	-0.733232	0.238093	-3.07961	0.00207274	0.283644	DRAM1
ENSG00000260428.3	28.6515	1.24968	0.405822	3.07938	0.00207434	0.283644	SCX
ENSG00000145506.14	334.798	1.40485	0.455627	3.08333	0.00204696	0.283644	NKD2
ENSG00000104951.16	123.594	-1.15082	0.375189	-3.06732	0.00215989	0.285296	IL4I1
ENSG00000179331.3	23.3501	-1.07259	0.349481	-3.06909	0.00214715	0.285296	RAB39A
ENSG00000254231.3	51.1892	1.27111	0.41418	3.06899	0.00214785	0.285296	AC103760.1
ENSG00000259974.3	1573.19	-2.08845	0.679856	-3.0719	0.002127	0.285296	LINC00261
ENSG00000158714.11	143.963	-1.08783	0.354294	-3.07042	0.00213756	0.285296	SLAMF8
ENSG00000004799.8	824.725	0.891353	0.291105	3.06197	0.00219888	0.28784	PDK4
ENSG00000167757.14	264.212	1.97625	0.645703	3.06062	0.0022088	0.28784	KLK11
ENSG00000114115.10	635.104	1.68175	0.550401	3.0555	0.00224689	0.288362	RBP1
ENSG00000188483.8	158.753	1.01515	0.332438	3.05364	0.00226084	0.288362	IER5L
ENSG00000161243.9	19.4248	1.3226	0.432759	3.05622	0.0022415	0.288362	FBXO27
ENSG00000237515.9	39.3101	-2.76514	0.905968	-3.05213	0.0022722	0.288362	SHISA9
ENSG00000142273.13	868.257	0.495782	0.16265	3.04815	0.00230256	0.290316	CBLC
ENSG00000237748.1	12.3783	0.967614	0.318787	3.0353	0.00240297	0.301023	UQCRBP1
ENSG00000124249.7	28.535	2.31559	0.764339	3.02953	0.00244933	0.30281	KCNK15
ENSG00000259225.7	31.703	-1.78802	0.590548	-3.02772	0.00246403	0.30281	LINC02345
ENSG00000176692.8	17.7065	1.81889	0.60069	3.028	0.00246178	0.30281	FOXC2
ENSG00000130294.17	11.8564	2.29413	0.75858	3.02424	0.00249261	0.304397	KIF1A
ENSG00000066382.16	18.7951	1.46829	0.487474	3.01205	0.0025949	0.307227	MPPED2
ENSG00000167703.15	409.264	-0.60466	0.200532	-3.01528	0.00256743	0.307227	SLC43A2
ENSG00000186197.15	19.1784	1.20195	0.398407	3.01688	0.00255387	0.307227	EDARADD
ENSG00000266910.2	12.1863	0.902415	0.299459	3.01348	0.00258266	0.307227	AC008507.1
ENSG00000272347.1	13.0188	1.38488	0.459096	3.01654	0.00255679	0.307227	AC116351.2
ENSG00000005513.10	79.0801	2.11056	0.701173	3.01005	0.00261207	0.307385	SOX8
ENSG00000167772.12	191.078	1.03331	0.343518	3.00803	0.00262944	0.307566	ANGPTL4
ENSG00000233101.10	405.504	-1.08094	0.359868	-3.0037	0.00266717	0.31011	HOXB-AS3
ENSG00000015520.15	51.9136	-2.34715	0.785809	-2.98693	0.00281798	0.310282	NPC1L1
ENSG00000155096.14	5275.76	0.468617	0.156354	2.99715	0.00272519	0.310282	AZIN1
ENSG00000184371.14	367.31	-0.75859	0.253538	-2.99202	0.00277141	0.310282	CSF1
ENSG00000285744.1	97.474	-1.09714	0.367002	-2.98946	0.00279471	0.310282	AC083837.1
ENSG00000180316.12	13.4866	-1.26275	0.422581	-2.9882	0.00280626	0.310282	PNPLA1
ENSG00000244649.5	1079.71	-1.14868	0.383302	-2.99681	0.00272822	0.310282	LINC02086
ENSG00000147804.10	1486.04	1.03365	0.345471	2.99201	0.00277144	0.310282	SLC39A4
ENSG00000156170.13	519.739	0.5795	0.193501	2.99481	0.00274613	0.310282	NDUFAF6
ENSG00000108309.14	14.8282	1.45496	0.487294	2.98579	0.00282844	0.310282	RUNDC3A
ENSG00000211714.3	11.3322	-1.62844	0.543313	-2.99725	0.00272428	0.310282	TRBV7-3
ENSG00000182600.9	310.647	1.04334	0.349803	2.98267	0.00285748	0.311706	SNORC
ENSG00000104408.11	19543.4	0.644576	0.21694	2.97123	0.00296613	0.32175	EIF3E
ENSG00000100365.16	276.922	-0.701933	0.236571	-2.96711	0.00300613	0.322486	NCF4
ENSG00000213169.3	22.6017	1.05089	0.354131	2.96753	0.00300201	0.322486	AC069218.1
ENSG00000250569.1	16.6154	0.807653	0.272872	2.95982	0.00307818	0.328402	NTAN1P2
ENSG00000163131.11	8887.4	-0.645918	0.218976	-2.94972	0.00318061	0.330447	CTSS
ENSG00000111052.7	232.559	-1.47357	0.499585	-2.94959	0.00318199	0.330447	LIN7A
ENSG00000224099.2	53.1696	-2.73822	0.92668	-2.95488	0.00312795	0.330447	AC104823.1
ENSG00000127507.18	224.31	-0.821693	0.278583	-2.94954	0.00318244	0.330447	ADGRE2
ENSG00000250942.1	42.8435	-1.24786	0.422816	-2.95131	0.00316431	0.330447	ENPP7P11
ENSG00000172137.19	170.418	2.14961	0.729501	2.94669	0.00321199	0.331741	CALB2
ENSG00000262152.7	52.8561	1.74625	0.593036	2.94459	0.00323383	0.332229	LINC00514
ENSG00000204421.3	23.9288	1.50253	0.510663	2.94232	0.00325766	0.332916	LY6G6C
ENSG00000171246.6	22.1108	2.02549	0.68954	2.93745	0.00330928	0.333146	NPTX1
ENSG00000104412.8	1577.25	0.494072	0.168755	2.92774	0.00341433	0.333146	EMC2
ENSG00000240950.1	43.7043	1.01497	0.346527	2.92898	0.00340074	0.333146	AC021074.1
ENSG00000160570.14	709.264	0.375745	0.128325	2.92806	0.00341081	0.333146	DEDD2
ENSG00000132205.11	487.259	-0.635992	0.216719	-2.93464	0.00333933	0.333146	EMILIN2
ENSG00000171045.16	376.122	0.820161	0.279562	2.93374	0.00334905	0.333146	TSNARE1
ENSG00000141506.14	232.644	-0.897454	0.306385	-2.92917	0.00339868	0.333146	PIK3R5
ENSG00000131626.19	1216.46	-0.353167	0.120465	-2.9317	0.00337111	0.333146	PPFIA1
ENSG00000262943.7	15.6708	-2.1709	0.738997	-2.93763	0.00330728	0.333146	ALOX12P2
ENSG00000052795.13	1451.96	-0.398455	0.136249	-2.92446	0.0034506	0.334393	FNIP2
ENSG00000169696.16	715.981	0.830603	0.284416	2.92038	0.003496	0.334393	ASPSCR1
ENSG00000092445.12	317.563	0.969408	0.331782	2.92182	0.00347995	0.334393	TYRO3
ENSG00000177173.5	22.1587	-0.84165	0.287928	-2.92313	0.00346535	0.334393	NAP1L4P1
ENSG00000213085.10	24.283	1.04219	0.357434	2.91576	0.00354821	0.337723	CFAP45
ENSG00000211665.3	30.149	-2.21655	0.762484	-2.90701	0.00364906	0.343951	IGLV3-16
ENSG00000135439.11	90.1313	-0.982383	0.337768	-2.90845	0.00363222	0.343951	AGAP2
ENSG00000172345.14	96.2423	-0.753607	0.259498	-2.90409	0.00368316	0.345488	STARD5
ENSG00000183019.7	30.2435	-1.29009	0.444755	-2.90067	0.00372364	0.347605	MCEMP1
ENSG00000229314.5	10.6634	-2.26179	0.780215	-2.89892	0.00374445	0.347876	ORM1
ENSG00000156162.16	1331.46	0.593279	0.205357	2.88901	0.00386458	0.35282	DPY19L4
ENSG00000188039.16	33.4812	1.32728	0.459538	2.8883	0.00387332	0.35282	NWD1
ENSG00000148219.17	105.04	0.77463	0.268495	2.88509	0.00391304	0.35282	ASTN2
ENSG00000179583.19	658.71	-1.00585	0.348585	-2.88552	0.00390766	0.35282	CIITA
ENSG00000175489.10	131.009	-0.794496	0.275471	-2.88414	0.00392486	0.35282	LRRC25
ENSG00000163083.6	181.343	1.74107	0.6026	2.88926	0.00386146	0.35282	INHBB
ENSG00000167702.13	455.312	0.755293	0.26115	2.89218	0.00382576	0.35282	KIFC2
ENSG00000115008.6	128.542	-1.50411	0.522286	-2.87985	0.0039786	0.35295	IL1A
ENSG00000070756.17	34285.1	0.565048	0.196219	2.87968	0.00398084	0.35295	PABPC1
ENSG00000144191.12	18.1297	1.86028	0.645639	2.88129	0.00396048	0.35295	CNGA3
ENSG00000102924.12	26.6902	1.75099	0.610728	2.86704	0.00414325	0.356761	CBLN1
ENSG00000162998.5	546.673	-1.079	0.376801	-2.86357	0.00418892	0.356761	FRZB
ENSG00000258655.2	50.2675	0.622574	0.217519	2.86216	0.00420771	0.356761	ARHGAP5-AS1
ENSG00000287839.1	98.1071	-0.96907	0.338481	-2.863	0.00419656	0.356761	AL353807.5
ENSG00000153292.16	84.292	1.86339	0.650587	2.86417	0.00418108	0.356761	ADGRF1
ENSG00000069248.12	1959.71	0.357214	0.124638	2.86602	0.00415668	0.356761	NUP133
ENSG00000104413.18	3806.84	0.530168	0.185025	2.86539	0.00416501	0.356761	ESRP1
ENSG00000147677.11	10098.7	0.530544	0.184862	2.86995	0.00410539	0.356761	EIF3H
ENSG00000137460.9	527.601	-0.909634	0.316515	-2.8739	0.00405433	0.356761	FHDC1
ENSG00000213253.5	19.3298	1.3119	0.458582	2.86078	0.00422594	0.356761	RPL12P42
ENSG00000249437.8	59.8329	-0.725058	0.252488	-2.87165	0.00408331	0.356761	NAIP
ENSG00000214460.3	28.0295	1.12846	0.395025	2.85667	0.00428112	0.359855	TPT1P6
ENSG00000275302.2	435.156	-1.21975	0.427831	-2.85101	0.004358	0.364738	CCL4
ENSG00000188760.11	65.2312	1.13889	0.40248	2.82967	0.0046596	0.366066	TMEM198
ENSG00000145901.16	2515.81	-0.395896	0.139461	-2.83876	0.00452893	0.366066	TNIP1
ENSG00000181577.16	570.063	-1.08252	0.38039	-2.84583	0.00442958	0.366066	C6orf223
ENSG00000125735.11	71.5976	-0.835974	0.294833	-2.83541	0.0045767	0.366066	TNFSF14
ENSG00000153404.14	9.45209	1.91354	0.67642	2.82892	0.00467051	0.366066	PLEKHG4B
ENSG00000224607.4	12.327	-2.27693	0.804581	-2.82996	0.00465541	0.366066	IGKV1D-27
ENSG00000158764.7	21.2753	2.58427	0.913627	2.82858	0.00467551	0.366066	ITLN2
ENSG00000006534.16	709.248	0.598744	0.211347	2.83299	0.00461144	0.366066	ALDH3B1
ENSG00000255823.5	212.118	1.21086	0.426365	2.83996	0.00451197	0.366066	MTRNR2L8
ENSG00000099954.18	39.4545	1.85905	0.653513	2.8447	0.00444534	0.366066	CECR2
ENSG00000048028.11	809.621	-0.421262	0.148658	-2.83376	0.00460036	0.366066	USP28
ENSG00000164941.14	2172.75	0.563205	0.198973	2.83056	0.00464671	0.366066	INTS8
ENSG00000197157.11	6507.92	0.477966	0.168837	2.83094	0.00464119	0.366066	SND1
ENSG00000165322.18	2165.34	0.369205	0.129969	2.84072	0.00450119	0.366066	ARHGAP12
ENSG00000099992.16	163.955	0.329128	0.116341	2.82899	0.00466945	0.366066	TBC1D10A
ENSG00000163472.19	142.487	0.671758	0.236075	2.84553	0.00443378	0.366066	TMEM79
ENSG00000180828.3	53.4452	-0.876412	0.310102	-2.8262	0.00471033	0.367311	BHLHE22
ENSG00000147789.15	681.154	0.479984	0.170862	2.80918	0.00496672	0.368054	ZNF7
ENSG00000105254.12	1430.73	0.466432	0.165249	2.82259	0.00476368	0.368054	TBCB
ENSG00000211968.3	51.0739	-1.71812	0.612276	-2.80612	0.0050142	0.368054	IGHV1-58
ENSG00000161643.13	11.5312	-1.28072	0.454103	-2.82033	0.00479746	0.368054	SIGLEC16
ENSG00000066294.15	745.733	-0.944153	0.336677	-2.80433	0.0050421	0.368054	CD84
ENSG00000147548.17	2650.96	0.564794	0.200395	2.81841	0.00482622	0.368054	NSD3
ENSG00000164418.21	21.0055	1.24577	0.443798	2.80706	0.00499967	0.368054	GRIK2
ENSG00000158485.11	11.9811	-1.503	0.535775	-2.80528	0.00502729	0.368054	CD1B
ENSG00000151846.8	86.8101	0.889087	0.31563	2.81686	0.00484951	0.368054	PABPC3
ENSG00000226174.7	13.981	1.01572	0.360358	2.81865	0.00482264	0.368054	TEX22
ENSG00000007216.15	82.9972	-2.43776	0.86898	-2.80531	0.00502675	0.368054	SLC13A2
ENSG00000250155.2	13.2541	-1.42246	0.50683	-2.80658	0.00500708	0.368054	AC008957.1
ENSG00000233922.3	27.9395	-2.02942	0.722209	-2.81003	0.00495376	0.368054	LINC01694
ENSG00000197471.12	207.489	-0.917418	0.325559	-2.81797	0.00483278	0.368054	SPN
ENSG00000250337.7	97.4078	-3.58892	1.27441	-2.81614	0.00486048	0.368054	PURPL
ENSG00000160255.18	1154.98	-0.924774	0.329229	-2.80891	0.00497097	0.368054	ITGB2
ENSG00000240463.1	16.4963	0.748408	0.266101	2.8125	0.00491586	0.368054	RPS19P3
ENSG00000129450.8	89.1498	-0.869838	0.310323	-2.80301	0.0050628	0.368181	SIGLEC9
ENSG00000167964.13	114.651	-1.75252	0.626665	-2.79659	0.00516455	0.369081	RAB26
ENSG00000185250.16	89.0079	0.822919	0.294302	2.79617	0.0051712	0.369081	PPIL6
ENSG00000213654.10	402.232	-0.527898	0.188869	-2.79505	0.00518922	0.369081	GPSM3
ENSG00000287626.1	28.2614	-1.49557	0.534761	-2.79671	0.00516255	0.369081	AL021978.1
ENSG00000128266.9	73.7148	0.783543	0.28027	2.79567	0.00517919	0.369081	GNAZ
ENSG00000083782.8	174.492	-2.31638	0.82712	-2.80054	0.00510168	0.369081	EPYC
ENSG00000166228.9	2258.28	0.437357	0.156678	2.79144	0.00524735	0.371853	PCBD1
ENSG00000160883.11	190.502	-0.963119	0.345377	-2.7886	0.00529363	0.373769	HK3
ENSG00000180071.20	107.881	0.832626	0.299377	2.7812	0.00541587	0.378273	ANKRD18A
ENSG00000245750.10	74.6914	-1.6156	0.580443	-2.78339	0.00537943	0.378273	DRAIC
ENSG00000137841.12	334.543	-0.73174	0.263018	-2.78209	0.00540096	0.378273	PLCB2
ENSG00000110324.11	658.534	-0.775353	0.279535	-2.77373	0.0055418	0.379106	IL10RA
ENSG00000243566.7	10.4318	0.935417	0.338404	2.7642	0.00570622	0.379106	UPK3B
ENSG00000104529.17	2805.73	0.472701	0.170218	2.77704	0.00548564	0.379106	EEF1D
ENSG00000240563.2	1383.12	-2.39396	0.865681	-2.76541	0.00568516	0.379106	L1TD1
ENSG00000085719.13	4998.74	0.508081	0.184377	2.75566	0.00585734	0.379106	CPNE3
ENSG00000092758.18	585.704	1.91059	0.688038	2.77687	0.00548856	0.379106	COL9A3
ENSG00000143443.10	92.571	0.536702	0.194162	2.76419	0.00570639	0.379106	C1orf56
ENSG00000125531.7	19.9043	1.20572	0.437182	2.75793	0.00581688	0.379106	FNDC11
ENSG00000241886.1	18.6548	-0.947706	0.343912	-2.75567	0.00585726	0.379106	AC112496.1
ENSG00000100373.10	28.2426	1.87975	0.680255	2.76331	0.00572192	0.379106	UPK3A
ENSG00000100368.14	534.811	-0.783941	0.284273	-2.7577	0.00582088	0.379106	CSF2RB
ENSG00000184564.11	368.56	1.88516	0.682589	2.76178	0.00574864	0.379106	SLITRK6
ENSG00000071073.13	2226.75	-0.40706	0.1466	-2.77667	0.00549197	0.379106	MGAT4A
ENSG00000237441.10	923	0.528763	0.190852	2.77055	0.00559624	0.379106	RGL2
ENSG00000225523.2	39.8326	-2.00023	0.725182	-2.75825	0.00581124	0.379106	IGKV6D-21
ENSG00000163249.13	497.558	-0.360288	0.130159	-2.76806	0.00563903	0.379106	CCNYL1
ENSG00000100078.4	57.1583	-2.8949	1.0479	-2.76258	0.0057347	0.379106	PLA2G3
ENSG00000139438.6	152.231	1.0689	0.38518	2.77507	0.00551895	0.379106	FAM222A
ENSG00000169756.16	1713.21	-0.37787	0.136544	-2.76738	0.0056509	0.379106	LIMS1
ENSG00000240541.3	14.3619	1.14882	0.416865	2.75585	0.00585403	0.379106	TM4SF1-AS1
ENSG00000102890.16	847.15	0.415415	0.150171	2.76628	0.00566994	0.379106	ELMO3
ENSG00000163874.11	785.82	-0.833024	0.30215	-2.75699	0.00583361	0.379106	ZC3H12A
ENSG00000178531.6	30.9593	1.14929	0.417664	2.75171	0.00592842	0.379138	CTXN1
ENSG00000178796.13	24.8528	-2.07757	0.755294	-2.75068	0.00594725	0.379138	RIIAD1
ENSG00000231170.7	15.5939	1.0571	0.384137	2.75188	0.0059255	0.379138	AC002451.1
ENSG00000012061.16	891.889	0.356496	0.129533	2.75216	0.00592043	0.379138	ERCC1
ENSG00000179632.10	2155.24	0.440161	0.160046	2.75022	0.00595546	0.379138	MAF 1.00
ENSG00000151320.11	160.899	0.731875	0.267999	2.73089	0.00631632	0.379321	AKAP6
ENSG00000110756.18	670.395	-0.326567	0.11926	-2.73827	0.00617636	0.379321	HPS5
ENSG00000143862.8	693.858	0.34544	0.125802	2.74591	0.00603436	0.379321	ARL8A
ENSG00000106089.12	143.82	0.600988	0.220071	2.73088	0.00631647	0.379321	STX1A
ENSG00000162241.12	127.383	-0.632237	0.230129	-2.74732	0.00600853	0.379321	SLC25A45
ENSG00000102760.13	447.32	0.912107	0.333975	2.73107	0.00631299	0.379321	RGCC
ENSG00000100351.17	108.581	-0.85552	0.313354	-2.7302	0.00632951	0.379321	GRAP2
ENSG00000234589.4	49.7365	0.966699	0.354059	2.73034	0.00632699	0.379321	AC125807.1
ENSG00000120162.10	667.405	-0.559673	0.2045	-2.73679	0.00620413	0.379321	MOB3B
ENSG00000286964.1	13.1458	-1.21367	0.443214	-2.73834	0.00617493	0.379321	AL136169.1
ENSG00000089041.17	75.5965	-1.03091	0.377429	-2.73139	0.00630673	0.379321	P2RX7
ENSG00000052802.13	2567.64	-0.738972	0.270636	-2.73051	0.00632374	0.379321	MSMO1
ENSG00000182185.18	174.155	0.41044	0.149413	2.74702	0.00601392	0.379321	RAD51B
ENSG00000144278.15	16.8821	1.65904	0.606051	2.73746	0.00619147	0.379321	GALNT13
ENSG00000173338.13	10.5201	1.40067	0.510396	2.74429	0.00606425	0.379321	KCNK7
ENSG00000287917.1	16.417	-0.809916	0.29656	-2.73103	0.00631358	0.379321	AP000944.7
ENSG00000164366.4	405.55	0.350156	0.127869	2.7384	0.00617386	0.379321	CCDC127
ENSG00000240376.1	154.3	0.939126	0.342122	2.74501	0.00605094	0.379321	AC010343.1
ENSG00000072778.20	4825.42	0.430051	0.156773	2.74314	0.00608545	0.379321	ACADVL
ENSG00000185420.19	497.141	0.436876	0.160242	2.72636	0.0064038	0.380892	SMYD3
ENSG00000035681.9	1319.93	0.348609	0.127939	2.72479	0.00643418	0.380892	NSMAF
ENSG00000213071.11	42.9991	0.938521	0.34436	2.7254	0.00642231	0.380892	LPAL2
ENSG00000267074.1	10.6953	-1.20453	0.441771	-2.7266	0.00639902	0.380892	AC015911.3
ENSG00000101958.14	71.5724	-2.57827	0.94697	-2.72265	0.00647604	0.381046	GLRA2
ENSG00000255733.6	16.0354	-1.32993	0.488461	-2.7227	0.00647515	0.381046	IFNG-AS1
ENSG00000210082.2	379736	0.863579	0.317587	2.71919	0.00654413	0.383889	MT-RNR2
ENSG00000169495.5	23.4634	-1.21926	0.448643	-2.71767	0.00657432	0.384191	HTRA4
ENSG00000138030.13	247.669	0.747856	0.275426	2.71527	0.00662213	0.384191	KHK
ENSG00000225416.1	10.9002	1.53255	0.564245	2.71611	0.0066054	0.384191	AC104843.1
ENSG00000282639.1	120.418	-2.63265	0.969685	-2.71496	0.00662841	0.384191	IGHV3-64D
ENSG00000114648.12	528.943	-0.325113	0.119831	-2.7131	0.00666567	0.3852	KLHL18
ENSG00000164935.6	25.4789	-1.43674	0.529781	-2.71196	0.00668872	0.385385	DCSTAMP
ENSG00000270084.2	20.5349	-0.571864	0.210959	-2.71078	0.00671254	0.385614	GAS5-AS1
ENSG00000176731.12	550.407	0.534978	0.198275	2.69817	0.00697227	0.386802	RBIS
ENSG00000104375.17	873.426	0.44952	0.166583	2.69848	0.00696567	0.386802	STK3
ENSG00000043591.6	15.4684	1.31841	0.48684	2.70809	0.0067671	0.386802	ADRB1
ENSG00000034152.19	954.125	-0.519204	0.19209	-2.70292	0.00687326	0.386802	MAP2K3
ENSG00000162383.13	135.723	-1.86401	0.690394	-2.69992	0.00693555	0.386802	SLC1A7
ENSG00000200087.1	28.26	0.83447	0.309134	2.69938	0.0069469	0.386802	SNORA73B
ENSG00000172243.18	394.01	-0.807559	0.2984	-2.7063	0.00680375	0.386802	CLEC7A
ENSG00000184669.9	55.0992	-0.6044	0.223582	-2.70326	0.00686622	0.386802	OR7E14P
ENSG00000108511.10	468.913	-0.996222	0.36908	-2.6992	0.00695059	0.386802	HOXB6
ENSG00000267554.1	14.068	-1.16063	0.429081	-2.70492	0.00683212	0.386802	AC015911.7
ENSG00000161249.21	540.742	1.42032	0.526163	2.69939	0.00694674	0.386802	DMKN
ENSG00000198216.12	14.1971	-1.15102	0.425999	-2.70192	0.006894	0.386802	CACNA1E
ENSG00000137462.9	621.565	-0.85811	0.318275	-2.69613	0.00701505	0.388066	TLR2
ENSG00000184060.11	222.806	-0.602854	0.223814	-2.69354	0.00706972	0.388853	ADAP2
ENSG00000008988.11	25162.9	0.566198	0.210498	2.6898	0.00714942	0.388853	RPS20
ENSG00000086205.18	81.0777	-0.687027	0.255025	-2.69396	0.00706077	0.388853	FOLH1
ENSG00000254470.3	554.336	-0.38956	0.144793	-2.69046	0.00713527	0.388853	AP5B1
ENSG00000164691.18	237.368	-0.900522	0.334553	-2.69172	0.00710849	0.388853	TAGAP
ENSG00000211459.2	46146.3	0.84022	0.312235	2.69099	0.00712401	0.388853	MT-RNR1
ENSG00000204947.9	47.6489	0.726504	0.270487	2.68591	0.00723323	0.389383	ZNF425
ENSG00000172817.4	246.576	-0.739153	0.275155	-2.68632	0.00722439	0.389383	CYP7B1
ENSG00000257335.8	77.4915	-1.15285	0.429068	-2.68687	0.00721259	0.389383	MGAM
ENSG00000256045.3	13.243	1.33559	0.497328	2.68553	0.00724141	0.389383	MTRNR2L10
ENSG00000187037.8	27.8878	-0.958179	0.356903	-2.6847	0.00725945	0.389383	GPR141
ENSG00000248409.2	15.2625	1.71831	0.640303	2.68359	0.00728369	0.389607	AP000344.2
ENSG00000168961.17	1415.4	-0.642399	0.239508	-2.68217	0.00731471	0.390191	LGALS9
ENSG00000122035.7	428.525	-0.904999	0.337579	-2.68085	0.00734358	0.390658	RASL11A
ENSG00000136854.24	504.653	1.10727	0.413206	2.6797	0.00736885	0.390932	STXBP1
ENSG00000005844.19	241.488	-0.938483	0.350501	-2.67754	0.00741642	0.391317	ITGAL
ENSG00000177000.13	454.895	-0.496955	0.185557	-2.67818	0.00740233	0.391317	MTHFR
ENSG00000144596.13	61.402	-1.17569	0.439429	-2.67551	0.00746164	0.39227	GRIP2
ENSG00000174939.11	112.716	0.770813	0.288164	2.67491	0.00747489	0.39227	ASPHD1
ENSG00000084207.18	11841.3	0.464728	0.173914	2.67217	0.00753633	0.392794	GSTP1
ENSG00000109205.16	217.316	1.72111	0.643886	2.67301	0.0075174	0.392794	ODAM
ENSG00000117009.12	47.6775	-0.841234	0.314862	-2.67176	0.00754555	0.392794	KMO
ENSG00000183309.12	1150.17	0.551491	0.206603	2.66933	0.00760039	0.393538	ZNF623
ENSG00000085741.13	416.457	2.13805	0.800741	2.67009	0.00758298	0.393538	WNT11
ENSG00000230124.8	979.812	0.318922	0.119529	2.66817	0.00762668	0.393849	ACBD6
ENSG00000188015.10	60.2922	0.962393	0.360849	2.66703	0.00765257	0.394138	S100A3
ENSG00000275183.2	204.967	0.596511	0.223973	2.66332	0.00773747	0.396314	LENG9
ENSG00000283646.2	30.6347	-1.58488	0.596132	-2.65861	0.00784645	0.396314	LINC02009
ENSG00000186517.14	642.999	-0.692249	0.260429	-2.65811	0.0078581	0.396314	ARHGAP30
ENSG00000155629.15	1097.17	-0.750864	0.282346	-2.65938	0.00782846	0.396314	PIK3AP1
ENSG00000054967.13	167.221	-0.502374	0.18885	-2.66017	0.00781017	0.396314	RELT
ENSG00000067715.14	220.171	1.52169	0.572339	2.65872	0.00784375	0.396314	SYT1
ENSG00000179344.16	2957.9	-1.14924	0.431985	-2.66037	0.00780545	0.396314	HLA-DQB1
ENSG00000159450.12	17.9225	1.44443	0.542959	2.6603	0.00780716	0.396314	TCHH
ENSG00000116106.12	319.282	1.1559	0.435399	2.6548	0.00793545	0.39712	EPHA4
ENSG00000186448.15	644.455	-0.273397	0.102923	-2.65634	0.00789938	0.39712	ZNF197
ENSG00000214612.3	35.4432	0.819729	0.308674	2.65564	0.0079157	0.39712	RPS19P1
ENSG00000282890.1	27.6929	-2.66772	1.00691	-2.64943	0.00806282	0.399731	AC009975.1
ENSG00000149541.10	597.198	-0.366355	0.138252	-2.64991	0.00805128	0.399731	B3GAT3
ENSG00000244575.3	520.637	-1.30646	0.492844	-2.65086	0.00802875	0.399731	IGKV1-27
ENSG00000226121.2	29.0041	0.603357	0.227757	2.64913	0.00806996	0.399731	AHCTF1P1
ENSG00000165912.16	342.911	0.984534	0.371827	2.64783	0.00810108	0.400251	PACSIN3
ENSG00000198521.12	279.289	-0.991654	0.375469	-2.64111	0.0082636	0.400492	ZNF43
ENSG00000231298.7	22.3148	1.58739	0.600524	2.64334	0.00820926	0.400492	MANCR
ENSG00000164488.12	26.949	1.81688	0.688223	2.63996	0.00829159	0.400492	DACT2
ENSG00000019582.15	17025.4	-0.814347	0.30839	-2.64064	0.00827498	0.400492	CD74
ENSG00000274026.2	18.0913	0.777884	0.294554	2.64089	0.00826883	0.400492	FAM27E3
ENSG00000076344.16	54.4992	1.16241	0.439629	2.64407	0.00819166	0.400492	RGS11
ENSG00000266094.8	497.251	-0.672439	0.254663	-2.64051	0.00827814	0.400492	RASSF5
ENSG00000109158.11	20.4856	-1.88158	0.712429	-2.64107	0.00826439	0.400492	GABRA4
ENSG00000082497.12	194.074	0.991988	0.375233	2.64366	0.00820147	0.400492	SERTAD4
ENSG00000122756.15	34.3443	2.32717	0.882061	2.63833	0.00833147	0.40142	CNTFR
ENSG00000133740.11	438.235	0.495426	0.188088	2.63401	0.00843824	0.401582	E2F5
ENSG00000132698.15	3118.68	0.534584	0.2029	2.63471	0.00842082	0.401582	RAB25
ENSG00000172819.17	510.423	0.598993	0.227356	2.6346	0.00842353	0.401582	RARG
ENSG00000165168.8	2734.8	-0.862369	0.327269	-2.63505	0.00841252	0.401582	CYBB
ENSG00000215018.10	105.682	1.16261	0.441045	2.63604	0.00838788	0.401582	COL28A1
ENSG00000096996.16	129.358	-0.770546	0.293611	-2.62438	0.00868069	0.401979	IL12RB1
ENSG00000151365.2	7.33864	-2.1848	0.830804	-2.62974	0.00854496	0.401979	THRSP
ENSG00000182985.18	344.212	1.03926	0.395403	2.62837	0.00857961	0.401979	CADM1
ENSG00000161217.12	1416.61	-0.212718	0.0809586	-2.62749	0.00860177	0.401979	PCYT1A
ENSG00000177943.14	173.027	0.912934	0.347878	2.6243	0.00868284	0.401979	MAMDC4
ENSG00000249859.12	314.88	0.694282	0.265404	2.61594	0.00889819	0.401979	PVT1
ENSG00000198829.6	134.951	-0.984205	0.376255	-2.61579	0.00890205	0.401979	SUCNR1
ENSG00000088970.16	1069.52	1.19281	0.455825	2.61682	0.0088754	0.401979	KIZ
ENSG00000105792.19	215.922	0.588408	0.224698	2.61866	0.00882749	0.401979	CFAP69
ENSG00000173253.15	40.1219	-1.46605	0.559569	-2.61996	0.0087941	0.401979	DMRT2
ENSG00000163328.14	334.601	-0.87264	0.333378	-2.61757	0.00885581	0.401979	GPR155
ENSG00000110881.12	249.075	0.77085	0.294079	2.62124	0.00876115	0.401979	ASIC1
ENSG00000170091.11	15.5667	1.4928	0.568787	2.62453	0.00867685	0.401979	NSG2
ENSG00000213983.12	594.493	0.488681	0.186626	2.6185	0.00883169	0.401979	AP1G2
ENSG00000171951.5	200.285	1.17023	0.446344	2.62181	0.0087463	0.401979	SCG2
ENSG00000159261.12	14.1549	-1.36892	0.522306	-2.62091	0.00876954	0.401979	CLDN14
ENSG00000053524.12	21.5368	-0.648894	0.247871	-2.61787	0.00884813	0.401979	MCF2L2
ENSG00000280721.1	26.9089	-0.881117	0.335531	-2.62604	0.00863851	0.401979	LINC01943
ENSG00000176531.10	132.387	0.596223	0.226484	2.63252	0.00847547	0.401979	PHLDB3
ENSG00000154127.10	239.381	-0.804816	0.305793	-2.6319	0.00849097	0.401979	UBASH3B
ENSG00000182108.11	150.719	-0.548051	0.208931	-2.62313	0.00871272	0.401979	DEXI
ENSG00000186818.12	587.446	-1.04284	0.397916	-2.62075	0.00877365	0.401979	LILRB4
ENSG00000160219.12	114.404	-0.699078	0.267455	-2.61382	0.00895362	0.40337	GAB3
ENSG00000189157.14	87.9182	0.738535	0.282664	2.61276	0.00898134	0.403682	FAM47E
ENSG00000154447.15	908.755	-0.473313	0.181223	-2.61178	0.00900735	0.403916	SH3RF1
ENSG00000156427.8	39.1134	1.28183	0.491337	2.60886	0.0090845	0.405288	FGF18
ENSG00000170873.19	283.422	0.824597	0.316022	2.60931	0.00907262	0.405288	MTSS1
ENSG00000253704.2	15.4745	0.804488	0.308439	2.60825	0.00910056	0.405288	AC023632.2
ENSG00000231203.1	50.1833	0.892421	0.342451	2.60598	0.00916126	0.407058	KRT8P10
ENSG00000101198.15	13.4262	1.1029	0.42351	2.60419	0.00920928	0.407327	NKAIN4
ENSG00000253716.6	121.715	0.773407	0.296979	2.60425	0.00920766	0.407327	MINCR
ENSG00000121594.12	79.4777	-0.838168	0.322038	-2.6027	0.00924927	0.408166	CD80
ENSG00000007255.10	528.792	0.576644	0.221639	2.60173	0.00927548	0.408395	TRAPPC6A
ENSG00000170542.6	636.691	-0.562581	0.216332	-2.60054	0.00930778	0.40889	SERPINB9
ENSG00000183808.11	839.153	0.375232	0.144411	2.59837	0.00936683	0.410555	RBM12B
ENSG00000002745.13	9.33804	1.34063	0.516396	2.59612	0.00942831	0.411765	WNT16
ENSG00000010610.10	727.924	-0.771585	0.297243	-2.59581	0.00943685	0.411765	CD4
ENSG00000102854.16	667.679	1.53631	0.592543	2.59274	0.00952152	0.4136	MSLN
ENSG00000107890.17	509.641	0.384853	0.148423	2.59294	0.00951588	0.4136	ANKRD26
ENSG00000236439.4	66.0788	0.71962	0.278025	2.58833	0.0096442	0.415881	AC099336.2
ENSG00000235890.2	18.0149	1.8861	0.728421	2.5893	0.00961705	0.415881	TSPEAR-AS1
ENSG00000184916.9	426.391	0.989122	0.382566	2.58549	0.00972395	0.415881	JAG2
ENSG00000215246.5	18.9918	1.17247	0.453442	2.58571	0.00971799	0.415881	AC116351.1
ENSG00000136689.19	932.529	-1.20154	0.464709	-2.58557	0.00972192	0.415881	IL1RN
ENSG00000181097.5	11.1323	0.836213	0.32306	2.58841	0.00964194	0.415881	LINC02878
ENSG00000111012.10	82.7679	-0.73535	0.284257	-2.58692	0.00968376	0.415881	CYP27B1
ENSG00000274372.5	11.3558	-1.12025	0.434471	-2.57841	0.00992554	0.416105	LINC02804
ENSG00000158560.14	41.6831	1.05857	0.410854	2.5765	0.00998068	0.416105	DYNC1I1
ENSG00000187134.14	173.54	0.919887	0.356964	2.57698	0.00996688	0.416105	AKR1C1
ENSG00000250182.3	444.924	1.00652	0.390682	2.57632	0.00998578	0.416105	EEF1A1P13
ENSG00000070269.14	714.924	0.402622	0.155914	2.58234	0.00981325	0.416105	TMEM260
ENSG00000172893.16	1218.85	-0.644311	0.249841	-2.57889	0.00991195	0.416105	DHCR7
ENSG00000196208.14	32.1047	-0.743518	0.288264	-2.57929	0.0099003	0.416105	GREB1
ENSG00000168062.10	547.297	-0.776373	0.300762	-2.58135	0.00984146	0.416105	BATF2
ENSG00000167526.14	37961.8	0.483458	0.187563	2.57758	0.00994956	0.416105	RPL13
ENSG00000134109.11	1542.43	-0.442106	0.171088	-2.58408	0.00976383	0.416105	EDEM1
ENSG00000142512.15	136.283	-0.732693	0.284133	-2.5787	0.00991735	0.416105	SIGLEC10
ENSG00000187954.13	889.574	0.485397	0.188409	2.5763	0.00998634	0.416105	CYHR1
ENSG00000137752.24	1511.26	-0.891794	0.346527	-2.57352	0.010067	0.417842	CASP1
ENSG00000106327.13	85.433	1.11566	0.433538	2.57338	0.0100711	0.417842	TFR2
ENSG00000197893.14	12.4647	2.11863	0.82397	2.57124	0.0101334	0.418639	NRAP
ENSG00000186526.13	10.0962	2.54568	0.989899	2.57165	0.0101214	0.418639	CYP4F8
ENSG00000272498.1	11.6598	-0.816618	0.317715	-2.57028	0.0101616	0.418914	AC090948.2
ENSG00000142583.18	132.947	-0.903864	0.351948	-2.56818	0.0102235	0.419783	SLC2A5
ENSG00000227542.1	16.4813	-0.925811	0.360813	-2.5659	0.0102908	0.419783	AC092614.1
ENSG00000242173.10	19.8603	1.73134	0.674297	2.56763	0.0102397	0.419783	ARHGDIG
ENSG00000125337.19	14.4214	-1.50219	0.585232	-2.56683	0.0102634	0.419783	KIF25
ENSG00000150054.18	919.076	0.671812	0.261804	2.56609	0.0102853	0.419783	MPP7
ENSG00000178773.15	520.835	1.19321	0.465508	2.56324	0.01037	0.421694	CPNE7
ENSG00000235770.6	10.8642	-1.54796	0.604506	-2.5607	0.0104462	0.421694	LINC00607
ENSG00000100055.21	410.358	-0.696778	0.272054	-2.56118	0.0104317	0.421694	CYTH4
ENSG00000232995.7	35.5552	0.524846	0.204827	2.56239	0.0103955	0.421694	RGS5
ENSG00000047648.23	219.558	1.04668	0.408614	2.56155	0.0104206	0.421694	ARHGAP6
ENSG00000100288.20	10.0285	0.760434	0.29711	2.55944	0.0104841	0.422345	CHKB
ENSG00000089327.15	1418.31	0.698366	0.27294	2.55868	0.0105071	0.422394	FXYD5
ENSG00000119703.15	106.374	0.489473	0.191374	2.55768	0.0105374	0.422738	ZC2HC1C
ENSG00000108798.9	172.166	-0.570461	0.22335	-2.55411	0.0106459	0.425331	ABI3
ENSG00000110680.13	16.7471	-2.49612	0.977159	-2.55447	0.010635	0.425331	CALCA
ENSG00000232000.3	34.0367	-1.02028	0.399981	-2.55082	0.0107471	0.425871	CLCN3P1
ENSG00000100336.17	410.756	-0.816334	0.319886	-2.55196	0.010712	0.425871	APOL4
ENSG00000155760.2	315.657	0.954015	0.373922	2.55137	0.0107299	0.425871	FZD7
ENSG00000228594.4	92.8434	1.06547	0.417572	2.55158	0.0107237	0.425871	FNDC10
ENSG00000124343.14	16.0665	-1.09363	0.428915	-2.54976	0.0107798	0.426295	XG
ENSG00000232888.4	173.665	0.645761	0.253434	2.54804	0.0108329	0.427526	RPS11P5
ENSG00000147813.16	704.174	0.607017	0.238487	2.54528	0.0109189	0.430044	NAPRT
ENSG00000210144.1	18.0378	1.20944	0.475375	2.54419	0.0109533	0.430526	MT-TY
ENSG00000004478.8	3344.55	0.368917	0.145138	2.54184	0.011027	0.430912	FKBP4
ENSG00000175544.14	47.9935	-1.18803	0.4673	-2.54232	0.011012	0.430912	CABP4
ENSG00000107951.15	724.523	0.445476	0.175263	2.54176	0.0110297	0.430912	MTPAP
ENSG00000128567.17	1557.13	0.572948	0.22558	2.53989	0.0110888	0.432352	PODXL
ENSG00000240371.1	16.3958	0.836302	0.3294	2.53887	0.0111212	0.432746	RPS4XP13
ENSG00000066336.12	332.344	-0.715613	0.282678	-2.53155	0.0113558	0.433182	SPI1
ENSG00000171425.10	380.494	0.443398	0.175005	2.53364	0.0112886	0.433182	ZNF581
ENSG00000136286.16	231.079	-0.724618	0.286088	-2.53285	0.0113138	0.433182	MYO1G
ENSG00000286733.1	12.335	1.95849	0.773125	2.53322	0.0113021	0.433182	LINC02348
ENSG00000171813.14	411.786	0.522054	0.206271	2.53091	0.0113766	0.433182	PWWP2B
ENSG00000188130.14	144.182	0.97406	0.384144	2.53566	0.0112235	0.433182	MAPK12
ENSG00000144724.20	1029.51	-0.358028	0.141141	-2.53667	0.0111913	0.433182	PTPRG
ENSG00000189067.13	3542.04	-0.291606	0.115263	-2.52992	0.0114088	0.433182	LITAF
ENSG00000103522.16	66.4251	-0.908177	0.35865	-2.53221	0.0113345	0.433182	IL21R
ENSG00000267530.3	36.9498	1.10739	0.437469	2.53135	0.0113623	0.433182	LINC01836
ENSG00000104472.10	729.52	0.379999	0.150227	2.5295	0.0114224	0.433182	CHRAC1
ENSG00000103351.13	411.66	0.390109	0.15418	2.53022	0.0113992	0.433182	CLUAP1
ENSG00000007264.15	56.6771	-0.980271	0.387259	-2.5313	0.011364	0.433182	MATK
ENSG00000203867.8	27.5614	1.41833	0.560909	2.52863	0.0114507	0.433408	RBM20
ENSG00000253755.1	1441.89	-2.24342	0.887457	-2.52792	0.0114739	0.433442	IGHGP
ENSG00000258791.9	19.4674	1.60182	0.633824	2.52723	0.0114966	0.433457	LINC00520
ENSG00000211964.3	467.715	-1.24827	0.494575	-2.52393	0.0116052	0.435016	IGHV3-48
ENSG00000233017.3	22.898	1.44167	0.571053	2.52459	0.0115833	0.435016	AL121832.1
ENSG00000164983.7	818.236	0.518839	0.205499	2.52477	0.0115772	0.435016	TMEM65
ENSG00000118898.16	657.485	0.892709	0.353929	2.52228	0.0116597	0.435452	PPL
ENSG00000049768.16	75.3871	-0.859747	0.340902	-2.52198	0.0116698	0.435452	FOXP3
ENSG00000213862.4	55.7729	0.541104	0.214592	2.52154	0.0116841	0.435452	AC044787.1
ENSG00000058335.16	33.056	-1.35519	0.537846	-2.51966	0.0117468	0.436948	RASGRF1
ENSG00000189190.10	780.649	0.502013	0.199354	2.51819	0.0117959	0.4371	ZNF600
ENSG00000140450.9	1060.47	-0.503829	0.20006	-2.5184	0.0117891	0.4371	ARRDC4
ENSG00000231609.7	15.6585	0.715414	0.284397	2.51555	0.0118848	0.437819	AC007098.1
ENSG00000104894.12	208.171	-0.812783	0.323183	-2.51493	0.0119055	0.437819	CD37
ENSG00000196743.9	1892.08	-0.408405	0.162315	-2.51612	0.0118655	0.437819	GM2A
ENSG00000196209.13	97.3308	-0.847094	0.336696	-2.5159	0.0118728	0.437819	SIRPB2
ENSG00000228834.1	11.437	1.04678	0.416481	2.5134	0.0119575	0.4389	ATP5MFP2
ENSG00000204610.13	614.832	-0.61465	0.244616	-2.51271	0.0119808	0.438925	TRIM15
ENSG00000109929.10	1917.88	-0.517099	0.205928	-2.51106	0.0120368	0.439706	SC5D
ENSG00000203497.2	27.994	-0.492387	0.196111	-2.51075	0.0120474	0.439706	PDCD4-AS1
ENSG00000185567.7	742.76	1.08757	0.433422	2.50927	0.012098	0.440727	AHNAK2
ENSG00000206432.4	25.894	-0.893859	0.356405	-2.50798	0.0121422	0.441508	TMEM200C
ENSG00000115884.11	4397.08	0.530298	0.211918	2.50238	0.0123363	0.444404	SDC1
ENSG00000136040.9	736.358	-0.597513	0.238536	-2.50492	0.0122479	0.444404	PLXNC1
ENSG00000187583.11	65.2946	0.784188	0.313371	2.50243	0.0123346	0.444404	PLEKHN1
ENSG00000185989.11	605.083	0.583192	0.23301	2.50287	0.0123192	0.444404	RASA3
ENSG00000236383.8	24.0012	-0.72086	0.287898	-2.50388	0.0122841	0.444404	CCDC200
ENSG00000129993.15	66.0382	-1.27962	0.511701	-2.50072	0.0123941	0.444875	CBFA2T3
ENSG00000214870.9	38.5988	0.790874	0.316344	2.50005	0.0124177	0.444875	AC004540.1
ENSG00000105697.9	10.7159	-1.31907	0.527864	-2.49889	0.0124585	0.444875	HAMP
ENSG00000166840.13	65.382	-1.69881	0.67987	-2.49873	0.0124639	0.444875	GLYATL1
ENSG00000185215.11	1020.31	-0.684312	0.273756	-2.49971	0.0124294	0.444875	TNFAIP2
ENSG00000115255.12	281.51	0.972339	0.389464	2.49661	0.0125387	0.446722	REEP6
ENSG00000139679.15	858.21	-0.596722	0.239087	-2.49584	0.012566	0.446877	LPAR6
ENSG00000161955.16	150.697	-0.546979	0.219254	-2.49472	0.0126055	0.447462	TNFSF13
ENSG00000211972.2	74.4802	-1.41639	0.568252	-2.49255	0.0126831	0.449394	IGHV3-66
ENSG00000149418.11	7914.07	-0.485077	0.194675	-2.49173	0.0127123	0.449559	ST14
ENSG00000177839.7	47.6392	-1.18216	0.474548	-2.49112	0.0127341	0.449559	PCDHB9
ENSG00000118690.13	138.238	0.619978	0.249133	2.48854	0.0128268	0.450419	ARMC2
ENSG00000253972.6	14.1811	0.930771	0.373924	2.4892	0.0128031	0.450419	MAL2-AS1
ENSG00000158517.15	84.1131	-0.72361	0.290781	-2.48851	0.012828	0.450419	NCF1
ENSG00000228624.7	37.1495	0.90099	0.362654	2.48443	0.0129759	0.454788	HDAC2-AS2
ENSG00000105810.10	2077.84	0.522196	0.210379	2.48216	0.0130588	0.45687	CDK6
ENSG00000174527.10	9.40642	-1.09451	0.441403	-2.47962	0.0131524	0.459316	MYO1H
ENSG00000169896.18	322.458	-0.893508	0.360673	-2.47734	0.0132367	0.46143	ITGAM
ENSG00000138755.6	3062.15	-1.40843	0.568798	-2.47615	0.0132808	0.462138	CXCL9
ENSG00000261520.5	5.07255	-2.6986	1.09043	-2.47479	0.0133313	0.46224	DLGAP1-AS5
ENSG00000102580.15	3432.25	-0.368191	0.148743	-2.47535	0.0133104	0.46224	DNAJC3
ENSG00000006016.11	17.1481	0.873452	0.353147	2.47334	0.0133857	0.462983	CRLF1
ENSG00000227939.1	124.462	0.798144	0.32275	2.47295	0.0134004	0.462983	RPL3P2
ENSG00000126882.13	162.365	-0.613215	0.248189	-2.47076	0.0134827	0.464996	FAM78A
ENSG00000047365.12	1217.74	0.445001	0.180212	2.46932	0.013537	0.465218	ARAP2
ENSG00000175426.11	249.832	-1.7487	0.708162	-2.46935	0.013536	0.465218	PCSK1
ENSG00000120215.10	18.4784	-0.677618	0.274536	-2.46823	0.0135782	0.465809	MLANA
ENSG00000082074.19	643.371	-0.754825	0.305912	-2.46746	0.0136077	0.465998	FYB1
ENSG00000158806.14	39.0418	1.08901	0.441474	2.46675	0.0136346	0.466098	NPM2
ENSG00000253234.1	14.2597	-1.64274	0.666521	-2.46465	0.0137146	0.468008	IGLV2-5
ENSG00000277632.2	68.9031	-1.22318	0.496589	-2.46317	0.0137715	0.469126	CCL3
ENSG00000123405.14	23.5557	1.02982	0.418747	2.4593	0.0139207	0.473378	NFE2
ENSG00000125746.18	996.973	0.487998	0.198604	2.45714	0.0140048	0.475403	EML2
ENSG00000115504.15	1002.31	0.403872	0.164438	2.45607	0.0140465	0.475989	EHBP1
ENSG00000287569.1	11.139	-1.18287	0.484349	-2.44219	0.0145984	0.476399	AL078587.2
ENSG00000128268.12	230.836	1.04797	0.428303	2.4468	0.0144131	0.476399	MGAT3
ENSG00000101017.14	303.326	-0.755767	0.308778	-2.44761	0.0143808	0.476399	CD40
ENSG00000228358.6	15.7944	-2.11789	0.866918	-2.44301	0.0145655	0.476399	LINC02263
ENSG00000171234.14	141.415	1.20156	0.491903	2.44267	0.0145789	0.476399	UGT2B7
ENSG00000264456.1	26.102	-0.631789	0.25767	-2.45193	0.0142094	0.476399	AC138207.4
ENSG00000164690.8	525.095	1.11005	0.453343	2.44858	0.0143422	0.476399	SHH
ENSG00000170396.9	13.2459	-0.931741	0.380454	-2.44903	0.0143243	0.476399	ZNF804A
ENSG00000153029.14	624.699	-0.559924	0.22878	-2.44743	0.0143879	0.476399	MR1
ENSG00000143320.9	108.832	1.01372	0.414955	2.44297	0.014567	0.476399	CRABP2
ENSG00000118194.20	22.4305	-1.55711	0.636802	-2.44521	0.0144768	0.476399	TNNT2
ENSG00000277149.5	136.861	0.882297	0.359891	2.45157	0.0142236	0.476399	TYW1B
ENSG00000173137.12	333.513	0.512161	0.209629	2.44318	0.0145584	0.476399	ADCK5
ENSG00000198753.12	36.2347	1.11974	0.457172	2.44927	0.0143145	0.476399	PLXNB3
ENSG00000233680.4	11.4751	-1.23008	0.501526	-2.45268	0.0141796	0.476399	HNRNPA1P27
ENSG00000163719.20	843.805	-0.204762	0.0838122	-2.4431	0.0145617	0.476399	MTMR14
ENSG00000283787.2	39.8651	-0.780091	0.31923	-2.44366	0.0145391	0.476399	PRR33
ENSG00000102904.15	16.9892	0.769883	0.314529	2.44774	0.0143757	0.476399	TSNAXIP1
ENSG00000101916.12	207.905	-0.929413	0.379054	-2.45193	0.0142093	0.476399	TLR8
ENSG00000181036.14	22.8201	-0.987463	0.403938	-2.44459	0.0145018	0.476399	FCRL6
ENSG00000115085.14	115.472	-0.766399	0.312895	-2.44938	0.0143101	0.476399	ZAP70
ENSG00000268903.1	24.5217	-1.57489	0.644816	-2.44238	0.0145908	0.476399	AL627309.6
ENSG00000113615.13	1132.85	-0.302743	0.124093	-2.43964	0.0147017	0.47652	SEC24A
ENSG00000232176.1	39.7532	0.725297	0.29722	2.44027	0.0146764	0.47652	AL161909.1
ENSG00000177984.7	76.9394	-2.48941	1.02076	-2.43879	0.0147364	0.47652	LCN15
ENSG00000140030.6	182.101	-0.782229	0.320493	-2.4407	0.0146586	0.47652	GPR65
ENSG00000127947.16	3030.93	0.432937	0.17744	2.43991	0.0146908	0.47652	PTPN12
ENSG00000214960.11	90.1787	0.54072	0.221745	2.43847	0.0147494	0.47652	CRPPA
ENSG00000105373.19	6529.92	0.436514	0.179663	2.42963	0.0151143	0.485179	NOP53
ENSG00000188596.11	21.1572	-0.836224	0.344188	-2.42956	0.0151173	0.485179	CFAP54
ENSG00000206077.13	152.204	1.42935	0.588066	2.43059	0.0150744	0.485179	ZDHHC11B
ENSG00000213885.4	44.4835	0.705663	0.290275	2.43102	0.0150566	0.485179	RPL13AP7
ENSG00000112137.18	73.7676	-0.70227	0.289352	-2.42705	0.0152222	0.486268	PHACTR1
ENSG00000122986.14	66.1361	-0.515153	0.212315	-2.42636	0.015251	0.486268	HVCN1
ENSG00000241322.11	33.2284	-1.29168	0.532223	-2.42696	0.015226	0.486268	CDRT1
ENSG00000203972.10	1.01052	3.47981	1.43417	2.42635	0.0152514	0.486268	GLYATL3
ENSG00000181135.16	202.276	0.537006	0.221386	2.42566	0.0152807	0.486401	ZNF707
ENSG00000019169.10	179.522	-1.43218	0.590816	-2.42407	0.0153476	0.487733	MARCO
ENSG00000255833.2	20.5398	-1.07073	0.441861	-2.42322	0.0153837	0.487754	TIFAB
ENSG00000239855.1	476.467	-1.40076	0.578142	-2.42287	0.0153985	0.487754	IGKV1-6
ENSG00000102547.19	1101.79	1.24922	0.515803	2.42189	0.0154399	0.488267	CAB39L
ENSG00000248791.1	9.97412	-1.49178	0.616142	-2.42116	0.0154709	0.488454	AC010627.1
ENSG00000214541.3	25.916	1.07439	0.443981	2.4199	0.0155249	0.489361	RPS4XP3
ENSG00000136383.7	345.355	-1.49926	0.619753	-2.41913	0.0155579	0.489607	ALPK3
ENSG00000123329.20	195.813	-0.630549	0.260927	-2.41657	0.0156675	0.491231	ARHGAP9
ENSG00000164830.18	2208.71	0.465243	0.19253	2.41647	0.0156716	0.491231	OXR1
ENSG00000278857.1	49.826	-1.36168	0.563574	-2.41616	0.0156854	0.491231	IGKV1D-12
ENSG00000178826.11	156.659	0.759116	0.314453	2.41409	0.0157747	0.493234	TMEM139
ENSG00000130487.9	27.3565	-1.00555	0.41713	-2.41064	0.0159244	0.496973	KLHDC7B
ENSG00000101557.15	1895.26	-0.418818	0.17379	-2.40991	0.0159566	0.496973	USP14
ENSG00000157992.12	967.343	0.440895	0.182976	2.40958	0.0159711	0.496973	KRTCAP3
ENSG00000164953.16	302.51	0.461911	0.191783	2.4085	0.0160181	0.497638	TMEM67
ENSG00000270194.1	24.9814	-0.526099	0.218494	-2.40784	0.0160473	0.497748	AC097359.2
ENSG00000133519.12	86.3241	1.2013	0.499581	2.40461	0.0161897	0.501363	ZDHHC8P1
ENSG00000238062.6	19.994	-1.07709	0.448173	-2.4033	0.0162479	0.501859	SPATA3-AS1
ENSG00000120256.11	52.9972	0.53621	0.223134	2.40309	0.0162574	0.501859	LRP11
ENSG00000208772.1	10.6525	0.666385	0.277681	2.39983	0.0164029	0.504746	SNORD94
ENSG00000047410.14	5683.68	0.373722	0.155726	2.39988	0.0164005	0.504746	TPR
ENSG00000141576.16	295.75	0.889683	0.370859	2.39898	0.0164408	0.505111	RNF157
ENSG00000246763.7	133.532	-1.51807	0.634581	-2.39224	0.0167457	0.508662	RGMB-AS1
ENSG00000146592.17	193.619	-0.8454	0.353178	-2.3937	0.0166796	0.508662	CREB5
ENSG00000263520.1	14.3083	2.09138	0.873828	2.39336	0.0166949	0.508662	LINC02563
ENSG00000224520.2	53.1807	0.900172	0.376307	2.39212	0.0167512	0.508662	KRT8P45
ENSG00000278318.5	25.8915	0.750398	0.313737	2.3918	0.0167659	0.508662	ZNF229
ENSG00000090339.9	736.175	-0.77009	0.321751	-2.39344	0.0166914	0.508662	ICAM1
ENSG00000233493.4	181.8	0.610186	0.254954	2.39331	0.016697	0.508662	TMEM238
ENSG00000163110.15	2635.25	-0.440185	0.184	-2.3923	0.0167429	0.508662	PDLIM5
ENSG00000104231.11	1918.02	0.455814	0.190706	2.39014	0.0168418	0.509302	ZFAND1
ENSG00000237676.1	17.566	0.995986	0.416668	2.39036	0.0168318	0.509302	RPL30P4
ENSG00000133606.11	3947.55	0.316752	0.132553	2.38962	0.0168657	0.509302	MKRN1
ENSG00000171163.16	551.904	0.42358	0.177363	2.38821	0.0169308	0.510475	ZNF692
ENSG00000109686.19	3381.69	-0.373258	0.156363	-2.38713	0.0169806	0.511183	SH3D19
ENSG00000255521.2	10.5859	-1.05791	0.443377	-2.38604	0.0170311	0.511909	AL356215.1
ENSG00000135905.20	610.795	-0.624675	0.261963	-2.38459	0.0170983	0.513133	DOCK10
ENSG00000255197.6	72.9992	-0.726408	0.305021	-2.3815	0.0172423	0.515707	AC090559.1
ENSG00000251039.2	86.6019	-1.71012	0.718522	-2.38006	0.01731	0.515707	IGKV2D-40
ENSG00000128383.13	55.2122	-1.0034	0.42184	-2.37862	0.0173775	0.515707	APOBEC3A
ENSG00000134198.10	407.901	0.738489	0.3104	2.37915	0.0173527	0.515707	TSPAN2
ENSG00000182749.6	155.324	0.496918	0.209142	2.37599	0.0175021	0.515707	PAQR7
ENSG00000149289.11	420.081	-0.922209	0.387604	-2.37926	0.0173476	0.515707	ZC3H12C
ENSG00000003402.20	2727.33	-0.336266	0.141506	-2.37633	0.0174856	0.515707	CFLAR
ENSG00000163576.18	10.8773	0.969323	0.407763	2.37717	0.0174461	0.515707	EFHB
ENSG00000177410.13	878.673	0.494943	0.208142	2.37791	0.0174113	0.515707	ZFAS1
ENSG00000204577.11	166.225	-0.765844	0.322038	-2.37811	0.0174014	0.515707	LILRB3
ENSG00000135424.18	256.897	0.712854	0.300026	2.37597	0.0175027	0.515707	ITGA7
ENSG00000157368.11	91.0275	-0.755825	0.31811	-2.37599	0.0175021	0.515707	IL34
ENSG00000137970.7	713.685	0.762579	0.321038	2.37536	0.0175319	0.515784	RPL7P9
ENSG00000138152.10	25.3032	0.91686	0.38655	2.3719	0.0176968	0.516784	BTBD16
ENSG00000135097.7	32.1575	1.66478	0.702216	2.37075	0.0177522	0.516784	MSI1
ENSG00000155100.11	701.819	0.449671	0.189657	2.37097	0.0177416	0.516784	OTUD6B
ENSG00000232229.6	36.5585	-1.065	0.448595	-2.37408	0.0175928	0.516784	LINC00865
ENSG00000151948.12	23.1099	-0.911325	0.384281	-2.37151	0.0177157	0.516784	GLT1D1
ENSG00000105372.8	29609.7	0.536916	0.2264	2.37154	0.0177141	0.516784	RPS19
ENSG00000156482.11	10627.5	0.539113	0.227279	2.37203	0.0176904	0.516784	RPL30
ENSG00000112149.10	457.114	-0.635243	0.268176	-2.36875	0.0178483	0.518489	CD83
ENSG00000013725.14	180.025	-0.617784	0.260842	-2.36842	0.0178642	0.518489	CD6
ENSG00000104218.16	747.902	0.387618	0.163824	2.36607	0.0179781	0.521015	CSPP1
ENSG00000163599.17	158.039	-0.894147	0.378178	-2.36436	0.0180614	0.522577	CTLA4
ENSG00000101188.5	87.8602	1.63175	0.69059	2.36284	0.0181355	0.522577	NTSR1
ENSG00000174004.6	59.5937	-0.682694	0.28894	-2.36276	0.0181396	0.522577	NRROS
ENSG00000215845.11	638.576	0.481326	0.203692	2.36301	0.0181272	0.522577	TSTD1
ENSG00000092607.15	23.1949	-1.22981	0.521618	-2.35768	0.0183893	0.527423	TBX15
ENSG00000184613.11	161.722	1.33343	0.565304	2.35878	0.0183352	0.527423	NELL2
ENSG00000223803.1	101.704	0.714347	0.302964	2.35786	0.0183804	0.527423	RPS20P14
ENSG00000114923.17	50.9611	1.04259	0.442417	2.35658	0.0184441	0.528214	SLC4A3
ENSG00000230002.3	19.7615	0.812759	0.344994	2.35587	0.0184796	0.52845	ALMS1-IT1
ENSG00000176978.14	2001.81	0.494763	0.210086	2.35505	0.0185202	0.528833	DPP7
ENSG00000234694.1	22.5176	0.670972	0.285181	2.35279	0.0186331	0.530544	AL139289.1
ENSG00000160791.13	327.464	-0.780501	0.331739	-2.35276	0.0186348	0.530544	CCR5
ENSG00000179542.16	24.8282	-1.43076	0.608764	-2.35027	0.0187596	0.531782	SLITRK4
ENSG00000152128.13	49.4613	0.966626	0.411112	2.35125	0.0187105	0.531782	TMEM163
ENSG00000083067.23	15.0685	1.44085	0.613062	2.35026	0.0187604	0.531782	TRPM3
ENSG00000186715.11	36.0925	-1.02532	0.436473	-2.34909	0.0188192	0.532672	MST1L
ENSG00000287315.1	37.46	1.39162	0.592894	2.34717	0.0189167	0.534652	AL670729.3
ENSG00000198788.9	1989.97	-1.87419	0.798677	-2.34662	0.0189447	0.534665	MUC2
ENSG00000247081.8	91.6627	0.546731	0.233108	2.3454	0.0190066	0.534782	BAALC-AS1
ENSG00000078403.17	886.603	0.2229	0.0950569	2.34491	0.0190315	0.534782	MLLT10
ENSG00000164920.9	123.626	0.820732	0.34998	2.34508	0.0190229	0.534782	OSR2
ENSG00000267121.6	47.645	-0.664925	0.283873	-2.34234	0.0191634	0.535389	AC008105.3
ENSG00000154898.15	13.2377	-0.828593	0.353578	-2.34345	0.0191062	0.535389	CCDC144CP
ENSG00000188624.3	8.72124	-2.21699	0.946178	-2.3431	0.0191243	0.535389	IGFL3
ENSG00000285813.1	19.2865	-0.674613	0.287953	-2.34279	0.0191402	0.535389	AP000813.1
ENSG00000131263.13	1993.01	-0.307708	0.131515	-2.33971	0.0192986	0.536206	RLIM
ENSG00000236790.6	40.008	-0.791967	0.338331	-2.34081	0.0192421	0.536206	LINC00299
ENSG00000162129.14	401.159	-0.357977	0.152987	-2.33991	0.0192883	0.536206	CLPB
ENSG00000140678.17	568.666	-0.868759	0.371396	-2.33917	0.0193266	0.536206	ITGAX
ENSG00000072195.15	190.039	1.23146	0.526471	2.33909	0.0193307	0.536206	SPEG
ENSG00000172113.9	579.132	-0.328923	0.140654	-2.33852	0.0193601	0.536256	NME6
ENSG00000070718.12	720.462	0.436927	0.186886	2.33793	0.0193909	0.536342	AP3M2
ENSG00000187244.12	293.913	0.950358	0.406845	2.33592	0.0194953	0.537176	BCAM
ENSG00000072163.20	243.878	1.01644	0.435709	2.33283	0.0196571	0.537176	LIMS2
ENSG00000227053.1	10.5425	0.934054	0.4002	2.33397	0.0195974	0.537176	MUC12-AS1
ENSG00000255282.6	12.6512	-1.09174	0.468307	-2.33126	0.0197399	0.537176	WTAPP1
ENSG00000188452.14	28.6316	1.53332	0.657622	2.33162	0.0197209	0.537176	CERKL
ENSG00000011454.18	1657.01	0.311105	0.133359	2.33285	0.0196562	0.537176	RABGAP1
ENSG00000165269.13	106.045	0.986306	0.423315	2.32996	0.0198083	0.537176	AQP7
ENSG00000162511.8	2429.5	-0.69335	0.296777	-2.33626	0.0194775	0.537176	LAPTM5
ENSG00000169403.12	596.753	-0.676923	0.289828	-2.33561	0.0195117	0.537176	PTAFR
ENSG00000235173.7	723.62	0.393217	0.16871	2.33072	0.0197679	0.537176	HGH1
ENSG00000179388.9	174.708	-1.09145	0.468296	-2.33069	0.0197699	0.537176	EGR3
ENSG00000137225.13	10.4129	-0.835061	0.358333	-2.3304	0.019785	0.537176	CAPN11
ENSG00000232884.9	19.7297	-0.799929	0.343216	-2.33069	0.0197698	0.537176	AF127936.1
ENSG00000154319.16	111.252	0.996305	0.427004	2.33325	0.0196352	0.537176	FAM167A
ENSG00000115956.10	1419.54	-0.926018	0.397582	-2.32913	0.0198524	0.537622	PLEK
ENSG00000148498.16	1175.85	0.273686	0.11754	2.32845	0.0198884	0.537628	PARD3
ENSG00000110436.13	16.3958	-0.823266	0.353625	-2.32808	0.019908	0.537628	SLC1A2
ENSG00000226979.9	17.552	-0.769958	0.331101	-2.32545	0.0200481	0.538735	LTA
ENSG00000231113.2	34.3114	-0.52979	0.22793	-2.32436	0.0201063	0.538735	AL035587.1
ENSG00000177600.9	15580.4	0.357366	0.15376	2.32419	0.0201155	0.538735	RPLP2
ENSG00000233058.2	40.5089	-0.974958	0.419027	-2.32672	0.0199802	0.538735	LINC00884
ENSG00000171368.12	221.917	1.09171	0.469303	2.32624	0.020006	0.538735	TPPP
ENSG00000198382.9	564.461	-0.29687	0.127704	-2.32467	0.0200898	0.538735	UVRAG
ENSG00000228906.1	12.9539	-0.709233	0.305228	-2.32362	0.0201458	0.538803	AL353804.1
ENSG00000054965.11	907.245	-0.459808	0.197946	-2.3229	0.0201846	0.539098	FAM168A
ENSG00000172936.16	2014.91	-0.238836	0.103	-2.31881	0.0204055	0.54229	MYD88
ENSG00000148429.14	1201.43	0.38563	0.166285	2.31909	0.0203902	0.54229	USP6NL
ENSG00000197958.13	37869.2	0.50138	0.216122	2.3199	0.0203465	0.54229	RPL12
ENSG00000039139.9	49.4325	0.887606	0.382817	2.31862	0.0204158	0.54229	DNAH5
ENSG00000258227.7	257.148	-1.07777	0.464964	-2.31797	0.020451	0.54236	CLEC5A
ENSG00000064313.12	1542.89	0.369191	0.159303	2.31754	0.0204743	0.54236	TAF2
ENSG00000162711.18	143.537	-0.964592	0.416567	-2.31558	0.0205814	0.544453	NLRP3
ENSG00000104835.15	48.0968	0.385148	0.166535	2.31272	0.0207379	0.547102	SARS2
ENSG00000286162.2	33.4412	-0.579767	0.250663	-2.31294	0.020726	0.547102	AL162253.2
ENSG00000180758.12	549.293	0.555768	0.240629	2.30965	0.0209075	0.547855	GPR157
ENSG00000023330.15	1041.94	-0.427998	0.185294	-2.30984	0.0208971	0.547855	ALAS1
ENSG00000211752.3	10.4485	-0.979403	0.424015	-2.30983	0.0208976	0.547855	TRBV27
ENSG00000228887.3	36.8123	0.705323	0.305312	2.31017	0.0208787	0.547855	EEF1DP1
ENSG00000138073.14	1795.72	0.417109	0.180505	2.31079	0.0208444	0.547855	PREB
ENSG00000243055.1	27.9153	-0.876677	0.379685	-2.30896	0.0209458	0.54812	GK-AS1
ENSG00000120709.11	735.156	-0.294743	0.127785	-2.30655	0.0210801	0.55089	FAM53C
ENSG00000175463.12	154.673	-0.696586	0.302115	-2.3057	0.0211276	0.551389	TBC1D10C
ENSG00000162493.16	651.605	-0.601115	0.260935	-2.3037	0.0212397	0.552907	PDPN
ENSG00000261098.1	52.5869	-0.426996	0.185357	-2.30364	0.0212427	0.552907	AP000766.1
ENSG00000144802.11	1275.27	-0.650845	0.283153	-2.29856	0.0215298	0.554435	NFKBIZ
ENSG00000237438.7	14.2459	-1.09143	0.47428	-2.30123	0.0213787	0.554435	CECR7
ENSG00000230795.3	71.538	-1.18203	0.514212	-2.29873	0.0215204	0.554435	HLA-K
ENSG00000133657.16	4724.41	-0.280972	0.122105	-2.30106	0.0213882	0.554435	ATP13A3
ENSG00000112559.15	342.463	0.773643	0.336441	2.29949	0.021477	0.554435	MDFI
ENSG00000163219.12	278.9	-0.614996	0.267493	-2.29911	0.0214989	0.554435	ARHGAP25
ENSG00000186635.14	1187.85	-0.38949	0.169336	-2.3001	0.0214425	0.554435	ARAP1
ENSG00000164944.12	2292.65	0.334551	0.145529	2.29885	0.0215134	0.554435	VIRMA
ENSG00000117153.16	1626.14	0.324271	0.14115	2.29736	0.0215983	0.555463	KLHL12
ENSG00000213771.3	11.1603	1.05968	0.462076	2.29329	0.0218313	0.555696	KRT8P37
ENSG00000167476.10	93.9107	-1.25536	0.547663	-2.29221	0.0218936	0.555696	JSRP1
ENSG00000137757.11	181.685	-0.881433	0.384491	-2.29247	0.0218786	0.555696	CASP5
ENSG00000162897.16	64.196	-1.2098	0.527305	-2.2943	0.021773	0.555696	FCAMR
ENSG00000159079.19	191.319	0.338783	0.147619	2.29498	0.0217345	0.555696	CFAP298
ENSG00000072274.13	13382.2	-0.604635	0.263521	-2.29445	0.0217648	0.555696	TFRC
ENSG00000166106.3	82.599	-1.35144	0.589556	-2.2923	0.0218884	0.555696	ADAMTS15
ENSG00000171608.16	221.167	-0.647303	0.282257	-2.29331	0.0218302	0.555696	PIK3CD
ENSG00000267259.1	10.2949	1.29481	0.56399	2.2958	0.0216875	0.555696	ERVE-1
ENSG00000143217.9	291.206	0.76685	0.334041	2.29568	0.0216944	0.555696	NECTIN4
ENSG00000168297.16	496.652	-0.259394	0.113331	-2.28881	0.0220903	0.555901	PXK
ENSG00000245571.7	150.977	-0.384757	0.168023	-2.2899	0.022027	0.555901	FAM111A-DT
ENSG00000179041.4	577.495	0.428565	0.187381	2.28714	0.0221879	0.555901	RRS1
ENSG00000260588.1	21.0581	0.789655	0.34516	2.28779	0.0221497	0.555901	AC027702.1
ENSG00000103253.19	191.328	0.891701	0.38985	2.28729	0.0221786	0.555901	HAGHL
ENSG00000160932.11	2975.15	0.898668	0.39265	2.28873	0.0220953	0.555901	LY6E
ENSG00000271824.2	60.1358	-1.29139	0.56462	-2.28718	0.022185	0.555901	SMIM32
ENSG00000147654.15	1124.95	0.443914	0.193868	2.28977	0.0220345	0.555901	EBAG9
ENSG00000225031.1	108.486	0.581417	0.253921	2.28975	0.0220357	0.555901	EIF4BP7
ENSG00000287486.1	13.0602	-2.12559	0.928446	-2.28941	0.0220558	0.555901	AC114291.1
ENSG00000196371.3	1386.24	-0.56469	0.247031	-2.28591	0.0222594	0.556972	FUT4
ENSG00000175866.15	379.855	0.583916	0.255575	2.28472	0.0223294	0.557287	BAIAP2
ENSG00000151790.9	268.923	-0.959804	0.420038	-2.28504	0.0223104	0.557287	TDO2
ENSG00000115282.21	557.13	0.344264	0.150723	2.28409	0.0223663	0.557493	TTC31
ENSG00000134516.18	503.222	-0.666022	0.291745	-2.28289	0.0224368	0.558533	DOCK2
ENSG00000149177.13	1349.45	-0.416442	0.182466	-2.2823	0.0224715	0.55868	PTPRJ
ENSG00000225093.1	58.9726	0.613776	0.26904	2.28136	0.0225274	0.558976	RPL3P7
ENSG00000285938.1	15.7831	-1.15302	0.505459	-2.28113	0.022541	0.558976	AC072022.2
ENSG00000016402.13	886.535	0.599226	0.262778	2.28035	0.0225867	0.559396	IL20RA
ENSG00000277654.6	13.5009	0.70744	0.31044	2.27883	0.0226771	0.559492	AC087633.2
ENSG00000118113.12	40.1517	-1.63169	0.715747	-2.2797	0.0226253	0.559492	MMP8
ENSG00000241741.1	47.0493	0.518856	0.227645	2.27923	0.0226533	0.559492	RPL7AP30
ENSG00000185630.19	1188.25	0.711671	0.31237	2.27829	0.0227092	0.559574	PBX1
ENSG00000197766.8	403.832	0.899977	0.395199	2.27727	0.0227698	0.560188	CFD
ENSG00000144199.12	140.975	0.533523	0.234319	2.27691	0.0227918	0.560188	FAHD2B
ENSG00000112378.12	12266.2	0.542372	0.23853	2.27382	0.022977	0.560433	PERP
ENSG00000279369.1	24.1927	-0.613579	0.269861	-2.27369	0.0229848	0.560433	AC046185.3
ENSG00000175166.17	4067.62	-0.225177	0.0989465	-2.27575	0.0228611	0.560433	PSMD2
ENSG00000162722.9	65.2027	1.64837	0.724523	2.27511	0.0228994	0.560433	TRIM58
ENSG00000143224.18	278.411	0.375465	0.165007	2.27545	0.0228791	0.560433	PPOX
ENSG00000088881.21	75.642	0.66644	0.29315	2.27337	0.0230038	0.560433	EBF4
ENSG00000184937.16	51.0166	-1.56125	0.686378	-2.27463	0.0229283	0.560433	WT1
ENSG00000151413.17	551.931	0.498444	0.219452	2.27131	0.0231284	0.562763	NUBPL
ENSG00000246067.8	178.909	-0.503226	0.221727	-2.26958	0.023233	0.563232	RAB30-DT
ENSG00000254154.8	26.3253	0.898189	0.395839	2.26908	0.0232638	0.563232	CRYZL2P-SEC16B
ENSG00000236992.2	44.7133	0.823049	0.362684	2.26933	0.0232483	0.563232	RPL12P12
ENSG00000263884.1	10.0206	-0.787949	0.347212	-2.26936	0.0232463	0.563232	AP000845.1
ENSG00000256128.6	11.3064	-1.20631	0.531752	-2.26856	0.0232952	0.563292	LINC00944
ENSG00000137414.6	1479.48	-0.32586	0.143703	-2.26758	0.0233546	0.563692	FAM8A1
ENSG00000102524.11	340.676	-0.808268	0.356484	-2.26733	0.0233698	0.563692	TNFSF13B
ENSG00000175073.8	1176.94	0.33593	0.14821	2.26658	0.0234161	0.564106	VCPIP1
ENSG00000204967.12	8.45113	-1.53094	0.676183	-2.2641	0.0235681	0.565107	PCDHA4
ENSG00000077420.16	155.939	-0.760844	0.336019	-2.26429	0.0235566	0.565107	APBB1IP
ENSG00000170631.15	359.753	0.392613	0.173503	2.26286	0.023644	0.565107	ZNF16
ENSG00000095139.14	4086.44	-0.290751	0.128504	-2.26258	0.0236613	0.565107	ARCN1
ENSG00000249196.6	1.07195	4.38536	1.93761	2.26328	0.0236186	0.565107	TMEM132D-AS1
ENSG00000154144.13	755.373	-0.313985	0.13874	-2.26311	0.0236287	0.565107	TBRG1
ENSG00000164961.16	1916.85	0.354919	0.156846	2.26285	0.023645	0.565107	WASHC5
ENSG00000134470.21	352.65	-0.454821	0.201421	-2.25807	0.0239415	0.56779	IL15RA
ENSG00000074527.13	448.73	0.721172	0.31912	2.25988	0.0238289	0.56779	NTN4
ENSG00000128596.17	71.7904	0.789782	0.34959	2.25916	0.0238732	0.56779	CCDC136
ENSG00000007372.24	17.4988	-1.81235	0.802413	-2.25862	0.0239072	0.56779	PAX6
ENSG00000104936.19	277.176	0.572275	0.253416	2.25825	0.0239304	0.56779	DMPK
ENSG00000170677.6	1305.28	0.558176	0.247234	2.25768	0.0239654	0.56779	SOCS6
ENSG00000260855.1	20.7163	0.744826	0.329937	2.25748	0.0239784	0.56779	AL591848.3
ENSG00000148824.19	94.0465	0.408737	0.181132	2.25657	0.024035	0.568168	MTG1
ENSG00000184343.11	68.1777	0.957621	0.424569	2.25552	0.024101	0.568168	SRPK3
ENSG00000139977.14	1064.53	0.486936	0.215923	2.25514	0.0241245	0.568168	NAA30
ENSG00000160318.6	17.692	0.622531	0.276035	2.25527	0.0241166	0.568168	CLDND2
ENSG00000140043.11	51.8688	0.517253	0.229392	2.25488	0.0241406	0.568168	PTGR2
ENSG00000167536.14	54.2062	-0.555471	0.246452	-2.25387	0.0242043	0.568976	DHRS13
ENSG00000104490.18	344.044	-0.617095	0.274567	-2.24752	0.0246067	0.569979	NCALD
ENSG00000124107.5	1384.11	1.05989	0.47089	2.25082	0.0243972	0.569979	SLPI
ENSG00000142961.15	581.493	-0.233599	0.103756	-2.25144	0.0243579	0.569979	MOB3C
ENSG00000149792.9	1378.16	-0.309082	0.13757	-2.24672	0.0246579	0.569979	MRPL49
ENSG00000169330.9	53.9457	-0.633069	0.281746	-2.24695	0.0246434	0.569979	MINAR1
ENSG00000127952.17	880.867	0.495404	0.219977	2.25207	0.0243176	0.569979	STYXL1
ENSG00000229754.1	50.5339	-1.18968	0.528879	-2.24944	0.0244846	0.569979	CXCR2P1
ENSG00000162695.12	1204.9	-0.291494	0.129649	-2.24832	0.0245555	0.569979	SLC30A7
ENSG00000177189.14	4151.41	-0.335313	0.149094	-2.24901	0.0245117	0.569979	RPS6KA3
ENSG00000162735.19	1157.9	0.324618	0.144358	2.2487	0.0245317	0.569979	PEX19
ENSG00000174125.8	314.405	-0.705502	0.313843	-2.24794	0.0245797	0.569979	TLR1
ENSG00000160813.7	167.646	0.485691	0.216153	2.24698	0.0246413	0.569979	PPP1R35
ENSG00000026297.16	1001.21	0.443261	0.196947	2.25067	0.0244067	0.569979	RNASET2
ENSG00000088367.23	1331.96	0.836054	0.371884	2.24816	0.0245662	0.569979	EPB41L1
ENSG00000244128.7	9.06534	1.6722	0.744897	2.24487	0.0247763	0.572034	LINC01322
ENSG00000133460.19	166.256	0.503372	0.224355	2.24365	0.0248552	0.573174	SLC2A11
ENSG00000105639.20	262.25	-0.619793	0.276422	-2.2422	0.0249486	0.574646	JAK3
ENSG00000240204.3	48.7961	0.864508	0.386087	2.23915	0.025146	0.575779	SMKR1
ENSG00000188176.12	36.2489	1.30601	0.583242	2.23922	0.0251414	0.575779	SMTNL2
ENSG00000158246.8	31.0974	1.02509	0.457739	2.23947	0.0251251	0.575779	TENT5B
ENSG00000102934.10	362.398	0.923257	0.412054	2.24062	0.0250504	0.575779	PLLP
ENSG00000196914.9	4391.45	-0.280507	0.125264	-2.23933	0.0251345	0.575779	ARHGEF12
ENSG00000258405.11	26.0489	-1.42244	0.635946	-2.23672	0.0253044	0.577363	ZNF578
ENSG00000215146.5	46.4967	-1.34955	0.603145	-2.23753	0.0252519	0.577363	BX322639.1
ENSG00000134323.12	58.3628	1.29108	0.577133	2.23706	0.0252822	0.577363	MYCN
ENSG00000227077.3	26.3929	0.656297	0.293689	2.23467	0.0254393	0.57908	AC107983.1
ENSG00000124102.5	1069.36	-1.23777	0.553788	-2.23509	0.0254113	0.57908	PI3
ENSG00000230561.4	19.868	0.755455	0.338471	2.23197	0.0256171	0.579249	CCDC192
ENSG00000021826.17	226.947	1.66598	0.746276	2.23239	0.0255894	0.579249	CPS1
ENSG00000115232.14	904.496	-0.48893	0.219174	-2.23079	0.0256953	0.579249	ITGA4
ENSG00000198707.17	1245.07	0.350337	0.157025	2.23109	0.0256752	0.579249	CEP290
ENSG00000213942.3	29.2419	0.780643	0.34967	2.23252	0.0255809	0.579249	AC005840.1
ENSG00000124243.17	248.255	0.80339	0.359922	2.23212	0.0256068	0.579249	BCAS4
ENSG00000133789.15	1210.21	-0.336435	0.150835	-2.23049	0.0257152	0.579249	SWAP70
ENSG00000188599.17	40.9661	0.680072	0.304665	2.2322	0.025602	0.579249	NPIPP1
ENSG00000198814.13	970.657	-0.512201	0.229616	-2.23068	0.0257022	0.579249	GK
ENSG00000137860.12	117.709	1.77302	0.795085	2.22997	0.0257494	0.579346	SLC28A2
ENSG00000236432.8	27.647	-0.565493	0.253828	-2.22786	0.0258897	0.581155	MFF-DT
ENSG00000223704.2	13.6111	-0.916921	0.411554	-2.22795	0.0258841	0.581155	LINC01422
ENSG00000173456.5	493.118	-0.339178	0.152358	-2.22619	0.0260016	0.582995	RNF26
ENSG00000163840.10	2299.32	-0.347643	0.156231	-2.22518	0.026069	0.58303	DTX3L
ENSG00000147687.19	884.777	0.451384	0.20285	2.22521	0.0260669	0.58303	TATDN1
ENSG00000245293.3	17.2701	-0.640489	0.287883	-2.22482	0.0260933	0.58303	CYP2U1-AS1
ENSG00000102218.6	890.262	-0.366503	0.164815	-2.22373	0.0261668	0.584001	RP2
ENSG00000100105.18	692.475	0.442018	0.198839	2.22299	0.0262165	0.584439	PATZ1
ENSG00000196329.11	46.5418	-0.660379	0.297301	-2.22125	0.0263341	0.586387	GIMAP5
ENSG00000105967.16	383.532	-0.762442	0.343536	-2.21939	0.02646	0.588515	TFEC
ENSG00000224609.8	35.6112	0.725479	0.327178	2.21738	0.026597	0.589829	HSD52
ENSG00000228224.3	18.7702	0.818667	0.369137	2.21779	0.0265695	0.589829	NACA4P
ENSG00000009790.15	205.751	-0.654248	0.29508	-2.21719	0.0266102	0.589829	TRAF3IP3
ENSG00000076928.18	1500.51	0.489023	0.220639	2.21639	0.0266645	0.590033	ARHGEF1
ENSG00000280587.1	26.9382	-0.95444	0.430672	-2.21617	0.0266802	0.590033	LINC01348
ENSG00000276085.1	150.469	-1.22318	0.552863	-2.21246	0.0269352	0.591681	CCL3L3
ENSG00000127720.8	137.982	0.364375	0.164714	2.21217	0.0269551	0.591681	METTL25
ENSG00000142347.19	477.46	-0.538447	0.243413	-2.21207	0.0269617	0.591681	MYO1F
ENSG00000171236.10	608.373	-0.807419	0.365021	-2.21198	0.026968	0.591681	LRG1
ENSG00000065413.20	481.379	-0.453063	0.204769	-2.21256	0.0269281	0.591681	ANKRD44
ENSG00000258875.6	14.0599	-0.690865	0.312235	-2.21264	0.0269225	0.591681	AL135818.1
ENSG00000155265.11	247.106	1.04136	0.470626	2.21271	0.0269176	0.591681	GOLGA7B
ENSG00000286488.1	21.9902	-0.757517	0.342667	-2.21065	0.0270599	0.591692	AC103858.3
ENSG00000231007.5	10.7812	-1.05757	0.478322	-2.211	0.0270355	0.591692	CDC20P1
ENSG00000181690.8	186.347	1.0135	0.458316	2.21135	0.0270118	0.591692	PLAG1
ENSG00000079931.15	545.199	-0.654787	0.296291	-2.20994	0.0271092	0.592103	MOXD1
ENSG00000167315.18	2567.87	0.53083	0.240382	2.20827	0.0272254	0.593972	ACAA2
ENSG00000116824.5	350.946	-0.71642	0.324651	-2.20674	0.0273322	0.595633	CD2
ENSG00000254285.3	420.697	0.841613	0.381742	2.20466	0.0274778	0.598135	KRT8P3
ENSG00000124157.7	3.13598	-3.75242	1.70339	-2.20292	0.0276007	0.59821	SEMG2
ENSG00000172478.18	234.324	1.14468	0.519524	2.20333	0.0275718	0.59821	MAB21L4
ENSG00000211976.2	171.517	-1.44288	0.655001	-2.20286	0.0276045	0.59821	IGHV3-73
ENSG00000115523.17	227.543	-1.10898	0.50324	-2.20368	0.0275468	0.59821	GNLY
ENSG00000203499.12	737.54	0.707713	0.321348	2.20232	0.0276424	0.598364	IQANK1
ENSG00000135426.16	57.1515	-0.805131	0.365763	-2.20124	0.0277191	0.59869	TESPA1
ENSG00000153093.20	30.3804	0.728442	0.330907	2.20135	0.0277114	0.59869	ACOXL
ENSG00000111199.12	42.2483	-0.613089	0.278698	-2.19983	0.0278189	0.598912	TRPV4
ENSG00000079819.19	5129.78	-0.462406	0.210123	-2.20065	0.0277611	0.598912	EPB41L2
ENSG00000166164.16	2069.03	0.194479	0.0884081	2.19979	0.0278219	0.598912	BRD7
ENSG00000246228.6	50.5984	0.819874	0.372997	2.19807	0.0279443	0.60088	CASC8
ENSG00000185220.12	272.242	0.365999	0.166581	2.19713	0.0280113	0.601655	PGBD2
ENSG00000196937.11	1510.78	0.475018	0.216392	2.19517	0.0281513	0.603993	FAM3C
ENSG00000112078.14	2411.81	-0.275306	0.125488	-2.19388	0.0282442	0.604437	KCTD20
ENSG00000137491.15	1402.27	-0.471034	0.214712	-2.19379	0.0282503	0.604437	SLCO2B1
ENSG00000205078.6	23.9187	1.00443	0.457894	2.19358	0.0282654	0.604437	SYCE1L
ENSG00000204856.12	147.241	0.567339	0.25872	2.19287	0.0283168	0.604871	FAM216A
ENSG00000180096.12	93.8141	-0.594143	0.271221	-2.19062	0.0284789	0.605063	SEPTIN1
ENSG00000078124.12	1166.52	-0.454323	0.207479	-2.18973	0.0285439	0.605063	ACER3
ENSG00000167635.12	4363.19	0.427947	0.195279	2.19146	0.0284183	0.605063	ZNF146
ENSG00000139675.12	123.163	0.34343	0.156741	2.19107	0.0284469	0.605063	HNRNPA1L2
ENSG00000001631.16	205.355	0.310675	0.141867	2.18991	0.0285311	0.605063	KRIT1
ENSG00000147443.13	210.42	-0.657587	0.299959	-2.19226	0.0283611	0.605063	DOK2
ENSG00000179934.7	46.6584	-0.761097	0.347518	-2.19009	0.0285176	0.605063	CCR8
ENSG00000211946.3	55.445	-1.47079	0.6733	-2.18445	0.028929	0.6057	IGHV3-20
ENSG00000167613.16	590.757	-0.640171	0.292878	-2.1858	0.0288306	0.6057	LAIR1
ENSG00000105677.12	1690.44	0.461702	0.211408	2.18394	0.0289666	0.6057	TMEM147
ENSG00000005001.10	526.057	0.976813	0.446941	2.18555	0.0288485	0.6057	PRSS22
ENSG00000242071.3	563.969	0.466754	0.213637	2.1848	0.0289034	0.6057	RPL7AP6
ENSG00000120093.11	823.719	-0.749792	0.34306	-2.1856	0.0288448	0.6057	HOXB3
ENSG00000253873.6	19.9352	-1.01546	0.464531	-2.18599	0.0288165	0.6057	PCDHGA11
ENSG00000254838.5	317.439	-0.696658	0.318446	-2.18768	0.0286931	0.6057	GVINP1
ENSG00000254827.6	78.2447	-0.663132	0.303056	-2.18815	0.0286584	0.6057	SLC22A18AS
ENSG00000048740.18	1377.75	-0.406183	0.18574	-2.18683	0.028755	0.6057	CELF2
ENSG00000243479.3	83.8195	0.651238	0.297818	2.1867	0.0287647	0.6057	MNX1-AS1
ENSG00000136868.11	1568.34	-0.416893	0.190803	-2.18494	0.0288932	0.6057	SLC31A1
ENSG00000250508.1	21.1831	-0.874523	0.400466	-2.18376	0.0289795	0.6057	LINC02701
ENSG00000123643.13	516.083	-0.453604	0.20804	-2.18038	0.0292297	0.606123	SLC36A1
ENSG00000068078.20	635.466	0.886143	0.406082	2.18218	0.0290965	0.606123	FGFR3
ENSG00000170627.11	12.714	-0.964759	0.442574	-2.17988	0.0292661	0.606123	GTSF1
ENSG00000064490.14	513.867	0.297478	0.136414	2.18069	0.0292062	0.606123	RFXANK
ENSG00000261115.6	184.862	-1.35472	0.621162	-2.18095	0.0291874	0.606123	TMEM178B
ENSG00000244363.3	51.704	0.807308	0.370123	2.18119	0.0291694	0.606123	RPL7P23
ENSG00000007171.18	357.291	-1.13481	0.519936	-2.18259	0.029066	0.606123	NOS2
ENSG00000147041.12	316.543	1.10734	0.507453	2.18214	0.0290989	0.606123	SYTL5
ENSG00000165899.11	24.7256	0.895098	0.410654	2.17969	0.0292807	0.606123	OTOGL
ENSG00000197124.12	77.4611	-0.943405	0.432976	-2.17888	0.0293403	0.606709	ZNF682
ENSG00000154102.11	21.9962	1.08948	0.500271	2.17778	0.0294225	0.607762	C16orf74
ENSG00000108587.16	1234.38	-0.293349	0.134821	-2.17584	0.029567	0.610097	GOSR1
ENSG00000185753.13	982.066	-0.381537	0.175421	-2.17498	0.0296314	0.61013	CXorf38
ENSG00000280734.3	322.554	-0.76243	0.350533	-2.17506	0.0296255	0.61013	LINC01232
ENSG00000286219.1	17.335	-0.754601	0.347149	-2.17371	0.0297268	0.610284	NOTCH2NLC
ENSG00000167700.9	484.791	0.528958	0.243432	2.17292	0.0297864	0.610284	MFSD3
ENSG00000118369.13	168.569	-0.403986	0.185838	-2.17386	0.0297153	0.610284	USP35
ENSG00000278611.2	10.9848	0.839852	0.386531	2.17279	0.029796	0.610284	ZNF426-DT
ENSG00000128309.16	2122.19	0.381552	0.175539	2.1736	0.0297349	0.610284	MPST
ENSG00000165376.11	2677.92	-1.39976	0.644483	-2.17191	0.0298624	0.610497	CLDN2
ENSG00000171067.11	874.406	-0.332658	0.15317	-2.17182	0.0298693	0.610497	C11orf24
ENSG00000233622.3	31.8087	0.663679	0.305697	2.17104	0.0299284	0.611062	CYP2T1P
ENSG00000240395.1	46.6571	0.681784	0.314194	2.16994	0.030011	0.611472	RPL5P23
ENSG00000279088.1	162.754	0.40581	0.18705	2.16952	0.030043	0.611472	AC022400.6
ENSG00000013583.10	639.153	0.377982	0.174216	2.16962	0.030036	0.611472	HEBP1
ENSG00000147996.16	315.675	0.334519	0.154222	2.16908	0.0300769	0.611521	CBWD5
ENSG00000225830.15	559.108	0.241071	0.111217	2.16757	0.0301913	0.613206	ERCC6
ENSG00000132600.17	681.413	0.257715	0.118965	2.16631	0.0302877	0.613708	PRMT7
ENSG00000196693.15	1435.48	0.284372	0.131242	2.16678	0.0302513	0.613708	ZNF33B
ENSG00000099985.4	308.195	-1.08337	0.50031	-2.16539	0.0303575	0.613708	OSM
ENSG00000260219.2	49.874	0.44921	0.207467	2.16522	0.0303711	0.613708	CD2BP2-DT
ENSG00000165995.22	151.238	0.669033	0.308997	2.16518	0.0303741	0.613708	CACNB2
ENSG00000214049.8	429.71	1.67019	0.77175	2.16416	0.0304524	0.614634	UCA1
ENSG00000168014.17	582.852	-0.413943	0.191454	-2.16211	0.0306099	0.614634	C2CD3
ENSG00000138759.19	211.955	0.970326	0.448685	2.1626	0.0305721	0.614634	FRAS1
ENSG00000211661.2	2.38007	2.57853	1.192	2.16319	0.0305266	0.614634	IGLV3-22
ENSG00000226525.5	138.264	0.653667	0.302324	2.16214	0.0306075	0.614634	RPS7P10
ENSG00000177191.2	191.06	0.665249	0.30761	2.16264	0.0305687	0.614634	B3GNT8
ENSG00000134460.18	239.013	-0.719416	0.332969	-2.16061	0.0307254	0.616317	IL2RA
ENSG00000166801.16	2007.45	-0.374558	0.173404	-2.16004	0.0307697	0.61657	FAM111A
ENSG00000254395.1	22.4545	-1.4058	0.651065	-2.15923	0.0308321	0.617183	IGHV4-55
ENSG00000180777.14	8.15097	-1.48286	0.68705	-2.15829	0.0309051	0.617354	ANKRD30B
ENSG00000167850.4	38.7935	-0.591384	0.274056	-2.15789	0.0309361	0.617354	CD300C
ENSG00000107742.13	389.516	-0.623967	0.289052	-2.15866	0.0308763	0.617354	SPOCK2
ENSG00000184992.13	1652.3	-0.425852	0.197405	-2.15726	0.0309858	0.617711	BRI3BP
ENSG00000091137.14	11.6765	-0.676036	0.313637	-2.15547	0.0311248	0.617907	SLC26A4
ENSG00000211667.3	8.79325	-1.83529	0.851609	-2.15509	0.0311547	0.617907	IGLV3-12
ENSG00000137393.10	278.07	-0.584063	0.270906	-2.15596	0.0310865	0.617907	RNF144B
ENSG00000076864.19	881.087	-0.98277	0.455912	-2.15561	0.0311139	0.617907	RAP1GAP
ENSG00000161714.12	1318.58	0.512444	0.23766	2.1562	0.0310677	0.617907	PLCD3
ENSG00000241106.8	43.7839	-0.678606	0.315044	-2.15401	0.0312398	0.618331	HLA-DOB
ENSG00000122877.16	136.577	-0.926476	0.430116	-2.15401	0.0312392	0.618331	EGR2
ENSG00000231120.3	24.4714	0.663189	0.308661	2.1486	0.0316662	0.61851	BTF3P10
ENSG00000163515.6	99.4388	-1.23538	0.574092	-2.15188	0.031407	0.61851	RETNLB
ENSG00000248636.7	10.1473	-1.07888	0.501836	-2.14986	0.0315666	0.61851	AC002070.1
ENSG00000228203.7	23.4343	-0.691959	0.321912	-2.14953	0.0315927	0.61851	GRASLND
ENSG00000151632.17	129.09	0.909439	0.423248	2.14871	0.031657	0.61851	AKR1C2
ENSG00000261824.7	311.092	0.434671	0.202007	2.15176	0.0314161	0.61851	LINC00662
ENSG00000006695.12	456.37	-0.314749	0.146298	-2.15143	0.0314424	0.61851	COX10
ENSG00000088538.13	38.3261	-1.06596	0.495993	-2.14914	0.0316231	0.61851	DOCK3
ENSG00000137124.8	2180.8	-0.442628	0.205928	-2.14943	0.0316001	0.61851	ALDH1B1
ENSG00000042317.17	251.988	0.371877	0.173108	2.14824	0.0316946	0.61851	SPATA7
ENSG00000120149.9	357.475	1.07371	0.499808	2.14824	0.0316948	0.61851	MSX2
ENSG00000171860.5	713.144	-0.729978	0.33923	-2.15187	0.0314075	0.61851	C3AR1
ENSG00000234369.1	11.0279	0.740221	0.343969	2.152	0.0313975	0.61851	TATDN1P1
ENSG00000186106.11	711.772	0.461717	0.214853	2.14899	0.0316352	0.61851	ANKRD46
ENSG00000138315.13	34.5083	-1.19675	0.557381	-2.14709	0.031786	0.619667	OIT3
ENSG00000250995.1	12.8626	-0.723838	0.337199	-2.14662	0.0318236	0.619778	TMEM30BP1
ENSG00000134986.14	100.932	-0.432357	0.201456	-2.14616	0.03186	0.619866	NREP
ENSG00000154914.17	208.702	-0.377535	0.176009	-2.14497	0.031955	0.621091	USP43
ENSG00000111596.14	2511.42	0.304752	0.142166	2.14364	0.0320616	0.622473	CNOT2
ENSG00000204228.4	296.228	0.431736	0.201437	2.14329	0.0320902	0.622473	HSD17B8
ENSG00000257302.1	11.62	-1.53633	0.717423	-2.14146	0.0322371	0.623103	FAHD2P1
ENSG00000078081.8	188.506	-0.660272	0.308353	-2.14129	0.032251	0.623103	LAMP3
ENSG00000285872.1	15.2722	0.959054	0.44776	2.14189	0.0322021	0.623103	AC007240.3
ENSG00000105352.10	18.6906	-0.814722	0.380479	-2.1413	0.0322495	0.623103	CEACAM4
ENSG00000138823.13	41.9838	1.43144	0.670106	2.13614	0.0326679	0.623747	MTTP
ENSG00000138435.16	23.9931	-0.701459	0.327809	-2.13984	0.0323678	0.623747	CHRNA1
ENSG00000164924.18	32500.4	0.369468	0.172966	2.13607	0.0326738	0.623747	YWHAZ
ENSG00000261236.8	1560.74	0.44762	0.209292	2.13873	0.0324572	0.623747	BOP 1.00
ENSG00000162174.12	339.033	-1.08364	0.50716	-2.13669	0.0326233	0.623747	ASRGL1
ENSG00000105971.15	646.675	0.613041	0.286974	2.13623	0.032661	0.623747	CAV2
ENSG00000161298.18	55.8713	-0.600471	0.281156	-2.13572	0.032702	0.623747	ZNF382
ENSG00000228110.4	11.1224	0.548015	0.256416	2.13721	0.0325807	0.623747	ST13P19
ENSG00000152495.11	144.092	-0.573659	0.268549	-2.13614	0.0326679	0.623747	CAMK4
ENSG00000274895.1	14.7346	1.10996	0.518638	2.14015	0.0323426	0.623747	AC011700.1
ENSG00000205045.11	24.8479	-0.881715	0.4125	-2.13749	0.0325579	0.623747	SLFN12L
ENSG00000160959.8	409.022	0.376425	0.176087	2.13772	0.0325394	0.623747	LRRC14
ENSG00000255062.1	22.2279	-0.470685	0.22005	-2.13899	0.0324362	0.623747	AP001318.2
ENSG00000188385.12	12.0128	-0.919355	0.430741	-2.13436	0.0328136	0.625261	JAKMIP3
ENSG00000213087.3	23.7508	0.739897	0.346827	2.13333	0.0328977	0.62625	AL356535.1
ENSG00000239305.7	824.694	0.292636	0.13726	2.13198	0.0330085	0.627743	RNF103
ENSG00000184408.10	25.475	-1.15297	0.540901	-2.13157	0.0330424	0.627772	KCND2
ENSG00000165138.18	939.65	0.347056	0.162998	2.12921	0.0332371	0.628362	ANKS6
ENSG00000120693.14	308.73	-0.80607	0.3783	-2.13077	0.0331081	0.628362	SMAD9
ENSG00000172123.13	131.558	-0.556852	0.261477	-2.12964	0.0332013	0.628362	SLFN12
ENSG00000183091.19	202.366	-1.1092	0.520844	-2.12962	0.0332031	0.628362	NEB
ENSG00000071794.16	727.573	-0.825693	0.387723	-2.1296	0.0332048	0.628362	HLTF
ENSG00000173110.8	148.719	-0.721685	0.339004	-2.12884	0.0332676	0.628362	HSPA6
ENSG00000254373.1	14.9189	0.66799	0.314696	2.12266	0.0337827	0.628383	AC112191.2
ENSG00000204956.5	51.0885	-0.845306	0.397741	-2.12527	0.033564	0.628383	PCDHGA1
ENSG00000120075.5	324.36	-0.775164	0.364452	-2.12693	0.0334256	0.628383	HOXB5
ENSG00000057935.14	911.654	0.25083	0.117929	2.12695	0.0334242	0.628383	MTA3
ENSG00000224094.1	119.254	0.692108	0.325484	2.1264	0.0334702	0.628383	RPS24P8
ENSG00000253738.2	1228.42	0.42134	0.198501	2.12261	0.0337865	0.628383	OTUD6B-AS1
ENSG00000146904.9	666.528	0.621346	0.292573	2.12373	0.0336928	0.628383	EPHA1
ENSG00000196542.8	64.8232	1.45275	0.68351	2.12543	0.0335508	0.628383	SPTSSB
ENSG00000111144.10	2947.44	0.369903	0.174099	2.12467	0.0336139	0.628383	LTA4H
ENSG00000148200.17	247.226	0.776831	0.365834	2.12345	0.0337161	0.628383	NR6A1
ENSG00000174136.13	447.44	-0.959043	0.451676	-2.1233	0.0337289	0.628383	RGMB
ENSG00000164684.13	1178.75	0.648105	0.30482	2.12619	0.0334874	0.628383	ZNF704
ENSG00000224397.7	146.129	-0.672162	0.31608	-2.12656	0.033457	0.628383	PELATON
ENSG00000168803.16	173.182	-0.458455	0.215906	-2.1234	0.0337208	0.628383	ADAL
ENSG00000185246.18	1091.38	0.25509	0.120086	2.12423	0.0336508	0.628383	PRPF39
ENSG00000226864.2	17.9411	0.947826	0.44541	2.12799	0.0333383	0.628383	ATE1-AS1
ENSG00000072422.17	657.607	-0.427305	0.201469	-2.12095	0.0339262	0.629564	RHOBTB1
ENSG00000112096.19	11500	-0.513819	0.242241	-2.1211	0.033913	0.629564	SOD2
ENSG00000253497.1	13.2065	-1.54413	0.728236	-2.12037	0.0339748	0.629564	IGKV1-13
ENSG00000244245.1	35.3353	0.621161	0.292958	2.12031	0.0339797	0.629564	AC133134.1
ENSG00000140262.18	3626.11	0.627611	0.296183	2.11899	0.0340909	0.630422	TCF12
ENSG00000282651.2	231.549	-2.14775	1.01354	-2.11907	0.0340848	0.630422	IGHV5-10-1
ENSG00000113532.13	356.875	-0.528038	0.249341	-2.11773	0.0341975	0.630515	ST8SIA4
ENSG00000122122.10	379.229	-0.586883	0.277172	-2.1174	0.0342258	0.630515	SASH3
ENSG00000165810.17	264.11	0.797819	0.376783	2.11745	0.0342219	0.630515	BTNL9
ENSG00000217027.1	94.3138	0.766915	0.362039	2.11832	0.0341477	0.630515	TPT1P4
ENSG00000119231.11	920.986	-0.241398	0.114035	-2.11687	0.0342709	0.630747	SENP5
ENSG00000163600.13	101.451	-0.746578	0.352751	-2.11644	0.0343071	0.630816	ICOS
ENSG00000120526.12	1494.58	0.479468	0.226686	2.11512	0.0344194	0.632158	NUDCD1
ENSG00000083223.18	1734.19	0.253462	0.119851	2.11482	0.0344452	0.632158	TUT7
ENSG00000105701.16	3284.24	0.311047	0.147192	2.11321	0.0345832	0.634091	FKBP8
ENSG00000243517.1	51.1805	0.722843	0.342125	2.1128	0.0346178	0.634126	AC024940.2
ENSG00000161929.15	94.5643	-0.71017	0.33638	-2.11121	0.0347541	0.636024	SCIMP
ENSG00000269981.1	27.4559	-1.52651	0.723493	-2.10992	0.0348649	0.63685	AL627309.7
ENSG00000232573.1	645.612	0.629254	0.298222	2.11001	0.0348571	0.63685	RPL3P4
ENSG00000167987.11	482.072	-0.346231	0.164207	-2.1085	0.034988	0.638498	VPS37C
ENSG00000255587.9	16.2077	-0.830385	0.394092	-2.10708	0.0351102	0.640127	RAB44
ENSG00000015285.11	137.424	-0.627761	0.297999	-2.10659	0.0351534	0.640313	WAS
ENSG00000070886.12	2.72608	2.91653	1.38556	2.10494	0.0352962	0.642311	EPHA8
ENSG00000112183.15	41.1984	1.05939	0.503495	2.10407	0.0353723	0.643094	RBM24
ENSG00000070985.13	19.2246	-1.06905	0.50821	-2.10355	0.0354174	0.64331	TRPM5
ENSG00000272077.1	27.789	-0.616588	0.293287	-2.10234	0.0355235	0.644635	AC124045.1
ENSG00000250266.2	45.8296	-1.43765	0.684192	-2.10124	0.0356201	0.645182	LINC01612
ENSG00000237039.1	27.8078	0.585834	0.278788	2.10136	0.0356096	0.645182	RPS28P4
ENSG00000179761.12	146.923	-1.31673	0.627663	-2.09783	0.0359203	0.645393	PIPOX
ENSG00000162144.10	552.489	-0.220605	0.105124	-2.09853	0.0358582	0.645393	CYB561A3
ENSG00000248734.2	30.4581	-0.641304	0.305717	-2.09771	0.0359309	0.645393	AC008906.1
ENSG00000086717.18	22.088	-0.735433	0.350177	-2.10018	0.0357134	0.645393	PPEF1
ENSG00000167770.11	1303.12	-0.21591	0.102805	-2.1002	0.0357117	0.645393	OTUB1
ENSG00000226532.1	12.0863	0.991784	0.472736	2.09797	0.0359082	0.645393	AL022718.1
ENSG00000171612.7	425.527	-0.415039	0.197716	-2.09916	0.0358026	0.645393	SLC25A33
ENSG00000169432.18	99.109	0.78836	0.375605	2.09891	0.0358248	0.645393	SCN9A
ENSG00000197746.14	18617.5	-0.369037	0.175809	-2.09908	0.0358101	0.645393	PSAP
ENSG00000073464.13	209.252	-0.687301	0.327863	-2.09631	0.036055	0.64583	CLCN4
ENSG00000133665.13	6.47195	-2.44723	1.16715	-2.09676	0.0360144	0.64583	DYDC2
ENSG00000174899.12	14.1041	-1.34655	0.642295	-2.09647	0.0360409	0.64583	SLC66A1L
ENSG00000104341.17	3756.48	0.7718	0.368379	2.09513	0.0361598	0.647111	LAPTM4B
ENSG00000249096.7	110.722	-0.713573	0.341228	-2.09119	0.0365108	0.647823	LINC02362
ENSG00000228168.1	43.1347	-0.725515	0.346592	-2.09328	0.0363241	0.647823	HNRNPA1P21
ENSG00000228278.5	8.39152	-1.41825	0.678378	-2.09065	0.0365593	0.647823	ORM2
ENSG00000103569.10	477.818	-0.986821	0.471628	-2.09237	0.0364051	0.647823	AQP9
ENSG00000243181.2	24.8172	0.897623	0.429072	2.09201	0.0364377	0.647823	AC087343.1
ENSG00000174600.14	375.387	-0.59196	0.282959	-2.09203	0.0364355	0.647823	CMKLR1
ENSG00000169629.12	46.6483	-0.689252	0.329362	-2.09268	0.0363773	0.647823	RGPD8
ENSG00000104219.13	896.327	0.801211	0.38325	2.09057	0.0365666	0.647823	ZDHHC2
ENSG00000255642.1	55.6872	0.511262	0.24448	2.09122	0.0365086	0.647823	PABPC1P4
ENSG00000104237.11	23.5889	1.15496	0.551889	2.09274	0.0363723	0.647823	RP1
ENSG00000172782.12	46.1392	2.66214	1.27157	2.09358	0.036297	0.647823	FADS6
ENSG00000182162.11	123.904	-0.621066	0.297264	-2.08927	0.0366833	0.649297	P2RY8
ENSG00000163295.5	20.8701	-1.36011	0.651164	-2.08873	0.0367317	0.649562	ALPI
ENSG00000154451.14	1060.66	-0.934827	0.447941	-2.08694	0.0368935	0.650135	GBP5
ENSG00000280173.1	37.5067	-0.516704	0.247575	-2.08706	0.0368827	0.650135	AC104447.1
ENSG00000081041.9	490.767	-0.762369	0.365313	-2.08689	0.036898	0.650135	CXCL2
ENSG00000187987.9	11.7685	-0.952821	0.456499	-2.08723	0.0368671	0.650135	ZSCAN23
ENSG00000182327.8	17.3286	0.64928	0.311187	2.08647	0.0369365	0.650222	GLTPD2
ENSG00000277007.1	16.7214	0.856818	0.411039	2.08452	0.0371129	0.651644	AC096642.1
ENSG00000070404.10	458.945	0.555548	0.266518	2.08446	0.0371179	0.651644	FSTL3
ENSG00000105825.14	143.857	1.04148	0.499574	2.08473	0.0370937	0.651644	TFPI2
ENSG00000160972.9	481.059	0.531081	0.254907	2.08343	0.0372121	0.652708	PPP1R16A
ENSG00000116793.16	401.353	-0.260522	0.125524	-2.07548	0.0379425	0.652956	PHTF1
ENSG00000143387.14	4641.21	-0.553396	0.266336	-2.07781	0.0377265	0.652956	CTSK
ENSG00000270959.1	28.0746	-0.524272	0.253039	-2.0719	0.0382747	0.652956	LPP-AS2
ENSG00000139874.6	122.488	1.01142	0.488241	2.07157	0.0383059	0.652956	SSTR1
ENSG00000258867.6	33.3839	-1.2406	0.598866	-2.07158	0.0383047	0.652956	LINC01146
ENSG00000049449.10	1898.28	-0.516625	0.248488	-2.07908	0.0376101	0.652956	RCN1
ENSG00000155530.3	13.888	-1.04525	0.504263	-2.07283	0.0381884	0.652956	LRGUK
ENSG00000111344.11	218.439	0.837362	0.403769	2.07387	0.0380917	0.652956	RASAL1
ENSG00000177508.12	21.4609	1.40285	0.677883	2.06946	0.0385028	0.652956	IRX3
ENSG00000177954.14	31599.4	0.455069	0.219327	2.07484	0.0380012	0.652956	RPS27
ENSG00000008226.20	43.3704	0.922805	0.444251	2.07722	0.0377817	0.652956	DLEC1
ENSG00000179862.7	78.1875	0.794405	0.382469	2.07705	0.0377973	0.652956	CITED4
ENSG00000166311.10	332.976	-0.439522	0.211231	-2.08076	0.0374558	0.652956	SMPD1
ENSG00000105993.15	2780.28	0.276561	0.132991	2.07954	0.0375673	0.652956	DNAJB6
ENSG00000116574.6	1107.09	0.586995	0.282863	2.07519	0.0379688	0.652956	RHOU
ENSG00000230207.1	89.3048	0.647953	0.313038	2.06988	0.0384632	0.652956	RPL4P5
ENSG00000169469.9	23.2949	2.23527	1.0763	2.07682	0.0378184	0.652956	SPRR1B
ENSG00000181104.7	1061.84	-0.412161	0.198152	-2.08003	0.0375226	0.652956	F2R
ENSG00000213937.4	22.3144	1.29279	0.624483	2.07018	0.0384354	0.652956	CLDN9
ENSG00000141480.18	1023.06	-0.304542	0.147008	-2.0716	0.0383028	0.652956	ARRB2
ENSG00000160214.13	728.363	0.48397	0.233864	2.06945	0.0385041	0.652956	RRP1
ENSG00000185291.12	258.118	-0.53088	0.255311	-2.07935	0.0375853	0.652956	IL3RA
ENSG00000047932.14	1414.04	0.217823	0.104967	2.07515	0.0379722	0.652956	GOPC
ENSG00000084636.18	1202.9	0.754835	0.364717	2.06964	0.0384859	0.652956	COL16A1
ENSG00000172889.16	259.025	0.579868	0.27944	2.07511	0.0379763	0.652956	EGFL7
ENSG00000196126.11	6524.06	-0.724449	0.349676	-2.07177	0.0382867	0.652956	HLA-DRB1
ENSG00000120068.7	474.439	-0.938793	0.450798	-2.08252	0.0372954	0.652956	HOXB8
ENSG00000150556.17	119.02	0.971285	0.468743	2.07211	0.0382555	0.652956	LYPD6B
ENSG00000147606.9	15.5822	-0.942439	0.452685	-2.08189	0.0373526	0.652956	SLC26A7
ENSG00000147592.9	656.082	0.593684	0.286746	2.07042	0.0384131	0.652956	LACTB2
ENSG00000144152.13	23.0264	-0.621519	0.298731	-2.08054	0.0374765	0.652956	FBLN7
ENSG00000163739.5	1232.04	-0.742989	0.357276	-2.07959	0.0375629	0.652956	CXCL1
ENSG00000126759.14	9.90565	-0.68851	0.331657	-2.07597	0.0378966	0.652956	CFP
ENSG00000116191.17	1324.73	0.311491	0.149622	2.08185	0.0373558	0.652956	RALGPS2
ENSG00000142065.14	328.626	0.337209	0.162089	2.08039	0.0374894	0.652956	ZFP14
ENSG00000139364.10	18.5338	0.872203	0.421112	2.07119	0.0383413	0.652956	TMEM132B
ENSG00000169398.19	3400.42	0.308978	0.148733	2.0774	0.0377646	0.652956	PTK2
ENSG00000152315.5	29.0062	-0.649636	0.312711	-2.07744	0.0377614	0.652956	KCNK13
ENSG00000253846.2	76.0827	-1.23805	0.598742	-2.06775	0.0386639	0.653289	PCDHGA10
ENSG00000206228.4	25.2971	0.55708	0.269564	2.0666	0.0387719	0.653289	HNRNPA1P4
ENSG00000114405.11	148.49	-0.809114	0.39144	-2.06702	0.0387326	0.653289	C3orf14
ENSG00000125124.13	961.82	0.33891	0.163821	2.06878	0.0385667	0.653289	BBS2
ENSG00000222011.9	187.493	0.3142	0.15208	2.06602	0.0388266	0.653289	FAM185A
ENSG00000185811.19	312.096	-0.637214	0.308143	-2.06792	0.0386477	0.653289	IKZF1
ENSG00000234335.1	48.1105	0.612556	0.296477	2.06611	0.0388177	0.653289	RPS4XP11
ENSG00000117090.15	112.635	-0.6091	0.294468	-2.06847	0.0385955	0.653289	SLAMF1
ENSG00000236830.7	70.8551	0.503344	0.243597	2.0663	0.0388005	0.653289	CBR3-AS1
ENSG00000161277.11	102.073	0.350675	0.170428	2.05761	0.0396275	0.653597	THAP8
ENSG00000171310.11	454.84	-0.580823	0.281239	-2.06523	0.0389014	0.653597	CHST11
ENSG00000162344.4	43.7939	2.02829	0.984674	2.05986	0.0394118	0.653597	FGF19
ENSG00000260641.1	30.0944	0.90458	0.440188	2.05499	0.0398802	0.653597	AC114811.2
ENSG00000137818.12	29611.7	0.424732	0.206677	2.05505	0.0398741	0.653597	RPLP1
ENSG00000196072.12	1023.86	0.580225	0.28189	2.05834	0.0395577	0.653597	BLOC1S2
ENSG00000134324.12	886.572	-0.552675	0.269082	-2.05393	0.0399829	0.653597	LPIN1
ENSG00000101347.10	2172.12	-0.432266	0.210026	-2.05815	0.0395755	0.653597	SAMHD1
ENSG00000270426.1	9.99035	-0.64093	0.310656	-2.06315	0.0390984	0.653597	AC099343.2
ENSG00000167904.15	866.207	0.394391	0.191768	2.05661	0.0397241	0.653597	TMEM68
ENSG00000213563.7	394.241	0.356752	0.173595	2.05508	0.0398713	0.653597	C8orf82
ENSG00000188883.5	16.0547	1.90101	0.92558	2.05386	0.0399893	0.653597	KLRG2
ENSG00000259488.2	11.9351	-0.795178	0.386393	-2.05795	0.0395947	0.653597	AC023355.1
ENSG00000109667.12	124.948	-0.481561	0.233575	-2.0617	0.0392366	0.653597	SLC2A9
ENSG00000160654.11	76.6233	-0.72161	0.351257	-2.05436	0.0399405	0.653597	CD3G
ENSG00000067064.11	2399.43	-0.614234	0.297466	-2.06489	0.0389332	0.653597	IDI1
ENSG00000204335.4	215.082	1.07193	0.519379	2.06388	0.0390292	0.653597	SP5
ENSG00000204174.8	18.8641	1.23002	0.597877	2.05731	0.0396561	0.653597	NPY4R
ENSG00000063660.9	475.158	0.55372	0.268816	2.05985	0.0394129	0.653597	GPC1
ENSG00000279331.1	32.0105	0.467606	0.227254	2.05763	0.0396254	0.653597	RBM12B-AS1
ENSG00000128513.16	967.179	0.425359	0.206067	2.06418	0.039001	0.653597	POT1
ENSG00000196787.3	59.5183	0.67846	0.328821	2.06331	0.0390832	0.653597	H2AC11
ENSG00000128284.19	653.059	-0.597161	0.290704	-2.05419	0.0399576	0.653597	APOL3
ENSG00000177105.10	679.8	-0.214714	0.104217	-2.06025	0.039375	0.653597	RHOG
ENSG00000233927.5	10303.2	0.386214	0.187114	2.06406	0.039012	0.653597	RPS28
ENSG00000243660.11	131.232	0.420572	0.204236	2.05925	0.0394705	0.653597	ZNF487
ENSG00000198785.7	30.7757	-0.621542	0.302452	-2.05501	0.039878	0.653597	GRIN3A
ENSG00000116017.11	667.891	0.921493	0.447895	2.05738	0.0396492	0.653597	ARID3A
ENSG00000198743.7	1447.36	0.476349	0.230944	2.06261	0.0391494	0.653597	SLC5A3
ENSG00000242100.2	27.4644	0.845458	0.411182	2.05616	0.0397668	0.653597	RPL9P32
ENSG00000243431.1	12.669	0.624153	0.303089	2.05931	0.0394649	0.653597	RPL5P30
ENSG00000155229.21	1439.83	0.22806	0.110805	2.0582	0.0395706	0.653597	MMS19
ENSG00000237512.6	11.5355	1.56769	0.761427	2.05888	0.0395058	0.653597	UNC5B-AS1
ENSG00000004848.8	12.3727	-1.83017	0.887328	-2.06257	0.0391538	0.653597	ARX
ENSG00000155324.10	569.391	0.340648	0.165907	2.05324	0.0400489	0.65402	GRAMD2B
ENSG00000228801.6	221.918	0.522294	0.254674	2.05083	0.0402833	0.654588	AC064807.1
ENSG00000144668.12	553.294	0.812505	0.396297	2.05024	0.0403408	0.654588	ITGA9
ENSG00000167984.18	136.338	-0.583216	0.28448	-2.05011	0.0403534	0.654588	NLRC3
ENSG00000178660.6	13.4647	0.747236	0.364427	2.05044	0.0403216	0.654588	ARMC10P1
ENSG00000235776.2	26.5371	0.566979	0.276469	2.05079	0.0402875	0.654588	AC000089.1
ENSG00000125508.3	116.585	0.839159	0.409005	2.05171	0.0401982	0.654588	SRMS
ENSG00000244734.4	659.088	-1.15991	0.565226	-2.05211	0.040159	0.654588	HBB
ENSG00000148303.17	39727.6	0.280987	0.13698	2.0513	0.0402379	0.654588	RPL7A
ENSG00000235505.7	95.9494	-0.72836	0.355382	-2.04951	0.0404121	0.654646	CASP4LP
ENSG00000168234.13	299.863	0.363403	0.177323	2.04939	0.0404244	0.654646	TTC39C
ENSG00000234996.4	28.5388	0.829308	0.404781	2.04878	0.0404836	0.655059	ACTG1P25
ENSG00000197446.9	10.2712	1.34725	0.658384	2.0463	0.0407273	0.655519	CYP2F1
ENSG00000285715.1	16.0478	0.734705	0.359429	2.04409	0.0409447	0.655519	AC063960.1
ENSG00000142686.8	296.514	-0.247905	0.121216	-2.04515	0.04084	0.655519	C1orf216
ENSG00000184988.8	111.874	-0.492268	0.240765	-2.0446	0.0408946	0.655519	TMEM106A
ENSG00000172296.13	198.709	0.681614	0.333239	2.04542	0.0408131	0.655519	SPTLC3
ENSG00000132541.11	776.814	0.496762	0.242764	2.04628	0.0407289	0.655519	RIDA
ENSG00000147394.18	448.526	0.557852	0.272482	2.0473	0.0406285	0.655519	ZNF185
ENSG00000188536.13	84.4834	-1.2718	0.621659	-2.04582	0.0407736	0.655519	HBA2
ENSG00000008735.14	28.036	0.874471	0.427818	2.04403	0.040951	0.655519	MAPK8IP2
ENSG00000090060.18	8065.95	0.271033	0.132572	2.04442	0.0409117	0.655519	PAPOLA
ENSG00000172349.17	324.225	-0.574605	0.280909	-2.04552	0.0408034	0.655519	IL16
ENSG00000176490.5	19.4993	1.04968	0.513411	2.04452	0.0409022	0.655519	DIRAS1
ENSG00000128340.15	683.918	-0.490476	0.239951	-2.04407	0.0409466	0.655519	RAC2
ENSG00000218175.2	324.891	0.608832	0.297992	2.04312	0.041041	0.656419	AC016739.1
ENSG00000213609.3	58.7445	0.5401	0.264441	2.04242	0.0411098	0.656979	RPL7AP50
ENSG00000120798.17	949.966	0.305688	0.149797	2.04069	0.0412819	0.658747	NR2C1
ENSG00000130702.15	677.282	0.864971	0.423876	2.04062	0.0412883	0.658747	LAMA5
ENSG00000171303.7	30.7329	1.11011	0.544137	2.04013	0.0413374	0.658988	KCNK3
ENSG00000239819.2	19.958	-0.927808	0.455093	-2.03872	0.0414777	0.660683	IGKV1D-8
ENSG00000130956.14	261.215	0.347983	0.170797	2.03741	0.0416091	0.661149	HABP4
ENSG00000253305.2	18.9797	-0.839401	0.411961	-2.03757	0.0415928	0.661149	PCDHGB6
ENSG00000186891.14	53.222	-0.653047	0.320477	-2.03773	0.0415765	0.661149	TNFRSF18
ENSG00000183935.5	60.1392	0.42906	0.210754	2.03583	0.0417673	0.66312	HTR7P1
ENSG00000174586.11	18.5032	0.595403	0.292523	2.03541	0.0418101	0.663258	ZNF497
ENSG00000054356.14	24.7848	1.09795	0.539588	2.0348	0.041871	0.663285	PTPRN
ENSG00000023171.18	200.116	0.890545	0.437677	2.03471	0.0418802	0.663285	GRAMD1B
ENSG00000176563.10	60.9766	0.734274	0.361116	2.03335	0.0420177	0.664384	CNTD1
ENSG00000115525.18	207.91	-0.498166	0.244999	-2.03334	0.042018	0.664384	ST3GAL5
ENSG00000156709.15	1653.09	-0.267614	0.131654	-2.03271	0.0420821	0.664856	AIFM1
ENSG00000271216.2	17.4611	-1.19709	0.589021	-2.03235	0.0421185	0.66489	LINC01050
ENSG00000185565.12	446.444	-0.683739	0.336851	-2.0298	0.0423771	0.668034	LSAMP
ENSG00000180353.11	992.722	-0.522519	0.257436	-2.02971	0.0423865	0.668034	HCLS1
ENSG00000138821.13	3033.36	-0.742006	0.365736	-2.0288	0.0424783	0.668938	SLC39A8
ENSG00000023287.13	2890.46	0.361646	0.178335	2.0279	0.0425701	0.669298	RB1CC1
ENSG00000234782.3	211.869	0.696199	0.343308	2.02791	0.0425692	0.669298	TPT1P9
ENSG00000007038.11	10.9653	-1.33603	0.659087	-2.02709	0.0426533	0.670064	PRSS21
ENSG00000231133.8	10.5305	-1.55733	0.768941	-2.02529	0.042838	0.670515	HAR1B
ENSG00000170956.17	35.2823	-0.971139	0.479411	-2.02569	0.0427963	0.670515	CEACAM3
ENSG00000242574.9	988.363	-0.674387	0.333176	-2.02412	0.0429583	0.670515	HLA-DMB
ENSG00000126254.12	952.842	0.324387	0.160161	2.02538	0.0428282	0.670515	RBM42
ENSG00000121797.10	392.366	-0.447776	0.221219	-2.02413	0.0429567	0.670515	CCRL2
ENSG00000008853.17	210.904	0.536778	0.265139	2.02452	0.0429171	0.670515	RHOBTB2
ENSG00000075673.12	6.30971	-2.08497	1.02992	-2.0244	0.0429293	0.670515	ATP12A
ENSG00000175634.15	734.985	-0.33087	0.163404	-2.02486	0.042882	0.670515	RPS6KB2
ENSG00000006740.17	256.632	-0.840063	0.415131	-2.02361	0.0430102	0.670786	ARHGAP44
ENSG00000115325.13	349.358	-0.270737	0.133832	-2.02297	0.0430766	0.671159	DOK1
ENSG00000234498.3	45.8426	0.655633	0.324243	2.02204	0.0431723	0.671159	RPL13AP20
ENSG00000020426.11	346.727	0.457397	0.226195	2.02213	0.0431625	0.671159	MNAT1
ENSG00000155792.10	627.547	0.510107	0.252268	2.02208	0.0431678	0.671159	DEPTOR
ENSG00000147889.18	131.01	0.958886	0.47464	2.02024	0.0433585	0.671375	CDKN2A
ENSG00000142534.7	38153.3	0.406037	0.200859	2.0215	0.0432283	0.671375	RPS11
ENSG00000234322.1	11.1619	0.506658	0.250689	2.02106	0.0432738	0.671375	ST13P18
ENSG00000108107.15	13277.5	0.36707	0.18175	2.01964	0.0434203	0.671375	RPL28
ENSG00000259498.1	10.6431	0.914237	0.45269	2.01957	0.0434283	0.671375	TPM1-AS
ENSG00000198420.10	596.285	0.337555	0.167094	2.02015	0.0433679	0.671375	TCAF1
ENSG00000134830.6	60.7059	-0.72799	0.360433	-2.01977	0.0434077	0.671375	C5AR2
ENSG00000170801.10	683.795	-0.5845	0.289532	-2.01877	0.0435106	0.672113	HTRA3
ENSG00000198851.10	239.484	-0.659243	0.326641	-2.01825	0.043565	0.672418	CD3E
ENSG00000241163.8	11.3112	-0.752896	0.373112	-2.01788	0.0436038	0.672481	LINC00877
ENSG00000197705.10	19.2526	1.218	0.603767	2.01733	0.0436611	0.672623	KLHL14
ENSG00000198223.17	241.762	-0.594602	0.294777	-2.01713	0.0436822	0.672623	CSF2RA
ENSG00000224635.2	19.0766	-0.899391	0.446308	-2.01518	0.0438857	0.675221	AL391095.1
ENSG00000253227.2	19.5559	1.19619	0.593753	2.01463	0.0439439	0.675581	AC090192.2
ENSG00000105672.14	30.6911	0.475049	0.23589	2.01386	0.0440239	0.676276	ETV2
ENSG00000173404.5	10.5541	-1.40919	0.700133	-2.01275	0.0441409	0.677536	INSM1
ENSG00000272235.1	29.0614	0.993288	0.494893	2.00708	0.0447414	0.677916	AL590438.1
ENSG00000100650.16	4717.33	0.22904	0.114004	2.00905	0.0445319	0.677916	SRSF5
ENSG00000131650.14	17.7643	0.812114	0.404977	2.00533	0.0449274	0.677916	KREMEN2
ENSG00000164188.9	20.8993	1.10571	0.550851	2.00727	0.0447204	0.677916	RANBP3L
ENSG00000032219.19	1044.15	0.243989	0.121557	2.0072	0.0447285	0.677916	ARID4A
ENSG00000173546.7	185.284	0.743754	0.370785	2.00589	0.0448683	0.677916	CSPG4
ENSG00000196793.14	304.951	0.489412	0.243995	2.00583	0.0448742	0.677916	ZNF239
ENSG00000287692.1	7.22829	-1.29854	0.647112	-2.00667	0.0447846	0.677916	AC053545.1
ENSG00000070601.10	6.061	1.34117	0.666571	2.01205	0.0442146	0.677916	FRMPD1
ENSG00000169213.7	163.487	-0.920033	0.458163	-2.00809	0.0446339	0.677916	RAB3B
ENSG00000261644.2	14.4773	-0.649885	0.323102	-2.01139	0.0442839	0.677916	AC007728.2
ENSG00000133265.11	935.949	0.294793	0.146998	2.00543	0.0449175	0.677916	HSPBP1
ENSG00000101844.18	533.461	-0.44932	0.223695	-2.00863	0.0445764	0.677916	ATG4A
ENSG00000240891.8	253.664	-0.356352	0.177707	-2.00527	0.0449337	0.677916	PLCXD2
ENSG00000286223.1	24.671	0.493236	0.245948	2.00545	0.0449153	0.677916	AC064836.3
ENSG00000259295.6	10.8453	-0.780743	0.388652	-2.00885	0.0445532	0.677916	CSPG4P12
ENSG00000163380.16	14.5202	-0.666518	0.332019	-2.00747	0.0446998	0.677916	LMOD3
ENSG00000172531.16	2693.14	-0.240024	0.119547	-2.00777	0.0446676	0.677916	PPP1CA
ENSG00000211952.3	18.4435	-1.11447	0.554427	-2.01013	0.0444179	0.677916	IGHV4-28
ENSG00000185905.4	78.4893	-0.773388	0.385354	-2.00695	0.0447546	0.677916	C16orf54
ENSG00000124875.10	64.1141	-0.792679	0.394233	-2.01069	0.0443587	0.677916	CXCL6
ENSG00000185834.10	284.863	0.730846	0.364387	2.00569	0.0448897	0.677916	RPL12P4
ENSG00000181418.8	47.6308	-0.912566	0.455363	-2.00404	0.0450658	0.679382	DDN
ENSG00000259345.7	30.2064	0.924974	0.461801	2.00297	0.0451805	0.680054	AC013652.1
ENSG00000242207.1	225.878	-0.989485	0.493948	-2.00322	0.045154	0.680054	HOXB-AS4
ENSG00000241361.8	10.5286	2.1989	1.098	2.00264	0.0452159	0.68006	SLC25A24P1
ENSG00000146192.15	228.471	-0.513199	0.256324	-2.00215	0.0452689	0.68033	FGD2
ENSG00000179869.15	52.6529	-0.950675	0.475024	-2.00132	0.0453578	0.681138	ABCA13
ENSG00000165807.8	113.519	0.773231	0.386863	1.99872	0.0456386	0.684826	PPP1R36
ENSG00000184903.10	320.215	0.507024	0.253742	1.99819	0.0456963	0.685163	IMMP2L
ENSG00000242689.3	10.9305	-0.66664	0.333814	-1.99704	0.045821	0.686501	CNTF
ENSG00000110446.11	444.48	-0.576419	0.289255	-1.99277	0.0462863	0.686586	SLC15A3
ENSG00000245910.8	1160.97	0.44416	0.222796	1.99358	0.0461985	0.686586	SNHG6
ENSG00000205517.13	104.9	1.14438	0.573342	1.99599	0.0459352	0.686586	RGL3
ENSG00000119684.16	902.826	0.316267	0.158706	1.99278	0.0462853	0.686586	MLH3
ENSG00000237550.5	2460.26	0.768346	0.385449	1.99338	0.0462202	0.686586	AC243919.1
ENSG00000126262.5	106.814	-0.885827	0.444506	-1.99284	0.0462795	0.686586	FFAR2
ENSG00000153094.24	502.914	0.357228	0.179111	1.99446	0.0461022	0.686586	BCL2L11
ENSG00000105854.13	3776.83	0.53335	0.267554	1.99343	0.0462143	0.686586	PON2
ENSG00000176853.16	3001.17	0.314842	0.157767	1.99562	0.0459752	0.686586	FAM91A1
ENSG00000171777.16	55.1232	-0.589593	0.295624	-1.99441	0.0461077	0.686586	RASGRP4
ENSG00000165716.11	33.2047	0.554974	0.278401	1.99343	0.0462143	0.686586	DIPK1B
ENSG00000105443.15	1387.49	0.340055	0.170463	1.99489	0.0460549	0.686586	CYTH2
ENSG00000189077.11	971.145	0.400627	0.200659	1.99655	0.045874	0.686586	TMEM120A
ENSG00000146963.18	650.573	0.269786	0.135469	1.99149	0.046427	0.688148	LUC7L2
ENSG00000242276.2	18.5947	0.825958	0.414955	1.99047	0.0465387	0.68822	RPL5P3
ENSG00000163485.17	31.3689	-0.547716	0.27539	-1.98887	0.0467154	0.68822	ADORA1
ENSG00000253368.4	199.394	0.956993	0.480969	1.98972	0.0466221	0.68822	TRNP1
ENSG00000286785.1	15.8853	1.17447	0.59043	1.98919	0.0466808	0.68822	LINC01622
ENSG00000149043.16	26.8913	0.965911	0.485536	1.98937	0.0466605	0.68822	SYT8
ENSG00000120280.6	77.0936	-0.610318	0.306522	-1.99111	0.0464687	0.68822	CXorf21
ENSG00000250539.1	59.9793	0.635727	0.319582	1.98925	0.0466741	0.68822	KRT8P33
ENSG00000164733.22	25221.5	-0.494471	0.248487	-1.98993	0.0465985	0.68822	CTSB
ENSG00000123338.13	1025.85	-0.596415	0.299925	-1.98854	0.0467516	0.68823	NCKAP1L
ENSG00000187017.17	224.701	0.833972	0.419522	1.98791	0.0468219	0.688743	ESPN
ENSG00000182308.7	12.0218	-0.623166	0.313649	-1.98683	0.0469413	0.689455	DCAF4L1
ENSG00000165102.15	1511.79	0.369354	0.185891	1.98694	0.0469293	0.689455	HGSNAT
ENSG00000067191.16	108.924	0.592685	0.298573	1.98506	0.0471376	0.689729	CACNB1
ENSG00000272037.1	24.8207	0.622019	0.313313	1.98529	0.0471119	0.689729	AP002907.1
ENSG00000125733.18	1232.34	0.31498	0.15863	1.98563	0.0470746	0.689729	TRIP10
ENSG00000109320.13	1284.3	-0.258179	0.130002	-1.98597	0.0470371	0.689729	NFKB1
ENSG00000108684.15	10.4425	-1.49069	0.750493	-1.98628	0.0470018	0.689729	ASIC2
ENSG00000131142.13	12.503	-1.97156	0.99373	-1.984	0.0472555	0.690934	CCL25
ENSG00000105518.14	355.434	0.397529	0.20042	1.98348	0.047314	0.691268	TMEM205
ENSG00000160856.21	60.1821	-0.867628	0.437531	-1.98301	0.0473665	0.691515	FCRL3
ENSG00000136261.15	3468.92	0.338168	0.170584	1.98241	0.0474329	0.691553	BZW2
ENSG00000188315.8	120.179	-0.383347	0.193396	-1.98219	0.0474585	0.691553	C3orf62
ENSG00000167555.14	214.035	-0.697845	0.352086	-1.98203	0.0474759	0.691553	ZNF528
ENSG00000156219.17	44.9013	-1.21792	0.615087	-1.98008	0.047695	0.694223	ART3
ENSG00000112837.17	82.4727	-1.01117	0.510992	-1.97884	0.0478339	0.694842	TBX18
ENSG00000173894.11	270.552	0.726257	0.367183	1.97792	0.0479383	0.694842	CBX2
ENSG00000079739.17	977.797	-0.421368	0.21297	-1.97853	0.0478688	0.694842	PGM1
ENSG00000090382.7	13665.1	0.931114	0.470681	1.97823	0.047903	0.694842	LYZ
ENSG00000180773.15	359.592	-0.523403	0.264563	-1.97837	0.0478873	0.694842	SLC36A4
ENSG00000176148.16	245.281	-0.265104	0.13404	-1.97779	0.0479522	0.694842	TCP11L1
ENSG00000110328.6	183.437	-0.678962	0.343435	-1.97698	0.0480444	0.695141	GALNT18
ENSG00000164542.13	304.071	0.582835	0.294801	1.97704	0.0480368	0.695141	KIAA0895
ENSG00000214872.8	9.50742	-0.974157	0.493038	-1.97583	0.0481745	0.696242	SMTNL1
ENSG00000145246.14	659.957	-0.401926	0.203438	-1.97567	0.0481922	0.696242	ATP10D
ENSG00000163382.12	1373.78	0.269005	0.136238	1.97453	0.0483217	0.696914	NAXE
ENSG00000104537.17	903.763	1.0616	0.537705	1.97431	0.0483464	0.696914	ANXA13
ENSG00000180190.12	93.8006	-0.770026	0.389994	-1.97446	0.0483297	0.696914	TDRP
ENSG00000145794.17	15.7642	-1.01077	0.514062	-1.96625	0.04927	0.697592	MEGF10
ENSG00000253998.3	11.5762	-1.40219	0.712832	-1.96707	0.0491747	0.697592	IGKV2-29
ENSG00000090621.15	2152.93	0.278366	0.141209	1.97131	0.0486887	0.697592	PABPC4
ENSG00000282978.1	51.6566	0.562504	0.28605	1.96645	0.0492461	0.697592	AC110994.2
ENSG00000127366.5	19.9486	0.661781	0.336463	1.96688	0.0491973	0.697592	TAS2R5
ENSG00000162227.8	188.903	-0.256607	0.130312	-1.96917	0.0489338	0.697592	TAF6L
ENSG00000182578.14	952.814	-0.560001	0.284513	-1.96828	0.0490355	0.697592	CSF1R
ENSG00000259820.1	430.417	0.533004	0.270593	1.96976	0.0488654	0.697592	AC083843.2
ENSG00000184154.15	90.3603	-0.335235	0.170049	-1.9714	0.0486777	0.697592	LRTOMT
ENSG00000105855.10	1204.5	0.631933	0.321523	1.96544	0.0493635	0.697592	ITGB8
ENSG00000203710.12	82.1463	-0.722804	0.366581	-1.97174	0.0486388	0.697592	CR1
ENSG00000178075.20	315.36	0.596969	0.302666	1.97237	0.0485675	0.697592	GRAMD1C
ENSG00000105851.11	236.073	-0.568255	0.288884	-1.96707	0.0491755	0.697592	PIK3CG
ENSG00000148341.18	1923.74	0.286476	0.145402	1.97023	0.0488119	0.697592	SH3GLB2
ENSG00000173653.8	353.125	-0.261646	0.132843	-1.96959	0.0488857	0.697592	RCE1
ENSG00000198874.13	954.93	0.291369	0.147745	1.97211	0.0485971	0.697592	TYW1
ENSG00000210741.1	43.1016	-1.0593	0.538222	-1.96815	0.0490503	0.697592	MIR196A1
ENSG00000135077.9	404.688	-0.622414	0.316145	-1.96876	0.0489806	0.697592	HAVCR2
ENSG00000117091.10	165.279	-0.708319	0.359518	-1.97019	0.0488167	0.697592	CD48
ENSG00000237977.1	14.2516	0.781968	0.39734	1.96801	0.0490669	0.697592	EIF4HP2
ENSG00000261437.1	88.3408	0.593973	0.30217	1.96569	0.0493342	0.697592	AC108860.2
ENSG00000137522.18	576.308	-0.255158	0.129598	-1.96884	0.0489714	0.697592	RNF121
ENSG00000110195.14	77.9383	1.47772	0.751784	1.96562	0.0493422	0.697592	FOLR1
ENSG00000235552.4	448.315	0.606248	0.308179	1.9672	0.0491606	0.697592	RPL6P27
ENSG00000119599.17	381.999	0.315622	0.159929	1.97351	0.0484372	0.697592	DCAF4
ENSG00000132669.13	1501.9	0.485261	0.246186	1.97112	0.0487105	0.697592	RIN2
ENSG00000120860.11	1093.73	0.417159	0.211966	1.96805	0.0490625	0.697592	WASHC3
ENSG00000060656.20	247.177	0.988104	0.503513	1.96242	0.0497135	0.698116	PTPRU
ENSG00000246223.9	27.4667	1.05909	0.539652	1.96254	0.0496992	0.698116	LINC01550
ENSG00000011201.12	424.173	-0.832657	0.424062	-1.96353	0.0495852	0.698116	ANOS1
ENSG00000144161.13	588.23	0.274568	0.139809	1.96387	0.0495448	0.698116	ZC3H8
ENSG00000124233.12	39.0856	-1.96253	0.999545	-1.96343	0.0495968	0.698116	SEMG1
ENSG00000165195.16	610.853	-0.351874	0.179314	-1.96233	0.0497242	0.698116	PIGA
ENSG00000137265.15	163.548	-0.776199	0.395459	-1.96278	0.0496715	0.698116	IRF4
ENSG00000230383.1	78.9619	0.635289	0.323687	1.96267	0.049685	0.698116	AC009245.1
ENSG00000277998.1	66.3139	0.625123	0.318395	1.96336	0.0496046	0.698116	AC107075.1
ENSG00000164850.15	38.2614	0.931612	0.474949	1.9615	0.0498209	0.698491	GPER1
ENSG00000164076.17	17.6445	1.68362	0.859799	1.95816	0.0502114	0.698491	CAMKV
ENSG00000109089.7	265.418	0.497271	0.253891	1.9586	0.0501598	0.698491	CDR2L
ENSG00000161179.14	545.595	0.349156	0.178314	1.9581	0.0502185	0.698491	YDJC
ENSG00000134183.12	15.2238	-0.750717	0.383289	-1.95862	0.0501578	0.698491	GNAT2
ENSG00000177807.10	23.3943	-0.773446	0.394727	-1.95945	0.0500606	0.698491	KCNJ10
ENSG00000185338.6	76.5103	-0.512741	0.261606	-1.95997	0.049999	0.698491	SOCS1
ENSG00000280202.1	164.001	-0.675745	0.344862	-1.95947	0.0500583	0.698491	AC005831.1
ENSG00000102010.15	58.5924	-0.78242	0.399114	-1.96039	0.0499498	0.698491	BMX
ENSG00000260996.1	14.7806	-0.940068	0.479856	-1.95906	0.0501052	0.698491	BX255925.1
ENSG00000213598.4	92.119	0.617208	0.315108	1.95872	0.0501461	0.698491	AL049873.1
ENSG00000099866.15	18.7146	0.896528	0.457116	1.96127	0.0498477	0.698491	MADCAM1
ENSG00000088827.12	175.049	-0.639712	0.326526	-1.95915	0.0500956	0.698491	SIGLEC1
ENSG00000248323.7	124.185	-0.822609	0.420253	-1.95741	0.0502991	0.69911	LUCAT1
ENSG00000142676.14	31645.3	0.414168	0.211768	1.95577	0.0504925	0.699128	RPL11
ENSG00000188818.12	62.3818	0.888472	0.454475	1.95494	0.0505901	0.699128	ZDHHC11
ENSG00000187624.9	25.7823	-0.713033	0.364729	-1.95497	0.0505871	0.699128	C17orf97
ENSG00000233038.6	14.8592	-0.632094	0.323338	-1.9549	0.0505947	0.699128	PTPRN2-AS1
ENSG00000091181.20	25.4152	-0.934259	0.477935	-1.95478	0.0506085	0.699128	IL5RA
ENSG00000211654.2	31.3827	-1.81176	0.926988	-1.95445	0.0506477	0.699128	IGLV5-37
ENSG00000186889.10	72.3814	0.431353	0.220715	1.95435	0.0506604	0.699128	TMEM17
ENSG00000159374.17	11.6909	-1.07244	0.548119	-1.95658	0.0503964	0.699128	M1AP
ENSG00000105290.13	18.5702	0.941086	0.481303	1.95529	0.0505491	0.699128	APLP1
ENSG00000181847.12	200.92	-0.706542	0.361026	-1.95704	0.0503431	0.699128	TIGIT
ENSG00000203706.8	40.3696	0.607105	0.310744	1.95372	0.0507347	0.699483	SERTAD4-AS1
ENSG00000145860.12	2225.29	-0.339345	0.173728	-1.95331	0.0507827	0.699483	RNF145
ENSG00000092871.17	650.94	-0.369646	0.18925	-1.95321	0.0507942	0.699483	RFFL
ENSG00000183248.12	51.4592	1.174	0.601286	1.95248	0.0508818	0.700052	PRR36
ENSG00000213888.3	17.986	0.439255	0.224998	1.95226	0.0509076	0.700052	LINC01521
ENSG00000273716.2	13.5412	0.968437	0.49626	1.95147	0.0510011	0.700841	AC092670.1
ENSG00000161981.11	533.795	-0.388511	0.19929	-1.94947	0.0512389	0.701626	SNRNP25
ENSG00000197646.8	164.062	-0.780799	0.400381	-1.95014	0.0511594	0.701626	PDCD1LG2
ENSG00000272636.4	159.51	-0.930097	0.477067	-1.94961	0.0512221	0.701626	DOC2B
ENSG00000240616.1	76.8564	0.595427	0.30538	1.94979	0.0512015	0.701626	RPS6P25
ENSG00000137496.18	315.555	-0.566045	0.290212	-1.95045	0.0511223	0.701626	IL18BP
ENSG00000104983.8	207.168	0.301851	0.154864	1.94913	0.0512803	0.701698	CCDC61
ENSG00000126458.4	887.069	0.285466	0.14661	1.94711	0.0515214	0.703859	RRAS
ENSG00000103313.13	57.1246	-0.745567	0.382885	-1.94724	0.0515066	0.703859	MEFV
ENSG00000111671.10	237.508	0.428258	0.219969	1.9469	0.051547	0.703859	SPSB2
ENSG00000267288.2	11.1286	0.8301	0.426735	1.94523	0.0517467	0.705855	AC138150.2
ENSG00000153885.14	418.09	0.557516	0.28663	1.94508	0.0517658	0.705855	KCTD15
ENSG00000158636.16	526.575	-0.378073	0.194454	-1.94428	0.0518613	0.706196	EMSY
ENSG00000148803.12	295.419	0.64368	0.331066	1.94426	0.0518636	0.706196	FUOM
ENSG00000066468.23	357.427	0.771162	0.396822	1.94335	0.0519744	0.707208	FGFR2
ENSG00000238172.2	10.5036	1.33016	0.684738	1.94258	0.0520665	0.707471	RPS2P35
ENSG00000139132.14	1089.63	-0.32905	0.169367	-1.94282	0.052038	0.707471	FGD4
ENSG00000158373.8	281.956	0.63319	0.326051	1.942	0.0521377	0.707481	H2BC5
ENSG00000169641.13	1543.11	-0.339898	0.175027	-1.94197	0.0521401	0.707481	LUZP1
ENSG00000075420.13	2291.06	-0.313794	0.161679	-1.94085	0.0522765	0.708341	FNDC3B
ENSG00000150637.9	145.728	-0.722911	0.372447	-1.94098	0.0522609	0.708341	CD226
ENSG00000173264.15	305.576	-0.331246	0.170779	-1.93962	0.0524254	0.709863	GPR137
ENSG00000109466.14	573.377	-0.330865	0.17065	-1.93885	0.0525199	0.710648	KLHL2
ENSG00000104093.14	1441.12	-0.40102	0.207341	-1.93411	0.0530991	0.712061	DMXL2
ENSG00000170965.10	14.4985	-1.51653	0.783965	-1.93444	0.0530594	0.712061	PLAC1
ENSG00000184922.14	267.662	-0.586913	0.3034	-1.93445	0.0530574	0.712061	FMNL1
ENSG00000226887.8	63.3233	1.22816	0.634519	1.93557	0.0529202	0.712061	ERVMER34-1
ENSG00000247137.9	64.5706	-0.478373	0.24728	-1.93454	0.0530469	0.712061	AP000873.2
ENSG00000180902.18	485.5	0.540286	0.279348	1.9341	0.0531011	0.712061	D2HGDH
ENSG00000172061.9	237.983	-0.936309	0.483377	-1.93702	0.0527434	0.712061	LRRC15
ENSG00000123684.13	3068.75	-0.351311	0.181551	-1.93506	0.0529835	0.712061	LPGAT1
ENSG00000142875.19	2222.4	0.649098	0.335159	1.93669	0.0527833	0.712061	PRKACB
ENSG00000279722.1	31.7983	0.412141	0.212774	1.93699	0.0527468	0.712061	AC007342.7
ENSG00000189171.14	288.505	0.561887	0.290198	1.93622	0.0528407	0.712061	S100A13
ENSG00000227507.3	209.011	-0.622803	0.321698	-1.93598	0.0528696	0.712061	LTB
ENSG00000165188.13	112.311	-0.779861	0.402875	-1.93574	0.0528997	0.712061	RNF183
ENSG00000105376.5	14.4895	0.85662	0.443373	1.93205	0.0533531	0.712126	ICAM5
ENSG00000158623.14	1128.17	0.431777	0.223594	1.93107	0.053474	0.712126	COPG2
ENSG00000211965.4	255.106	-1.15267	0.596379	-1.93279	0.0532625	0.712126	IGHV3-49
ENSG00000120533.13	1761.09	0.361842	0.187398	1.93087	0.0534986	0.712126	ENY2
ENSG00000136002.20	77.8944	1.14693	0.59341	1.93278	0.0532635	0.712126	ARHGEF4
ENSG00000166501.14	228.503	-0.626943	0.324708	-1.93079	0.0535094	0.712126	PRKCB
ENSG00000211794.3	10.2044	-0.887649	0.459538	-1.93161	0.0534073	0.712126	TRAV12-3
ENSG00000172551.11	8.03009	-1.88863	0.97808	-1.93096	0.0534885	0.712126	MUCL1
ENSG00000140396.13	1476.26	0.357811	0.18515	1.93254	0.0532926	0.712126	NCOA2
ENSG00000141084.11	723.485	0.491224	0.254229	1.93221	0.0533336	0.712126	RANBP10
ENSG00000198610.11	35.1232	1.50771	0.780324	1.93216	0.0533393	0.712126	AKR1C4
ENSG00000183662.11	22.8526	-0.936672	0.485885	-1.92777	0.0538843	0.712249	TAFA1
ENSG00000158106.14	406.832	0.624966	0.323863	1.92973	0.0536408	0.712249	RHPN1
ENSG00000105193.9	21601.1	0.406337	0.210773	1.92784	0.0538752	0.712249	RPS16
ENSG00000136634.7	18.3437	-0.731717	0.37973	-1.92694	0.0539873	0.712249	IL10
ENSG00000117595.12	2072.48	0.290256	0.150614	1.92715	0.0539607	0.712249	IRF6
ENSG00000176896.8	105.944	-0.37102	0.19258	-1.92658	0.0540322	0.712249	TCEANC
ENSG00000147471.12	1576.51	-0.361611	0.18742	-1.92941	0.0536795	0.712249	PLPBP
ENSG00000073921.18	4847.63	-0.196273	0.101865	-1.9268	0.0540048	0.712249	PICALM
ENSG00000186407.7	164.094	-0.91162	0.47247	-1.92948	0.0536715	0.712249	CD300E
ENSG00000177302.15	536.784	-0.340777	0.176859	-1.92683	0.0540005	0.712249	TOP3A
ENSG00000162757.4	177.234	0.332133	0.17235	1.92709	0.053969	0.712249	C1orf74
ENSG00000106400.12	1761.98	0.314607	0.163004	1.93006	0.0535999	0.712249	ZNHIT1
ENSG00000232815.1	10.5795	-0.645822	0.335134	-1.92706	0.0539725	0.712249	DUX4L50
ENSG00000204287.14	22379.8	-0.721539	0.374438	-1.92699	0.0539809	0.712249	HLA-DRA
ENSG00000147604.14	46747.9	0.452532	0.234962	1.92598	0.0541071	0.712641	RPL7
ENSG00000101082.14	67.1197	-0.660726	0.3431	-1.92575	0.0541353	0.712641	SLA2
ENSG00000051128.19	117.009	0.515437	0.267807	1.92466	0.0542718	0.71347	HOMER3
ENSG00000117461.15	445.77	-0.327169	0.169976	-1.9248	0.0542546	0.71347	PIK3R3
ENSG00000008282.9	5046.85	0.327951	0.170426	1.9243	0.0543175	0.713588	SYPL1
ENSG00000245970.2	51.1269	0.471257	0.244951	1.92388	0.0543694	0.713787	AP003352.1
ENSG00000107404.20	1473	0.351148	0.182561	1.92346	0.0544226	0.714003	DVL1
ENSG00000169857.9	428.692	0.402217	0.209161	1.923	0.0544806	0.71428	AVEN
ENSG00000137936.18	377.48	0.417087	0.216966	1.92236	0.0545606	0.714436	BCAR3
ENSG00000167208.15	215.022	-0.660729	0.34382	-1.92173	0.0546396	0.714436	SNX20
ENSG00000136167.15	3926.94	-0.593192	0.308638	-1.92196	0.0546102	0.714436	LCP1
ENSG00000173762.8	84.1867	-0.734802	0.382259	-1.92226	0.0545727	0.714436	CD7
ENSG00000271856.1	18.088	-0.890071	0.463659	-1.91967	0.0548999	0.714472	LINC01215
ENSG00000175854.14	367.21	0.29875	0.155568	1.92038	0.0548097	0.714472	SWI5
ENSG00000279838.1	22.9121	-0.604593	0.314807	-1.92052	0.0547918	0.714472	AL356273.3
ENSG00000155158.20	1304.27	-0.41614	0.216689	-1.92045	0.054801	0.714472	TTC39B
ENSG00000270049.3	60.4424	-0.394293	0.205306	-1.92051	0.0547936	0.714472	AC009061.2
ENSG00000173020.11	3169.78	-0.27868	0.145152	-1.91992	0.054868	0.714472	GRK2
ENSG00000215817.7	26.6201	0.4856	0.252905	1.92009	0.0548461	0.714472	ZC3H11B
ENSG00000273387.1	10.9221	0.713316	0.373144	1.91164	0.0559228	0.714708	AC005005.3
ENSG00000286646.1	25.9355	-0.716008	0.374141	-1.91374	0.0556536	0.714708	AL121933.2
ENSG00000231246.2	42.44	-0.724072	0.37885	-1.91123	0.0559744	0.714708	LINC02884
ENSG00000175928.6	102.987	1.21595	0.634473	1.91647	0.0553054	0.714708	LRRN1
ENSG00000156467.10	4954.87	0.41812	0.218049	1.91755	0.0551682	0.714708	UQCRB
ENSG00000151445.16	624.107	0.244086	0.127774	1.91029	0.0560959	0.714708	VIPAS39
ENSG00000170498.9	12.6401	1.14504	0.599256	1.91078	0.0560334	0.714708	KISS1
ENSG00000116704.8	1796.64	-0.379793	0.198388	-1.9144	0.0555693	0.714708	SLC35D1
ENSG00000104497.14	308.673	0.35408	0.185152	1.91238	0.0558274	0.714708	SNX16
ENSG00000185269.12	821.756	1.78899	0.933256	1.91693	0.0552463	0.714708	NOTUM
ENSG00000102878.17	218.105	0.639811	0.334783	1.91112	0.0559891	0.714708	HSF4
ENSG00000196378.13	140.469	0.402579	0.209898	1.91797	0.0551146	0.714708	ZNF34
ENSG00000186827.11	73.2989	-0.551567	0.28814	-1.91424	0.0555899	0.714708	TNFRSF4
ENSG00000073670.14	10.1554	0.765118	0.399031	1.91744	0.0551818	0.714708	ADAM11
ENSG00000268027.5	27.4342	-0.691762	0.361567	-1.91323	0.0557181	0.714708	AC243960.1
ENSG00000165171.11	153.107	0.824487	0.431552	1.91051	0.056067	0.714708	METTL27
ENSG00000155307.19	586.127	-0.675694	0.35264	-1.9161	0.055352	0.714708	SAMSN1
ENSG00000151062.15	161.809	0.825893	0.431821	1.91258	0.0558018	0.714708	CACNA2D4
ENSG00000182795.13	1136.41	0.471606	0.246362	1.91428	0.0555844	0.714708	C1orf116
ENSG00000110583.13	577.249	-0.289544	0.151453	-1.91178	0.055905	0.714708	NAA40
ENSG00000167851.15	332.442	-0.512896	0.268318	-1.91152	0.0559376	0.714708	CD300A
ENSG00000176105.14	2376.69	-0.36218	0.188827	-1.91805	0.0551049	0.714708	YES1
ENSG00000173933.21	331.1	-0.369999	0.193013	-1.91697	0.0552422	0.714708	RBM4
ENSG00000100099.21	1047.62	0.366882	0.19158	1.91503	0.0554887	0.714708	HPS4
ENSG00000158055.16	131.445	0.931443	0.486944	1.91283	0.0557693	0.714708	GRHL3
ENSG00000122644.13	1593.73	0.452992	0.236923	1.91198	0.0558786	0.714708	ARL4A
ENSG00000063177.13	21209	0.319075	0.166264	1.91909	0.0549728	0.714708	RPL18
ENSG00000213949.10	2860.49	-0.313459	0.163382	-1.91857	0.0550385	0.714708	ITGA1
ENSG00000115042.10	495.059	0.223872	0.117089	1.91198	0.0558784	0.714708	FAHD2A
ENSG00000148218.16	1062.75	0.236627	0.123788	1.91155	0.055934	0.714708	ALAD
ENSG00000179978.11	23.0297	-0.543795	0.284059	-1.91437	0.0555729	0.714708	NAIPP2
ENSG00000234004.4	12.7096	0.864791	0.452062	1.91299	0.0557488	0.714708	AC092017.1
ENSG00000116857.17	1783.45	0.361901	0.189493	1.90984	0.056154	0.714979	TMEM9
ENSG00000184809.13	37.3718	-1.16177	0.608549	-1.90908	0.0562517	0.715284	B3GALT5-AS1
ENSG00000100429.18	17.7159	0.539299	0.282471	1.90922	0.0562339	0.715284	HDAC10
ENSG00000131389.17	2820.59	-0.707844	0.370955	-1.90816	0.0563699	0.716319	SLC6A6
ENSG00000226312.7	24.8724	-0.571375	0.299526	-1.9076	0.0564433	0.716782	CFLAR-AS1
ENSG00000166589.13	13.2258	1.47276	0.772191	1.90725	0.0564882	0.716883	CDH16
ENSG00000170421.12	64993.7	0.499595	0.262239	1.90511	0.0567657	0.717786	KRT8
ENSG00000163684.12	257.951	-0.302954	0.159067	-1.90457	0.0568358	0.717786	RPP14
ENSG00000226396.1	62.6289	0.603317	0.317081	1.90272	0.0570769	0.717786	AL031727.1
ENSG00000171488.15	368.315	-0.427833	0.224826	-1.90295	0.0570464	0.717786	LRRC8C
ENSG00000141441.16	363.006	0.385692	0.202412	1.90548	0.0567179	0.717786	GAREM1
ENSG00000231550.1	7.65413	-1.3376	0.702479	-1.90411	0.0568952	0.717786	PTCHD3P2
ENSG00000171311.13	661.427	0.336967	0.177086	1.90285	0.0570601	0.717786	EXOSC1
ENSG00000233670.7	14.1049	1.11385	0.585285	1.90309	0.0570287	0.717786	PIRT
ENSG00000253123.4	16.9542	-0.77944	0.409615	-1.90286	0.0570588	0.717786	AC091182.1
ENSG00000146094.15	181.115	-0.502521	0.263671	-1.90586	0.056668	0.717786	DOK3
ENSG00000078579.9	29.6448	-1.89528	0.99499	-1.90482	0.0568028	0.717786	FGF20
ENSG00000205414.1	13.925	1.42584	0.749105	1.90339	0.0569897	0.717786	AC007608.1
ENSG00000095713.14	15.1748	1.07091	0.562478	1.90392	0.0569206	0.717786	CRTAC1
ENSG00000167257.11	281.168	-0.303991	0.159508	-1.9058	0.0566763	0.717786	RNF214
ENSG00000106536.21	24.3044	1.85381	0.974894	1.90155	0.0572305	0.718564	POU6F2
ENSG00000126561.17	714.34	-0.314634	0.165475	-1.9014	0.0572498	0.718564	STAT5A
ENSG00000126218.12	130.002	1.00462	0.528255	1.90178	0.0572	0.718564	F10
ENSG00000078018.20	50.1996	0.598442	0.314889	1.90049	0.057369	0.719595	MAP2
ENSG00000135775.14	1116.11	0.288919	0.152077	1.89982	0.0574563	0.720225	COG2
ENSG00000119408.17	1598.65	-0.38151	0.200906	-1.89895	0.057571	0.720268	NEK6
ENSG00000166471.11	1080.17	-0.31881	0.167865	-1.89921	0.0575373	0.720268	TMEM41B
ENSG00000196352.16	5793.59	-0.86646	0.456165	-1.89944	0.0575061	0.720268	CD55
ENSG00000211941.3	448.271	-1.14233	0.602195	-1.89695	0.0578348	0.72032	IGHV3-11
ENSG00000119950.21	1072.62	0.312651	0.164811	1.89703	0.0578241	0.72032	MXI1
ENSG00000105819.14	2018.1	0.218829	0.11535	1.8971	0.0578153	0.72032	PMPCB
ENSG00000284691.1	204.884	0.515656	0.271647	1.89826	0.0576623	0.72032	AC073111.3
ENSG00000110906.13	1845.85	-0.269401	0.141947	-1.8979	0.0577098	0.72032	KCTD10
ENSG00000237380.7	21.2821	0.855692	0.450842	1.89799	0.0576979	0.72032	HOXD-AS2
ENSG00000170791.18	1207.03	0.374203	0.197257	1.89703	0.0578239	0.72032	CHCHD7
ENSG00000137478.15	588.995	-0.253084	0.133525	-1.8954	0.0580397	0.722408	FCHSD2
ENSG00000036672.16	21.7185	-0.857292	0.452457	-1.89475	0.058126	0.723019	USP2
ENSG00000047662.5	12.3508	-0.896234	0.473409	-1.89315	0.0583381	0.723365	FAM184B
ENSG00000197405.8	437.298	-0.637146	0.336706	-1.89229	0.0584519	0.723365	C5AR1
ENSG00000276231.5	51.7693	-0.59405	0.313621	-1.89416	0.0582032	0.723365	PIK3R6
ENSG00000167618.10	21.4199	-0.970819	0.512816	-1.89312	0.0583425	0.723365	LAIR2
ENSG00000205579.3	13.5807	0.751982	0.397373	1.89238	0.0584401	0.723365	DYNLL1P1
ENSG00000288538.1	10.1572	-0.763798	0.403296	-1.89389	0.0582401	0.723365	AP002985.1
ENSG00000259664.3	11.5116	1.38329	0.73051	1.8936	0.058278	0.723365	LINC02254
ENSG00000091262.16	233.515	0.786479	0.415567	1.89255	0.0584183	0.723365	ABCC6
ENSG00000255240.6	21.4639	-1.19664	0.632494	-1.89193	0.0584996	0.723495	AP001636.3
ENSG00000142765.18	455.241	0.75659	0.399965	1.89164	0.0585391	0.723523	SYTL1
ENSG00000081237.20	2814.49	-0.618171	0.326945	-1.89075	0.0586577	0.723538	PTPRC
ENSG00000149480.7	2090.81	-0.248184	0.13127	-1.89064	0.0586728	0.723538	MTA2
ENSG00000111913.20	239.299	-0.59814	0.316341	-1.89081	0.0586499	0.723538	RIPOR2
ENSG00000145332.14	769.011	-0.295245	0.156172	-1.89051	0.0586894	0.723538	KLHL8
ENSG00000239975.2	31.7577	-1.1757	0.622071	-1.88998	0.0587605	0.723674	IGKV1D-33
ENSG00000229689.3	52.2092	-0.958327	0.507218	-1.88938	0.0588411	0.723674	AC009237.3
ENSG00000163191.6	8732.24	0.363769	0.192496	1.88974	0.0587924	0.723674	S100A11
ENSG00000066735.14	108.705	1.03654	0.548635	1.88932	0.0588495	0.723674	KIF26A
ENSG00000135272.12	644.781	-0.525332	0.278109	-1.88894	0.0588998	0.723834	MDFIC
ENSG00000211734.3	21.7874	-0.798901	0.423087	-1.88827	0.0589903	0.724487	TRBV5-1
ENSG00000147854.17	1813.18	0.217904	0.115433	1.8877	0.0590657	0.724497	UHRF2
ENSG00000118777.12	123.97	0.731003	0.387237	1.88774	0.0590609	0.724497	ABCG2
ENSG00000141505.12	63.3276	-0.801466	0.424649	-1.88736	0.0591121	0.724512	ASGR1
ENSG00000266709.1	9.8655	-0.894434	0.474102	-1.88658	0.0592162	0.724512	AC005224.3
ENSG00000102962.5	71.3435	-0.689834	0.365568	-1.88702	0.0591578	0.724512	CCL22
ENSG00000147676.14	7374.07	0.504893	0.267605	1.88671	0.0591993	0.724512	MAL2
ENSG00000235169.11	13.5225	0.812556	0.430798	1.88616	0.0592729	0.724602	SMIM1
ENSG00000175938.7	113.59	0.290278	0.153914	1.88598	0.0592982	0.724602	ORAI3
ENSG00000160766.14	81.2106	0.413413	0.219301	1.88514	0.0594107	0.72552	GBAP1
ENSG00000140931.20	536.398	-0.486173	0.25808	-1.88381	0.059591	0.727265	CMTM3
ENSG00000136842.14	32.8245	0.682024	0.362165	1.88319	0.0596747	0.727686	TMOD1
ENSG00000273066.5	81.2553	0.886877	0.470992	1.883	0.0597004	0.727686	AL355987.4
ENSG00000139193.4	54.3911	-0.563893	0.299596	-1.88218	0.0598117	0.728585	CD27
ENSG00000090447.12	426.443	0.322796	0.171556	1.88157	0.0598942	0.728627	TFAP4
ENSG00000186431.19	47.3105	-0.973653	0.517536	-1.88133	0.0599277	0.728627	FCAR
ENSG00000178035.13	6667.16	0.32295	0.171616	1.88182	0.0598599	0.728627	IMPDH2
ENSG00000276600.5	104.814	-0.50024	0.265993	-1.88065	0.0600194	0.728829	RAB7B
ENSG00000242580.1	10.5802	-1.71135	0.909968	-1.88067	0.0600165	0.728829	IGKV1D-43
ENSG00000113273.17	392.827	-0.52732	0.280584	-1.87936	0.0601948	0.728886	ARSB
ENSG00000232869.2	16.9385	-0.948829	0.504941	-1.87909	0.0602322	0.728886	TRBV29-1
ENSG00000176438.12	157.273	-0.506208	0.269297	-1.87974	0.0601436	0.728886	SYNE3
ENSG00000204103.4	396.531	-0.555371	0.295495	-1.87946	0.0601817	0.728886	MAFB
ENSG00000090581.10	888.308	0.23724	0.126261	1.87896	0.0602494	0.728886	GNPTG
ENSG00000179886.6	177.071	0.367458	0.195455	1.88001	0.0601067	0.728886	TIGD5
ENSG00000237111.1	30.8006	-1.03644	0.55184	-1.87815	0.0603613	0.72941	IGHJ3P
ENSG00000144214.10	30.4515	-0.649626	0.345896	-1.8781	0.0603678	0.72941	LYG1
ENSG00000186130.5	673.423	0.32681	0.17404	1.87779	0.0604097	0.729463	ZBTB6
ENSG00000130818.12	496.608	0.517763	0.275852	1.87696	0.0605233	0.729921	ZNF426
ENSG00000143374.17	728.604	0.349674	0.186325	1.87669	0.0605604	0.729921	TARS2
ENSG00000167632.18	529.865	0.534013	0.2845	1.87702	0.0605147	0.729921	TRAPPC9
ENSG00000206557.6	9.95329	-1.92405	1.02708	-1.87333	0.0610228	0.73051	TRIM71
ENSG00000113749.7	64.0207	-0.661366	0.353046	-1.87332	0.0610249	0.73051	HRH2
ENSG00000011376.12	908.84	-0.442222	0.236173	-1.87245	0.0611447	0.73051	LARS2
ENSG00000204397.8	369.895	-0.495966	0.265175	-1.87034	0.0614371	0.73051	CARD16
ENSG00000198105.15	465.804	0.217831	0.116282	1.87329	0.0610279	0.73051	ZNF248
ENSG00000168421.13	260.363	-0.69087	0.368606	-1.87428	0.0608921	0.73051	RHOH
ENSG00000140650.12	589.512	-0.284544	0.152109	-1.87066	0.0613926	0.73051	PMM2
ENSG00000128564.7	20.7062	1.09741	0.586607	1.87078	0.0613759	0.73051	VGF
ENSG00000117625.14	856.719	0.272373	0.145264	1.87501	0.0607909	0.73051	RCOR3
ENSG00000260027.5	560.899	-0.464622	0.247889	-1.87432	0.0608866	0.73051	HOXB7
ENSG00000253919.1	20.415	-0.502644	0.268522	-1.87189	0.0612222	0.73051	THAP12P7
ENSG00000185245.8	20.7447	-0.611051	0.326511	-1.87146	0.0612814	0.73051	GP1BA
ENSG00000082641.16	4036.95	-0.266074	0.142025	-1.87344	0.061008	0.73051	NFE2L1
ENSG00000132429.10	15.3895	1.0673	0.570573	1.87059	0.0614026	0.73051	POPDC3
ENSG00000128710.6	144.552	1.15887	0.618947	1.87232	0.0611622	0.73051	HOXD10
ENSG00000198938.2	469617	0.406437	0.217189	1.87135	0.0612969	0.73051	MT-CO3
ENSG00000177125.5	446.909	0.242608	0.129399	1.87488	0.0608089	0.73051	ZBTB34
ENSG00000108786.11	11.9605	-1.11332	0.595181	-1.87055	0.0614075	0.73051	HSD17B1
ENSG00000003137.8	36.4468	0.763813	0.407806	1.87298	0.0610711	0.73051	CYP26B1
ENSG00000120327.6	149.791	-0.650736	0.34701	-1.87527	0.0607562	0.73051	PCDHB14
ENSG00000187688.15	207.042	-0.406785	0.217384	-1.87128	0.0613065	0.73051	TRPV2
ENSG00000003096.14	238.303	-0.996706	0.532463	-1.87188	0.0612236	0.73051	KLHL13
ENSG00000180921.7	1588.12	0.51698	0.27651	1.86966	0.0615314	0.731184	FAM83H
ENSG00000124256.15	194.217	-0.518139	0.277245	-1.86889	0.0616388	0.731703	ZBP1
ENSG00000118514.14	10.7982	-0.872548	0.466902	-1.8688	0.0616504	0.731703	ALDH8A1
ENSG00000135312.7	9.4544	-0.719307	0.385054	-1.86807	0.0617529	0.732471	HTR1B
ENSG00000163563.8	500.194	-0.667868	0.358001	-1.86555	0.0621045	0.733131	MNDA
ENSG00000106211.10	3123.35	0.472724	0.253362	1.86581	0.0620682	0.733131	HSPB1
ENSG00000082068.9	879.322	0.293514	0.157324	1.86566	0.0620888	0.733131	WDR70
ENSG00000260022.1	11.2783	0.746273	0.399729	1.86695	0.0619089	0.733131	AL031716.1
ENSG00000279227.1	20.4151	-0.518462	0.277947	-1.86532	0.062136	0.733131	AC009303.4
ENSG00000132854.19	42.3362	1.03039	0.552108	1.86628	0.0620016	0.733131	KANK4
ENSG00000138085.17	2277.46	0.331957	0.177964	1.86531	0.0621386	0.733131	ATRAID
ENSG00000167995.17	70.9908	-0.424463	0.227596	-1.86498	0.062184	0.733131	BEST1
ENSG00000073849.16	3196.08	-0.717716	0.384841	-1.86497	0.0621861	0.733131	ST6GAL1
ENSG00000256039.2	21.3229	-1.05009	0.562453	-1.86699	0.0619035	0.733131	LINC02446
ENSG00000109171.15	1540.48	-0.220804	0.118414	-1.86468	0.0622261	0.733157	SLAIN2
ENSG00000172005.11	10.3047	0.924814	0.496138	1.86403	0.062318	0.733796	MAL
ENSG00000244926.7	10.2392	-0.57242	0.307284	-1.86284	0.0624854	0.733986	ALKBH3-AS1
ENSG00000196150.14	344.111	0.39404	0.21152	1.86289	0.0624776	0.733986	ZNF250
ENSG00000197859.11	107.48	0.783971	0.420791	1.86309	0.0624502	0.733986	ADAMTSL2
ENSG00000214485.6	272.903	0.673556	0.361477	1.86334	0.0624139	0.733986	RPL7P1
ENSG00000119862.13	586.834	0.299013	0.160551	1.86242	0.0625436	0.734226	LGALSL
ENSG00000105426.17	135.073	0.800662	0.430099	1.86158	0.0626628	0.735181	PTPRS
ENSG00000155886.11	19.8341	1.01176	0.543631	1.86112	0.0627278	0.735498	SLC24A2
ENSG00000116977.19	1645.88	0.307373	0.16518	1.86083	0.0627677	0.735523	LGALS8
ENSG00000249307.7	15.6186	0.631269	0.339778	1.85789	0.0631852	0.735721	LINC01088
ENSG00000147526.20	4419.04	0.533716	0.287508	1.85635	0.0634037	0.735721	TACC1
ENSG00000091482.8	23.9321	1.24853	0.672567	1.85636	0.0634017	0.735721	SMPX
ENSG00000144837.9	203.426	-0.594519	0.320265	-1.85633	0.0634061	0.735721	PLA1A
ENSG00000239653.1	28.5944	-0.555372	0.299278	-1.85571	0.0634955	0.735721	PSMD6-AS2
ENSG00000110047.18	964.686	-0.34162	0.184068	-1.85594	0.0634615	0.735721	EHD1
ENSG00000091106.19	92.9517	-0.543482	0.292644	-1.85714	0.0632906	0.735721	NLRC4
ENSG00000172053.18	6754.61	0.261356	0.140785	1.85642	0.0633936	0.735721	QARS1
ENSG00000150893.11	306.531	1.57556	0.848911	1.85598	0.0634561	0.735721	FREM2
ENSG00000236552.2	1121.44	0.537946	0.289494	1.85823	0.0631365	0.735721	RPL13AP5
ENSG00000245025.3	19.6147	-0.56023	0.301442	-1.8585	0.063098	0.735721	AC107959.1
ENSG00000186480.13	2458.58	-0.490341	0.263864	-1.85831	0.063125	0.735721	INSIG1
ENSG00000168874.13	101.122	0.732166	0.394269	1.85702	0.0633078	0.735721	ATOH8
ENSG00000138185.20	1272.8	-0.303372	0.163083	-1.86023	0.0628527	0.735721	ENTPD1
ENSG00000105122.13	144.176	-0.541563	0.291201	-1.85976	0.0629197	0.735721	RASAL3
ENSG00000138386.17	1699.31	0.357658	0.192604	1.85696	0.0633166	0.735721	NAB1
ENSG00000162894.12	123.971	-0.605607	0.32636	-1.85564	0.0635045	0.735721	FCMR
ENSG00000223806.8	41.6176	-0.963662	0.518772	-1.85758	0.0632282	0.735721	LINC00114
ENSG00000197448.14	5539.41	0.342329	0.184317	1.85728	0.0632707	0.735721	GSTK1
ENSG00000170734.12	572.345	-0.323688	0.174534	-1.85458	0.0636566	0.735811	POLH
ENSG00000213203.3	85.9987	-0.503352	0.271308	-1.85528	0.0635566	0.735811	GIMAP1
ENSG00000257103.8	3158.77	0.220721	0.119017	1.85453	0.0636639	0.735811	LSM14A
ENSG00000145949.11	39.9144	-0.73554	0.396514	-1.85502	0.0635939	0.735811	MYLK4
ENSG00000236431.1	10.4334	-1.08369	0.58453	-1.85395	0.0637461	0.736039	AC009237.8
ENSG00000185650.10	3763.38	0.529429	0.285582	1.85386	0.0637595	0.736039	ZFP36L1
ENSG00000164619.10	43.9668	-1.11833	0.603499	-1.85307	0.0638723	0.736904	BMPER
ENSG00000261121.2	20.5811	1.09084	0.588884	1.85238	0.0639707	0.737234	LINC02473
ENSG00000071246.11	355.255	-0.410733	0.221737	-1.85234	0.0639769	0.737234	VASH1
ENSG00000189423.13	40.6652	-0.564482	0.304803	-1.85196	0.0640321	0.737433	USP32P3
ENSG00000140749.9	587.387	-0.613306	0.331262	-1.85142	0.0641092	0.737882	IGSF6
ENSG00000260948.1	32.2873	-0.687206	0.371283	-1.8509	0.0641841	0.738308	AL390195.2
ENSG00000147166.11	25.5153	0.467333	0.252602	1.85008	0.0643023	0.739229	ITGB1BP2
ENSG00000134308.14	8101.52	0.24137	0.130622	1.84785	0.0646235	0.739402	YWHAQ
ENSG00000164597.15	2254.33	0.312406	0.169042	1.8481	0.0645883	0.739402	COG5
ENSG00000104154.7	246.848	-0.340784	0.184416	-1.84791	0.0646152	0.739402	SLC30A4
ENSG00000145911.6	102.402	0.533506	0.28871	1.8479	0.0646174	0.739402	N4BP3
ENSG00000104856.14	384.462	-0.269386	0.145852	-1.84698	0.0647498	0.739402	RELB
ENSG00000226421.1	11.3248	-1.05018	0.568485	-1.84733	0.0646992	0.739402	SLC25A5P5
ENSG00000261222.3	13.4276	-1.15111	0.622638	-1.84876	0.0644925	0.739402	AC064805.1
ENSG00000167968.13	15.784	0.511477	0.276946	1.84685	0.0647691	0.739402	DNASE1L2
ENSG00000154655.16	95.4781	-0.957568	0.517826	-1.84921	0.0644277	0.739402	L3MBTL4
ENSG00000104643.10	306.194	-0.287437	0.155487	-1.84862	0.064513	0.739402	MTMR9
ENSG00000138119.17	3262.74	0.503346	0.272351	1.84815	0.06458	0.739402	MYOF
ENSG00000257017.9	18.7984	-1.13369	0.613864	-1.84681	0.0647743	0.739402	HP
ENSG00000238133.6	21.628	0.627517	0.339882	1.84628	0.064852	0.739854	MAP3K20-AS1
ENSG00000111642.16	275.19	0.280097	0.151733	1.84598	0.0648951	0.739911	CHD4
ENSG00000204175.5	128.324	0.684048	0.371744	1.8401	0.0657531	0.741573	GPRIN2
ENSG00000256262.1	13.5194	-0.776717	0.422169	-1.83982	0.0657942	0.741573	USP30-AS1
ENSG00000011566.15	1315.66	0.266413	0.144734	1.8407	0.0656653	0.741573	MAP4K3
ENSG00000136149.6	510.181	0.579232	0.314096	1.84413	0.0651648	0.741573	RPL13AP25
ENSG00000110934.13	349.81	-0.398327	0.215933	-1.84468	0.0650847	0.741573	BIN2
ENSG00000218350.1	14.401	0.737253	0.400561	1.84055	0.0656874	0.741573	LYPLA1P3
ENSG00000177640.16	102.109	0.388571	0.211221	1.83964	0.0658217	0.741573	CASC2
ENSG00000172164.15	1248.58	0.577796	0.313532	1.84286	0.0653488	0.741573	SNTB1
ENSG00000100292.18	612.252	-0.388222	0.210673	-1.84277	0.0653627	0.741573	HMOX1
ENSG00000107551.21	867.504	-0.488794	0.2656	-1.84034	0.0657181	0.741573	RASSF4
ENSG00000187116.14	79.9056	-0.602021	0.326668	-1.84291	0.0653419	0.741573	LILRA5
ENSG00000243364.8	436.236	0.391129	0.212607	1.83968	0.0658158	0.741573	EFNA4
ENSG00000185112.6	217.788	0.50197	0.272291	1.84351	0.0652552	0.741573	FAM43A
ENSG00000188917.15	675.725	-0.314684	0.171143	-1.83871	0.0659575	0.741573	TRMT2B
ENSG00000119431.9	1289.03	0.323075	0.175704	1.83875	0.0659525	0.741573	HDHD3
ENSG00000162878.13	1129.33	0.518761	0.281917	1.84012	0.065751	0.741573	PKDCC
ENSG00000140519.14	28.7384	-1.24218	0.674244	-1.84233	0.0654266	0.741573	RHCG
ENSG00000244073.1	31.0725	0.616867	0.335285	1.83983	0.0657934	0.741573	RPS4XP6
ENSG00000196228.3	27.292	-1.58664	0.86276	-1.83903	0.0659104	0.741573	SULT1C3
ENSG00000125430.9	96.8835	-0.449906	0.244418	-1.84072	0.0656621	0.741573	HS3ST3B1
ENSG00000196260.5	67.4758	1.42439	0.774524	1.83905	0.0659071	0.741573	SFTA2
ENSG00000169583.13	56.5803	0.725609	0.39413	1.84104	0.0656158	0.741573	CLIC3
ENSG00000084444.14	79.8703	0.576194	0.312988	1.84095	0.0656293	0.741573	FAM234B
ENSG00000176087.15	1150.62	-0.342348	0.185666	-1.8439	0.0651983	0.741573	SLC35A4
ENSG00000255182.2	17.0902	0.699764	0.380858	1.83734	0.0661603	0.742134	AC084125.2
ENSG00000177542.11	359.811	-0.469364	0.255423	-1.83759	0.0661222	0.742134	SLC25A22
ENSG00000239719.1	14.7245	0.706105	0.384276	1.83749	0.0661371	0.742134	AC004890.1
ENSG00000185686.18	26.9341	1.54667	0.841559	1.83786	0.0660826	0.742134	PRAME
ENSG00000135018.14	4133.6	0.202595	0.110304	1.83669	0.0662554	0.742772	UBQLN1
ENSG00000225680.1	44.0384	0.898478	0.489401	1.83587	0.0663767	0.743702	AL163953.1
ENSG00000132549.18	1560.32	0.366908	0.199883	1.83561	0.0664149	0.743702	VPS13B
ENSG00000093183.14	731.603	-0.288009	0.156955	-1.83498	0.0665083	0.743769	SEC22C
ENSG00000186007.10	79.6499	0.970825	0.529193	1.83454	0.0665742	0.743769	LEMD1
ENSG00000163823.4	539.143	-0.551819	0.300787	-1.83458	0.0665675	0.743769	CCR1
ENSG00000165046.13	58.1425	0.565222	0.308071	1.83471	0.0665481	0.743769	LETM2
ENSG00000173193.15	4273.38	-0.495725	0.270519	-1.8325	0.0668773	0.743812	PARP14
ENSG00000250376.1	29.4486	1.29934	0.708701	1.83341	0.066742	0.743812	AC093720.1
ENSG00000281357.3	21.235	-0.504232	0.275178	-1.83239	0.0668937	0.743812	ARRDC3-AS1
ENSG00000022567.10	521.585	0.376493	0.205392	1.83304	0.0667966	0.743812	SLC45A4
ENSG00000073910.22	479.73	-0.529682	0.289219	-1.83142	0.0670377	0.743812	FRY
ENSG00000131558.15	2163.38	0.295024	0.160914	1.83343	0.066739	0.743812	EXOC4
ENSG00000101004.15	177.009	-0.85939	0.468741	-1.8334	0.0667429	0.743812	NINL
ENSG00000258837.1	106.865	1.08669	0.592971	1.83262	0.0668598	0.743812	AL133370.1
ENSG00000115919.15	264.797	-0.62769	0.342207	-1.83424	0.0666179	0.743812	KYNU
ENSG00000237126.8	20.2355	-0.514547	0.280916	-1.83167	0.0670003	0.743812	AC073254.1
ENSG00000125347.14	1220.62	-0.533628	0.291284	-1.83199	0.0669536	0.743812	IRF1
ENSG00000172888.12	1083.05	-0.320968	0.175243	-1.83156	0.067017	0.743812	ZNF621
ENSG00000224839.1	11.9697	0.796622	0.436383	1.82551	0.0679239	0.744803	RPL12P17
ENSG00000026950.17	1531.09	-0.49318	0.269535	-1.82974	0.0672886	0.744803	BTN3A1
ENSG00000181450.18	511.489	0.26633	0.145905	1.82537	0.0679458	0.744803	ZNF678
ENSG00000249306.6	28.381	-1.3283	0.727621	-1.82554	0.0679188	0.744803	LINC01411
ENSG00000121022.14	1679.25	0.342692	0.187696	1.82578	0.0678835	0.744803	COPS5
ENSG00000230629.2	220.557	0.599981	0.32778	1.83044	0.0671844	0.744803	RPS23P8
ENSG00000180694.14	762.845	0.620062	0.339744	1.82509	0.067988	0.744803	TMEM64
ENSG00000226284.1	17.2978	0.486218	0.266167	1.82674	0.0677391	0.744803	ARPC3P1
ENSG00000125952.20	1088.08	0.242003	0.13259	1.8252	0.0679715	0.744803	MAX
ENSG00000198796.7	68.7261	-0.684176	0.375111	-1.82393	0.0681627	0.744803	ALPK2
ENSG00000180667.10	968.222	0.437826	0.239725	1.82637	0.0677952	0.744803	YOD1
ENSG00000279806.1	51.2267	-0.98839	0.541048	-1.82681	0.0677289	0.744803	AC018629.1
ENSG00000160949.17	490.151	0.521914	0.285367	1.82892	0.0674112	0.744803	TONSL
ENSG00000268471.6	184.141	-0.390606	0.21384	-1.82662	0.0677567	0.744803	MIR4453HG
ENSG00000169189.17	1327.47	0.310803	0.169877	1.82958	0.0673127	0.744803	NSMCE1
ENSG00000162552.15	140.352	0.774694	0.424603	1.82451	0.0680746	0.744803	WNT4
ENSG00000175874.10	35.7957	1.25925	0.690026	1.82493	0.068012	0.744803	CREG2
ENSG00000081052.13	69.1052	0.820811	0.449975	1.82413	0.0681331	0.744803	COL4A4
ENSG00000197536.11	193.17	-0.493155	0.269889	-1.82725	0.067662	0.744803	IRF1-AS1
ENSG00000115468.12	38.1547	0.693934	0.380435	1.82406	0.0681437	0.744803	EFHD1
ENSG00000183828.15	355.219	0.405117	0.221768	1.82676	0.0677366	0.744803	NUDT14
ENSG00000224982.4	14.7897	-0.681364	0.372972	-1.82685	0.0677222	0.744803	TMEM233
ENSG00000107560.12	619.572	0.319716	0.175265	1.82419	0.068124	0.744803	RAB11FIP2
ENSG00000100316.16	74591.9	0.364942	0.199666	1.82777	0.0675848	0.744803	RPL3
ENSG00000096746.17	3210.68	0.212635	0.116332	1.82784	0.067574	0.744803	HNRNPH3
ENSG00000198719.9	205.853	0.590058	0.322395	1.83023	0.0672151	0.744803	DLL1
ENSG00000120992.18	3407.44	0.410232	0.224538	1.82701	0.067699	0.744803	LYPLA1
ENSG00000054179.12	225.835	0.594525	0.32602	1.82358	0.068215	0.744955	ENTPD2
ENSG00000184719.12	203.818	0.71715	0.39332	1.82333	0.0682541	0.744964	RNLS
ENSG00000118094.12	29.7087	-0.806663	0.442793	-1.82176	0.0684911	0.745873	TREH
ENSG00000089012.14	67.5472	-0.637917	0.350093	-1.82214	0.0684342	0.745873	SIRPG
ENSG00000174840.9	945.007	-0.241844	0.132709	-1.82236	0.0683997	0.745873	PDE12
ENSG00000105699.16	2979.79	0.353495	0.194039	1.82178	0.0684888	0.745873	LSR
ENSG00000109046.15	3154.77	-0.351603	0.193033	-1.82146	0.0685362	0.745946	WSB1
ENSG00000150594.7	136.772	0.922876	0.507172	1.81965	0.0688122	0.74644	ADRA2A
ENSG00000172809.13	9790.42	0.303764	0.166841	1.82069	0.0686546	0.74644	RPL38
ENSG00000100836.10	363.42	0.309605	0.170144	1.81967	0.06881	0.74644	PABPN1
ENSG00000125633.11	1410.85	-0.30487	0.167503	-1.82009	0.0687453	0.74644	CCDC93
ENSG00000232940.6	17.3598	-0.509442	0.279962	-1.81968	0.0688074	0.74644	HCG25
ENSG00000126602.11	1864.46	0.237573	0.130536	1.81999	0.0687606	0.74644	TRAP1
ENSG00000264522.6	659.79	0.268734	0.147705	1.8194	0.0688511	0.746444	OTUD7B
ENSG00000171160.18	127.41	0.394721	0.216996	1.81903	0.0689076	0.74664	MORN4
ENSG00000184792.16	171.889	0.470159	0.258519	1.81866	0.0689628	0.746821	OSBP2
ENSG00000273145.1	24.5735	0.56244	0.309348	1.81815	0.0690415	0.747257	BX537318.1
ENSG00000145685.14	1452.5	-0.312936	0.17219	-1.81738	0.0691582	0.748103	LHFPL2
ENSG00000197291.9	24.2146	0.759994	0.418356	1.81662	0.0692751	0.74895	RAMP2-AS1
ENSG00000105404.11	193.823	0.436925	0.240625	1.8158	0.0694016	0.749901	RABAC1
ENSG00000159871.15	106.139	-0.67243	0.370491	-1.81497	0.0695287	0.750439	LYPD5
ENSG00000003400.15	970.665	-0.305926	0.168551	-1.81503	0.0695185	0.750439	CASP10
ENSG00000170442.12	13.5617	0.80592	0.444495	1.81311	0.0698144	0.751746	KRT86
ENSG00000204584.1	14.2113	0.734653	0.406239	1.80843	0.0705403	0.751746	AC027801.1
ENSG00000153930.12	12.9608	-1.21827	0.673618	-1.80855	0.0705209	0.751746	ANKFN1
ENSG00000117868.17	4556.36	0.231983	0.128174	1.80991	0.0703103	0.751746	ESYT2
ENSG00000121807.6	178.382	-0.698959	0.386283	-1.80945	0.0703814	0.751746	CCR2
ENSG00000197535.15	621.951	-0.472238	0.260617	-1.812	0.0699867	0.751746	MYO5A
ENSG00000122729.19	1580.05	-0.316481	0.175002	-1.80844	0.0705374	0.751746	ACO1
ENSG00000120337.8	20.825	-0.723322	0.399829	-1.80908	0.0704391	0.751746	TNFSF18
ENSG00000181007.9	72.2997	-0.58334	0.322521	-1.80869	0.0704997	0.751746	ZFP82
ENSG00000132639.13	20.176	0.900523	0.497863	1.80878	0.0704858	0.751746	SNAP25
ENSG00000267102.1	18.5979	-0.538259	0.297386	-1.80997	0.0703009	0.751746	AC060766.1
ENSG00000167695.15	649.885	-0.451612	0.249451	-1.81042	0.0702305	0.751746	TLCD3A
ENSG00000145864.14	86.8868	-1.48098	0.818629	-1.8091	0.0704358	0.751746	GABRB2
ENSG00000233762.3	198.254	0.554708	0.306618	1.80912	0.070433	0.751746	RPS15P4
ENSG00000260276.2	34.2059	-0.450399	0.249037	-1.80856	0.070519	0.751746	AC022167.2
ENSG00000176700.20	34.8799	-0.44101	0.243793	-1.80895	0.0704588	0.751746	SCAND2P
ENSG00000185728.17	2461.48	0.225626	0.124537	1.81172	0.07003	0.751746	YTHDF3
ENSG00000259668.6	38.7173	-0.520174	0.287575	-1.80883	0.0704777	0.751746	AC066613.1
ENSG00000164400.6	15.8889	-0.979723	0.541592	-1.80897	0.070456	0.751746	CSF2
ENSG00000104884.16	419.991	0.282638	0.156036	1.81137	0.0700842	0.751746	ERCC2
ENSG00000135390.21	5008.91	0.362761	0.200324	1.81087	0.0701614	0.751746	ATP5MC2
ENSG00000260807.7	81.3706	1.17105	0.647429	1.80878	0.0704858	0.751746	CEROX1
ENSG00000171316.12	1310.16	0.529722	0.292759	1.80942	0.0703863	0.751746	CHD7
ENSG00000231584.8	50.6999	0.378963	0.209631	1.80776	0.0706441	0.752176	FAHD2CP
ENSG00000115604.11	165.787	-0.435163	0.240731	-1.80767	0.0706581	0.752176	IL18R1
ENSG00000227619.3	82.047	0.961081	0.531932	1.80677	0.0707975	0.752741	AL391056.1
ENSG00000145022.4	662.705	-0.319815	0.177052	-1.80633	0.0708663	0.752741	TCTA
ENSG00000168621.15	16.5701	0.729069	0.403542	1.80668	0.0708126	0.752741	GDNF
ENSG00000099282.10	2310.4	0.382959	0.211986	1.80653	0.0708359	0.752741	TSPAN15
ENSG00000163220.11	1626.33	0.815719	0.451793	1.80551	0.0709943	0.753689	S100A9
ENSG00000156471.13	3021.4	0.302245	0.167588	1.8035	0.0713099	0.753799	PTDSS1
ENSG00000203780.12	83.7424	0.407105	0.225642	1.80421	0.0711986	0.753799	FANK1
ENSG00000235997.3	11.8902	-0.674238	0.373704	-1.8042	0.0711999	0.753799	LINC01936
ENSG00000111490.15	81.0534	-0.391879	0.217286	-1.80352	0.0713065	0.753799	TBC1D30
ENSG00000237668.1	24.7716	0.606557	0.336329	1.80346	0.0713153	0.753799	RPS15AP38
ENSG00000005206.17	1092.04	0.624403	0.346095	1.80414	0.0712099	0.753799	SPPL2B
ENSG00000186312.10	104.94	-0.390771	0.216619	-1.80395	0.0712385	0.753799	CA5BP1
ENSG00000142186.17	1267.24	-0.208985	0.115782	-1.80499	0.0710763	0.753799	SCYL1
ENSG00000255857.6	44.1723	0.317271	0.176158	1.80106	0.0716937	0.756672	PXN-AS1
ENSG00000131097.7	12.1656	-0.56232	0.312201	-1.80115	0.0716797	0.756672	HIGD1B
ENSG00000132300.19	3119.08	0.201985	0.112167	1.80075	0.0717429	0.756672	PTCD3
ENSG00000277200.1	12.9984	1.12146	0.622693	1.80099	0.0717043	0.756672	AC005696.4
ENSG00000169083.18	54.602	-0.822088	0.457169	-1.79821	0.0721431	0.756794	AR
ENSG00000135480.16	90.3691	0.620745	0.345098	1.79875	0.0720584	0.756794	KRT7
ENSG00000272989.1	12.8981	-0.867871	0.482202	-1.79981	0.071891	0.756794	LINC02012
ENSG00000164754.15	7595.61	0.334947	0.186207	1.79878	0.0720528	0.756794	RAD21
ENSG00000189195.15	317.916	0.28473	0.158307	1.7986	0.0720826	0.756794	BTBD8
ENSG00000164919.11	3551.82	0.412368	0.229073	1.80016	0.0718354	0.756794	COX6C
ENSG00000226383.7	81.4338	0.967437	0.537762	1.79901	0.0720177	0.756794	LINC01876
ENSG00000135604.10	130.663	-0.586412	0.325776	-1.80005	0.0718531	0.756794	STX11
ENSG00000164344.16	16.9994	-0.751195	0.417747	-1.79821	0.0721443	0.756794	KLKB1
ENSG00000197249.14	8456.85	-0.958725	0.53306	-1.79853	0.0720928	0.756794	SERPINA1
ENSG00000198242.14	5783.81	0.371556	0.206795	1.79674	0.0723769	0.758415	RPL23A
ENSG00000164934.14	2765.96	0.363604	0.202361	1.79681	0.0723665	0.758415	DCAF13
ENSG00000168646.13	2504.56	0.844494	0.470459	1.79504	0.0726467	0.759782	AXIN2
ENSG00000224892.6	30.0717	0.546415	0.304462	1.79469	0.0727031	0.759782	RPS4XP16
ENSG00000071127.17	7041.7	-0.227794	0.126918	-1.79482	0.0726825	0.759782	WDR1
ENSG00000142632.17	235.187	0.467291	0.260353	1.79483	0.0726801	0.759782	ARHGEF19
ENSG00000231747.1	53.4705	0.739394	0.41186	1.79525	0.0726133	0.759782	AC079922.1
ENSG00000057252.13	1065.99	-0.425531	0.237235	-1.79371	0.0728595	0.761008	SOAT1
ENSG00000197457.10	627.349	0.706722	0.394061	1.79343	0.0729037	0.761059	STMN3
ENSG00000133246.12	29.6519	-0.679073	0.378726	-1.79305	0.0729655	0.761296	PRAM1
ENSG00000108523.16	1597.66	0.22482	0.125466	1.79188	0.0731521	0.761765	RNF167
ENSG00000242534.2	23.8254	-1.16128	0.648079	-1.79188	0.0731529	0.761765	IGKV2D-28
ENSG00000133561.15	546.991	-0.454808	0.253761	-1.79227	0.0730898	0.761765	GIMAP6
ENSG00000224032.7	462.334	0.424422	0.236871	1.79178	0.0731674	0.761765	EPB41L4A-AS1
ENSG00000234268.1	23.7017	0.481326	0.268682	1.79143	0.0732236	0.761942	AP000936.3
ENSG00000120963.12	2319.73	0.261121	0.145823	1.79066	0.0733475	0.762822	ZNF706
ENSG00000054983.17	923.593	0.648348	0.362125	1.7904	0.0733901	0.762856	GALC
ENSG00000167419.11	3.76757	-1.51026	0.843653	-1.79015	0.07343	0.762862	LPO
ENSG00000131724.11	4607.73	-0.404978	0.226395	-1.78881	0.0736454	0.763486	IL13RA1
ENSG00000163216.7	19.6975	2.44168	1.36476	1.78909	0.0736009	0.763486	SPRR2D
ENSG00000257800.1	50.5502	0.612769	0.342647	1.78834	0.073721	0.763486	FNBP1P1
ENSG00000128512.23	343.789	-0.449421	0.25114	-1.78953	0.0735301	0.763486	DOCK4
ENSG00000257790.1	11.8169	0.654365	0.365962	1.78807	0.0737653	0.763486	EIF4A1P4
ENSG00000238121.6	56.6996	-0.575071	0.321556	-1.7884	0.0737116	0.763486	LINC00426
ENSG00000178127.13	29.3015	-0.749201	0.418964	-1.78822	0.0737404	0.763486	NDUFV2
ENSG00000249395.4	272.636	0.806613	0.451206	1.78768	0.0738271	0.763719	CASC9
ENSG00000157827.20	1314.11	-0.288889	0.161636	-1.78728	0.0738922	0.763985	FMNL2
ENSG00000124508.17	411.467	-0.39848	0.223276	-1.78469	0.0743108	0.764412	BTN2A2
ENSG00000228889.7	36.828	-0.527474	0.295402	-1.78561	0.0741621	0.764412	UBAC2-AS1
ENSG00000268879.1	6.06442	1.55123	0.869446	1.78416	0.0743974	0.764412	IGFL1P1
ENSG00000166523.8	129.881	-0.771261	0.432295	-1.78411	0.0744059	0.764412	CLEC4E
ENSG00000198744.5	1430.34	0.509086	0.285189	1.78508	0.0742477	0.764412	MTCO3P12
ENSG00000227008.2	143.919	0.553273	0.309808	1.78586	0.0741218	0.764412	AL009174.1
ENSG00000114395.11	358.97	-0.393799	0.220441	-1.78641	0.0740326	0.764412	CYB561D2
ENSG00000237886.1	16.7281	0.618709	0.346588	1.78514	0.0742382	0.764412	NALT1
ENSG00000134780.10	281.466	-0.670325	0.375655	-1.78442	0.074356	0.764412	DAGLA
ENSG00000070540.13	819.253	-0.455719	0.255216	-1.78562	0.0741606	0.764412	WIPI1
ENSG00000132470.14	3387.07	0.488398	0.273522	1.78559	0.0741659	0.764412	ITGB4
ENSG00000249774.1	10.7547	0.681223	0.381631	1.78503	0.0742566	0.764412	AC025458.1
ENSG00000188404.10	423.635	-0.655415	0.367528	-1.78331	0.0745364	0.765238	SELL
ENSG00000176842.15	25.6708	1.02562	0.575287	1.7828	0.0746184	0.765238	IRX5
ENSG00000177679.16	30.2222	0.567818	0.318525	1.78265	0.0746439	0.765238	SRRM3
ENSG00000186074.19	133.159	-0.579661	0.325088	-1.78309	0.0745719	0.765238	CD300LF
ENSG00000155926.14	629.978	-0.543301	0.304918	-1.78179	0.074783	0.766259	SLA
ENSG00000130822.16	31.9075	0.994762	0.55906	1.77935	0.075183	0.767106	PNCK
ENSG00000105383.15	91.7101	-0.505225	0.28394	-1.77933	0.0751849	0.767106	CD33
ENSG00000173120.15	1714.71	-0.403474	0.226645	-1.7802	0.075043	0.767106	KDM2A
ENSG00000150455.13	142.9	-0.283164	0.159329	-1.77723	0.0755305	0.767106	TIRAP
ENSG00000229344.1	481.292	0.614641	0.34582	1.77735	0.0755114	0.767106	MTCO2P12
ENSG00000196188.12	2336.21	1.69087	0.94954	1.78072	0.0749576	0.767106	CTSE
ENSG00000084693.16	712.242	0.296197	0.166662	1.77723	0.0755309	0.767106	AGBL5
ENSG00000177946.6	181.838	0.310367	0.174475	1.77887	0.0752618	0.767106	CENPBD1
ENSG00000211670.2	258.058	-1.39092	0.781638	-1.77949	0.075159	0.767106	IGLV3-9
ENSG00000083845.9	21637	0.378964	0.213161	1.77782	0.0754326	0.767106	RPS5
ENSG00000059588.10	2163.2	0.354271	0.199355	1.77708	0.0755543	0.767106	TARBP1
ENSG00000128487.17	745.759	-0.390001	0.219168	-1.77946	0.0751643	0.767106	SPECC1
ENSG00000100302.7	94.0624	0.844943	0.475065	1.77858	0.0753081	0.767106	RASD2
ENSG00000087589.16	80.3107	-0.604658	0.339822	-1.77934	0.0751843	0.767106	CASS4
ENSG00000026508.20	7692.9	-0.37339	0.209717	-1.78045	0.0750023	0.767106	CD44
ENSG00000184925.12	68.6364	0.818347	0.460281	1.77793	0.0754154	0.767106	LCN12
ENSG00000161912.18	108.053	-0.56414	0.317115	-1.77897	0.0752441	0.767106	ADCY10P1
ENSG00000279605.1	12.9843	0.560786	0.31559	1.77695	0.0755768	0.767106	AC067930.5
ENSG00000128656.15	356.633	-0.41731	0.235058	-1.77535	0.0758401	0.769377	CHN1
ENSG00000170417.16	198.229	0.385338	0.217145	1.77456	0.0759699	0.770291	TMEM182
ENSG00000279026.1	12.3725	-0.622347	0.350845	-1.77385	0.0760876	0.771082	AC005225.4
ENSG00000184293.7	22.1587	-0.770513	0.434462	-1.77349	0.0761481	0.771292	CLECL1
ENSG00000117691.10	1188	0.317395	0.179177	1.7714	0.0764945	0.774202	NENF
ENSG00000206172.8	16.7782	-1.18751	0.670427	-1.77127	0.0765151	0.774202	HBA1
ENSG00000172000.7	26.0297	-2.29412	1.29561	-1.77068	0.0766141	0.774494	ZNF556
ENSG00000134489.7	13.943	-0.830575	0.469087	-1.77062	0.0766237	0.774494	HRH4
ENSG00000116668.13	251.3	0.226723	0.128073	1.77025	0.0766847	0.774707	SWT1
ENSG00000163961.4	583.735	-0.262326	0.148262	-1.76934	0.076837	0.775584	RNF168
ENSG00000196951.11	19.6957	-0.549553	0.310613	-1.76925	0.0768514	0.775584	SCOC-AS1
ENSG00000115756.13	934.765	0.413193	0.233601	1.7688	0.0769269	0.775943	HPCAL1
ENSG00000105258.9	57.6459	0.307833	0.174095	1.76819	0.0770298	0.776577	POLR2I
ENSG00000234585.6	127.422	0.313357	0.177331	1.76707	0.0772167	0.778058	CCT6P3
ENSG00000120800.5	1252.47	-0.370058	0.209491	-1.76647	0.0773174	0.778265	UTP20
ENSG00000204866.8	155.516	1.45238	0.822172	1.76651	0.0773099	0.778265	IGFL2
ENSG00000286681.1	28.1121	0.655879	0.371488	1.76555	0.077472	0.77928	AF235103.3
ENSG00000073861.3	20.2419	-0.765208	0.433495	-1.7652	0.0775293	0.77928	TBX21
ENSG00000197363.9	197.917	0.424308	0.240381	1.76515	0.0775387	0.77928	ZNF517
ENSG00000176244.7	118.778	0.598646	0.339476	1.76344	0.0778259	0.779622	ACBD7
ENSG00000166068.13	1494.83	-0.348939	0.197892	-1.76328	0.0778538	0.779622	SPRED1
ENSG00000153294.12	327.913	0.960085	0.544193	1.76424	0.0776919	0.779622	ADGRF4
ENSG00000169918.10	44.5146	0.662073	0.375287	1.76418	0.0777016	0.779622	OTUD7A
ENSG00000109670.16	625.618	-0.23061	0.130763	-1.76357	0.0778043	0.779622	FBXW7
ENSG00000186591.13	2474.84	0.23492	0.133179	1.76394	0.0777428	0.779622	UBE2H
ENSG00000226445.2	25.103	-0.619858	0.351488	-1.76353	0.077812	0.779622	BX322234.1
ENSG00000156239.12	458.871	0.299549	0.170586	1.756	0.0790882	0.779702	N6AMT1
ENSG00000026652.15	231.532	-0.515256	0.29237	-1.76234	0.078012	0.779702	AGPAT4
ENSG00000120328.6	26.3691	-0.616524	0.350823	-1.75736	0.0788557	0.779702	PCDHB12
ENSG00000287222.1	72.6517	0.490527	0.279106	1.7575	0.0788334	0.779702	AC234917.3
ENSG00000226824.7	57.6133	0.578437	0.328587	1.76038	0.0783434	0.779702	AC006001.2
ENSG00000166902.5	1187.98	-0.287132	0.163619	-1.75488	0.0792797	0.779702	MRPL16
ENSG00000107147.14	10.1794	1.12381	0.639946	1.7561	0.0790705	0.779702	KCNT1
ENSG00000204387.14	417.472	0.404459	0.230464	1.75498	0.0792634	0.779702	SNHG32
ENSG00000130701.4	275.455	0.569737	0.324019	1.75835	0.0786887	0.779702	RBBP8NL
ENSG00000197275.14	109.607	0.502325	0.285628	1.75867	0.0786337	0.779702	RAD54B
ENSG00000136881.12	18.0949	0.856046	0.486053	1.76122	0.0782013	0.779702	BAAT
ENSG00000101265.16	688.311	-0.403074	0.229697	-1.75481	0.0792925	0.779702	RASSF2
ENSG00000169116.11	3589.61	-0.622628	0.354594	-1.75589	0.0791077	0.779702	PARM1
ENSG00000152229.18	377.834	-0.506855	0.287847	-1.76085	0.0782638	0.779702	PSTPIP2
ENSG00000091157.14	305.413	-0.348355	0.198312	-1.7566	0.0789869	0.779702	WDR7
ENSG00000287335.1	9.7688	-0.739195	0.419849	-1.76062	0.0783027	0.779702	AL139351.3
ENSG00000150768.16	1256.55	-0.259308	0.147516	-1.75782	0.0787777	0.779702	DLAT
ENSG00000159409.15	22.7033	-1.09499	0.623994	-1.75481	0.0792923	0.779702	CELF3
ENSG00000174028.6	87.0965	0.449299	0.255725	1.75696	0.0789246	0.779702	FAM3C2P
ENSG00000139793.18	2635.4	0.348301	0.198415	1.75542	0.0791871	0.779702	MBNL2
ENSG00000188549.12	488.798	0.517552	0.293718	1.76207	0.0780569	0.779702	CCDC9B
ENSG00000245958.6	170.847	-0.291383	0.165543	-1.76016	0.0783804	0.779702	AC093752.1
ENSG00000089060.11	623.506	-0.258898	0.147557	-1.75457	0.0793328	0.779702	SLC8B1
ENSG00000165490.13	401.858	-0.421384	0.240136	-1.75477	0.079298	0.779702	DDIAS
ENSG00000198821.11	154.715	-0.556015	0.316396	-1.75734	0.0788603	0.779702	CD247
ENSG00000112576.13	948.661	-0.3458	0.196519	-1.75963	0.0784712	0.779702	CCND3
ENSG00000221867.9	18.6728	4.18772	2.38568	1.75536	0.0791984	0.779702	MAGEA3
ENSG00000267369.1	16.4323	-0.63676	0.362745	-1.75539	0.0791924	0.779702	TAF5LP1
ENSG00000171798.18	15.9548	0.989867	0.564089	1.75481	0.0792926	0.779702	KNDC1
ENSG00000183208.12	40.6569	-0.424991	0.242022	-1.756	0.0790878	0.779702	GDPGP1
ENSG00000186231.17	78.4337	-0.904888	0.515228	-1.75628	0.0790398	0.779702	KLHL32
ENSG00000183813.7	117.501	-0.650869	0.369572	-1.76114	0.0782145	0.779702	CCR4
ENSG00000213981.8	71.9099	1.50176	0.854871	1.75671	0.0789677	0.779702	AC007277.1
ENSG00000144597.14	562.568	-0.275421	0.156825	-1.75622	0.0790502	0.779702	EAF1
ENSG00000279413.1	12.2758	-0.5146	0.293306	-1.75448	0.0793476	0.779702	AC112497.2
ENSG00000147799.11	265.156	0.608225	0.345877	1.7585	0.0786626	0.779702	ARHGAP39
ENSG00000196843.17	511.919	-0.34146	0.194437	-1.75615	0.0790637	0.779702	ARID5A
ENSG00000115170.15	566.848	-0.233915	0.133541	-1.75164	0.0798363	0.780735	ACVR1
ENSG00000231125.2	13.5707	0.440438	0.251472	1.75144	0.0798701	0.780735	AF129075.1
ENSG00000012660.14	1843.73	-0.425992	0.24315	-1.75197	0.079779	0.780735	ELOVL5
ENSG00000237330.3	33.4611	0.591525	0.337532	1.7525	0.0796872	0.780735	RNF223
ENSG00000113194.13	1708.72	-0.185945	0.106119	-1.75223	0.0797335	0.780735	FAF2
ENSG00000105865.11	158.771	0.398942	0.227719	1.7519	0.0797905	0.780735	DUS4L
ENSG00000004059.11	2084.78	0.304006	0.173384	1.75337	0.0795378	0.780735	ARF5
ENSG00000182054.10	4018.81	-0.366775	0.209241	-1.75289	0.0796216	0.780735	IDH2
ENSG00000281103.2	63.268	-0.582804	0.332737	-1.75155	0.0798518	0.780735	TRG-AS1
ENSG00000186474.15	58.8055	1.32263	0.755231	1.7513	0.079895	0.780735	KLK12
ENSG00000105379.10	397.933	0.312415	0.178251	1.75266	0.0796596	0.780735	ETFB
ENSG00000203876.10	84.8937	0.842789	0.481405	1.75069	0.0799998	0.780974	ADD3-AS1
ENSG00000108813.11	11.8405	0.954456	0.545156	1.75079	0.0799814	0.780974	DLX4
ENSG00000262902.1	249.736	0.567169	0.32403	1.75036	0.0800566	0.781135	MTCO1P40
ENSG00000129675.16	622.267	-0.443253	0.25331	-1.74984	0.0801455	0.781169	ARHGEF6
ENSG00000117152.14	192.955	0.793555	0.453554	1.74964	0.0801808	0.781169	RGS4
ENSG00000228217.1	16.9743	0.568554	0.3249	1.74994	0.0801294	0.781169	PNRC2P1
ENSG00000182487.12	32.5723	-0.6446	0.368523	-1.74914	0.0802663	0.781299	NCF1B
ENSG00000136490.9	301.682	-0.439033	0.251006	-1.74909	0.0802746	0.781299	LIMD2
ENSG00000169715.15	790.008	0.856494	0.489755	1.74882	0.0803218	0.781367	MT1E
ENSG00000127948.16	1551.1	0.368572	0.210842	1.7481	0.0804472	0.781804	POR
ENSG00000103202.13	1357.65	0.297772	0.170335	1.74816	0.0804368	0.781804	NME4
ENSG00000117154.12	25.9649	-0.620465	0.355216	-1.74672	0.0806855	0.782484	IGSF21
[truncated: 17,418 more rows]

## Sheet: MOFA
Gene	Factor_weight	Entrez_id
PRNCR1	-1.16424	101867536
CCAT1	-1.15581	100507056
CASC8	-1.13333	727677
CCAT2	-1.13333	101805488
PHF20L1	-1.1329	51105
SLA	-1.1329	6503
TG	-1.1329	7038
MYC	-1.1161	4609
SAMD12-AS1	-1.10934	552860
TNFRSF11B	-1.10934	4982
CYC1	-1.09846	1537
EXOSC4	-1.09846	54512
GPAA1	-1.09846	8733
MAF 1.00	-1.09846	84232
MIR6847	-1.09846	102465510
SHARPIN	-1.09846	81858
ZFAT	-1.09807	57623
ZFAT-AS1	-1.09807	594840
PCAT1	-1.09401	100750225
BOP 1.00	-1.09384	23246
DGAT1	-1.09384	8694
HSF1	-1.09384	3297
MIR6848	-1.09384	102465511
MROH1	-1.09384	727957
SCRT1	-1.09384	83482
ZNF623	-1.08734	9831
CCDC166	-1.08586	100130274
FAM83H	-1.08586	286077
MAPK15	-1.08586	225689
MIR4664	-1.08586	100616318
ZNF707	-1.08586	286075
MIR661	-1.0827	724031
MIR6845	-1.0827	102466748
MIR937	-1.0827	100126338
NRBP2	-1.0827	340371
PUF60	-1.0827	22827
SCRIB	-1.0827	23513
MIR7848	-1.07266	102466865
NDRG1	-1.07266	10397
TIGD5	-1.06706	84948
GRINA	-1.06106	2907
MIR6846	-1.06106	102465509
OPLAH	-1.06106	26873
PARP10	-1.06106	84875
SPATC1	-1.06106	375686
LINC00861	-1.059	100130231
AGO2	-1.05371	27161
C8orf33	-1.05238	65265
TMED10P1	-1.05238	286102
ZNF252P	-1.05238	286101
ZNF252P-AS1	-1.05238	286103
EEF1D	-1.05176	1936
GSDMD	-1.05176	79792
MAFA	-1.05176	389692
MROH6	-1.05176	642475
RHPN1	-1.05176	114822
RHPN1-AS1	-1.05176	78998
ZC3H3	-1.05176	23144
MIR6850	-1.05168	102465978
RPL8	-1.05168	6132
ZNF251	-1.05168	90987
ZNF34	-1.05168	80778
ZNF517	-1.05168	340385
FAM135B	-1.05119	51059
ZNF250	-1.04954	58500
KCNK9	-1.04856	51305
TRAPPC9	-1.04856	83696
CYP11B1	-1.0473	1584
GML	-1.0473	2765
JRK	-1.0473	8629
LY6D	-1.0473	8581
LY6K	-1.0473	54742
LYNX1	-1.0473	66004
LYPD2	-1.0473	137797
PSCA	-1.0473	8000
SLURP1	-1.0473	57152
THEM6	-1.0473	51337
CYP11B2	-1.04355	1585
ADCK5	-1.04176	203054
ARHGAP39	-1.04176	80728
C8orf82	-1.04176	414919
CPSF1	-1.04176	29894
FBXL6	-1.04176	26233
FOXH1	-1.04176	8928
GPT	-1.04176	2875
KIFC2	-1.04176	90990
LRRC14	-1.04176	9684
LRRC24	-1.04176	441381
MFSD3	-1.04176	113655
MIR1234	-1.04176	100302196
MIR6849	-1.04176	102466749
MIR6893	-1.04176	102466271
MIR939	-1.04176	100126351
PPP1R16A	-1.04176	84988
RECQL4	-1.04176	9401
SLC52A2	-1.04176	79581
TMEM249	-1.04176	340393
TONSL	-1.04176	4796
VPS28	-1.04176	51160
TRIB1	-1.03965	10221
EFR3A	-1.03945	23167
HHLA1	-1.03945	10086
HPYR1	-1.03945	93668
KCNQ3	-1.03945	3786
OC90	-1.03945	729330
TMEM71	-1.03945	137835
DENND3	-1.03796	22898
SLC45A4	-1.03796	57210
ST3GAL1	-1.03504	6482
CHRAC1	-1.03482	54108
ADCY8	-1.03176	114
GLI4	-1.03139	2738
GSDMC	-1.02945	56169
ANXA13	-1.02879	312
FAM91A1	-1.02879	157769
KLHL38	-1.02879	340359
FER1L6	-1.02871	654463
ZFP41	-1.02576	286128
LINC00977	-1.02494	728724
ZNF16	-1.02318	7564
ARC	-1.02254	23237
TOP1MT	-1.02202	116447
ZNF696	-1.02202	79943
LINC00051	-1.02133	619434
TSNARE1	-1.02133	203062
PTK2	-1.02003	5747
CDC42P3	-1.01913	100128627
GPIHBP1	-1.01913	338328
LY6H	-1.01913	4062
MIR4472-1	-1.01837	100616268
SAMD12	-1.01823	401474
GPR20	-1.01599	2843
MIR1204	-1.014	100302185
MAL2	-1.01054	114569
COLEC10	-1.00957	10584
KHDRBS3	-1.00934	10656
MIR30B	-1.00934	407030
MIR30D	-1.00934	407033
ASAP1	-1.00593	50807
ASAP1-IT1	-1.00593	29065
ASAP1-IT2	-1.00593	100507117
MIR5194	-1.00593	100847051
COL14A1	-0.999599	7373
FER1L6-AS1	-0.993394	439941
FER1L6-AS2	-0.993394	157376
LINC00964	-0.993394	157381
MIR6844	-0.993394	102466200
MTSS1	-0.993394	9788
NDUFB9	-0.993394	4715
NSMCE2	-0.993394	286053
RNF139	-0.993394	11236
SQLE	-0.993394	6713
TATDN1	-0.993394	83940
TMEM65	-0.993394	157378
TRMT12	-0.993394	55039
ZNF572	-0.993394	137209
MIR1205	-0.99218	100302161
MIR1206	-0.99218	100302170
MIR1207	-0.99218	100302175
STK3	-0.991928	6788
MROH5	-0.986764	389690
PTP4A3	-0.986764	11156
KCNS2	-0.985695	3788
COMMD5	-0.983748	28991
ZNF7	-0.983748	7553
FSBP	-0.983391	100861412
FBXO32	-0.983167	114907
NIPAL2	-0.97999	79815
RAD54B	-0.978672	25788
TPD52	-0.972114	7163
MIR1208	-0.972027	100302281
PVT1	-0.972027	5820
TBC1D31	-0.96641	93594
MTBP	-0.964543	27085
SNTB1	-0.961551	6641
MRPL13	-0.959775	28998
ESRP1	-0.955	54845
ENPP2	-0.95276	5168
FLJ42969	-0.952368	441374
ZNF706	-0.952368	51123
DERL1	-0.949774	79139
ZHX2	-0.949774	22882
DPY19L4	-0.948233	286148
MIR5680	-0.948095	100847001
RRM2B	-0.948095	50484
CCNE2	-0.945616	9134
INTS8	-0.945616	55656
EXT1	-0.944141	2131
IL7	-0.942907	3574
SLC30A8	-0.94078	169026
MRPS28	-0.933717	28957
HAS2	-0.93075	3037
HAS2-AS1	-0.93075	594842
RBM12B	-0.929111	389677
RBM12B-AS1	-0.929111	55472
TMEM67	-0.929111	91147
LINC00536	-0.928763	100859921
NDUFAF6	-0.928613	137682
AARD	-0.927367	441376
EIF3H	-0.927367	8667
MIR3610	-0.927367	100500914
RAD21	-0.927367	5885
RAD21-AS1	-0.927367	644660
UTP23	-0.927367	84294
CDH17	-0.925281	1015
GEM	-0.925281	2669
MIR378D2	-0.925281	100616169
PDP1	-0.925281	54704
MIR8084	-0.924155	102467005
TRIQK	-0.924155	286144
ATAD2	-0.922847	29028
C8orf76	-0.922847	84933
FAM83A	-0.922847	84985
FAM83A-AS1	-0.922847	100131726
MIR4663	-0.922847	100616260
ZHX1	-0.922847	11244
ABRA	-0.9153	137735
ANGPT1	-0.9153	284
DCSTAMP	-0.9153	81501
DPYS	-0.9153	1807
LRP12	-0.9153	29967
OXR1	-0.9153	55074
ZFPM2	-0.9153	23414
EBAG9	-0.913356	9166
ENY2	-0.913356	56943
NUDCD1	-0.913356	84955
SYBU	-0.913356	55638
MED30	-0.913171	90390
CHMP4C	-0.910037	92421
FABP12	-0.910037	646486
FABP9	-0.910037	646480
IMPA1	-0.910037	3612
PMP2	-0.910037	5375
SLC10A5	-0.910037	347051
SNX16	-0.910037	64089
ZFAND1	-0.910037	79752
EIF3E	-0.910021	3646
EMC2	-0.910021	9694
RSPO2	-0.910021	340419
TMEM74	-0.909598	157753
TRHR	-0.909598	7201
TAF2	-0.908939	6873
GRHL2	-0.908793	79977
NCALD	-0.908793	83988
MIR3150A	-0.907205	100422964
MIR3150B	-0.907205	100500907
PLEKHF2	-0.907205	79666
KCNV1	-0.905906	27012
RUNX1T1	-0.904941	862
OSGIN2	-0.90357	734
PKIA	-0.902853	5569
ZC2HC1A	-0.902853	51101
C8orf88	-0.902849	100127983
CALB1	-0.902849	793
DECR1	-0.902849	1666
LINC00534	-0.902849	100874052
LINC01030	-0.902849	101937451
LRRC69	-0.902849	100130742
MIR4661	-0.902849	100616245
NBN	-0.902849	4683
NECAB1	-0.902849	64168
OTUD6B	-0.902849	51633
SLC26A7	-0.902849	115111
TMEM64	-0.902849	169200
RALYL	-0.90262	138046
DEPTOR	-0.900686	64798
DSCC1	-0.900686	79075
HEY1	-0.899597	23462
STMN2	-0.899597	11075
FLJ46284	-0.89736	441369
ERICH5	-0.89718	203111
RPL30	-0.89718	6156
SNORA72	-0.89718	26775
MIR5708	-0.892902	100847056
ANKRD46	-0.892096	157567
MIR4471	-0.892096	100616451
MIR7705	-0.892096	102466854
PABPC1	-0.892096	26986
SNX31	-0.892096	169166
RNF19A	-0.891776	25897
POP1	-0.89099	10940
MATN2	-0.888696	4147
FABP5	-0.887768	2171
PAG1	-0.887768	55824
ZNF704	-0.887768	619279
GDF6	-0.887697	392255
PTDSS1	-0.886626	9791
UQCRB	-0.886626	7381
AZIN1	-0.885024	51582
KLF10	-0.885024	7071
ODF1	-0.885024	4956
ATP6V1C1	-0.881911	528
BAALC	-0.881911	79870
CTHRC1	-0.881911	115908
DCAF13	-0.881911	25879
FZD6	-0.881911	8323
MIR3151	-0.881911	100422992
SLC25A32	-0.881911	81034
TP53INP1	-0.881374	94241
CNBD1	-0.880528	168975
YWHAZ	-0.880442	7534
MIR2053	-0.878015	100302225
COX6C	-0.877961	1345
MIR599	-0.877961	693184
MIR875	-0.877961	100126309
OSR2	-0.877961	116039
RGS22	-0.877961	26166
VPS13B	-0.877961	157680
ZBTB10	-0.876818	65986
FBXO43	-0.876772	286151
POLR2K	-0.876772	5440
SPAG1	-0.876772	6674
CA13	-0.87274	377677
E2F5	-0.87274	1875
CPQ	-0.869607	10404
SDC2	-0.869607	6383
TSPYL5	-0.869607	85453
LRRCC1	-0.86803	85444
RIPK2	-0.866688	8767
LAPTM4B	-0.861317	55353
LINC01111	-0.860776	101926978
PEX2	-0.860776	5828
ZFHX4-AS1	-0.860776	100192378
CA1	-0.852955	759
CA3	-0.852955	761
DCAF4L2	-0.852846	138009
MMP16	-0.852846	4325
MTDH	-0.844396	92140
TACC1	-0.843276	6867
RMDN1	-0.839513	51115
CNGB3	-0.837962	54714
CPNE3	-0.837962	8895
ATP6V0D2	-0.827604	245972
SLC7A13	-0.827604	157724
WWP1	-0.827604	11059
REXO1L2P	-0.825411	100288527
FGFR1	-0.817779	2260
LETM2	-0.817779	137994
STAU2	-0.813581	27067
PSKH2	-0.806824	85481
GDAP1	-0.780723	54332
JPH1	-0.780723	56704
MIR2052	-0.780723	100302260
MIR5681A	-0.780723	100847058
MIR5681B	-0.780723	100847091
PI15	-0.780723	51050
CRISPLD1	-0.780599	83690
RDH10	-0.775617	157506
RPL7	-0.775617	6129
STAU2-AS1	-0.775617	100128126
TERF1	-0.775617	7013
LY96	-0.76306	23643
TMEM70	-0.76306	54968
UBE2W	-0.76306	55284
KCNB2	-0.750365	9312
LOC392232	-0.748406	392232
CSPP1	-0.745062	79848
DDHD2	-0.742661	23259
SLCO5A1	-0.732125	81796
ARFGEF1	-0.724114	10565
NCOA2	-0.72052	10499
EYA1	-0.719556	2138
MSC	-0.719556	9242
TRAM1	-0.715593	23471
ATP6V1H	-0.710069	51606
TOX	-0.706555	9760
HNF4G	-0.695714	3174
C8orf44	-0.690356	56260
C8orf44-SGK3	-0.690356	100533105
COPS5	-0.690356	10987
MCMDC2	-0.690356	157777
PPP1R42	-0.690356	286187
PTTG3P	-0.690356	26255
SGK3	-0.690356	23678
SNHG6	-0.690356	641638
SNORD87	-0.690356	641648
TCF24	-0.690356	100129654
NSMAF	-0.690292	8439
RNU6-83P	-0.689178	100873782
VCPIP1	-0.688998	80124
CYP7A1	-0.688093	1581
LOC101929528	-0.688093	101929528
SDCBP	-0.688093	6386
UBXN2B	-0.688093	137886
FAM110B	-0.687788	90362
PDE7A	-0.681557	5150
LACTB2	-0.681292	51110
XKR9	-0.678527	389668
OPRK1	-0.666482	4986
PRDM14	-0.659675	63978
C8orf34	-0.659612	116328
SULF1	-0.659466	23213
LOC100130298	-0.655937	100130298
RAB2A	-0.655937	5862
ASPH	-0.655572	444
CLVS1	-0.655572	157807
MIR4470	-0.655572	100616484
NKAIN3	-0.655572	286183
LINC00968	-0.654854	100507632
SBF1P1	-0.654584	100133234
PENK	-0.651573	5179
SDR16C6P	-0.651573	442388
CPA6	-0.651331	57094
CHCHD7	-0.648218	79145
PLAG1	-0.648218	5324
LINC00588	-0.640804	26138
XKR4	-0.637138	114786
NPBWR1	-0.624808	2831
PXDNL	-0.623537	137902
MYBL1	-0.622783	4603
LYN	-0.622163	4067
TGS1	-0.622163	96764
TMEM68	-0.622163	137695
CYP7B1	-0.622127	9420
SNTG1	-0.621453	54212
BHLHE22	-0.620534	27319
MIR124-2	-0.620534	406908
CRH	-0.620075	1392
DNAJC5B	-0.620075	85479
LINC00967	-0.620075	100505659
TRIM55	-0.620075	84675
ARMC1	-0.619104	55156
MTFR1	-0.619104	9650
GGH	-0.606101	8836
TTPA	-0.606101	7274
YTHDF3	-0.606101	253943
PCMTD1	-0.605642	115294
ST18	-0.605642	9705
ADHFE1	-0.597398	137872
RRS1	-0.597398	23212
RPS20	-0.595768	6224
SNORD54	-0.595768	26795
LINC00251	-0.592553	552859
RB1CC1	-0.591438	9821
MOS	-0.586809	4342
SOX17	-0.57913	64321
TCEA1	-0.573705	6917
RGS20	-0.573582	8601
LYPLA1	-0.559742	10434
MRPL15	-0.559742	29088
POMK	-0.470126	84197
DKK 4.00	-0.463789	27121
VDAC3	-0.463789	7419
HGSNAT	-0.463551	138050
SLC20A2	-0.457667	6575
SMIM19	-0.457667	114926
UBE2V2	-0.424104	7336
AP3M2	-0.421228	10947
IKBKB	-0.421228	3551
PLAT	-0.421228	5327
POLB	-0.421228	5423
SNAI2	-0.415898	6591
MCM4	-0.412895	4173
PRKDC	-0.398673	5591
LINC00293	-0.397663	497634
FNTA	-0.383892	2339
CEBPD	-0.362407	1052
SPIDR	-0.353624	23514
CHRNA6	-0.346956	8973
CHRNB3	-0.346956	1142
GOLGA7	-0.343592	51125
HOOK3	-0.342606	84376
RNF170	-0.309863	81790
THAP1	-0.309863	55145
GINS4	-0.237209	84296
KAT6A	-0.237209	7994
MIR486-2	-0.237209	102465696
NKX6-3	-0.237209	157848
BPIFA1	-0.11716	51297
BPIFA3	-0.11716	128861
BPIFB1	-0.11716	92747
CST3	-0.109243	1471
CST4	-0.109243	1472
C12orf4	-0.106098	57102
FGF23	-0.106098	8074
FGF6	-0.106098	2251
AKAP3	-0.101172	10566
DYRK4	-0.101172	8798
NDUFA9	-0.101172	4704
RAD51AP1	-0.101172	10635
SRGAP2D	-0.0950388	100996712
CST2	-0.094965	1470
CST5	-0.094965	1473
MIR3124	-0.0872108	100422879
PGBD2	-0.0872108	267002
SH3BP5L	-0.0872108	80851
ZNF672	-0.0872108	79894
ZNF692	-0.0872108	55657
TNFRSF19	-0.0635872	55504
SIRPB1	-0.0603025	10326
SIRPG	-0.0603025	55423
SCEL	-0.0601272	8796
C19orf12	-0.053874	83636
PLEKHF1	-0.053874	79156
POP4	-0.053874	10775
FBXL14	-0.0483018	144699
VSTM2B	-0.0481331	342865
SLC24A3	-0.0442443	57419
LOC101926935	-0.043875	101926935
WNT5B	-0.0432209	81029
FAM182B	-0.0428758	728882
LINC00550	-0.0369408	338862
CCNE1	-0.0354051	898
VEGFA	-0.0350864	7422
ERC1	-0.0343999	23085
CST9	-0.0308639	128822
URI1	-0.0305469	8725
VSX1	-0.0294329	30813
MAD2L1BP	-0.0284259	9587
ZNF337	-0.0282697	26152
GTPBP2	-0.0280856	54676
POLH	-0.0280856	5429
MRPS18A	-0.0280125	55168
RSPH9	-0.0280125	221421
LGALS13	-0.0278478	29124
LGALS14	-0.0278478	56891
LGALS16	-0.0278478	148003
LGALS17A	-0.0278478	400696
LOC100129935	-0.0278478	100129935
GGTLC1	-0.0266894	92086
LINC00417	-0.0266747	100874164
NANP	-0.0223428	140838
CST11	-0.0215966	140880
CST13P	-0.0215966	164380
CST8	-0.0215966	10047
CST9L	-0.0215966	128821
CSTL1	-0.0215966	128817
NAPB	-0.0215966	63908
ABHD12	-0.0212958	26090
LINC00906	-0.0202705	148145
LOC100420587	-0.0202705	100420587
LOC102724958	-0.0202705	102724958
UQCRFS1	-0.0202705	7386
NINL	-0.0202187	22981
ANKRD20A9P	-0.0198453	284232
MIPEP	-0.0192553	4285
PAX1	-0.0191648	5075
LRRC73	-0.0190975	221424
POLR1C	-0.0190975	9533
TJAP1	-0.0190975	93643
XPO5	-0.0190975	57510
YIPF3	-0.0190975	25844
RAD52	-0.0185195	5893
SYNDIG1	-0.0183627	79953
LINC00942	-0.018309	100292680
PARD6G-AS1	-0.0179208	100130522
WNK1	-0.0172249	65125
NAA16	-0.0170152	79612
PARD6G	-0.0156315	84552
FOXA2	-0.0155266	3170
GMFG	-0.0139118	9535
IFNL1	-0.0139118	282618
IFNL2	-0.0139118	282616
LRFN1	-0.0139118	57622
MIR621	-0.0135145	693206
SLC25A15	-0.0135145	10166
SUGT1P3	-0.0135145	283507
TPTE2P5	-0.0135145	100616668
WBP4	-0.0135145	11193
MIR320D1	-0.0131017	100313896
MRPS31	-0.0131017	10240
CD93	-0.0130351	22918
GZF1	-0.0130351	64412
LINC00656	-0.0130351	200261
NXT1	-0.0130351	29107
SSTR4	-0.0130351	6754
THBD	-0.0130351	7056
GINS1	-0.0130321	9837
KBTBD6	-0.0127193	89890
KBTBD7	-0.0127193	84078
MTRF1	-0.0127193	9617
FOXO1	-0.0118389	2308
RASSF2	-0.0116221	9770
ANKRD20A19P	-0.0115665	400110
C1QTNF9B	-0.0115665	387911
BPIFA2	-0.0111519	140683
BPIFA4P	-0.0111519	317716
BPIFB2	-0.0111519	80341
BPIFB3	-0.0111519	359710
BPIFB4	-0.0111519	149954
BPIFB6	-0.0111519	128859
SUN5	-0.0111519	140732
PYGB	-0.0106362	5834
NKX2-4	-0.0100019	644524
XRN2	-0.0100019	22803
UGGT2	0.0102682	55757
CHRNA4	0.0102848	1137
COL20A1	0.0102848	57642
CDX2	0.0111506	1045
PDX1	0.0111506	3651
URAD	0.0111506	646625
BIVM	0.0119821	54841
BIVM-ERCC5	0.0119821	100533467
ERCC5	0.0119821	2073
FGF14	0.0119821	2259
FGF14-AS2	0.0119821	283481
FGF14-IT1	0.0119821	283480
METTL21C	0.0119821	196541
METTL21EP	0.0119821	121952
TEX30	0.0119821	93081
TPP2	0.0119821	7174
LINC00343	0.0120224	144920
CDC16	0.013105	8881
CHAMP1	0.013105	283489
UPF3A	0.013105	65110
DAOA	0.0133343	267012
SLC10A2	0.0134013	6555
CLDN10	0.013617	9071
MIR2681	0.0143124	100616110
MIR4705	0.0143124	100616239
DAOA-AS1	0.0153722	282706
FLT3	0.0154111	2322
GPC6-AS2	0.0154123	100873973
HS6ST3	0.0166056	266722
NALCN-AS1	0.0167452	100885778
GTF3A	0.0174758	2971
MTIF3	0.0174758	219402
RASL11A	0.0175767	387496
RPL21	0.0175767	6144
RPL21P28	0.0175767	100131205
SNORA27	0.0175767	619499
SNORD102	0.0175767	26771
IPO5	0.0176735	3843
RNF113B	0.0176735	140432
MIR3170	0.0178147	100422881
GPC6-AS1	0.0180564	100873972
DNAJC3	0.0183587	5611
DZIP1	0.0183587	22873
ABCC4	0.0189835	10257
MIR548AS	0.0218151	100847092
LINC00353	0.022727	100874139
LINC00433	0.022727	100874168
LINC00559	0.022727	100874187
MIR622	0.022727	693207
LINC00397	0.0255998	101930749
MIR4500	0.0255998	100616182
MIR4500HG	0.0255998	642345
TMTC4	0.0262829	84899
PCCA-AS1	0.0271698	100885777
LOC101927284	0.0275382	101927284
GPR180	0.0289263	160897
SOX21	0.0289263	11166
SOX21-AS1	0.0289263	100507533
TGDS	0.0289263	23483
GGACT	0.0293362	87769
ZIC2	0.0307882	7546
PCCA	0.0308182	5095
OVOL2	0.0327854	58495
LINC00554	0.0332853	100861542
DOCK5	0.0383737	80005
GNRH1	0.0383737	2796
KCTD9	0.0383737	54793
MIR6841	0.0389561	102465506
MIR6876	0.0389561	102465527
NEFL	0.0389561	4747
CLDN10-AS1	0.0402473	100874194
KLF5	0.0440883	688
CLYBL-AS2	0.0460845	100874063
SNORD12	0.0461215	692057
SNORD12B	0.0461215	100113393
SNORD12C	0.0461215	26765
ZFAS1	0.0461215	441951
ZNFX1	0.0461215	57169
LINC00379	0.0489124	100874150
LINC00380	0.0489124	101930747
LINC00410	0.0489124	144776
MIR17	0.0489124	406952
MIR17HG	0.0489124	407975
MIR18A	0.0489124	406953
MIR19A	0.0489124	406979
MIR19B1	0.0489124	406980
MIR20A	0.0489124	406982
MIR92A1	0.0489124	407048
GPC5	0.0493741	2262
CLYBL	0.0502957	171425
MIR4306	0.0502957	100422861
PIBF1	0.0515007	10464
LINC00378	0.0763396	101926930
MIR3169	0.0763396	100422973
PCDH20	0.0763396	64881
MACROD2	0.0906072	140733
DNAJC15	0.113554	29103
EPSTI1	0.113554	94240
DIAPH3	0.133613	81624
DIAPH3-AS1	0.133613	100874195
DIAPH3-AS2	0.133613	100874196
TDRD3	0.133613	81550
STAU1	0.182813	6780
RBFOX1	0.204995	54715
ZIC5	0.213328	85416
MACROD2-AS1	0.346653	100379174
